# Supplementary material for: Predicting gene regulatory networks from cell atlases
Source: Life Sci Alliance. 2020 Sep 21;3(11):e202000658. doi: 10.26508/lsa.202000658 (PMC7536823; doi:10.26508/lsa.202000658)
Supplement: Supplementary file 3 [file LSA-2020-00658_TableS2.xlsx]

## Sheet: Regulon_AllAtlases
Regulon	GeneComposition(All_atlas_merged)	NumGenes	RegulonModule
Cebpb	'Chac1', 'Slc7a11', 'Il6ra', 'Dram1', 'Prrx1', 'Actb', 'Per1', 'Rara', 'Ptx3', 'Rnf149', 'Twist2', 'Samd4', 'Pparg', 'Jun', 'Lmo4', 'Trib1', 'Aldh3b1', 'Steap4', 'C3', 'Dlg4', 'Scara3', 'Nfkbiz', 'Il1rn', 'Ccr2', 'Prkg1', 'Il1b', 'Adamts5', 'Arrdc3', 'Sirpa', 'Lrrfip2', 'Slc11a1', 'Tspan13', 'Osmr', 'Tac1', 'Flot1', 'Dbp', 'Rgs18', 'Speg', 'Trf', 'Mmp9', 'Hpse', 'Pdgfra', 'Actn1', 'F630028O10Rik'…	3503	1
Elk3	'Cog3', 'Nr1h2', 'Rnf167', 'Ppp4c', 'Gnai3', 'Ippk', 'Lypla2', 'Gga1', 'Kti12', 'Cdk13', 'Arfip1', 'Arpc2', 'Senp7', 'Ywhab', 'Tsg101', 'Tbc1d22a', 'Sfswap', 'Bcl2l1', 'Zfp410', 'Ccnt1', 'Tssc4', 'Rac1', 'Epn1', 'Atg16l1', 'Kctd2', 'Ss18', 'Fbxo28', 'Mta2', 'Cap1', 'Rab11a', 'Mfap1b', 'Dzip3', 'Slc25a46', 'Csnk1g1', 'Map3k7', 'Trip4', 'Dpp8', 'Usf1', 'Tmbim6', 'Nosip', 'Zcchc6', 'Cradd', 'Hnrnpd'…	3466	1
Irf1	'Rsad2', 'Rtp4', 'Usp18', 'Irf2', 'Ifit3', 'Cxcl10', 'Tcirg1', 'Dnpep', 'Isg15', 'Il15ra', 'Dusp10', '1700056E22Rik', 'Dkk2', 'Rbck1', 'Socs1', 'Rasgrp3', 'Cdkn1c', 'Parp14', 'Gas5', 'Bst2', 'Ccnt2', 'Oasl1', 'Cd274', 'B2m', 'H2-K2', 'Bdnf', 'Rapgef4', 'Plekha3', 'Pik3r3', 'Erap1', 'Ifit1', 'Map3k8', 'Cnksr3', 'H2-K1', 'Myd88', 'Xaf1', 'H2-Q6', 'Ccnd1', 'Pla1a', 'Apbb2', 'Sgk1', 'Arid4b', 'Cdipt'…	3347	1
Crem	'Ube2h', 'Braf', 'Aig1', 'Btbd9', 'Vps37b', 'Tiprl', 'Usp36', 'Dok2', 'Kdm2b', 'Arih1', 'Zfp593', 'Stx5a', 'Gas5', 'Mzt2', 'Heca', 'Ell2', 'Adnp2', 'Hhip', 'Spag9', 'Josd1', 'Rps29', 'Fdxacb1', 'Calm2', 'Ttc19', 'Stk19', 'Rheb', 'Dhx40', 'Opa3', 'Ahr', 'Gan', 'Nol10', 'Thada', 'Ypel5', 'Pard6a', 'Gla', 'Mxd1', 'Fam134b', 'Aff4', 'Slc35e1', 'Cbwd1', 'Ppp2ca', 'Rel', 'Golph3', 'Map1lc3a', 'Tspan13'…	3070	1
Ets2	'Tjp2', 'Prkab1', 'Arhgap27', 'Cldn7', 'Las1l', 'Gata3', 'Vsig10', 'Liph', '1810011O10Rik', 'Adam10', 'Shoc2', 'Hyal2', 'U2af2', 'Rpl28', 'Tpm3', 'Hbegf', 'Pabpn1', 'Hmg20a', 'Map3k11', 'Zfp408', 'Hdac7', 'Trim41', 'Tanc1', 'Bag6', 'Fosl2', 'Eaf1', 'Pcdh17', 'Pigm', 'Ywhab', 'Zfp410', 'Tead2', 'Sema4c', 'Ss18', 'Rer1', 'Tnfrsf1a', 'Txnip', 'Myo1c', 'Rpl37', 'AU019823', 'Etv3', 'Zcchc6', 'Ippk', '…	2610	1
Cebpd	'Dram1', 'Ddit3', 'Jun', 'Ace', 'Peli2', 'Vim', 'Fos', 'Rhob', 'Svep1', 'Twist2', 'Fermt2', '1700112E06Rik', 'Creb5', 'Nfib', 'Ptx3', 'Pycr1', 'Runx1t1', 'Lox', 'Gnas', 'Smad7', 'Osmr', 'Lmo4', 'Dlg4', 'Spry4', 'Thra', 'Steap4', 'Tac1', 'Adamts5', 'Prnp', 'Actn1', 'Pdgfrb', 'Inhba', 'Pdgfra', 'Mesdc1', 'Ctbp2', 'Sh3gl1', 'Osr1', 'Sept2', 'Il6', 'Mat2a', 'Zfhx2', 'Ncam1', 'Sntb2', 'Morf4l2', 'Csnk…	2331	1
Foxo1	'Trim8', 'Nfatc1', 'Cadm1', 'Nr4a2', 'Pan3', 'Peli2', 'Pop5', 'Prrx1', 'Dixdc1', 'Sh2b3', 'Trib1', 'Atxn7l1', 'Samd4', 'Prdm16', 'Igfbp3', 'Ddit4', 'Nek7', 'Tsc22d4', 'Foxp1', 'Trib2', 'Nfatc2', 'Atxn1', 'Zfhx2', 'Azin1', 'Ppp3ca', 'Hivep2', 'Btg1', 'Rnf2', 'Pim2', 'Inppl1', 'Chst11', 'Zfp36l1', 'Ep300', 'Prkd2', 'Rnf19b', 'Cdkn2aip', 'Sh3bp1', 'Stag2', 'Cd109', 'Zhx2', 'Zfp36l2', 'Mtus1', 'Tsc1'…	1562	1
Bcl3	'Nfkb2', 'Cxcl10', 'Nfkbiz', 'Tnfaip3', 'Nfkbia', 'Map3k8', 'Relb', 'Rel', 'Cxcl1', 'Neurl3', 'Hivep2', 'Gadd45b', 'Icam1', 'Sdc4', 'Cxcl2', 'Stx11', 'Ebf1', 'Mapk6', 'Steap4', 'Tnip1', 'Nr4a2', 'Ptms', 'Il1f9', 'Myo1e', 'Dennd4a', 'B2m', 'Camta1', 'Tfpi2', 'Rras', 'Il6', 'Csf1', 'Irf1', 'H2-D1', 'Egr2', 'Prps1', 'Jak2', 'Ccnl1', 'Tnfaip2', 'Actn1', 'Nab1', 'Cd93', 'Osmr', 'Casp4', 'Cxcl9', 'Rnd1…	1545	1
Cebpa	'Il6ra', 'Rbp4', 'Rad23b', 'Dram1', 'Wfdc2', 'Krt23', 'Itpr3', 'Aqp9', 'Rnf149', 'Homer2', 'Ccl3', 'Steap4', '1700112E06Rik', 'Foxa2', 'Fbxo3', 'Zbtb44', 'Slc35d1', 'Hsd11b1', 'Herpud1', 'Il1rn', 'Hpse', 'Ccr2', 'Il1b', 'Fam129b', 'Klf5', 'Ak4', 'Ftl1', 'Gars', 'Nadk', 'Slc34a2', 'Slpi', 'Dmkn', 'Nr1h3', 'Hnrnpul2', 'Glrx5', 'Trf', 'Esrra', 'Psat1', 'Rarres1', 'Slc11a1', 'Krt10', 'Pus10', 'Sbsn',…	1457	1
Nfil3	'Dusp1', 'Gla', 'Vps37b', 'Dusp5', 'Errfi1', 'Filip1l', 'Jdp2', 'Dennd5a', 'Jun', 'Heca', 'Creb5', 'Golph3', 'Picalm', 'Rap1b', 'Hsp90ab1', 'Ptpn11', 'Dok2', 'Atl2', 'Tpm4', 'Atxn1', 'Maff', 'Gabarap', '1700084E18Rik', 'Ccl4', 'Tra2a', 'Fnip2', 'Klf6', 'Hivep1', 'Aldh1a2', 'Des', 'Cdk14', 'Camk2n1', 'Bhlhe40', 'Zfp36l1', 'Gpbp1', 'Btg1', 'Rnf19b', 'Fos', 'Pdp1', 'E2f7', 'Plk2', 'Zyx', 'Cnnm4', 'E…	1291	1
Stat3	'Gadd45b', 'Sphk1', 'March5', 'Stat3', 'Taf4b', 'Pprc1', 'Wac', 'Cebpb', 'Crem', 'Bcl3', 'Csrnp1', 'Casp4', 'Ifrd1', 'Tnfaip3', 'Pde4b', 'Itpkc', 'Rara', 'Smox', 'Pcdh17', 'Map2k3', 'Kdm6b', 'Flnc', 'Junb', 'Rela', 'Lmna', 'Hmox1', 'Lamc1', 'Bag3', 'Calm1', 'Ahnak', 'Ctnnal1', 'Mapk6', 'Vim', 'Igfbp6', 'Cyth3', 'Elk3', 'Arc', 'Tnfrsf12a', 'P2rx7', 'Aff1', 'Zfp36', 'Eif5', 'Ptp4a2', 'Slc38a2', 'It…	1284	1
Tgif1	'Vps37b', 'Dusp1', 'Ell2', 'Josd1', 'Cnnm4', 'Ppp2ca', 'Tmem59l', 'Zfp593', 'Btg2', 'Senp2', 'Nup98', 'Areg', 'Trib1', 'Relb', 'Gas5', 'Usp36', 'Dnttip1', '9530068E07Rik', 'Opa3', 'Zbtb11', 'Nr4a2', 'Kif5c', 'Gprc5a', 'Sidt2', 'Taf4b', 'Cxcl16', 'Maff', 'Golph3', 'Creb3l2', 'Rcan1', 'Fn1', 'Ppp1r15a', 'Cldn7', 'Arl5b', 'Ubn1', 'Ccdc86', 'Sik3', 'Ntrk2', 'Fbxo33', 'Cstf3', 'Foxp2', 'Epha2', 'Wsb1'…	978	1
Bach1	'Mthfr', 'Atg3', 'Gla', 'Picalm', 'Atp6v0b', 'Nptn', 'Gabarap', 'Mfsd1', 'Ubn1', 'Rragc', 'Brox', 'Osbpl8', 'Atp6v0d1', 'Dolk', 'Mafg', 'Gtf2h1', 'H2afz', 'Mbtd1', '2310022A10Rik', 'Fnip1', 'Rab3il1', 'Tpp1', 'Dleu2', 'Mfsd7c', 'Tnfaip3', 'Slc25a33', 'Rps6ka4', 'Sik3', 'Lamp1', 'Lats2', 'Gnb2', 'Dusp1', 'Cltc', 'Taf4b', 'Cry1', 'Batf3', 'Atp6v1a', '6430548M08Rik', 'Trim25', 'Lmnb1', 'Avpi1', 'Daz…	971	1
Mafb	'Srxn1', 'Mmp13', 'Fchsd1', 'Fam83g', 'Aldoa', 'Lpin3', 'Htatip2', 'Tmem54', 'Cd68', 'Arap2', 'Fam110a', 'Tmem37', 'Tmem40', 'Gdpd3', 'Dmpk', 'Prss36', 'Fam25c', 'Gja1', 'Tbxas1', 'Cd14', 'Ctnna1', 'P2ry6', 'Ankrd22', 'Ccl24', 'Dmkn', 'Txn1', 'Ywhag', 'Mal2', 'Prdx1', 'Sec16b', 'Vav3', 'Rab27b', 'Pisd', 'Dstn', 'Il1rn', 'Trib1', 'Zbtb7b', 'Phlda2', 'Adrm1', 'Mark2', 'Kctd11', 'Fos', 'Vit', 'Sprr1…	954	1
Tfe3	'Picalm', 'Bhlhe40', 'Gabarap', 'Tom1', 'Atp2b1', 'Atp6v1a', 'Sirpa', 'Hbp1', 'Hdac5', 'Dirc2', 'Mafg', 'Runx1', 'Lox', 'Tmcc1', 'Dusp3', 'Sox10', 'Kbtbd2', 'Mdfic', 'Ap1s2', 'Dpysl4', 'Tle3', 'Skap2', 'Tet2', 'Dab2', 'Trak1', 'Gpnmb', 'Mum1l1', 'Dennd5a', 'Spg20', 'Vwa5a', 'Sin3a', 'Ctsk', 'Mlph', 'Fnip1', 'Elf4', 'Rara', 'Fam110b', 'Fhad1', 'Snx16', 'Slc7a11', 'Etv5', 'Ddit3', 'Zbtb2', 'Rbms1',…	684	1
Mafg	'Hmox1', 'Mafg', 'Fth1', 'Slc48a1', 'Ctgf', 'Ftl1', 'Bcor', 'Mnt', 'Klhl21', 'Zfp36', 'Mgst1', 'Ube2o', 'Mpp5', 'Bcl9l', 'Slc11a1', 'Pfn2', 'Gpd2', 'Fbxo30', 'Lrrfip2', '1190002N15Rik', 'Fxyd3', 'Zfp385b', 'Mllt11', 'Txn1', 'Col11a1', 'Ctsd', 'Zswim6', 'Mvp', 'Tanc1', 'Irf1', 'Pde4d', 'Cttnbp2nl', 'Nfkbiz', 'Tnfrsf1a', 'Akap12', 'Zbtb7a', 'Pafah1b1', 'Necab3', 'Sertad2', 'Ppard', 'Col27a1', 'Wdfy…	676	1
Rela	'Nfkb2', 'Nfkbia', 'Cxcl10', 'Icam1', 'Relb', 'Map3k8', 'Cxcl1', 'Cxcl2', 'Cfl2', 'Tnip1', 'Mapk6', 'Irf1', 'Casp4', 'Stx11', 'Fas', 'Gabpb1', 'Gnb1', 'Csf1', 'Cxcl9', 'Adamts4', 'Rnd1', 'Itga5', 'Tgif1', 'Bcl3', 'Ube2n', 'Cdkn1a', 'Nck1', 'Pde4b', 'Nova1', 'Sema6a', 'Sulf1', 'Bmp4', 'Gas5', 'Rela', 'Ncam1', 'Arf4', 'Rhoj', 'Rab40c', 'Spred1', 'Cd36', 'Pde1c', 'Fosl1', 'Samd5', 'Prkab2', 'Ubtd1',…	559	1
Mef2a	'Mef2a', 'Oxr1', 'Polr3gl', 'Cdc42ep2', 'Asap1', 'Appl1', 'B4galt4', 'Pafah1b1', 'Acvr1b', 'Fkbpl', 'Hdac5', 'Arhgef2', 'Spop', 'Cbl', 'Dync1li2', 'Tbc1d20', 'Kif3c', 'Rilpl1', 'St3gal4', 'Zbtb46', 'Styx', 'Trafd1', 'Crebbp', 'Lims1', 'Nr4a3', 'Mest', 'Rara', 'Ckm', 'Cyth4', 'Runx1t1', 'Mef2d', 'Nrgn', 'Ercc1', 'Ahnak', 'Pitpnm2', 'Thap11', 'Tmcc2', 'Mdm4', 'Mga', 'Limch1', 'Cic', 'R3hdm2', 'Zfp5…	432	1
Sox17	'Vwf', 'Ptprb', 'Pecam1', 'Tie1', 'Cdh5', 'Cd36', 'Myct1', 'Sdpr', 'Podxl', 'Arap3', 'Apold1', 'Ushbp1', 'Nrarp', 'Ccnyl1', 'Gpihbp1', 'Tinagl1', 'Ppp1r16b', 'Tek', 'E2f7', 'Egfl8', 'Znrf1', 'Itpkb', 'Aplp1', 'Sh3gl3', 'Lrrc8a', '1700084E18Rik', 'Ipo11', 'Fli1', 'Nos3', 'Dock9', 'Spag9', 'Tspan13', 'Pola2', 'Pcdh17', 'Parp9', 'Rapgef2', 'Efnb2', 'Cdkn2aip', 'Rab5c', 'Clec14a', 'Tbcc', 'Dach1', 'H…	333	1
Gata3	'Ikzf2', 'Cd27', 'Ano1', 'Itk', 'Uchl1', 'Sytl2', 'Cd247', 'Txk', 'Dok2', 'Slc14a1', 'Krt18', 'Tes', 'Rbm15b', 'Madd', 'Arhgap1', 'Sh3gl2', 'Lef1', 'Tox', 'Nck2', '4930486L24Rik', 'Pparg', 'Akirin1', 'Leprotl1', 'Urb2', 'Cldn7', 'Arl4c', 'Rai1', 'Rab27b', 'Atp8b1', 'Cdh1', 'Plagl2', 'Lpcat4', 'Sfn', 'Chmp4b', 'Klhl25', 'Mta3', 'Atp6v0a1', 'Lad1', 'Etv3', 'Sc5d', 'Tle3', 'Usp47', 'Sema4a', 'Aff4',…	428	2
Klf16	'Mycn', 'Polr2d', 'Syncrip', 'Med26', 'Cox7a2l', 'Rpl41', 'Tra2b', 'Eif3e', 'Eif5a', 'Gas5', 'Rpl39', 'Ppp2r2a', 'Arf6', 'Rgs12', 'Ptma', 'Bcl10', 'Ckmt1', 'Myc', 'Nolc1', 'Impdh2', 'Ubap1', 'Eef1g', 'Aldh1a3', 'Avpi1', 'Cirbp', 'Nxn', 'Apoc1', 'Eef1e1', 'Plk3', 'Blzf1', 'Sf3b4', 'Nhp2', 'Irf6', 'Trappc6a', 'Rpl4', 'Lancl1', 'Tgif2', 'Prpf38a', 'Sox2', 'Mapkapk3', 'Rps13', 'Cbwd1', 'Rfx2', 'Nob1'…	281	2
Atf3	'Fosb', 'Tpm4', 'Arg2', 'Dusp1', 'Lrrc8a', 'Nr4a2', 'Tmem59l', 'Ppp2ca', 'Impdh2', 'Zfp593', 'Ahcyl1', 'Gem', 'Pitx2', 'Btg2', 'Tubb2b', 'Akirin1', 'Cds1', 'Epha2', 'Gprc5a', 'Trib1', 'Ldha', 'Arih1', 'Golph3', 'Isl1', 'Sidt2', 'Zbtb11', 'Ppp1r15a', 'Rab25', 'Clk4', 'Atf3', 'Pmvk', 'Ptp4a1', 'Dusp8', 'Ntrk2', 'Aig1', 'Arl5b', 'Tra2a', 'Jun', 'Avpi1', 'Arl4d', 'Eif1', 'Ythdc1', 'Maff', 'Cldn7', 'G…	3514	3
Xbp1	'Ube2h', 'Amdhd2', 'Dusp1', 'Ube2b', 'Picalm', 'Pdia5', 'Osbp', 'Atg3', 'Tmem39a', 'Napa', 'Sec16b', 'Mthfr', 'Gmppb', 'Tmem214', 'Mcoln1', 'Scfd1', 'Ssr1', 'Gnptg', 'Uso1', 'Tmed2', 'Rab21', 'Vps33a', 'Ssr4', 'Pdp1', 'Srpr', 'Sec63', 'Sec24c', 'Golga1', 'Klhl12', 'Cuta', 'Nup98', 'Morf4l2', 'Clasp2', 'Asb3', 'Stx5a', 'Mfsd1', 'Nf1', 'Arcn1', 'Tm9sf3', 'Slc35b2', 'Tmem55b', 'Usp31', 'Tiprl', 'Bro…	3482	3
Atf4	'Ube2h', 'Tead1', 'Gla', 'Tpm4', 'Spred2', 'Vps37b', 'Zfp593', 'Rcan1', 'Lrrc8a', 'Usp36', 'Ell2', 'Dusp8', 'Fosb', 'Flt1', 'Golph3', 'Kif5c', 'Gas5', 'Epha2', 'Pdlim3', 'Nup98', 'Gem', 'Maff', 'Ppp2ca', 'Opa3', 'Senp2', 'Adnp2', 'Nr4a2', 'Tubb2b', 'Vamp3', 'Btg2', 'Ppp1r15a', 'Cyr61', 'Spag9', 'Appbp2', 'Fbxo33', 'Tmem147', 'Fn1', 'Nfatc2', 'Relb', 'D17Wsu92e', 'Bdp1', 'Stard3nl', 'Abhd16a', 'Bc…	3265	3
Fosl1	'D17Wsu92e', 'Arg2', 'Josd1', 'Bcl2l13', 'Map1lc3a', 'Usp36', 'Pdlim3', 'Ppp2ca', 'Areg', 'Ntrk2', 'Rad23a', 'Trib1', 'Zfp593', 'Cds1', 'Pitx2', 'Maff', 'Akirin1', 'Emd', 'Gas5', 'Gigyf2', 'Pmvk', 'Wdr62', 'Btg2', 'Abce1', 'Anapc10', 'Usp2', 'Plekhh3', 'Appbp2', 'Thoc1', 'Psmb2', 'Senp2', 'Ube2n', 'Fbxo34', 'Homer2', 'Rab25', 'Ubap1', 'Ripk4', 'Zfand5', 'Rnf7', 'Ywhag', 'Otud6b', 'Epha2', 'Rbbp8'…	3205	3
Junb	'Emp3', 'Plec', 'Mpv17', 'Map2k3', 'Lmna', 'Rtn4', 'Anxa1', 'Junb', 'H3f3b', 'Bag3', 'Tagln2', 'Vim', 'Lgals3', 'Bcl9l', 'Dnajb5', 'Calm1', 'Fam129b', 'Epha2', 'Lamc1', 'Slc2a1', 'Elk3', 'Sertad1', 'Ahnak', 'Cav1', 'Itgav', 'Col12a1', 'Timp2', 'Tnfrsf12a', 'Sdc4', 'Mnt', 'Igfbp4', 'Mapre2', 'Mafg', 'Ifrd1', 'Heg1', 'Gtf2ird1', 'Celf4', 'Hcfc1r1', 'Lamb3', 'Kdm6b', 'Bloc1s1', 'Cttnbp2nl', 'Anxa5',…	2836	3
Fos	'Fosb', 'Jun', 'Tubb2b', 'Dusp1', 'Atf3', 'Nfkbiz', 'Hoxa10', 'Klf6', 'Fos', 'Btg2', 'Lmo4', 'Egr1', 'Ier2', 'Junb', 'Tmem165', 'Gcc1', 'Sat1', 'Rgs2', 'Neat1', 'Kctd11', 'Tmem65', 'Ctbp2', 'Yif1b', 'Atp2b4', 'Nr4a1', 'Rarg', 'Myd88', 'Rhob', 'Tmem43', 'Klf4', 'Zfp36', 'Ubb', 'Per1', 'Lztfl1', 'St7', 'Cars', 'Pdgfd', 'Papss1', 'Gla', 'Nup98', 'Aldh1a2', '1700112E06Rik', 'Klf9', 'Slc35b1', 'Cdkn2a…	2808	3
Klf5	'Ppp2ca', 'Chl1', 'St14', 'Ctf1', 'Kctd15', 'Cldn3', 'Tnks1bp1', 'Coro1c', 'Stxbp2', 'Dohh', 'Fxyd3', 'Wee1', 'Efnb1', 'Iffo2', 'Ctnnbip1', 'Wasl', 'Gtf2f2', 'Rell1', 'Adss', 'Ces1d', 'Tuft1', 'Psmb5', 'Gnb2', 'Sesn3', 'Ppp1r14b', 'Ftsj3', 'Psmc5', 'Tbc1d2', 'Mgst3', 'Erbb2', 'Por', 'Rpl4', 'Cast', 'Pmm1', 'Plekhh3', 'Apoo', 'Wiz', 'Clpb', 'Rps24', 'Nhsl1', 'Baiap2l1', 'Nol7', 'Uba1', 'Cyp2s1', '…	2774	3
Fosl2	'Tpm4', 'Vps37b', 'Heca', 'Dusp1', 'Ell2', 'Fosb', 'Cnnm4', 'Ric8b', 'Avpi1', 'Tmem39a', 'Btg2', 'Flt1', 'S1pr2', 'Dok1', 'Dusp8', 'Rap1b', 'Sik1', 'Gem', 'Trib1', 'Relb', 'Map1lc3a', 'Tubb2b', 'Usp36', 'Opa3', 'Zbtb11', 'Nr4a2', 'Kif5c', 'Daam2', 'Gprc5a', 'Ccnl1', 'Baz2b', 'Sidt2', 'Taf4b', 'Ltbp1', 'Spred2', 'Cxcl16', 'Maff', 'Golph3', 'Rcan1', 'Adnp2', 'Ppp1r15a', 'Plekha4', 'Tubb2a', 'Atl2',…	2714	3
Jun	'Svep1', 'Dkk2', 'Egr1', 'Ssbp2', 'Tpm1', 'Gadd45b', 'Sgk1', 'Isl1', 'Bdnf', 'Plxna2', 'Srsf2', 'Ntf3', 'Ccdc88a', 'Mat2a', 'Nrarp', 'Actg1', 'Zfp503', 'Zfp36l1', 'Dstn', 'Fosb', 'Ctnna1', 'Hic1', 'Wnt2', 'Cdkn2aip', 'Lims2', 'Aldoa', 'Plk3', 'Glg1', 'Hoxa10', 'Per1', 'Sh3gl1', 'Cyr61', 'Irf1', 'Mycn', 'Zfand5', 'Adamts1', 'Tmem55a', 'Ccnd1', 'Fos', 'Slc12a2', 'Sema6d', 'Adamtsl1', 'Pros1', 'Pcgf…	2457	3
Rxra	'Fabp1', 'Apoa1', 'Mttp', 'Agt', 'Psen2', 'Depdc7', 'Gls2', 'Sord', 'Aass', 'Lpin1', 'Aqp9', 'Orm1', 'Apoa2', 'Aldob', 'Pygl', 'Aldh1l1', 'Cyp4v3', 'Acox1', 'Scp2', 'Hmgcs2', 'Zfyve1', 'Etfb', 'Vps54', 'Sec24c', 'Me1', 'Arhgef19', 'Ttc36', 'Grb7', 'Nr2f6', 'Wdr7', 'Rbpms2', 'Lonp2', 'Pfkfb1', 'Hpn', 'Fdx1', 'Dnajc16', 'Zfp384', 'Crls1', 'Pigr', 'Pon3', 'Ddc', 'Adh1', 'Nr1h3', 'Sephs2', 'Aifm2', '…	2212	3
Creb3l1	'Kdelr3', 'Rcn1', 'Rcn3', 'Fkbp14', 'Mmp23', 'Cpxm1', 'Dpep1', 'Lhfp', 'Creb3l1', 'Plxdc2', 'Col5a2', 'Col16a1', 'Chpf', 'Mrc2', 'Sorcs2', 'Serpinh1', 'Sparc', 'Ssr1', 'Prrx1', 'Sec16b', 'Sec23a', 'Col1a2', 'Rftn2', 'Fkbp11', 'Prrc1', 'Sh3gl1', 'Stx5a', '1810055G02Rik', 'P4ha1', 'Trp53inp2', 'Cdh11', 'Gorasp2', 'Kdelr2', 'Col1a1', 'Ptov1', 'Adamtsl1', 'Col11a1', 'Ssr3', 'Nkain4', 'Ppp1r10', 'Bdnf…	2125	3
Esrra	'Ldhb', 'Fxyd2', 'Steap2', 'Atp1b1', 'Ndufb4', 'Atp5l', 'Cox6c', 'Tcn2', 'Aco2', 'Pdha1', 'Mfap3l', 'Cycs', 'Oxct1', 'Phyhipl', 'Cox7a1', 'Osbpl6', 'Pth1r', 'Pdzk1ip1', 'Kidins220', 'Hnf1b', 'Tmem116', 'Atp6v1a', 'Ndufb8', 'Acss1', 'Galc', 'Acss2', 'Hspbp1', 'Fam160a2', 'Tmem87b', 'Tbl2', 'Rab22a', 'Esrra', 'Ap3d1', 'Axin1', 'Fchsd1', 'Tarsl2', 'Abcd1', 'Pcbp3', 'Ctnnbip1', 'Spa17', 'Fig4', 'Rprd…	2100	3
Myc	'Lmna', 'Rtn4', 'Hmox1', 'Itpkc', 'Anxa1', 'Gal', 'H3f3b', 'Bmp1', 'Bag3', 'Tac1', 'Vim', 'Lgals3', 'Brix1', 'Dnajb5', 'Fam129b', 'Lamc1', 'Slc2a1', 'Sertad1', 'Sbsn', 'Tnfrsf12a', 'Nup153', 'Dusp7', 'Csdc2', 'Pcsk6', 'Ifrd1', 'Celf4', 'F3', 'Lamb3', 'Kdm6b', 'Clip4', 'Sema3c', 'Bach1', 'Col5a3', 'Adora2b', 'Zbtb7a', 'Csrnp1', 'Pcolce', 'Tgfbi', 'Gem', 'Spred1', 'Pdap1', 'Gadd45a', 'Flnc', 'Vangl…	2075	3
Klf15	'Acss2', 'Hspbp1', 'Gpr155', 'Ap3d1', 'Reep6', 'Prpf8', 'Atf5', 'Zhx1', 'Blvrb', 'Itsn1', 'Tpcn1', 'Fhod1', 'Bcap31', 'Cryzl1', 'Apeh', 'Eepd1', 'Tbl2', 'Sec14l2', 'Lman1', 'Lin52', 'Ift80', 'Adnp2', 'Tmem87b', 'Znrf3', 'Tmub2', 'Lpcat3', 'Pja2', 'Pgrmc2', 'Aldh6a1', 'Adam9', 'Rprd1a', 'Tm2d2', 'Gm2a', 'Pcsk4', 'Rab8a', 'Nmnat3', 'Adk', 'Ap3m1', 'Xpr1', 'Ccl27a', 'Cldn3', 'Car5b', 'Bsdc1', 'Siae'…	2058	3
Ehf	'Appl2', 'Fibp', 'Lypla2', 'Eif3i', 'Tmem41b', 'Arpc5l', 'Rps27l', 'Slc25a17', 'Polr2j', 'Arpc1a', 'Vps53', 'Erp44', 'Tsg101', 'Suds3', 'Crb3', 'Sptlc2', 'Dcun1d3', 'Elmo3', 'Rab11a', 'Fam188a', 'Eif4e2', 'Rpl32', 'Rps25', 'Vps33b', '1110004E09Rik', 'Wdr1', 'Pyroxd1', 'Mark2', 'Lrrfip2', 'Arfip2', 'Cep164', 'Akirin2', 'Sec24c', 'Pick1', 'Mpzl3', 'Rac1', 'Chchd5', 'Rnf10', 'Bag4', 'Lsr', 'Fbxo28',…	2050	3
Elf3	'Ppp4c', 'Appl2', 'Fibp', 'Urm1', 'Ube2n', 'Epn1', 'Tsg101', 'Vps25', 'Fam188a', 'Rab11a', 'Arpc5l', 'Pyroxd1', 'Eif3i', 'Erh', 'Shoc2', 'Mark2', 'Pigt', 'Sptlc2', 'Ctnna1', 'Otud7b', 'Kctd5', 'Sec24c', 'Ap1b1', 'Parl', 'Nudt5', 'Cdc123', 'Atp6v1d', 'Txn2', 'Timm23', 'Chchd5', 'Hspa4', 'Arhgap27', 'Erp44', 'Ap3s2', '1110004E09Rik', 'Rpl32', 'Sys1', 'Rnf10', 'Dusp6', 'Vps53', 'Slc39a6', 'Las1l', '…	2010	3
Fosb	'Tead1', 'Sirt1', 'Samd4', 'Dusp1', 'Nfatc1', 'Fosb', 'Gla', 'Ube2h', 'Tubb2b', 'Azin1', 'Adnp2', 'Errfi1', 'Jdp2', 'Atf3', 'Cadm1', 'Jun', 'Golph3', 'Ccnyl1', 'Peli2', 'Picalm', 'Insig1', 'Thra', 'Impdh2', 'Ppp2ca', 'Ptpn11', 'Rbp4', 'Dkk2', 'Opa3', 'Fam53c', 'Atxn1', 'Maff', 'Ppp2r2d', 'Hipk1', 'Hoxa10', 'Tra2a', 'Runx1', 'Igfbp3', 'Epas1', 'Taf4b', 'Klf6', 'Hivep1', 'Aldh1a2', 'Smarca2', 'Plp1…	1995	3
Maff	'Ube2h', 'Tpm4', 'D17Wsu92e', 'Dusp1', 'Fosb', 'Ppp2ca', 'Avpi1', 'Zfp593', 'Tmem39a', 'Btg2', 'S1pr2', 'Nup98', 'Dusp8', 'Rap1b', 'Tra2a', 'Abhd16a', 'Gem', 'Trib1', 'Relb', 'Gpm6b', 'Gas5', 'Map1lc3a', 'Tubb2b', 'Usp36', 'Opa3', 'Zbtb11', 'Nr4a2', 'Gprc5a', 'Ccnl1', 'Appbp2', 'Taf4b', 'Ltbp1', 'Spred2', 'Cxcl16', 'Maff', 'Rcan1', 'Adnp2', 'Ptrh1', 'Ppp1r15a', 'Plekha4', 'Cldn7', 'Tubb2a', 'Star…	1824	3
Nr1h3	'Sec16b', 'C4b', 'Nr1h3', 'Hsd17b11', 'Gsta3', 'Angptl4', 'Comt', 'Aldh1a1', 'Igf1', 'Apoe', 'Ftl1', 'Man2a1', 'Enpep', 'Dmd', 'Cp', 'Tmem150a', 'Rdh11', 'Ghr', 'Abcd2', 'Sqrdl', 'Alg11', 'Rreb1', 'Acaa2', 'Mttp', 'Hmgcs2', 'Lpl', 'Fabp1', 'Tlcd2', 'Aifm2', 'Mmp19', 'Fam13a', 'Pgm2', 'Slc25a47', 'Ttc36', 'Apoa1', 'Ech1', 'Prkd3', 'St7l', 'C2', 'Mmp11', 'P2rx4', 'H2-Q10', '1700018L02Rik', 'Sema4g'…	1787	3
Jund	'Samd4', 'Dusp1', 'Fosb', 'Ube2b', 'Azin1', 'Errfi1', 'Heg1', 'Josd1', 'Atf3', 'Jun', 'Creb5', 'Fam76a', 'Picalm', 'Insig1', 'Arg2', 'Ube2n', 'Thra', 'Tmem39a', 'Rap1b', 'Relb', 'Pgrmc2', 'Dkk2', 'Tpm4', 'Klf7', 'Maff', 'Csnk1e', 'Ppp2r2d', 'Gabarap', 'Rce1', 'Lrrc8a', 'Igfbp3', 'Sh3gl1', 'Taf4b', 'Klf6', 'Aldh1a2', 'Rbm15b', 'Cdk14', 'Tpd52l2', 'Chpf', 'Camk2n1', 'Bhlhe40', 'Zfp36l1', 'Tpm1', 'F…	1660	3
Mitf	'Slc35a5', 'Ube2q1', 'Picalm', 'Serf2', 'Dhx35', 'Nptn', 'Cln3', 'Mal2', 'Arfgef2', 'Tac1', 'Rragc', 'Slc35b2', 'Brox', 'Actn2', 'Fnip1', 'Mfsd7c', 'Pld3', 'Zfp438', 'Ybx2', 'Cltc', 'Rab3il1', 'Lamp1', 'Slc25a33', 'Atp6v1a', 'Naa50', 'Nnt', 'Mms19', 'Batf3', 'Tmeff2', 'Pdp1', 'AA465934', 'Bloc1s1', 'Usp28', 'Extl2', 'Gns', 'Wls', '0610040J01Rik', 'Sorl1', 'Hsf2', 'Socs5', 'Rab21', 'Fbxl5', 'Nrbp2…	1644	3
Nr2f6	'Ndufa4', 'Ttc36', 'Nr2f6', 'Cox6c', 'Grb7', 'Pipox', 'Hpn', 'Slc25a39', 'Atp5g3', 'Hspa9', 'Ddc', 'Atp5l', 'Aass', 'Slc25a13', 'Suox', 'Chchd10', 'Cpt1a', 'Chdh', 'Stard10', 'Cat', 'Hsd17b4', 'Dhrs4', 'Ephx2', 'Pcca', 'Tmbim6', 'Slc25a15', 'Pafah2', 'Ehhadh', 'Galm', 'Akr7a5', 'Suclg2', 'Acss2', 'Dld', 'Acsl1', 'Acadvl', 'Etfdh', 'Tmem120a', 'Hadha', 'Esrra', 'Rreb1', 'Slc45a3', 'Nr2c1', 'Abat',…	1492	3
Srebf1	'Dolpp1', 'Hsp90b1', 'Mtmr4', 'P4hb', 'Hspa5', 'Rnf181', 'Osbp', 'Mvk', 'Mmab', 'Paip2b', 'Arrdc4', 'Shc1', 'Far1', 'Rrbp1', 'Arntl', 'Tysnd1', 'Fdft1', 'Spsb3', 'Hook1', 'Slc25a42', 'Plcxd2', 'Dcaf11', 'Os9', 'Fdps', 'Hsd17b12', 'F11r', 'Aldh6a1', 'Iqcd', 'Reep6', 'Rabl3', 'Gtf2e1', 'Manf', '5430416N02Rik', 'Lin52', 'Epm2aip1', 'Calr', 'Wbp1', 'Syvn1', 'Kdm4a', 'Nup88', 'Sdf2l1', '0610007P14Rik'…	1480	3
Mafk	'Nfatc1', 'Nr4a2', 'Ccnyl1', 'Spry4', 'Samd4', 'Ube2f', 'Fosb', 'Fbn1', 'Taf4b', 'Gadd45b', 'Hivep2', 'Nrarp', 'Nr4a1', 'Klf4', 'Ell', 'Sirt1', 'Hexim1', 'Zswim6', 'Azin1', 'Rnf19b', 'Jag1', 'Hspa2', 'Med13', 'Egr1', 'Map4k4', 'Golph3', 'Maff', 'Btg1', 'Cnnm4', 'Nrp2', 'Nras', 'Pdpn', 'Ncam1', 'Map3k8', 'Rheb', 'Dyrk1a', 'Chrnb1', 'Errfi1', 'Plk2', 'Foxp4', 'Gabpb1', 'Nfe2l1', 'Per3', 'Pde1c', 'P…	1425	3
Egr1	'Egr1', 'Dusp5', 'Cachd1', 'Map3k12', 'Cryab', 'Pbx1', 'Ints6', 'Fermt2', 'Tcf7l2', 'Sertad2', 'Socs2', 'Bdnf', 'Maml2', 'Wasl', 'Map4k5', 'Vamp2', 'Tmem158', 'Thbs2', 'Nckap5l', 'Lamc1', 'Cbx6', 'Jun', 'Mafb', 'Ctdsp2', 'Phf21a', 'Igfbp5', 'Midn', 'Erf', 'Brd2', 'Col1a1', 'Cadm1', 'Junb', 'Trim8', 'Hic1', 'Glis2', 'Tshz3', 'Hoxc6', 'Fam53c', 'Atxn2', 'Fzd2', 'Pcgf2', 'Nr2f1', 'Zfp36l1', 'Cbx4', …	1340	3
Tead2	'Vcl', 'Sh2b3', 'Lman1', 'Tmem5', 'Znrf3', 'Cyth2', 'Unc13b', 'Tspan17', 'Leprot', 'Prpf40b', 'Hdac3', 'Pcbp3', 'Chd6', 'Mospd1', 'Fhod1', 'Slc9a5', 'Ephb3', 'Klhl26', 'Mapk8', 'Sgk1', 'Pdlim7', 'Deptor', 'Stx6', 'Eepd1', 'Rhbdf2', 'Inpp5a', 'Papolg', 'Tsen34', 'B4galt1', 'Slc1a5', 'Acer2', 'Grasp', 'Ankrd27', 'Tmem158', 'Mnt', 'Rab3a', 'Sntb2', 'Psmd12', 'Zfp319', 'Xpnpep1', 'Sertad1', 'Kdr', 'C…	1308	3
Creb3	'Stx5a', 'Asb3', 'Tmem55b', 'Scfd1', 'Acap2', 'Slc38a5', 'Hps5', 'Gns', 'Phc3', 'Lamp1', 'Srprb', 'Tmem214', 'Zfyve26', 'Arfip1', 'Mapk3', 'Tmem86a', 'Ncald', 'Naglu', 'Tbx3', 'Rragc', 'Lrrc58', 'Slc31a2', 'Slc38a9', 'Cope', 'Spryd3', 'Fam195b', 'Ctns', 'Cyb5d2', 'Copb1', 'Usp48', 'Zmynd8', 'Sept4', 'Yipf3', 'Morf4l1', 'Sdf2', 'Dnajb11', 'Sec23ip', 'Abcd1', 'Arfgap1', 'Ncstn', 'Zc3h3', 'Nagk', 'M…	1276	3
Nfatc4	'Svep1', 'Prrx1', 'Ccdc80', 'Dkk2', 'Trim8', 'Ssbp2', 'Tpm1', 'Il6st', 'Nnat', 'Rftn2', 'Gadd45b', 'Rnf219', 'Il11ra1', 'Pcgf2', 'Fermt2', 'Armcx3', 'Fndc3b', 'Extl3', 'Nr4a2', 'Samd4', 'Cytl1', 'Fzd7', 'Gli3', 'Ccdc88a', 'Tgfb3', 'Lag3', 'Vegfa', 'Cdk14', 'Dlg4', 'Smad3', 'Cbx5', 'Hoxb2', 'Gng11', 'Cul7', 'Armcx6', 'Osmr', 'Dexi', 'Nfib', 'Stambpl1', 'Tpm2', 'Mdga1', 'Smarcd3', 'Igfbp4', 'Snx33'…	1197	3
Bhlhe41	'Aff4', 'Cd164', 'Hspbap1', 'Cry1', 'Stx6', 'Dctn4', 'Bhlhe41', 'Adam10', 'Pld3', 'Crb3', 'Prkar2b', 'Lrfn4', 'Rreb1', 'Trp53inp1', 'Socs5', 'Runx1', 'Fxyd2', 'Ndufa7', 'Galnt3', 'Qtrt1', 'Tjp3', 'Stc2', 'Wsb2', 'Slc5a6', 'Tmem181a', 'Atp13a3', 'Muc1', 'Phc2', 'Ap1m2', 'Arhgef16', 'Dlg1', 'Tmem125', 'Trim39', 'Ctns', 'Shpk', 'Ralgds', 'Mrc1', 'Gas5', 'Cldn7', 'Actr3b', 'Pfkfb3', 'Ceacam1', 'Trim4…	1116	3
Hnf1b	'Fxyd2', 'Hnf1b', 'Myo6', 'Rab3ip', 'Atp1b1', 'Idh2', 'Prr15l', 'Fabp3', 'Pth1r', 'Pcbd1', 'Car5b', 'Abcd3', 'Entpd5', 'Ggt1', 'Ank3', 'Rbm47', 'Ldhb', 'Rnf128', 'Igsf5','Fxyd2', 'Kifc3', 'Cldn10', 'Pcbd1', 'Akr1c19', 'Atp1b1', 'Igsf5', 'Spp1', 'Rbm47', 'Cisd1', 'Prr15l', 'Hoxa10', 'Baiap2l2', 'Adcy6', 'Slc4a2', 'Slc40a1', 'Plekhg3', 'Scml4', 'Hnf1b', 'Stk16', 'Traf4', 'Crb3', 'Egr1', 'Grb7', 'Sm…	957	3
Ppard	'Plekhg3', 'Uchl1', 'Tnks2', 'Sesn2', 'Nt5c2', 'Ahcyl2', 'Cpeb4', 'Plekhh1', 'Sema4g', 'Tnfrsf21', 'Xpr1', 'Lrrc1', 'Sgsm3', 'Ube4a', 'Fam20b', 'Gatad2a', 'Tmem64', 'Ppfibp2', 'Pgap3', 'Rap2b', 'Src', 'Rxra', 'Slc30a1', 'Rnf144b', 'Cmtm4', 'Tmem37', 'Mtmr4', 'Hdgf', 'Rbm47', 'Aim1l', 'Hivep1', 'Myo5c', 'Sh3bgrl2', 'Rhbdf2', 'Alas1', 'Ndrg1', 'Tc2n', 'Nfe2l2', 'Abcc4', 'Atp1a1', 'Adipor2', 'Ctnnb1…	894	3
Grhl1	'Ikzf2', 'Ralbp1', 'Faf1', 'Rab25', 'Eps8l2', 'Ehf', 'Jup', 'Aff4', 'Epha1', 'Stap2', 'Tmem79', 'Cldn4', 'Klc3', 'Tnks1bp1', 'Elovl1', 'Sytl2', 'Fam83h', 'Cdkn2b', 'Tacstd2', 'Endou', 'Appl2', 'Pkp3', 'Ahcyl2', 'Klf5', 'Gdpd3', 'Qars', 'Cds1', 'Hk2', 'Hk1', 'Bag2', 'Shroom3', 'Baz2a', 'Zbtb7a', 'Trappc6a', 'Asprv1', 'Clasp1', 'Hmgn1', 'Otub2', 'Kif5c', 'Ywhaz', 'Fzd6', 'A130010J15Rik', 'Tyro3', '…	892	3
Tbx2	'Tial1', 'Cdk5', 'Ncln', 'Prcc', 'Lamtor2', 'Rpgrip1l', '1110004F10Rik', 'Dync1i2', 'Unk', 'Aamp', 'Pnkd', 'Qtrtd1', 'Zc4h2', 'Snapc3', 'Arv1', 'Fyco1', 'Hspa13', 'Vcpip1', 'Ppp1r12b', 'Slc35b4', 'Pcm1', 'Akirin2', 'Napb', 'Actr1a', 'Calcoco1', 'Itpr1', 'Nutf2', 'Smug1', 'Sdccag8', 'Plekha1', 'Ddx49', 'Zmat5', 'Daam1', 'Pdcd10', 'Edem3', 'Tmem115', 'Fbf1', 'Tmtc3', 'Pacrg', 'Hexim2', 'Srprb', 'Ir…	864	3
Sox10	'Marcksl1', 'Cdc42ep1', 'Ephb3', 'Notch3', 'Pgpep1', 'Plp1', 'Rtkn', 'Dnajb2', 'Myo1b', 'Cdc42ep3', 'Zmiz1', 'Phc2', 'Flna', 'Ralgds', '2610203C20Rik', 'Pcbp4', 'Sox2', 'Serinc2', 'Sema4c', 'Etv6', 'Plekha1', 'Spin1', 'Fgfr1', 'Ngfr', 'Shf', 'Lama5', 'Prss23', 'Rbp1', 'Axin1', 'Cdc42ep4', 'Pfkfb3', 'Hyal2', 'Ttyh1', 'Sdc1', 'Vdr', 'Ptbp2', 'Tle3', 'Ctxn1', 'Hnrnpab', 'Bdnf', 'Amotl1', 'Runx1', 'S…	812	3
Sox11	'Trim8', 'Tmeff1', 'Foxp1', 'Ppp1r16b', 'Dpysl5', 'Kit', 'Hoxc10', 'Meis1', 'Aph1a', 'Hpgd', 'Phlpp1', 'Pcdh1', 'Ace', 'Dnaic1', 'Pitpnc1', 'Hopx', 'Itga3', 'Frmd4a', 'Smad6', 'Pde1c', 'Carhsp1', 'Trib2', 'Bmpr2', 'Smarca2', 'Upp1', 'Tmcc2', 'Casc4', 'Tek', 'St5', 'Tex14', 'Klhl5', 'Hyal2', 'Impdh1', 'Sox11', 'Apln', 'Nhlrc2', 'Prickle1', 'Tbx3', 'Slco2a1', 'Arl4d', 'Nkd1', 'Afap1l1', 'Ifit3', 'T…	809	3
Dbp	'Per3', 'Tef', 'Kcnk2', 'Maml3', 'Svep1', 'Ldb1', 'Per2', 'Osr1', 'Hoxa4', 'Slit2', 'Tiprl', 'Egflam', 'Fblim1', 'Six5', 'Pcgf2', 'Nr1d2', 'Nr1d1', 'Tslp', 'Tns3', 'Dbp', 'Vamp2', 'Wnt2', 'Nexn', 'Slc25a14', '1700001L19Rik', 'Atg10', 'Spon1', 'N6amt1', 'Ddx3y', 'Tmem175', 'Pknox2', 'Myh10', 'Bmp4', 'Rnf10', 'Cirbp', 'Pde5a','Per3', 'Ak4', 'Tubb2b', 'Unc5c', 'Trak1', 'Ddx17', 'Brca1', 'Rbp4', 'Hhi…	708	3
Pparg	'Lipe', 'Pnpla2', 'Etv3', 'Stk10', 'Adamts4', 'Tcf7l2', 'Slc15a3', 'Mal', 'Mgll', 'Rnf144b', 'Sema6d', 'Galnt6', 'Capn5', 'Gmfb', 'Tinagl1', 'Eepd1', 'Sulf2', 'Vwa1', 'D17Wsu92e', 'Slc23a2', 'Adipor2', 'Mast4', 'Rhbdf2', 'Zbtb46', 'Slc6a9', 'Pcdh1', 'Cd36', 'Nrarp', 'Gpr4', 'Myh9', 'Lmo1', 'Acaa1b', 'Prkab1', 'Ybx1', 'Hmga1', 'Ttc7b', 'Trim25', 'Spry4', 'Csf1r', 'Cyth3', 'Fhdc1', 'Ly6i', 'Sdc3', …	679	3
Foxc1	'Nfatc1', 'Zbtb2', 'Srf', 'Fosb', 'Ppp2r2b', 'Zswim6', 'Foxo1', 'Pdk4', 'Plec', 'Prdm16', 'Pitpnc1', 'Med13l', 'Mdm2', 'Inppl1', 'Slc12a2', 'Prrc2a', 'Smoc1', 'Fry', 'Rapgef3', 'Nfat5', 'Crim1', 'Bahcc1', 'Gadd45a', 'Brd2', 'Sirt1', 'Mpped2', 'Pde4b', 'Max', 'Dst', 'Cdkn1c', 'Irx3', 'Midn', 'Hexim1', 'Rnf38', 'Zbtb10', 'Klf10', 'Ell', 'Tshz2', 'Trim47', 'Mras', 'Socs5', 'Sox6', 'Ncam1', 'Rab39b',…	662	3
Tcf7l2	'Sulf2', 'Tcf7l2', 'Svil', 'Il18', 'Arrdc3', 'Tbxas1', 'Ctnnd1', 'Il13ra1', 'Dirc2', 'Dync1h1', 'Mtus1','Gtpbp2', '2200002D01Rik', 'Sdcbp2', 'Heph', 'Tmed10', 'Espn', 'Slc20a1', 'Plec', 'Rtn4', 'Itpkc', 'Anxa1', 'Junb', 'Bag3', 'Pkp3', 'Tac1', 'Lgals3', 'Crk', 'Epha2', 'Slc2a1', 'Ipo5', 'Ssfa2', 'Abhd2', 'Sdc4', 'Ctnnal1', 'Psmd11', 'Ap1s1', 'Atp1b1', 'Mafg', 'Dusp7', 'Gtf2ird1', 'F3', 'Hcfc1r1',…	588	3
Tef	'Abhd11', 'Per2', 'Fam131a', 'Tead1', 'Atp6v0c', 'Ak4', 'BC048403', 'Aktip', 'Dctn4', 'D5Ertd579e', 'Tle3', 'Ube2h', 'Tmem175', 'Nr1d2', 'Csnk1g2', 'Dpm1', 'Trps1', 'Jmy', 'Efr3a', 'Bcl6', 'Sox13', 'Ptprs', 'Galnt11', 'Lyrm1', 'Adarb1', 'Creld1', 'Huwe1', 'Nbr1', 'Pard6a', 'Tnrc18', 'Myl6', 'Per3', 'Por', 'Per1', 'Myh10', 'Trak1', 'Ndufb6', 'Papd7', 'Eif4a2', 'Rab9', 'Zbtb33', 'Zfp523', 'Fgfbp3',…	493	3
Nr2f2	'Lrp4', 'Sort1', 'Tmem176b', 'Heyl', 'Angpt1', 'Gpx4', 'Lpp', 'Cmklr1', 'Slc41a3','Smarcd3', 'Svep1', 'Prrx1', 'Fermt2', 'Eln', 'Epas1', 'Mylip', 'Ccnyl1', 'Tpm1', 'Ace', 'Ccdc80', 'Prdm16', 'Wnt2', 'C1qtnf1', 'Klf2', 'Prelp', 'Prkg1', 'Hic1', 'Aldoa', 'Nbeal1', 'Hoxa10', 'Nfib', 'Hoxa4', 'Tmem150a', 'Slco3a1', 'Per3', 'Ntf3', 'Zfp503', 'Srf', 'Fbn1', 'Ctnna1', 'Nrarp', 'Lims2', 'Igfbp4', 'Amotl2…	445	3
Foxa2	'Fabp1', 'Foxa2', 'Dhcr24', 'Mgst1', 'Slc38a4', 'Apoa1', 'Car3', 'Pigr', 'Agt', 'Rarres1', 'Cdh2', 'Hsd17b2', 'Haao', 'Sec14l2', 'Ppp1r3b', 'Gpt2', 'Gls2', 'Aldh1a7', 'Slc39a8', 'Rbp4', 'Bdh1', 'Acaa1b', 'Slc6a13', 'Zfyve1', 'Insig2', 'Fgd6', 'Egfr', 'Slc25a15', 'Stard10', 'Sec24a', 'Sar1b', 'Crot', 'Nnmt', 'Lgals8', 'Pctp', 'Atp11c', 'Psen2', 'F5', 'Gbe1', 'Slc38a3', 'Zadh2', 'Rab9', 'Cyp7b1', '…	441	3
Egr2	'Per1', 'Rrad', 'Ippk', 'Thbs1', 'Sirt1', 'Maff', 'Klf16', 'Tnc', 'Pdpn', 'Mapre1', 'Id4', 'Gprc5a', 'Hmga2', 'Zfand5', 'Depdc5', '3632451O06Rik', 'Pcf11', 'Brd2', 'Med26', 'Pak4', 'Cx3cl1', 'Rabgef1', 'Mapk6', 'Rbbp7', 'Npy', 'Tnfaip3', 'Jdp2', 'Lrig1', 'Egr1', 'Zc3h12a', 'Srf', 'Trib1','Thbs1', 'Bdnf', 'Zswim4', 'Slc43a1', 'Gem', 'Ccdc6', 'Egr1', 'Angptl4', 'Col1a1', 'Igfbp5', 'Stat5a', 'Nr4a3'…	426	3
Nfatc2	'Cadm1', 'Prrx1', 'Tiam2', 'Tgfb3', 'Nfatc1', 'Twist1', 'Il11', 'Chst11', 'Lin7a', 'Dixdc1', 'Cytl1', 'Scara3', 'Clec11a', 'Ccdc88a', 'Golph3', 'Rspo3', 'Ncam1', 'Cdkn1c', 'Nrk', 'Enkur', 'Trim46', 'Col8a2', '4930539J05Rik', 'Cpe', 'C1qtnf3', 'Sdk2', 'Samd4', 'Ube2f', 'Runx1', 'Tspan6', 'Fgfr3', 'Cnnm4', 'Phtf2', 'Tmem60', 'Mllt6', 'Rcan1', 'Rftn2', 'Ccdc80', 'Bcl6', 'Zfp36l1', 'Gse1', 'Colec12',…	384	3
Srf	'Srf', 'Pkdcc', 'Vcl', 'Tpm1', 'Tnnt2', 'Krt19', 'Klf6', 'Fhl2', 'Myl7', 'Cdc14a', 'Epas1', 'Id4', 'Ptgds', 'Prrc2a', 'Edn1', 'Sh3bgr', 'Bbx', 'AI837181', 'Drap1', 'Lemd2', 'Cd24a', 'Espn', 'Npy', 'Sox2', 'Atp6v1c2', 'Prlr', 'Atp1b1', 'Pde1c', 'Dusp5', 'Egr2', 'Foxp2', 'Kcnk3', 'Arhgap1', 'Dmd', 'Ckm', 'Wisp1', 'Mmp15', 'S100g', 'Adcy6', 'Sspn', 'Ptpn21', 'Acpp', 'Carns1', 'Mapkapk2', 'Cited1', '…	337	3
Msx1	'Fermt2', 'Polr2a', 'Klf2', 'Ubash3b', 'Nfatc1', 'Itga6', 'Ccnyl1', 'Socs2', 'Klf7', 'Nfkbiz', 'Phlpp1', 'Epas1', 'Cdkn1c', 'Penk', 'Bambi', 'Irf1', 'Sin3a', 'Rnf19b', 'Sntb2', 'Lims2', 'Plxna2', 'Rhob', 'Ier5l', 'Sgk1', 'Igfbp3', 'Suz12', 'Eln', 'Calm1', 'Nova1', 'Msx1', 'Nr4a1', 'Nrp1', 'Map4k4', 'Ntf3', 'Gadd45b', 'Gja4', 'Nog', 'Azin1', 'Igfbp4', 'Cdkn2aip', 'Ccnd2', 'Mylip', 'Ace', 'Nrp2', '…	300	3
Hoxc6	'Col5a3', 'Ppp1r1a', 'Irx1', 'Ifi205', 'Hoxc10', 'Baiap2l2', 'Rab6b', 'Hoxc6', 'Arhgap24', 'Hoxb8', 'Tbx15', 'Hoxa9', 'Rsrc1', 'Cd164l2', 'Efhd1', 'Mecom', 'Tanc1', 'Hoxa10', 'Pkdcc', 'Phyhipl', 'Hoxb7', 'Hoxc9', 'Angel1', 'Adcy6', 'Pou3f3','Fosb', 'Svep1', 'Nr4a2', 'Egr1', 'Srf', 'Penk', 'Btbd11', 'Kdm6a', 'Fst', 'Adam12', 'Rspo3', 'Id4', 'Cbx8', 'Peli2', 'Sh3gl1', 'Atf3', 'Reps2', 'Pkdcc', 'Hiv…	274	3
Hoxc10	'Pkdcc', 'Dlat', 'Cd164l2', 'Hoxc6', 'Hoxb8', 'Pth1r', 'Cox4i1', 'Ace', 'Pou3f3', 'Hoxc10', 'Cxxc5', 'Vdr', 'Phyhipl', 'Amot', 'Mapk8ip1', 'Atp1b1', 'Slc16a1', 'Cdkl2', 'Ywhaz', 'Nuak2', 'Ndrg3', 'Acot11', 'Myo5b', 'Aff1', 'Prom1', 'Chchd4', 'Fhit', 'AI314180', 'Fst', 'Plekhg3', 'Tshz1', 'Hoxc9', 'Mapk1ip1l', 'Gas2', 'Gas1', 'Arhgef16', 'Glis2', 'Wdfy3', 'Hoxb7', 'Lsamp', 'Erbb2', 'Sestd1', 'Dapk…	223	3
Hoxb2	'Hoxb2', 'Timp3', 'Tnrc18', 'Col13a1', 'Nt5dc2', 'Arhgef17', 'Hoxa7', 'Hspb2', 'Hoxa5', 'Phc2', 'Inppl1', 'Dnmt3a', 'Morc2a', 'Rere', 'Cryab', 'Spred2', 'Ctbs','Prrx1', 'Hoxa5', 'Ccnyl1', 'Sntb2', 'Mat2a', 'Spry4', 'Tbx2', 'Socs2', 'Prkg1', 'Eln', 'Ace', 'Atxn1', 'Efna1', 'Kdm6a', 'Maff', 'Fst', 'Rspo3', 'Pcsk5', 'Srf', 'Ntf3', 'Cdkn1b', 'Ttc9', 'Hoxb5', 'Neurl1b', 'Igfbp3', 'Slco2a1', 'Aqp3', 'N…	208	3
Nfia	'Nfia', 'Igfbp4', 'Slc39a1', 'Slc29a1', 'Errfi1', 'Klf9', 'Aplp2', 'Notch2', 'Cald1', 'Zbtb20', 'Atxn1', 'Sec63', 'Epha7', 'Rbfox2', 'Ltbp1', 'Hipk3', 'Lrig1', 'Prnp', 'Glce', 'Dnajb4', 'Daam1', 'Slc16a2', 'Tead1', 'Rnf19a', 'Ankrd46', 'Dnajc3', 'Smad5', 'Camk2n1', 'Cachd1', 'Deptor', 'Gabarapl1', 'Plekhf1', 'Ssr3', 'Zfp518b', 'Maged1', 'St5', 'Spry2', 'Gas1', 'Aspn', 'Colec12', 'Sik3', 'Pafah1b2…	183	3
Tead3	'Wtip', 'Ddr1', 'Tmem125', 'Cyr61', 'Smo', 'Fzd7', 'Rhbdf1', 'Smarcd3', 'Ppfibp1', 'Erbb2', 'Trip6', 'Map1lc3a', 'Dlg3', 'Plxnb1', 'Meis2', 'Usp2', 'Cacna1a', 'Csdc2', 'Steap4', 'Angptl4', 'Tead3', 'Otud1', 'Bmpr1a', 'Nr1d1', 'Cblc', 'Maml1', 'Nr2f2', 'Palld', 'P4ha3', 'Ntm', 'Dnajb4', 'Tln1', 'Plekhh3', 'Lrrc41', 'Tyro3', 'Epn2', 'Arhgap32', 'Pfkfb2', 'Metap1d', 'Ptpn3', 'Ptms', 'Dip2c', 'Ptx3',…	182	3
Hoxb5	'Tbx2', 'Hoxa5', 'Limch1', 'Hoxb2', 'Hoxb6', 'Lbh', 'Shroom3','Hoxb7', 'Trim8', 'Ace', 'Tbx2', 'Slco2a1', 'Hoxa5', 'Eln', 'Pan3', 'Kit', 'Hoxb5', 'Patz1', 'Dhrs3', 'Hoxb6', 'Col13a1', 'Meis2', 'Meis1', 'Adamts10', 'Sox11', 'Neurl1b', 'Vgll3', 'Pcsk5', 'Lrp4', 'Plvap', 'Klf4', 'Arl15', 'Hoxa4', 'Vegfa', 'Kcnk3', 'Slc29a1', 'Zfp503', 'Amotl2', 'Smurf2', 'Limch1', 'Ephb4', 'Efnb2', 'Hhip', 'Gja4', '…	171	3
Hoxa5	'Hoxa5', 'Tbx2', 'Amotl2', 'Timp3', 'Mapre2', 'Limch1', 'Adamts10', 'Gnaq', 'Tsc22d1', 'Vgll3', 'Lrp4', 'Hexim1', 'Egflam', 'Sept4', 'Fbxl3','Nfatc1', 'Penk', 'Hoxb7', 'Ace', 'Igfbp3', 'Cadm1', 'Srsf2', 'Atxn1', 'Smarca2', 'Plxna2', 'Klf7', 'Ccnyl1', 'Tbx2', 'Hoxa5', 'Foxp1', 'Baiap2', 'Slco2a1', 'Eln', '1190002N15Rik', 'Kit', 'Hoxb6', 'Hoxa7', '2700060E02Rik', 'Hoxb5', 'Dhrs3', 'Pan3', 'Plvap', …	169	3
Hlf	'Ak4', 'Maf', 'Ces1d', 'Ddc', 'Slc4a4', 'Gatm', 'Tmem106a', 'Hlf','Per3', 'Fbxo3', 'Cdk6', 'Meis1', 'Ncor2', 'Zfp322a', 'Oscp1', 'Rgs18', 'Gcnt2', 'Dhx37', 'Ube2cbp', 'Pank1', 'Map3k7', 'Tmem201', 'Rpp14', 'Armcx6', '1700018L02Rik', 'Irf2bp1', 'Ak4', 'Pck2', 'Peli2', 'Yif1b', '1700112E06Rik', 'Srebf2', 'Ndst1', 'Chst11', 'Mycn', 'Slc22a21', 'Smarca2', 'Dnmt3b', 'Six5', 'Lrrc14', 'Il12a', 'Xpnpep3…	168	3
Ddit3	'Ddit3', 'Syt11', 'Sertad2', 'Per1', 'Gli2','Ddit3', 'Slc7a11', 'S100a9', 'Gramd3', 'Trib1', 'Slpi', 'Rara', 'Per1', 'Polr2a', 'Aqp9', 'Il1b', 'Rnf149', 'Il1rn', 'Osgin1', 'Clec4e', 'Gadd45g', 'Hsd17b11', 'Nrd1', 'Ear2', 'Fgl2', 'Trem1', 'Tnik', 'Lztfl1', 'Sh2b2', 'F630028O10Rik', 'Ubb', 'Lmnb1', 'Maff', 'Osm', 'Chd7', 'Plk3', 'Sh3gl1', 'Hmg20a', 'Abi1', 'Kctd12', 'Sfxn5', 'Dnajb9', 'Rab11fip1', …	151	3
Hoxb7	'Scnn1a', 'Hoxb7', 'Hoxb8', 'Hoxb6', 'Hoxa7', 'S100g', 'Fxyd2', 'Fbxl19', 'Kifc3', 'Ybx2', 'Reps2', 'Senp3', 'Dach1', 'Laptm4b', 'Ppp1r1a', 'Hoxa9', 'Itpr1', 'Ubxn2a', 'Enpp5', 'Phldb2', 'Mfsd11', 'Pbx2', 'Cdk5', 'Acvr1b', 'Dhrs3', 'Stard8', 'Klc2', 'Slc2a9', 'Bahd1', 'Irx3', 'Wnk1', 'Pik3c2a', 'Pou3f3', 'Hoxc6', 'Hipk2', 'Tctn3', 'Ehd3', 'Ralgapb', 'Prom1', 'Slc6a6','Hoxb8', 'E4f1', 'Fosb', 'Epa…	145	3
Nfic	'Nfia', 'Glis2', 'Plod2', 'Laptm4a', 'Slc29a1', 'Rrbp1', 'Tns3', 'St3gal4', 'Iqsec1', 'Timp3', 'Vkorc1', 'Camk2n1', 'Tspo', 'Meis1', 'Ssr3', 'Itgb1', 'Bahcc1', 'Siae', 'Slc12a4', 'Bcl9l', 'Eif4g3', 'Plekha6', 'Chpf2', 'Cacnb1', 'Psd3', 'Lasp1', 'Thra', 'Bloc1s1', 'Pitpnb', 'Uggt2', 'Lamb1', 'Nfil3', 'Hbp1', 'Bicd1', 'Meis2', 'Ankrd39', 'Dnmt3a', 'Khdrbs3', 'Pacsin2', 'Tcta', 'Pnkd', 'Trio', 'Pik3…	143	3
Gata6	'Rbms2', 'Acvr1', 'Aldh1a2', 'Gata6', 'Zfhx3','Gata6', 'Pde5a', 'Nagk', 'Pkdcc', 'Plekha6', 'Csrp2', 'Sqrdl', 'Qsox1', 'Ece1', 'Dap', 'Mecom', 'Epha7', 'Trerf1', 'Arfip1', 'Cldn12', 'Tusc3', 'Galnt7', 'Sec22b', 'Pde3a', 'Cdkn2a', 'Ehbp1', 'Kazald1', 'Rrbp1', 'Tmem218', 'Golgb1', 'Rasef', 'Palb2', 'Stt3b', 'Aldh18a1','Apobec2', 'Myl7', 'Tnnt2', 'Aldh1a1', 'Eln', 'Art4', 'Sh3bgr', 'Fhl2', 'Hand2', …	140	3
Gli1	'Svep1', 'Dtx3', 'Arsb', 'Ncald', 'Add3', 'Inha', 'Cacnb1', 'Ssbp2', 'Slc25a14', 'Gli2', 'Kcnj8', 'Hand2', 'Meis1', 'Runx1t1', 'Col13a1', 'Kcnk2', 'Cryzl1', 'Six5', 'Cadm3', 'Thbs3', 'Kdelr1', 'Pcgf1', 'Dcn', 'Smarca1', 'Fndc1', 'Klhl13', 'Nlgn2', 'Camk2a', 'Slc38a5', 'Snx18', 'Olfml1', 'Hoxa10', 'Tmem181a', 'Ust', 'Mmp19', 'Hspb2', 'C2', 'Sfrp1', 'Nfatc4', 'Meg3', 'Fam20a', 'Fam173b', 'Zfp423', …	130	3
Foxp2	'Foxp2', 'Brd3', 'Paip2b', 'Fbxo32', 'Cldn8', 'Srf', 'H2afv', 'Atp6v1c2', 'Selenbp1', 'Epas1', 'Tbx18', 'Zfp428', 'Ovol2', 'Fam83e', 'Ccng2', 'Fat1', 'Gprc5a', 'Krt19', 'Etv4', 'Wnt6', 'Aldh1a1', 'Klf5', 'Sox2', 'Espn', 'Fam161a', 'Anxa8', 'Cd109', 'Osr2', 'Lman2l', 'Sh3d19', 'Il17re', 'Sftpd', 'Creb3l4', '5330417C22Rik', 'Hspb8', 'Oit1', 'Kif21a', 'Acpp','Foxp2', 'Smtnl2', 'Hand2', 'Ccni', 'Tnmd…	117	3
Hoxa9	'Hoxa7', 'Hoxa9', 'Hoxb8', 'Hoxc9', 'Ncam1', 'Hoxb6', 'Hoxc10', 'Ep300', 'Ctxn1', 'Add3', 'Hoxb7', 'Hspa4', 'Hes1', 'Hoxa10', 'Sh3rf1', 'Alpl', 'Rpap1', 'Plekhg3', 'Spen', 'Scaf11', 'Vangl1', 'Dis3l', 'Phyhipl', 'Akr1b10', 'Ero1l', 'Srcin1', 'Fgd4', 'Ppard', 'Mlec', 'Arhgef10l', 'Enah', 'Pcbp3', 'Hist3h2ba', 'Far1', 'Rasd1', 'Gprc5c', 'Crocc', 'Ubxn2a', 'Plekha7', 'Ybx1', 'Ank3', 'Ermp1', 'Itga6'…	116	3
Hoxa7	'Hoxa5', 'Hoxb2', 'Hoxb7', 'Vldlr', 'Slco3a1', 'Hoxb5', 'Fam193b', 'Hoxb4', 'Zfp503', 'Ckb', 'Rgl1', 'Ift57', 'Hoxb6', 'Scoc', 'Sgms1', 'Hoxa7', 'Unk', '4930402H24Rik', 'Zfp341', 'Ogt', 'Rnf6', 'Nudt2', 'Ppip5k1', 'Slc43a2', 'Lin52', 'Zhx3', 'Npnt','Hoxb7', 'Kctd15', 'Gpsm2', 'Hoxb6', 'Crim1', 'Hoxa10', 'Peli2', 'Lrrc56', 'Hoxa7', 'Ccdc3', 'Hoxa5', 'Hoxa9', 'Mtx2', 'Lhx2', 'Nt5dc2', 'Gm973', 'Pou…	76	3
Pitx2	'Gtf2ird1', 'Pitx2', 'Cish', 'Wnt7b', 'Pitx1', 'Limk2', 'Plek2', 'Fam83d', 'Isl1', 'Rnf10', 'Megf9', 'Tpm2', 'Glo1', 'Mgst3', 'Bdnf', 'Creb3l1', 'Esrp1', 'Igsf9', 'Eml2', 'Krt10','Calml4', 'Slc16a1', 'Slc26a2', 'Pitx1', 'Slc31a1', 'Bdh1', 'Pitx2', 'Cldn7', 'Gtf2ird1', 'Cs', 'Dym', 'Camk1d', 'Aim1l', 'Rangrf', 'Fam83d', 'Isl1', 'Csrp2', 'Ahcyl2', 'Fam109a', 'Erbb2', 'Creb3l1', 'Rfk', 'AA467197', '…	69	3
Rarg	'Rarg', 'Rbms1', 'Plcd1', '2010111I01Rik', 'Anxa2', 'Bambi', 'Klf4', 'Ahnak', 'Etv4', 'Rtn4', 'Tpm4', 'Tmem165', 'Tagln2','Zfp219', 'Tacc2', 'Rarg', 'Nxn', 'Pkp3', 'Rbms1', 'Vangl2', 'Serpinb2', 'Chl1', 'Dtx2', 'Kctd15', 'Ephb6', 'Iffo2', 'Col8a2', 'Lrig3', 'Hopx', 'Ssx2ip', 'Slain2', 'Polr3g', 'Sgk3', 'Samd5', 'Pard6g', 'Crabp1', 'Dcaf4', 'Aim1', 'Fam83g', 'S100a4', 'Btbd11', 'Irf6', 'Bcl11b', '…	60	3
Gli2	'Gli2', 'Dzip1', 'Rab34', 'Lefty1','Rnf165', 'Srpx2', 'Etv4', 'Spats2l', 'Ypel5', 'Foxp2', 'Kremen1', 'Homez', 'Paqr8', 'Egfr', 'Scara3', 'Plekhf1', 'Pdlim2', 'Boc', 'Smoc2', 'Cdon', 'Daam1', 'Gpc3', 'Bmp4','Txlng', 'Gli2', 'Kdelr3', 'Tnni2', 'Tulp3', 'Acta1', 'Sec24d', 'Fam114a1', 'Myadm', 'Sorcs2', 'Nanos3', 'Col1a1', 'Plcd1', 'Tnc'	37	3
Nfat5	'Zswim6', 'Vezf1', 'Tead1', 'Myo1c', 'Dock1', 'Zfp36l1', 'Ptpn14', 'Timp3', 'Gnas', 'Lima1', 'Gnaq', 'Tsc22d2','Samd4b', 'Furin', 'Prdm2', 'Sp2', 'Stx16', '4932438A13Rik', 'Malat1', 'Etv3', 'Cish', 'Xpot','Camk2g', 'Atp2a2', 'Acan', 'Nuak1', 'Igf1r', 'Rock2', 'Hipk3', 'Phactr2', 'Pcnx', 'Spry2'	32	3
Irf7	'Rtp4', 'Isg15', 'Zfp710', 'Irf2', 'Oasl1', 'Ifit3', 'Usp18', 'Rsad2', 'Slc15a3', 'Map3k8', 'Elmo1', 'Ccl5', 'Zbp1', 'Zfp36l1', 'Ccl4', 'Fcgr4', 'Cybb', 'Bst2', 'Ifitm2', 'Meis2', 'Parp14', 'Adamts4', 'B2m', 'Nedd9', 'Alox5ap', 'Cxcl10', 'Dram1', 'Il4i1', 'Dclre1c', 'Clec7a', 'Sgms1', 'Cnksr3', 'Ccnt2', 'Oas2', 'Uba7', 'Cd274', 'Fli1', 'Msr1', 'Zfhx2', 'Gna13', 'Tcirg1', 'Sp100', 'Il15ra', 'Lmo2'…	3516	4
Stat1	'Rtp4', 'Ifit3', 'B2m', 'Usp18', 'Bst2', 'Zbp1', 'Irf2', 'Parp14', 'Cybb', 'Oasl1', 'Ggps1', 'Polr2a', 'Gripap1', 'Cd274', 'Tcirg1', 'Uba7', 'Ccnt2', 'Arhgap30', 'Fli1', 'Dhx29', 'Serp1', 'Ccl5', 'Gsdmd', 'Cd74', 'Rbck1', 'Xaf1', 'H2-K1', 'Tor3a', 'Evl', 'Rab19', 'Oas2', 'Fbxl12', 'H2-K2', 'Fyb', 'Erap1', 'Wars', 'Dclre1c', 'Fam26f', 'Zfp710', 'H2-M3', 'Stx17', 'Nsun6', 'Bbx', 'H2-D1', 'H2-Q6', '…	3516	4
Irf8	'Fcgr2b', 'Tmem206', 'Alox5ap', 'Tagap', 'Elmo1', 'Lpxn', 'Svep1', 'Lsp1', 'Plek', 'Ppp1r16b', 'Cd68', 'Lmo2', 'Arhgap22', 'Samsn1', 'Fcrla', 'Sp100', 'Zfp710', 'Ccl4', 'Lrmp', 'Ncf2', 'Cd74', 'Cfp', 'Pold4', 'Arhgef3', 'Irf2', 'Siglecg', 'Slc15a3', 'Bcl2a1b', 'Bcl2a1a', 'H2-K2', 'Plxnc1', 'Gpr183', 'Arhgap30', 'Dok3', 'Laptm5', 'Bcl2a1d', 'Spn', 'Pla2g15', 'Parp8', 'Tprgl', '5430427O19Rik', 'Arf…	3511	4
Elf1	'Rnf167', 'Rps18', 'Dhx36', 'Eif3g', 'Cdk13', 'Isy1', 'Arpc2', 'Mdm4', 'Kti12', 'Senp7', 'Atg16l1', 'Ippk', 'Stk4', 'Zcchc6', 'Sptlc2', 'Rps6', 'Nipbl', 'Erh', 'Cstf2', 'Pik3r4', 'Daxx', 'Csnk1g1', 'Hnrnpd', 'Zbtb11', 'Fibp', 'Ubr1', 'Fam96b', 'Il2rg', 'Fbxl12', 'Mcm3ap', 'Brf2', 'Rapgef6', 'Xab2', 'Zbtb45', 'Eif2b2', 'Ube2n', 'Ppp4c', 'Mark2', 'Eif3i', 'Zc3h13', 'Ddx21', 'Parg', 'Srsf5', 'Tomm20…	3507	4
Ikzf1	'Tagap', 'Elmo1', 'Usp38', 'Lpxn', 'Lsp1', 'Plek', 'Ppp1r16b', 'Cxcr3', 'Lmo2', 'Arhgap22', 'Fbxo28', 'Rnf5', 'Fcrla', 'Fbxl12', 'Sp100', 'Ccl4', 'Lrmp', 'Ncf2', 'Cd74', 'Lcp2', 'Pold4', 'Arhgef3', 'H2-K2', 'Plxnc1', 'Gpr183', 'Arhgap30', 'Dok3', 'Laptm5', 'Aff3', 'Spn', 'Parp8', '5430427O19Rik', 'Ptpn6', 'Pkn1', 'H2-K1', 'Coro1b', 'Stk4', 'Ino80e', 'Arhgap11a', 'Pik3cg', 'Stap1', 'Nfkbid', 'Psmb…	3500	4
Ets1	'Nr1h2', 'Rnf167', 'Eif3g', 'Isy1', 'Arpc2', 'Kti12', 'Ippk', 'Bcl2l1', 'Stk4', 'Arpc5l', 'Tomm70a', 'Dmap1', 'Sptlc2', 'Nipbl', 'Erh', 'Dpp8', 'Mfap1b', 'Lsm1', 'Gnai3', 'Fbxo28', 'Sco1', 'Daxx', 'Csnk1g1', 'Zbtb11', 'Serp1', 'Ubr1', 'Gemin8', 'Fam96b', 'Il2rg', 'Fbxl12', 'Mfap1a', 'Rapgef6', 'Xab2', 'Eif2b2', 'Gabarapl2', 'Nsun6', 'Usp11', 'Efcab7', 'Dzip3', 'Ss18', 'Fam96a', 'Pik3c3', 'Abcd1',…	3499	4
Fli1	'Nr1h2', 'Arpc2', 'Kti12', 'Atg16l1', 'Epn1', 'Ippk', 'Bcl2l1', 'Hspbp1', 'Zfp410', 'Ywhab', 'Stk4', 'Ap1m1', 'Arpc5l', 'Tomm70a', 'Zcchc6', 'Sfswap', 'Cap1', 'Sptlc2', 'Tbc1d22a', 'Rab11a', 'Nipbl', 'Bin3', 'Dpp8', 'Mfap1b', 'Cstf2', 'Pik3r4', 'Gnai3', 'Psmd6', 'Sco1', 'Daxx', 'Dhx38', 'Sass6', 'Eif3l', 'Srbd1', 'Gemin8', 'Il2rg', 'Wdr76', 'Rnf185', 'Rapgef6', 'Xab2', 'Nsun6', 'Usp11', 'Zfp105',…	3495	4
E2f4	'Prr11', 'Agfg2', 'Gsk3b', 'Kcnab2', 'Narf', 'Ankrd54', 'Golph3l', 'Hist1h3c', 'Chek2', 'Iffo1', 'Cdc6', 'E2f8', 'Cdc23', 'Snrpa', 'Son', 'Ints7', 'Dtl', 'Rpa2', 'Cdca2', 'Fam46c', 'Tomm40', 'Fam117a', 'Aurka', 'Pnrc2', 'Cstf1', 'Sp2', 'Smad2', 'Rhof', 'Top2a', '2810006K23Rik', 'Dnajb11', 'Tbccd1', 'Hist1h3a', 'Iqcd', 'Ube2c', 'Cnnm2', 'Lin52', 'Arhgap33', 'Recql', '0610007P14Rik', 'Cdk1', 'Terf1…	3493	4
Irf5	'Trim8', 'Zfp710', 'Irf2', 'Oasl1', 'Usp18', 'Slc15a3', 'Zbp1', 'Stap1', '5430427O19Rik', 'Rasgrp3', 'Ccl4', 'Fcgr4', 'Cybb', 'Bst2', 'Parp14', 'Nedd9', 'Alox5ap', 'Actb', 'Dnajc14', 'Il4i1', 'Ptpn6', 'Dclre1c', 'Hivep1', 'Clec7a', 'Ccnt2', 'Oas2', 'Rab19', 'Arhgap25', 'Cxcr5', 'Cd274', 'Baz2b', 'Plxnc1', 'Fli1', 'Msr1', 'Arhgef6', 'Eif3k', 'Grap', 'Serp1', 'Dapp1', 'Gripap1', 'Tcirg1', 'March1',…	3067	4
Taf1	'Tlk1', 'Ddx6', 'Nipbl', 'Zc3h4', 'Arid1a', 'Cnot7', 'Vps37a', 'Zmiz1', 'Ddx17', 'Pum2', 'Ccar1', 'Zzef1', 'Pja2', 'Scaf11', 'Erlec1', 'Tab2', 'Rc3h2', 'Lin54', 'Ubtf', 'Pdzd8', 'Htatsf1', 'Cggbp1', 'Rprd1b', 'Nup153', 'Cdk13', 'Ehd3', 'Gtf2a1', 'Snap29', 'Ppig', 'Pds5a', 'Arid1b', 'Hnrnpul1', 'Uso1', 'Sfswap', 'Hnrnpa3', 'Cdk5rap2', 'Clock', 'Usp47', 'Hnrnpa2b1', 'Hcfc1', 'Usp34', 'Cdc25b', 'Gnp…	3064	4
E2f2	'Mcm6', 'E2f2', 'E2f1', 'E2f8', 'Cdc6', 'Mcm3', 'Pola1', 'Mcm8', 'Cdc25a', 'Rbl1', 'Topbp1', 'Uhrf1', 'Prkdc', 'Dtl', 'Mcm4', 'Cdk1', 'Hist1h2bm', 'Hells', 'Lig1', 'Srsf2', 'Mcm5', 'Srsf1', 'Rpa2', 'Mbnl3', 'Wee1', 'Atad2', 'Myb', 'Smc3', 'Ranbp1', 'H2afv', 'Nfatc2ip', 'Cep57', 'Casp8ap2', 'Ppp1cc', 'Chaf1a', 'Fam76b', 'Pin1', 'Rbbp4', 'Kntc1', 'Arhgap11a', 'Agfg2', 'Serbp1', 'Zfp367', 'Hnrnpa3',…	2873	4
Elf4	'Cog3', 'Atg16l1', 'Vps52', 'Ppp4c', 'Fli1', 'Bin3', 'Lypla2', 'Fbxo28', 'Pik3cg', 'Arpc2', 'Tsc22d4', 'Klhl6', 'Arfip1', 'Cbll1', 'Tbkbp1', 'Tmbim6', 'Gabpa', 'Trip4', 'Lcp2', 'Slc25a46', 'Kctd2', 'Ywhab', 'Cap1', 'Zfp384', 'Cln3', 'Pex11a', 'Topbp1', '4930453N24Rik', 'Elac2', 'Zbtb12', 'Spn', 'Utp3', 'Fcgr4', 'Pou2f2', 'Tfam', 'Ino80b', 'Ipo8', 'Arhgap25', 'Sco1', 'Gdap2', 'Wdr3', 'Mtmr4', 'Cnn…	2873	4
Irf9	'Rtp4', 'Isg15', 'Irf2', 'Oasl1', 'Ifit3', 'Usp18', 'Rsad2', 'Map3k8', 'Zbp1', 'Ggps1', 'Rasgrp3', 'Zfp36l1', 'Bst2', 'Ifitm2', 'Meis2', 'Vgll4', 'Ppp1r16b', 'Parp14', 'Itpkb', 'B2m', 'Cxcl10', 'Zwilch', 'Actb', 'Armcx6', 'Ccnt2', 'Oas2', 'Uba7', 'Sox6', 'Cd274', 'Baz2b', 'Dnpep', 'Fli1', 'Ctbp2', 'Gng11', 'Sdpr', '2810403A07Rik', 'Grap', 'Gripap1', 'Tcirg1', 'Sp100', 'Lmo2', 'Rac1', 'Frmd4a', 'I…	2855	4
Hcfc1	'Tnpo3', 'Arfip1', 'Mettl6', 'Gabpa', 'Trip4', 'Fibp', 'Ywhab', 'Tssc4', 'Dhx36', 'Vps52', 'Gga1', 'Zranb2', 'Usf1', 'Cbll1', 'Zcchc6', 'Ccz1', 'Slc25a46', 'Ptrh2', 'Nipbl', 'Nmnat1', 'Dpp8', 'Zfp668', 'Mtmr9', 'Parg', 'Ubox5', 'Sart3', 'Nudt5', 'Cdc123', 'Prkcsh', 'Hspa4', 'Klhl20', 'Mgat1', 'Phrf1', 'Mlec', 'Mastl', 'Senp7', 'Yme1l1', 'Psmd6', 'Zfc3h1', 'Vps13b', 'Topbp1', 'Snrnp200', 'Tor1b', …	2654	4
Irf2	'Rtp4', 'Ifit3', '1700056E22Rik', 'Rbck1', 'Ggps1', 'Rab19', 'Irf2', 'Tcirg1', 'Bst2', 'Cd274', 'Zbp1', 'Uba7', 'Polr2a', 'Bcl2a1b', 'Plxnc1', 'B2m', 'Cd74', 'Flt3l', 'Dram1', 'Ccnt2', 'Atoh8', 'Xaf1', 'Erap1', 'Dnajc14', 'H2-K1', 'Rsf1', 'Gsdmd', 'H2-K2', 'Gripap1', 'Vgll4', 'Il12a', 'Grap', 'Fli1', 'Arhgap30', '5430427O19Rik', 'Nckap1l', 'Rasgrp3', 'H2-Q6', 'Fam26f', 'Elmo1', 'Il15', 'Ms4a1', '…	2549	4
Spib	'Zfp668', 'Tnpo3', 'Pik3r4', 'Epn1', 'Arpc2', 'Mgat1', 'Gpsm3', 'Sept1', 'Trip4', 'Gas5', 'Slx1b', 'Bola2', 'C2cd3', 'Dok3', 'Lzic', 'Rgs14', 'Ptpn1', 'Cdk13', 'Rrnad1', 'Arpc5l', '1700084E18Rik', 'Arhgap27', 'Mtmr4', 'Ap1m1', 'Chtf8', 'Dgkz', 'Lpxn', 'Srsf5', 'Dapp1', 'Zkscan6', 'Ccr7', 'Irf2', 'Fem1a', 'Arf6', 'Uvrag', 'Nol6', 'Zranb3', 'Erp44', 'Trim35', 'Kdm3b', 'Rab11fip2', 'Arhgef3', 'Fcgr2…	2500	4
E2f1	'Mcm6', 'E2f1', 'E2f8', 'Cdc6', 'Mcm3', 'Pola1', 'Trmt6', 'Mcm8', 'Cdc25a', 'Rbl1', 'Topbp1', 'Uhrf1', 'Dtl', 'Mcm4', 'Cdk1', 'Hist1h2bm', 'Hells', 'Lig1', 'Srsf2', 'Mcm5', 'Cox8a', 'Srsf1', 'Paqr4', 'Rpa2', 'Mbnl3', 'Wee1', 'Atad2', 'Myb', 'Smc3', 'Ranbp1', 'H2afv', 'Uhrf2', 'Casp8ap2', 'Ppp1cc', 'Chaf1a', 'Map3k7', 'Fam76b', 'Kntc1', 'Arhgap11a', 'Zfp367', 'Hnrnpa3', 'Ung', 'Slbp', 'Gins3', 'Ss…	2468	4
Rel	'Nfkb2', 'Tnfaip3', 'Nfkbia', 'Map3k8', 'Relb', 'Rel', 'Gpbp1', 'Neurl3', 'Cxcl2', 'Gngt2', 'Ifngr2', 'Xpo1', 'Ccl4', 'Rps19', '5430427O19Rik', 'Hivep1', 'Myo1e', 'Dennd4a', 'Tank', 'Slc38a1', 'Abi1', 'Cd74', 'H2-Aa', 'H2-D1', 'Tagap', 'Jak2', 'Rilpl2', 'Il1r2', 'Camk1d', 'Rrad', 'Il1b', 'Notch2', 'Nfkbie', 'Ebi3', 'Ccl17', 'Rgs1', 'Ccl9', 'Cd40', 'Eif5b', 'Pou2f1', 'Fam69a', 'Ankrd33b', 'Stab1',…	2163	4
Nfkb2	'Nfkbia', 'Nfkb2', 'Cxcr5', 'Adamts4', 'Gpbp1', 'Cxcl9', 'Rel', 'Gngt2', 'H2-Aa', 'Tank', 'Map3k8', 'Cd74', 'Osmr', 'Tnfaip3', 'H2-K2', 'Itga5', 'Neurl3', 'Tnip1', 'Cd40', 'Il6', 'Tgif1', 'Ncf2', 'H2-K1', 'Csf1', 'Casp4', 'Psme2', 'H2-D1', 'Isyna1', 'Stat5a', 'Stip1', '2410006H16Rik', 'Sfmbt1', 'P2ry10', 'Socs5', 'Palld', 'Bcl3', 'Slc39a14', 'Hivep2', 'Dclk1', 'Sri', 'Gripap1', 'Sirt1', 'Myo1c', …	1894	4
Tfdp1	'E2f8', 'E2f1', 'Msh5', 'Pola1', 'Ncapg', 'Stag1', 'Kntc1', 'Tcf19', 'Rbl1', 'Lta4h', 'Hist1h1e', 'Hist1h2bm', 'Hist1h2bj', 'Hist1h2ag', 'Cdc25a', 'Hist1h3c', 'Zw10', 'Xkr5', 'Hist1h3g', 'Zfp438', 'Cntln', 'E2f7', 'Hist1h2bb', 'Iqgap3', 'Hist1h2an', 'Mki67', 'Dtl', 'Ccne2', 'Rfc5', 'Arhgap19', 'Pgp', 'Hist1h1b', 'Lrr1', 'BC030867', 'Chaf1a', 'Zfp711', 'Smc2', 'Tesk2', 'Brip1', 'Kif11', 'Hist1h4h'…	1862	4
Relb	'Nfkb2', 'Nfkbia', 'Gpbp1', 'Icam1', 'Gngt2', 'Relb', 'Stat5a', 'Ltb', 'Cxcl1', 'Rel', 'Gt(ROSA)26Sor', 'Cxcl2', 'Tank', 'Irf2', 'Cfl2', 'Smoc1', 'Tnip1', 'Cd74', 'Dnaja1', 'Ccl5', 'Neurl3', 'Hivep2', 'Ankhd1', 'Irf1', 'Ifngr2', 'Casp4', 'Stx11', 'Ebf1', 'Actn1', 'Tpbg', 'Fas', 'Ptprj', 'Gabpb1', 'C2', 'H2-Q6', 'Map4k4', 'Psme2', 'Rps19', 'Rnf31', 'Myo1c', 'Wac', 'Zfp687', 'Nek8', 'H2-Aa', 'Man2b…	1706	4
Pml	'Tnpo3', 'Gabpa', 'Cdk13', 'Atg16l1', 'Arpc5l', 'Tssc4', 'Pik3r4', 'Syvn1', 'Usf1', 'Rnf167', 'Slx1b', 'Zfp513', 'Eif3g', 'Eif2b2', 'Usp38', 'Daxx', 'Ttpal', 'Zfp768', 'Ino80b', 'Ap1s2', 'Zfp653', 'Rgl2', 'Klhl20', 'Mgat1', 'Rnf185', 'Lrrc8a', 'Yme1l1', 'Trim35', '1810024B03Rik', 'Kctd10', 'Serp1', 'Hars', 'Pigt', 'Usp30', 'Edc4', 'Sfswap', 'Bmp2k', 'Nsun6', 'C2cd3', 'Smu1', 'Sh3bp5l', 'Acin1', '…	1555	4
Runx3	'Fmnl1', 'Sh2d3c', 'Batf', 'Cytip', 'Cd160', 'Cd28', 'Cln3', 'Ctsw', 'Tspan32', 'Rgs1', 'Itpkb', 'Xcl1', 'Gpr171', 'Def6', 'Ptpn22', 'Tfam', 'Runx3', 'Iqgap2', 'Lpxn', 'Arid3b', 'Gpr132', 'Rnf43', 'AI504432', 'Sdf2l1', 'Bcar3', 'Kcnip3', 'Elmo2', 'Txk', 'Arhgap15', 'Mllt3', 'Ccl3', 'Akap13', 'Arl6ip5', 'Ly9', 'Was', 'Hsd11b1', 'Ccl4', 'Chn2', 'Mthfd1l', 'Lck', 'Rac2', 'Dgkz', 'Tmsb10', 'Dok2', 'A…	1500	4
Nfyb	'Prr11', 'Agfg2', 'Cdkn3', 'Ankrd54', 'Hist1h3c', 'Chek2', 'Ccng2', 'Cdc6', 'E2f8', 'Rnf181', 'Ints7', 'Dtl', 'Vcp', 'Rpa2', 'Cdca2', 'Gtf2e1', 'Hmgb2', 'Cyp39a1', 'Aurka', 'Pnrc2', 'Cstf1', 'Sp2', 'Top2a', '2810006K23Rik', 'Dnajb11', 'Tbccd1', 'Hist1h3a', 'Iqcd', 'Ttf2', 'Ube2c', 'Prpf40a', 'Arhgap33', 'H2afx', 'Recql', 'Cdk1', 'Terf1', 'Ppp6r3', 'Rbm14', 'Hist1h3g', 'Ppp2r5c', 'Hist2h2be', 'Sti…	1480	4
Kdm5a	'Cdk13', 'Dhx36', 'Pyroxd1', 'Csnk1g1', 'Cbll1', 'Srsf5', 'Nipbl', 'Polr2h', 'Xrn2', 'Zcchc6', 'Snrnp200', 'Parg', 'Mdm4', 'Chd2', 'Acin1', '2700097O09Rik', 'Zc3h13', 'Vps13b', 'Pigt', 'C2cd3', 'Cdc37l1', 'Topbp1', 'Pik3c3', '2210408I21Rik', 'Rabgap1', 'Edc4', 'Cradd', 'Foxred1', 'Cstf3', 'Mea1', 'Senp7', 'Strn', 'Zfp597', 'Mon1b', 'Tnks', 'Atm', 'Npat', 'Usp38', '2410004B18Rik', 'Ahsa1', 'Rb1cc1…	1402	4
Cebpe	'Lcn2', 'Camp', 'Hmgn2', 'Dram1', 'Cdc42se1', 'Gys1', 'Lmo4', 'S100a8', 'Trib1', 'Aldh3b1', 'Rhob', 'Nr2f1', 'Asns', 'Olr1', 'Ncam1', 'Flot1', 'Rgs18', 'Mmp8', 'Mmp9', 'Hk3', 'Cybb', 'Slpi', 'Actn1', 'F630028O10Rik', 'Pilrb1', 'Clec12a', 'Mapk14', 'Mxd1', 'Trem3', 'Anp32b', 'Phactr2', 'Vav3', 'Nadk', 'B430306N03Rik', 'Igsf6', 'Cdca2', 'Prr11', 'Clec4e', 'Tesk2', 'Ffar2', 'Trem1', 'S100a9', 'Tmem1…	1342	4
Gabpa	'Vps52', 'Dhx36', 'Hspbp1', 'Sfswap', 'Map3k7', 'Ercc3', 'Slc39a9', 'Dpp8', 'C2cd3', 'Actr6', 'Dhx38', 'Csnk1g1', '8430429K09Rik', 'Dzip3', 'Hccs', 'Hspa4', 'Uba6', 'Mon1b', 'Mtx3', 'Ipo7', 'Uspl1', 'Nek9', 'Chuk', 'Gabpa', 'Eif2s3x', 'Nup155', 'Ubox5', 'Zranb2', 'Ogg1', 'Zbtb12', 'Mcm8', 'Ints1', 'Ppig', 'Zkscan5', 'Hnrnpa0', 'Shoc2', 'Abcb7', 'Zfp830', 'Hirip3', 'Tbrg4', 'Zranb3', 'Zfp568', 'Ug…	1327	4
Elf2	'Dhx36', 'Mtmr9', 'Srbd1', 'Hcfc1', 'Shoc2', 'Sco1', 'Zcchc6', 'Pigm', 'Parg', 'Zranb2', 'Nipbl', 'Strn', 'Hnrnpc', 'Vps13b', 'Rnf185', 'Rfx3', 'Tnks', 'Zc3h13', 'Ccdc9', 'Sf3b2', 'Zfp384', 'Dync1li1', 'Thap1', 'Sugt1', 'Tmem161b', 'Zfc3h1', 'Dhx38', 'Klhl28', 'Taf7', 'Ppil3', 'Fam179b', 'Pik3c3', 'Cggbp1', 'Ddx50', 'Eif5a2', 'Rnf214', 'Dnaic1', 'Sp3', 'Ap1s2', 'Prpf6', 'Zbtb11', 'Krit1', 'Mak16'…	1297	4
Usf1	'Ubap2l', 'Tmem55b', 'Fam118b', 'Zfp62', 'Nagpa', 'Coro1b', 'Thrap3', 'Ostm1', 'Ccdc115', 'Nae1', 'Tor3a', '4933434E20Rik', 'Ube2q1', 'Kdm4c', 'Vps33a', 'Rpusd4', 'Synrg', '1110059E24Rik', 'Fam192a', 'Hps3', 'Commd8', 'Vps16', 'Taf6l', 'Akap10', 'Git2', 'Capza2', 'Taf8', 'Slc35a5', 'Neurl2', 'Ctsa', 'Zfp292', 'Nsmce2', 'Vps26a', 'Gigyf1', 'Pop7', 'Dvl2', 'Hnrnph2', 'Ptch1', 'Epc1', 'Dhx35', 'Orai…	1230	4
Trp53	'Banp', 'Fbxo46', '1110004F10Rik', 'Zfp444', 'Snapc3', 'Gtf2h4', 'Phf23', 'Actr1a', 'Nop14', 'Ddx23', 'Cwc22', 'Bub3', 'Ahsa1', 'Lmnb2', 'Pde6d', 'Arid4b', 'Wdr12', 'Rps27a', 'Clp1', 'Vcpip1', 'Hscb', 'Chek2', 'Sf3b2', 'Chchd3', 'Ddx49', 'Abi1', 'Arv1', 'Akirin2', 'Zfp277', 'Spcs2', 'Pa2g4', 'Srrm2', '9130401M01Rik', 'Ints9', '2210016L21Rik', 'Hirip3', 'Ino80e', 'Serbp1', 'Abcf2', 'Ube2n', 'Men1'…	1116	4
Usf2	'Amdhd2', 'Fam134a', 'Tmem55b', 'Atg3', 'Dvl2', 'Neurl2', 'Slc35a5', 'Ube2q1', 'Mfsd1', 'Fam118b', 'Serf2', 'Dhx35', 'Mcoln1', 'Cuta', 'Atp6v1h', 'Vps33a', 'Snx2', 'Uvrag', 'Tbcel', 'Orai2', 'Slc38a7', 'Cry1', 'Bhlhe41', 'Bloc1s3', 'Gtf2h1', 'Scamp3', 'Mfsd7c', 'Pias4', 'Pld3', 'Zfp438', 'Rspry1', 'Ubxn1', 'Bmp2k', 'Foxm1', '1110059E24Rik', 'Lztfl1', 'Plcg2', 'Prkar2b', 'Gnb2', 'Dnajc16', 'Khk', …	1106	4
Elk4	'Dhx36', 'Cdk13', 'Mdm4', 'Arfip1', 'Pyroxd1', 'Zcchc6', 'Nipbl', 'Dpp8', 'Mfap1b', 'Cstf2', 'Usp30', 'Zbtb11', 'Srbd1', 'Fbxl12', 'Mcm3ap', 'Pigm', 'Pik3c3', 'Ascc2', 'Zc3h13', 'Parg', 'Eif4ebp2', 'Hspa4', 'Topbp1', 'Uba6', 'Tfb1m', 'Smug1', 'Sf3b2', 'Ipo7', 'Nek9', 'Prpf3', 'Naa35', 'Ankhd1', 'Cdc37l1', 'Mtif2', 'Tnks', 'Nup155', 'Zbtb12', 'Mcm8', 'Gm12191', 'Fbxo32', 'Noc3l', 'Rpl34', 'Chd2', …	1061	4
Nr2c2	'Arfip1', 'Pyroxd1', 'Cog3', 'Dhx36', 'Slc25a46', 'Ppp1r16a', 'Slc39a9', 'Zfp105', 'Dpp8', 'Mlec', 'Yme1l1', 'Vps13b', 'Snrnp200', 'Smug1', 'Aak1', 'Golga1', 'Zer1', '2210408I21Rik', 'Tnks', 'Med6', 'Synrg', 'Cnot10', 'Nudt22', 'Prkacb', 'Psme4', 'Alkbh3', 'Rab11fip2', 'Aftph', 'Tram2', 'Hcfc1', 'Mon1b', 'Rb1cc1', 'Mcm3ap', 'Edem3', 'Anapc4', 'Krit1', 'Kctd2', 'Atp5h', 'Atm', 'Npat', 'Uspl1', 'Dh…	1055	4
Mxi1	'Picalm', 'Ube2b', 'Fam134a', 'Hnrnph2', 'Mfsd1', 'Atp6v0b', 'Dusp1', 'Wwp2', 'Cln3', 'Brox', 'Atp6v0d1', 'Osbpl8', 'Phc3', 'Stx4a', 'Ube2h', 'Rab5a', 'Ctns', 'Zbtb40', 'Tbcel', 'Brdt', 'Braf', 'Tom1l2', 'Bnip3l', 'Mff', 'Slc31a2', 'Fbxo33', 'Mbd5', 'Gtf2a1', 'Rab3il1', 'Chn2', 'Fam117a', 'Lin54', 'Slc43a1', 'Atp6v1a', 'Dazap2', 'Lmnb1', 'Dnajc16', 'Depdc1a', 'Mfhas1', 'Sc5d', 'Eif5a2', 'Trim25',…	1037	4
Sin3a	'Nr1h2', 'Csnk1g1', 'Fibp', 'Slc39a9', 'Sfswap', 'Srbd1', 'Cbll1', 'Edc4', 'Usp11', 'Hcfc1', 'Topbp1', 'Yme1l1', 'Trappc8', 'Nek9', 'Uspl1', 'D030056L22Rik', 'Synrg', 'Taf2', 'Usp38', 'Cstf3', 'Adam17', 'Fbxo32', '1700084E18Rik', 'Uggt1', 'Shoc2', 'Exoc1', 'Mbd1', 'Serp2', 'C330027C09Rik', 'Zfp180', 'Eif5a2', 'Slc25a14', '4632415L05Rik', 'Spata5', 'Nup214', 'Tpp2', 'Atoh8', '1110037F02Rik', 'Cep1…	1033	4
Etv3	'Lcp2', 'Tbkbp1', 'Pik3r5', 'Ly96', 'Bcl2a1b', 'Btf3', 'Bcl2a1a', 'Bcl2a1d', 'Wdr26', 'Tjp2', 'Cd68', 'Nfat5', 'Cd14', 'Gdf15', 'Samsn1', 'Ccr7', 'Arhgap27', 'Gpr65', 'Baz1a', 'Tmem206', 'Sh3bp2', 'Zfp710', 'Srgap1', 'Git1', 'Ythdc1', 'Foxp1', 'Arpc2', 'Zc3h10', 'Trerf1', 'Agpat4', 'Madd', 'Fbxo11', 'Laptm5', 'Dennd4b', 'Lima1', 'Slc9a9', 'Rara', 'Lpxn', 'Nfkbid', 'Mapk1ip1l', 'St3gal1', 'Ms4a7',…	979	4
E2f7	'Mcm3', 'E2f8', 'Mcm6', 'Casp8ap2', 'Ranbp1', 'Mcm4', 'Zbtb12', 'H2afv', 'Lig1', 'Uhrf1', 'Ssrp1', 'Hells', 'E2f1', 'Zfp367', 'Mxd3', 'Topbp1', 'Pola1', 'Atad2', 'Sin3a', 'Gins2', 'Ncapg', 'Stag1', 'Suz12', 'Srsf2', 'Cdc6', 'Camta1', 'Kntc1', 'Mcm8', 'Hist1h4d', 'Tcf19', 'Rbl1', 'Cchcr1', 'Mdc1', 'Ybx1', 'Lta4h', 'Gabpb1', 'Hist1h1e', 'Baz1b', 'Plekho2', 'Donson', 'E2f3', 'Wee1', 'Mcm5', 'Gnai3',…	976	4
Yy1	'Hcfc1', 'Cdk5rap2', 'Zfc3h1', 'Rbm25', 'Phf8', 'Luc7l3', 'Ptpn4', 'Pip4k2b', 'Map3k4', 'Npm1', 'Fiz1', 'Map2k5', 'Rps6ka3', 'Zzef1', 'Dido1', 'Srrm2', 'Naa15', 'Sart3', 'Baz1b', 'Stag1', 'Usp34', 'Brd4', 'Htatsf1', 'Rps29', 'Zfp644', 'Casc3', 'Cstf2t', 'Bptf', 'R3hdm1', 'Sugt1', 'Fbxl18', 'Rps27', 'Ndufs2', 'Zmym4', 'Ylpm1', 'Nucks1', 'Rock1', 'Mff', 'Hnrnpul1', 'Snrpa', 'Zbtb11', 'Rmi1', 'Zbtb3…	924	4
E2f6	'Rprd1b', 'Angpt1', 'Hnrnpul1', 'Kcnk3', 'Slc9a5', 'Ctdspl2', 'Hnrnpa2b1', 'Gfra1', 'Cherp', 'Phf6', 'Cdc6', 'Baz1b', 'Zfp217', 'Srsf4', 'Arhgap20', 'Ipo7', 'Rfwd3', 'Bub3', 'Zfp644', 'Slc2a4', 'Sin3a', 'Pcbp1', 'Stag1', 'Zw10', 'Apoo', 'Ubr7', 'Pdp1', 'Fam76a', 'Atp2a2', 'Phtf1', 'Hist1h2ag', 'Cul1', 'Homer1', 'Ehbp1', 'Camta1', 'Tpcn1', 'Npat', 'Brpf3', 'Shc1', 'Ppp2r5d', 'Appl1', 'Ttll5', 'Zfp…	915	4
Setdb1	'Ncln', 'Prcc', 'Zcchc8', 'Dync1i2', 'Snx27', '4632427E13Rik', 'Nedd8', 'Vcpip1', 'Sel1l', 'Pcm1', 'Smug1', 'Ddx23', 'Cc2d1a', 'Rnaseh2a', 'Cbll1', 'Rab1b', 'Trpc4ap', 'Snx16', 'Gtpbp8', 'Katnal1', 'Ctu1', 'Tmub1', 'Ipo7', '2610001J05Rik', 'Erp44', 'Lcmt1', 'BC003331', 'Mtm1', 'Mrpl42', 'Cdc40', 'Azi2', 'Psmc3', 'Zfp91', 'Atp5g1', 'Tssc4', 'Thyn1', 'Lcorl', 'Spcs2', 'Zfp189', 'Snx14', 'Enox2', 'T…	781	4
Eomes	'Tmbim6', 'Nr1h2', 'Ppig', 'Wdr26', 'Arf3', 'Fbxo28', 'Ss18', 'Tm9sf3', 'Il2rg', 'Arfip1', '4930453N24Rik', 'Daxx', 'Eif4e2', 'Rad54l2', 'Gabarapl2', 'Arpc2', 'Mdh1', 'Lcp2', 'Rock1', 'Lsm1', 'Ppp4c', 'Sptlc2', 'B3gat3', 'Eif5a2', 'Fam173a', 'Rer1', 'Ywhab', 'Zfp27', 'Zkscan5', 'Cradd', 'Mrps18c', 'Sept1', 'Gga1', 'Stk4', 'Hcst', 'Bcap31', 'Dnajc14', 'Trappc8', 'Psenen', 'Xcl1', 'Mea1', 'Prkacb',…	696	4
Nfe2	'Amdhd2', 'Gla', 'Atg3', 'Ube2b', 'Slc35a5', 'Picalm', 'Serf2', 'Atp6v0b', 'Gabarap', 'Cln3', 'Kdm6a', 'Orai2', 'H2afz', 'March8', 'Atp6v0d1', 'Hps3', 'Osbpl8', 'Bloc1s3', 'Slc43a1', 'Adam10', 'Mfsd7c', 'Mafg', 'Arpc5', 'Prdx6', 'Anln', 'Rab3il1', 'Lamp1', '2810408I11Rik', 'Ip6k1', 'Bnip3l', 'Plcg2', 'Prkar2b', 'Gnb2', 'Ypel5', '6430548M08Rik', 'Zfp217', 'Rara', 'Dleu2', 'Dusp1', 'Xpnpep1', 'Daza…	695	4
Ep300	'Cdk13', 'Zcchc6', 'Dpp8', 'Senp7', 'Vps13b', 'Snrnp200', 'Mcm3ap', 'Tnks', 'Ipo7', 'Uhmk1', 'Zzef1', 'Zfp518a', 'Zfyve16', 'Zfp60', 'Lcorl', 'Kdm5c', 'Pcm1', 'Gcc2', 'Ppip5k2', 'Zmynd8', 'Dennd1b', 'Vcpip1', 'Pik3cg', 'Hcfc1', 'Utp14a', 'Uggt1', 'Anapc4', 'Eif4ebp2', 'Setdb1', 'Tlk1', 'Mbd5', 'Ralgapb', 'Abcb7', 'Ikbkap', 'Ate1', 'Birc6','Tnpo3', 'Csnk1g1', 'Cdk13', 'Epn1', 'Dnajb9', 'Syvn1', 'P…	676	4
Nr3c1	'Son', 'Atp5sl', 'Ip6k1', 'Baz1b', 'Pip4k2b', 'Btrc', 'Tnrc6b', 'Ube3a', 'Stag1', 'Phf8', 'Zzef1', 'Atf1', 'E430018J23Rik', 'Pias1', 'Zc3h4', 'Epn2', 'Gpbp1l1', 'Gopc', 'Tnks2', 'Trappc8', 'Dido1', 'Ddx17', 'Caml', 'Cuedc2', 'Cggbp1', 'Pds5b', 'Tab2', 'Osbpl11', 'Phactr4', 'Malat1', 'Wasf2', 'Mtmr10', 'Asxl1', 'Skap2', 'Zfp606', 'Pum2', 'Mtss1', 'Acvr2b', 'Necap1', 'Rock1', 'Zfp644', 'Slc25a19', …	664	4
Irf3	'Prr11', 'Tomm40', 'Unk', 'Mtmr4', 'Leng1', 'Cnot3', 'Golph3l', 'Spag7', 'Mlh1', 'Cdca2', 'Cep57', 'Txnip', 'Actl6a', 'Slc2a8', 'Zbtb5', 'Derl2', 'Ppp1r7', 'E2f8', 'Ccne1', 'Camta1', 'Armc1', 'Hist1h3c', 'Dnm2', 'Hist1h2bb', 'Hmgb1', '1110059E24Rik', 'Elp4', 'Iffo1', 'Mrps18b', 'Dnajb5', 'Aimp2', 'Zmynd8', 'Ggct', 'Gart', 'Pcsk4', 'Rab8a', 'Cdc45', 'Pik3ip1', 'Prr12', 'Rnf6', 'Cnn3', 'Kdm4a', 'Gt…	653	4
Ctcf	'Arid1a', 'Ctcf', 'Hnrnpd', 'Phip', 'Fam53b', 'Hmgb1', 'Mllt10', 'Scaf11', 'Nipbl', 'Ubtf', 'Lsm14a', 'Nr2c2', 'Ubap2l', 'Rprd2', 'Baz2a', 'Sephs1', 'Fbxw7', 'Zc3h4', 'Pds5a', 'Rest', 'Xpo1', 'Rnf220', 'Phf12', 'Ddx42', 'Sbno1', 'Srrm2', 'Wbp4', 'Nkrf', 'Pip4k2b', 'Nsd1', 'Pds5b', 'Pdik1l', 'Ppp3cb', 'Zfp800', 'Rfx7', 'Yy1', 'Phrf1', 'Ube2q1', 'Zfp143', 'Cnot6l', 'Mycbp2', 'Atf7ip', 'Letm2', 'Cel…	651	4
Gfi1	'Prr11', '4930427A07Rik', 'Plk1', 'Hist1h1b', 'Ect2', 'Top2a', 'Ubb', 'Hist1h3a', 'Ncapd2', 'Kcnab2', 'Ung', 'Trim45', 'Med21', 'Recql', 'Msh2', 'Thy1', 'Pif1', 'Racgap1', 'Hist1h3g', 'Hmgb2', 'Med30', 'Ppwd1', 'H2afx', 'Rpa3', 'Mzt1', 'Mki67', 'Calm2', 'Lgals1', 'Rpa2', 'Depdc1a', 'Katnb1', 'Rorc', 'Hist1h2ai', 'Phf6', 'Abhd8', 'Phkg2', 'Dusp10', 'Ndufv3', 'Msh6', 'Psmc3ip', 'Tdrkh', 'Hmgb1', 'P…	537	4
Nfya	'Prr11', 'Agfg2', 'Hnrnpul1', 'Cdc23', 'Rps6ka5', 'Ints7', 'Sp2', 'Arhgap33', 'Kpna4', 'Tle4', 'Stil', 'Tcerg1', 'Pms2', 'Kif18b', 'Dnd1', 'Agpat5', 'Srsf2', 'Brd8', 'Ncapd2', 'Txndc16', 'Zfp526', 'Ppil1', 'Zswim3', 'Usp1', 'Vash2', 'Recql5', 'Rbm15', 'Nfkb2', 'Fam72a', 'Ubp1', 'Rpain', 'Hsp90b1', 'Stx5a', 'Mapk7', 'Arntl', 'Txlna', 'Cit', 'Hist1h2bp', 'Gas2l3', 'Hist1h2bj', 'Rasa4', 'Cox6a2', 'A…	528	4
Rest	'A430005L14Rik', 'Rbm25', 'Cdk5rap2', 'Lsm14a', 'Sept7', 'Chfr', 'Ncdn', 'Thap2', 'Zfc3h1', 'Luc7l3', 'Zfp318', 'Sart3', 'Klhl15', 'Exoc7', 'Gltscr2', 'Fuz', 'Zfp688', 'Baz1b', 'Srrm2', 'Arid4a', 'Son', 'Nsf', 'Phf12', 'Rufy3', 'Pigv', 'S100pbp', 'Trim8', 'Nrf1', 'Mtf2', 'Atp6v0c', 'Gopc', 'Zfp764', 'Bptf', 'Dido1', 'Upf3b', 'Htatsf1', 'Prpf38b', 'Dhps', 'R3hdm1', 'Zfp36l2', 'Pias1', 'Baz1a', 'Tm…	496	4
Gtf2b	'H3f3b', 'Pgp', 'Gsk3b', 'Ilf2', 'Pin1', 'Golph3l', 'Shc1', 'Spsb3', 'Dnajb11', 'Recql', 'Fam72a', 'Dnm2', 'Rpain', 'Ccng2', 'Sdf2l1', 'Bahcc1', 'Maea', 'Kdm4a', 'Pms2', 'Ppp1r7', 'Cnpy3', 'Gtf2e1', 'Ficd', 'Pxmp4', 'Yipf4', 'Ppp1r10', 'Asb7', 'Slc25a28', 'Rmnd5a', 'Smad2', 'Tspyl2', 'Xpo1', 'Hmgb1', '2610318N02Rik', 'Ogg1', 'Ercc8', 'Trafd1', 'Rpusd1', 'Anp32a', 'Hexim1', 'Pabpn1', 'Calm2', 'H2a…	462	4
Elk1	'Cog3', 'Ywhab', 'Mbd1', '8430429K09Rik', 'Efcab7', '4930453N24Rik', 'Sh3bp5l', 'Arcn1', 'Tasp1', 'Pafah1b2', 'Ogg1', 'Lemd3', 'Ino80e', 'Lrrc51', 'Elac2', 'Necap1', 'Stk11ip', 'Hif1an', '2810002D19Rik', '2810403A07Rik', 'Nrk', 'Gm527', 'Wdpcp', 'Asb3', 'Appl1', 'Nsun5', 'Prkdc', 'Fam172a', 'Cdk7', 'Tab3', 'Msl2', '2810021J22Rik', 'Ovca2', 'Tatdn1', 'Cd180', 'St7l', 'Atf7', 'Nup35', 'Matn4', 'Tub…	457	4
Cebpz	'Ddx27', 'Ubtf', 'Cnot1', 'Hnrnpc', 'Nol6', 'Usp4', 'Angptl4', 'Ints3', 'Hspa4', 'Ankhd1', 'Ddx42', 'Gpbp1', '1700008J07Rik', 'Ep300', 'Cse1l', 'Ccdc9', 'Dnmt3b', 'Mdm4', 'Arhgap27', 'Mettl16', 'Naa25', 'Pxn', 'Ddit4', 'Heatr3', 'Setd2', 'Maoa', 'Hmox2', 'Jarid2', 'Srsf3', 'Pif1', 'Upf2', 'Myh9', 'Mospd3', 'Zc3h18', 'Msl2', 'Sbno1', 'Zfhx2', 'Sp2', 'Zfp507', 'Stag2', 'Cdk17', 'Otub1', 'Grb2', 'Pr…	425	4
Bdp1	'Upf2', 'N4bp2', 'Zbtb7a', 'Ino80d', 'Purb', 'Gpbp1', 'Mga', 'Hspa4', 'R3hdm2', 'Vprbp', 'Srrm1', 'Baz1b', 'Gmeb1', 'Gatad2a', 'Ap1g1', 'Eif4g3', 'Ddx23', 'Eif4enif1', 'Bptf', 'Ankhd1', 'Bcl2l1', 'Zfp260', 'Cep250', 'Ddx27', 'Smarcad1', 'Wasf2', 'Pogz', 'Polr2a', 'Macf1', 'Arid4b', 'Cdk12', 'Taok1', 'Ccdc9', 'Phactr4', 'Stag2', 'Srsf3', 'Rbm5', 'Mdm4', 'Cnot6', 'Spen', 'Matr3', 'Pafah1b1', 'Rai1'…	389	4
Arid3a	'Tsc22d4', 'Camp', 'Lims1', 'Acap2', 'Mctp1', 'Bin3', 'Hmgn2', 'Clec10a', 'Rnase6', 'Zfp710', 'Cd68', 'Ncf2', 'Ncf4', 'Nedd9', 'B430306N03Rik', 'Cxcr2', 'Lcorl', 'Sp3', 'Arhgef6', 'Ffar2', 'Pik3cg', 'Tnni2', 'Itgal', 'Dapp1', 'Sash3', 'Sept1', 'Rac2', 'Samsn1', 'Vav1', 'Arhgap30', 'Lrmp', 'Gpsm3', 'Fam96a', 'Rhog', 'Spn', 'Rffl', 'Rreb1', 'Fcrla', 'Fam193b', 'Nr4a3', 'Wdfy4', 'Siglece', 'Tnfaip8l…	387	4
Batf	'Fosb', 'Vps37b', 'Rfx1', 'Dok1', 'Dok2', 'Heca', 'Nup153', 'Mxd1', 'Ccl4', 'Rps29', 'Map1lc3a', 'Btg1', 'Dusp10', 'Rapgef2', 'Flrt3', 'Taf4b', 'Got1', 'Chd2', 'Cdc42se1', 'Rpl9', 'Crem', 'Cdk2ap2', 'Pitx2', 'Arih2', 'Tnfaip3', 'Ubn1', 'Myl6', 'Rpl13a', 'Ak8', 'Rbp4', 'Lrrfip1', 'Nfkb2', 'Nr4a2', 'Runx1', 'Rplp2', 'Relb', 'Lmbr1l', 'Etv3', 'Cxcl16', 'Bcl2a1b', 'Fbxo33', 'Slamf9', 'Rab8b', 'Runx3'…	358	4
Sp3	'Bola2', 'Ccng2', 'Msh5', 'Sertad3', 'Hist1h4d', 'Mnt', 'Irf2', 'Tnks', 'Zeb2', 'Fgf13', 'Epc1', 'Sdccag8', 'Stag1', 'Rbm28', 'Hnrnpul1', 'Tex2', 'Oxr1', 'Ywhab', 'Calcoco1', 'Coro2a', 'Wdr44', 'Mkln1', 'Ern1', 'Usp15', 'Fmr1', 'Nipbl', 'Sin3a', 'Thoc2', 'Sf3b4', 'Ing1', 'Cep120', 'Gtpbp2', 'Sesn2', 'Cep57l1', 'Mis12', 'Atf7ip', 'Med30', 'Top2b', 'Polr3gl', 'Spen', 'Casp8ap2', 'Trip4', 'Tom1', 'B…	351	4
Sp1	'Sp1', 'Prpf8', 'Eif2ak4', 'Mga', 'Zfp597', 'Dicer1', 'Ccnk', 'Lcorl', 'Zmym2', 'Ppp4r1l-ps', 'Zfp217', 'Rc3h2','Sh2b3', 'Radil', 'Tmem87b', 'Zhx1', 'Sec16a', 'Axin1', 'Cirbp', 'Fchsd1', 'Hdac3', 'AU022252', 'Ctnnbip1', 'Siae', 'Rtf1', 'Lrig2', 'Apeh', 'Cib1', '1110008P14Rik', 'Scyl2', 'Mnt', 'Sntb2', 'Psmd12', 'Smg1', 'Zfand5', 'Afg3l2', 'Cap1', 'Slc2a4', 'Bsdc1', 'Pnpla2', 'Kctd6', 'Otud5', 'Ph…	305	4
Mecp2	'Alkbh6', 'Zfp27', 'Zfp282', 'Phc2', 'Rbm15', 'Rpl34','Fibp', 'Wdyhv1', 'Edc4', 'Nr6a1', 'Ubr1', 'Fam188a', 'Edem3', 'Psme3', 'Plxnb1', 'Fbxo32', 'Golga1', 'Mark3', 'Gcn1l1', 'Lztr1', 'Spred2', 'Cacna1a', 'Rbbp6', 'Dsn1', 'Hcfc1', 'Tmed8', 'Stx18', 'Lrrc47', 'Dab2ip', 'Ppil2', 'Jarid2', 'Ubn2', 'Mettl6', 'Zer1', 'Camta1', 'Fbxw7', 'Fbxw8', 'Yipf2', 'Ino80e', 'G3bp2', 'Lcmt1', 'Kdm2b', 'Pih1d2', '…	299	4
Rara	'Fcgr4', 'Rap2c', 'Nckap1l', 'Lcp2', 'Mctp1', 'Laptm5', 'Pik3r5', 'Vwf', 'Mefv', 'Tlr4', 'Csf3r', 'Plaur', 'Siglece', 'Tmem51', 'Pilrb1', 'Dock2', 'Ms4a6b', 'Fcer1g', 'Tbxas1', 'M6pr', 'Nedd9', 'Bcl2a1b', 'Agpat4', 'Nlrx1', 'Ost4', 'Cd14', 'Ehd4', 'Map3k5', 'Rpl34', 'Fcgr1', 'Rnf31', 'Frmd4a', 'Sirpa', 'B430306N03Rik', 'Tbkbp1', 'Cln3', 'Adcy3', 'Rpl34-ps1', 'Prkch', 'Ncf2', 'Zfp513', 'Alox5ap', …	288	4
Gmeb2	'Ubap2l', 'Brd4', 'Pura', 'Ccdc28a', 'Ahr', 'E4f1', 'Foxred1', '1700084E18Rik', 'Gzf1', 'Pafah1b1', 'Zfp335', 'Abce1', 'Dnaja3', 'Api5', 'Prpf38a', 'Hdac9', 'Smndc1', 'Stk11', 'Abt1', 'Phf6', 'Zfp110', 'Helz', 'Atg16l1', 'Spag4', 'Noc4l', 'Ddx51', 'Tial1', 'Baz2b', 'Trp53bp1', 'Unc5c', 'Rnps1', 'Amd1', 'Ppargc1b', 'Cry1', 'Lin54', 'Nat10', 'Nolc1', 'Zbtb5', 'Cbwd1', 'Apc', 'Dmtf1', 'Wee1', 'Mast4…	258	4
Mef2d	'Mef2d', 'Cecr2', 'Arid3a', 'Plekhg1', 'Fhl3', 'Lipt2', 'P2rx7', 'Apobec2', 'Nr4a3', 'Foxj2', 'Naif1', 'Chst1', 'Sufu', 'Mphosph9', 'Pou2f2', 'Gpr155', 'Uxs1', 'Dyrk2', 'Sp2', 'Gtf3c4', 'Spata1','Mef2d', 'Bcl9l', 'Wdr82', 'Med13', 'Endou', 'Kdm6a', 'Tbl1x', 'Nedd4l', 'Ncoa5','Pik3cb', 'Trim8', 'R3hdm2', 'Zfp521', 'Itpkb', 'Ubtf', 'Ep300', 'Mef2d', 'Spen', 'Zbtb7a', 'Qrich1', 'Mdm4', 'Stx16', 'Mam…	239	4
Sp4	'Zfhx2', 'Inhbb', 'Ddx17', 'Rbm27', 'Ythdc1', 'Mepce', 'Sin3a', 'Cdk12', 'Herc1', 'Chd2', 'Epc1', 'Zfp800', 'Ino80', 'Nipbl', 'Chd3', 'Mex3a', 'Ankrd12', 'Fam109b', 'Rprd2', 'Cnot4', 'Rfx3', 'Arid1a', 'Baz2b', 'Rsf1', 'Wdr44', 'Syncrip', 'Wnk1', 'Tle4', 'Atf7ip', 'Rock1', 'Hist4h4', 'Gpatch8', 'Zmym2', 'Gnl3l', 'Kntc1', 'Zfx', 'Taf1', 'Shprh', 'Cdk19', 'Atm', 'Npat', 'Cdc14a', 'Stag2', 'Numa1', '…	223	4
Stat5a	'Stat5a', 'Stat5b', 'Zfp664', 'Amz2', 'Satb1', 'Bhlhe41', 'Neto2', 'Odc1', 'Ube2j2', 'Tnip1', 'Batf', 'Tmem86a', 'Pcgf5', 'Vps37b', 'Mlph','Rab13', 'Bcl6', 'Tle3', 'Kdm3a', 'Cnot4', 'Ino80b', 'Etv6', 'Stat5a', 'Mbtd1', 'BC005537', 'Zfp286', 'Icam1', 'Maff', 'Ada', 'Muc1', 'Tead3', 'Wipf1', 'Nup153', 'Rpf2', 'Lmnb1', 'Anks1', 'Nr1h2', 'Dbp', 'Scnm1', 'Med29', 'Dnaja1', 'Vps53', 'Pars2', 'Rps27a', …	204	4
Pou2af1	'Cd79b', 'Foxp1', 'Pold4', 'Vpreb3', 'Blnk', 'H2-Ob', 'Fcrla', 'Cd22', 'Cxcr5', 'Pou2f1', 'Egln2', 'Cd180', 'Mef2d', 'Csk', 'Prkcb', 'Rel', 'Ptpn6', 'Bcl11a', 'Itpr3', 'Cables2', 'Hdac9', 'Lyn', 'Ebf1', 'Polm', 'Nol9', 'St6gal1', 'Grk6', 'Mef2c', 'Nsf', 'Ralgps2', 'Rest', 'Lgmn', 'Hmga1', 'Dok3', 'Arhgap25', 'Spib', 'Cdc25b', 'Foxn3', 'Aff3', 'Lrmp', 'Atp2a3', 'Zbtb5', 'Ppm1l', 'Cd55', 'Mgrn1', '…	183	4
Gmeb1	'Ddx17', 'Epc2', 'Pard6a', 'Nudt3', 'Ndc80', 'Srrm2', 'Lekr1', '4930452B06Rik', 'Rtf1', 'Hnrnpu', 'Mettl4', 'Brd4', '4931428F04Rik', 'Ppp6c', 'Crtc1', 'R3hdm1', 'Cand2', 'Naif1', 'Sp3', 'Zfp516', 'Bcorl1', 'Sik2', 'Nras', 'Txnl4b', 'Slc25a14', 'Tmem175', 'Mesdc1', 'Casc3', 'Racgap1', 'Xpo1', 'Pafah1b1', 'Spin1', 'Rfx1', 'Srsf1', 'Mbtd1', 'Spry2', 'Gramd1c', 'Ppig', 'Rabepk', 'Cenpc1', 'Rnf6', 'Fb…	138	4
Stat5b	'Stat5a', 'Stat5b', 'Tbc1d4', 'Lrig1', 'Rara', 'Dusp5', 'Satb1', 'Dip2c', 'Fosl2', 'Rnf19a', 'Socs1', 'Tpt1', 'Fsd1l', 'Batf', 'Pcgf5', '5730508B09Rik', 'Ikzf2', 'Zfp592', 'Orai1', 'Rnf7', 'Prkch', 'Odc1', 'Tnfrsf9', 'Amz2', 'Fas', 'Neto2', 'Elovl6', 'Pja1', 'Tox','Cd4', 'Cd247', 'Stat5b', 'Txk', 'Skap1', 'Bcl11b', 'Phospho2', 'Det1', 'Zfp260', 'Efr3a', 'Camkk1', 'H13', 'Vamp1', 'Itk', 'Dusp10', …	119	4
Stat6	'Arhgap25', 'Stat6', 'Cdipt', 'Alox5ap', 'Pik3r5', 'Apobr', 'Pan3', 'C1qa', 'Fcgr4', 'Cybb', 'Fcer1g', 'Rpl34', 'Klhl28', 'Plek', 'Plekhg1', 'Dok3', 'Grb2', '6530402F18Rik', 'Cd2', 'Ncf2', 'Bcl2a1b', 'Aph1a', 'Il1rn', 'Bcl2a1a', 'Dock2', 'Lcp2', 'Atxn7l3', 'Nckap1l', 'Fbxo28', 'Dr1', 'Pi4kb', 'Zfp710', 'M6pr', 'Bcl2a1d', 'Was', 'Nfam1', 'Kcnk6', 'Rpl34-ps1', 'Irf2', 'Tmem181a', 'Ffar2', 'Rab19', …	108	4
Lef1	'Satb1', 'Bcl11b', 'Cd247', 'Lef1', 'Skap1', 'Tox', 'Dusp10', 'Cd28', 'Gtf2i', 'Itk', 'Fyb', 'Zfp281', 'Cbx4', 'Mllt3', 'Sfmbt2', 'Rnf138', 'Stat5b', 'Galnt6', 'Ldb1', 'Kcnmb4', 'Scml4', 'Lcp2', 'Sesn3', 'Sla2', 'Slain1', 'Sh2d1a', '1110034G24Rik', 'Tcf7', 'Peli1', 'Gm11346', 'Tspyl4', 'Itpkb', 'Cdipt', 'Ntrk3', 'Gata3', 'Klf3', 'Nlk', 'Ccnd2', 'Ptpn4', 'Mtap', 'Rcan3', 'Usp3', 'Phf6', 'Dapl1','A…	93	4
Rxrb	'Gm12191', 'Rxrb', 'Scamp2', 'Adck2', 'Zfp362', 'Mavs', 'Txndc11', 'B3gntl1', 'Kars', 'Zfp335', 'Ctu1', 'Alg8', 'Mks1','B330016D10Rik', 'Spen', 'Nr2c2', 'Ankrd11', 'Rxrb', 'Zfp286', 'BC003965', 'Picalm', 'Exog', 'Zfp668','Mbtd1', 'Dnajb5', 'Srd5a3', 'Casp9', 'Rxrb', 'Foxk1', 'Lemd2', 'Nhsl1', 'Rnf145', 'Cdk12', 'Etl4', 'Utp14b', 'Snw1', 'Abcg1', 'Ece2', 'Nfkbie', 'Fasn', 'Myh11', 'Palld', 'Mcoln1…	73	4
Tcf12	'Ilf3', 'Ubn1', 'Ssr1', 'Cbx6', 'Trpm7', 'Zzz3', 'Dnmt3a', 'Mbtd1', 'Ubap2', 'Fmr1', 'Slc43a1', 'Brdt', 'Bptf', 'Lztfl1', 'Gpr19', 'Pkn2', 'Ptbp1', 'Tbcel', 'Actn1', 'Fam195b', 'Atf2', 'Krtcap2', 'Eif1b', 'Pak3', 'Dtx3', 'Ypel5', 'Klhl22', 'Hnrnph3', 'Eef2k', 'Fam168b', 'Aldh18a1', 'Nme2', 'Mxd4', 'Parp6', 'Fam76a', 'Cbx5', 'Cdk20', 'Cdv3', 'Cad', 'Aspscr1', 'Ube4b', 'Chd4', 'Hhip', 'Srek1', 'Zbt…	72	4
Foxp1	'Foxp1', 'Cd55', 'Cd79b', 'Mef2c', 'Pou2af1', 'S1pr1', 'Ms4a1', 'Ebf1', 'Fam43a', 'Tbx3', 'Sipa1', 'Mbnl1', 'Fli1', 'Rasgef1b', 'Rab30', 'Cbx4', 'Plekhm1', 'Pkig', 'Rnf145', 'Phip', 'Rasgrp3', 'Cyth1', 'Bin1', 'Tec', 'Trib2', 'Ralgps2', 'Klhl24', 'Pou2f1', 'Chd7', 'Sox11', 'Reep1', 'Trim7', 'Plekho1', 'Btk', 'Dennd5b', 'Tmcc2', 'Tmem100', 'Slc12a6', 'Cbx7', 'Crbn', 'Khnyn', 'Sema3f', 'Cdk13', 'St…	64	4
Tcf7	'Satb1', 'Bcl11b', 'Cd247', 'Lef1', 'Skap1', 'Tox', 'Dusp10', 'Cd28', 'Itk', 'Fyb', 'Sla2', 'Sh2d1a', 'Tcf7', 'Peli1', 'Cd4', 'Il7r', 'Prkcq', 'Cd96','Satb1', 'Bcl11b', 'Cd247', 'Ssbp2', 'Gata3', 'Lef1', 'Skap1', 'Tox', 'Cd28', 'Itk', 'Sla2', 'Sh2d1a', 'Tcf7', 'Prkcq', 'Cd4', 'Znrf3', 'Ccr9','Lef1', 'Tcf7', 'Nebl', 'Bcl11b', 'Il7r', 'Cd4', 'Sh2d1a', 'Prkcq', 'Satb1', 'Sept1', 'Ccr9'	46	4
Hsf1	'Jmjd6', 'Kctd21', '2210016L21Rik', 'Zfp628', 'Actr3b', 'Zfp777', 'Gtf2b', 'Wdr59', 'Cdkal1', 'Rpl34', 'Naa25','Kptn', 'Ano1', 'St13', 'Tomm40l', 'Dync1i2', 'Bub3', 'Invs', 'Zfp62', 'Mmp13', 'Spata1', 'A430005L14Rik','Klhl26', 'Pip5k1b', 'Aldh1a3', 'Zw10', 'Lnpep', 'Sfmbt2', 'Ssbp1', 'Pag1', 'Rad52', 'Dbr1', '5430427O19Rik', 'Cars2', 'BC017158', 'Sik2', 'Kif16b'	37	4
Patz1	'Orc4', 'Rbx1', 'Zfp687', 'Kdm4b', 'Ubr7', 'Ndufaf3', 'Ccdc61', 'Numa1', 'Lman2l', 'Xpo1','Nlk', 'Fig4', 'Zfp319', 'Tbc1d17', 'Lin52', 'Zfp219', 'Tmub2', 'Isca2', 'Dgcr2', 'Brd7', 'Spata24', 'Klhdc3', 'Cbfa2t2','Bahd1', 'Patz1', 'Sertad3'	26	4
Gata2	'Ss18', 'Zfp697', 'Rasgrp3', 'Mpo', 'Tbkbp1', 'Grap', 'Kti12', 'Tsg101', 'Zfp410', 'Prkacb', 'Nr1h2', 'Rac1', 'Rasip1', 'Arhgap31', 'Plvap', 'Arhgef3', 'Tmem71', 'Zfp105', 'Ctnna1', 'Eaf1', 'Lrg1', 'Rgs3', 'Pls3', 'Klhl20', 'Arhgap27', 'Elmo1', 'Daxx', 'Ippk', 'Tjp2', 'Caskin2', 'Ushbp1', 'Tmem204', 'Bcl2l1', 'Mmrn2', 'Kifc3', 'Atg16l1', 'Nedd9', 'Rnf31', 'Hspbp1', 'Rgl2', 'Gga1', 'Robo4', 'Rab11…	2315	5
Tal1	'Lmo2', 'Epor', 'Klf1', 'Sox17', 'Plvap', 'Nos3', 'Myct1', 'Mgll', 'Egfl7', 'Hemgn', 'Cdh5', 'Arhgap31', 'Pcdh17', 'Emcn', 'Cd93', 'Herc1', 'Pcp4l1', 'Car1', 'Lpar6', 'Stab1', 'Sez6l2', 'Arrb1', 'Stmn2', 'Cmpk2', 'Fryl', 'Cpox', 'Slc43a1', 'Pcyt1b', 'Vwf', 'Alas2', 'Mkl2', 'Icam2', 'Itga2b', 'Rnf123', 'Nrp1', 'Rffl', 'Sdpr', 'Cbfa2t3', 'Stox2', 'Lyve1', 'Edn1', 'Apbb2', 'Tspan2', 'Cdh13', 'Znfx1'…	771	5
Sox2	'Elf3', 'Atp6v1c2', 'Sox2', 'Isl1', 'Casz1', 'Ehf', 'Foxp2', 'Irx2', '2010300C02Rik', 'Plp2', 'Eya2', 'Zfp428', '2900060B14Rik', 'Btbd11', 'Pmel', 'Nr6a1', 'Gtf2ird1', 'Gprc5a', 'Tuft1', 'Acpp', 'Celf4', 'Nr3c1', 'Srf', 'Aldh1a1', 'Notch1', 'Pdlim1', 'Tiam1', 'Gna14', 'Krt19', 'Dcxr', 'Atp1b1', 'Rnd3', 'Gsto1', 'Iffo2', 'Slc15a2', 'Ngfr', 'Clip4', 'Ndufa4l2', 'Hap1', 'Calm3', 'Fbxo32','Acsbg1', '…	769	5
Taf7	'Tbcc', 'Cdkn2aip', 'Kitl', 'Epas1', 'Srsf2', 'Sgk1', 'Klf7', 'Ddx5', 'Lims2', 'Spry4', 'Col13a1', 'Ehd1', 'Ccnyl1', 'Gabpb1', 'Adamts1', 'Sez6l2', 'Tspan13', 'Mapre1', 'Calm1', 'Gch1', 'Prelid2', 'Ppp1r10', 'Elf1', 'Chrnb1', 'Fli1', 'Flt1', 'Nasp', 'Stambpl1', 'Ppfibp1', 'Arid3a', 'Icam1', 'Smad6', 'Itga6', 'Ptprg', 'Gdf15', 'Mgll', 'Rgs16', 'Car8', 'Prkd2', 'Tnf', 'Srsf7', 'H3f3b', 'Ddit4', 'Pl…	427	5
Tead4	'Tspan13', 'Nrarp', 'Tnfrsf23', 'Rac1', 'Cd36', 'Tinagl1', 'Cdkn2a', 'Tead4', '4921507P07Rik', 'Kbtbd2', 'Nus1', 'Tmem88', 'N4bp3', 'Efna1', 'Samd5', 'Tcf15', 'Dok4', 'Cav2', 'Spns2', 'Scyl2', 'Ehd1','Tpm1', 'Tspan13', 'Sgk1', 'Bmpr2', 'Ctnna1', 'Tmem88', 'Amotl2', 'Sympk', 'Trim8', 'Kti12', 'Lmo7', 'Atxn1', 'Dusp6', 'Cyr61', 'Msrb3', 'Ablim1', 'Calm1', 'Upp1', 'Wwc2', 'Fam171a2', 'Ppfibp1', 'Klf…	333	5
Klf1	'Blvrb', 'Iqcd', 'Itsn1', 'Tpcn1', 'Cryzl1', 'Apeh', 'Cast', 'Lpcat3', 'Nmnat3', 'Ypel5', 'Eif2ak1', 'Atp1b2', 'Bard1', 'Micall2', 'Bsdc1', 'Cnnm2', 'D17Wsu92e', 'Mospd1', 'Slc2a4', 'Smarca5', 'E2f8', 'March2', 'Tmem60', 'Gabarapl2', 'Psip1', 'Orc6', 'Xpnpep1', 'Stx2', 'Urod', 'Afg3l2', 'Leprot', 'Tfdp2', 'Isca2', 'Cited4', 'Rfx2', 'Pitrm1', 'Kntc1', 'Cad', 'Chchd7', 'Zc3h13', 'Mrps36', 'Tarsl2',…	263	5
Foxo3	'Hbp1', '1600020E01Rik', 'Foxo4', 'Ube2h', 'Yipf4', 'Isg20', 'Narf', 'Snca', 'Foxo3', 'Tbcel', 'BC052040', 'Xpo7', 'Tfdp2', 'Trim23', 'Taf4b', 'Ccne2', 'C1qtnf3', 'Riok3', 'Gm11346', 'Acbd7', 'Rffl', 'Pogz', 'Orc2', 'Kif3c', 'E2f7', '2610301B20Rik', 'Grap2', 'Hexim2', 'Zfand6', 'Inhba', 'Tmcc2', 'Pitrm1', 'C330018D20Rik', 'Smox', 'Usp53', 'Akap7', 'Hmga2', 'Bcorl1', 'Ccndbp1', 'Tspyl1', 'Cdkn2a',…	220	5
Atf7	'Btbd9', 'Nudt18', 'Sclt1', 'Lrrc14', 'Ddx51', 'Bdp1', 'Stx5a', 'Sap30bp', 'Uba6', 'Ctu2', 'D330041H03Rik', 'Pogz', 'Ppil4', 'Stx4a', 'Nol10', 'S1pr2', 'Pard6a', 'Cbwd1', 'Taf11', 'Srpr', 'Hivep1', 'Zzef1', 'Atl3', 'Spag4', 'Dnajc30', 'Trim39', 'Gpbp1', 'Phf21a', 'Nat10', 'Mga', 'Bnip3l', 'Nsun6', 'Tdg', 'Arl4d', 'Dctn4', 'Slc44a4', 'Pura', 'Ppig', 'Mettl4', 'Golga1', 'Copb1', 'Gmppb', 'Tmf1', 'T…	191	5
Hdac2	'Sox4', 'Psrc1', 'Cks2', 'Ptma', 'Dazap1', 'Dap3', 'Ppia', 'Aqp11', 'Cenpp', 'Ppp5c', 'Sae1', 'Cux1', 'Ccnb1','Rhebl1', 'Hmgb1', 'Tbl1x', 'Ssbp3', 'Dda1','Tagln3', 'Zfhx2', 'Mpped2', 'Bhlhb9', 'Sox11', 'Gap43', 'Rbmx', 'Uchl1', 'Nanos3', 'Zfp579', 'Zfp775', 'Rcor2', 'Smarcd1', 'Meis2', 'Sox4', 'Foxp2', 'Tuba1b', 'Eif5a', 'Bclaf1', 'Rab3a', 'Celf4', 'Hnrnph1', 'Tmem108', 'Npm1', '2810006K23Rik', '…	169	5
Pbx3	'Arrdc3', 'Irx3', 'Meis2', 'Nck1', 'Sp4', 'Ncoa3', 'Plekha7', 'Pacsin2', 'Hjurp', 'Epha4', 'Cnot6', 'Hivep3', '1500009L16Rik', 'Cetn3', 'Elk4', 'Pbx3', 'Tmem30a', 'Klf3', 'Ptn', 'Extl3', 'Foxc1', 'Mef2c', 'Foxn3', 'Hnrnph3', 'Usp6nl', 'Elk3', 'Dync2h1', 'Ccnd2', 'Mllt6', 'Erbb3', 'Eif4g3', 'Tab2', 'Hoxb4', 'Srcin1', 'Bcl9l', 'Mycn', 'Cyp26b1', 'Sox12', 'Bbc3', 'Msi2', 'BC005537', 'Nog', 'Pak3', '…	132	5
Snai3	'Ppm1h', 'Taf3', 'Lef1', 'Snai3', 'Nsg2', 'Cd247', 'Fgf13', 'Serinc2', 'Srpk1', 'Sit1', 'Def6', 'Arv1', 'Rnf144b', 'Cd3g', 'Ptger4', 'Wasl', 'Sh3gl2', 'Ston2', 'Mbp', 'Abcb9', 'Padi4', 'Ano1', 'Churc1', 'Mllt3', 'Ikzf2', 'AI467606', 'Trp53inp1', 'Scamp5', 'Slc6a9', 'Ccnd2', 'Ctse', 'Snx4', 'Bcl11b', 'Sla2', '2200002D01Rik', 'Slc14a1', 'Smg5', 'Nbeal2', 'Rasgrp1', 'Atp6v0a1', 'Stim1', 'Lat', 'Prkc…	67	5
Pknox1	'Des', 'Rapsn', 'Ank1', 'Ubn1', 'Rab11b', 'Pde1c', 'Sh3gl1', 'Fam193a', 'Flnc', 'Nck1', 'Deptor', 'Slc39a14', 'Wac', 'Gal', 'Tbc1d15', 'Ppp4r2', 'B4galt7','D430042O09Rik', 'Glyr1', 'Cyb5d2', 'Bcl2l13', 'Dennd5a', 'U2af1l4', 'Ppp2r2d', 'Rbm12', 'Slc38a6','Ap3m2', 'Lpin2', 'Dolpp1', 'Rsbn1l', 'Barx2', 'Zfp516', 'Ubap2l', 'Hist1h3g', 'Cnnm2', 'Map3k3', 'Mex3b', 'Mars2', 'Vgll4', 'Pknox1', 'Plce1'	41	5
Foxk1	'Dpep2', 'Atg14', 'Tmem164', 'Maml3', 'Cnnm3', 'Megf9', 'Thtpa', 'Fam49a', 'Bahcc1', 'Atg2a', 'Plcb2', 'Il1f9', 'Scml4', 'Dusp16', 'Arhgef10l', 'Epyc','Dhx8', 'Ppp4r1', 'Scly', 'Ddi2','Rxrb', 'Nhsl1', 'Tnip2', 'Ahdc1', 'B4galt7', '9130008F23Rik'	26	5
Elf5	'Tnpo3', 'Appl2', 'Bin3', 'Epn1', 'Fbxo28', 'Arfip1', 'Mettl6', 'Dnajb9', 'Eaf1', 'Gabpa', 'Csnk1g1', 'Trip4', 'Pyroxd1', 'Paip2', 'Cdk13', 'Lypla2', 'Fibp', 'Cd2bp2', 'Ap1m1', 'Arih2', 'Tbc1d22a', 'Tssc4', 'Dhx36', 'Vps52', 'Gga1', 'Bcl2l1', 'Pik3r4', 'Fam188a', 'Zranb2', 'Syvn1', 'Cbll1', 'Zcchc6', 'Rnf167', 'Ccz1', 'Nprl2', 'Cyb561d2', 'Rer1', 'Slc25a46', 'Gnai3', 'Fam96a', 'Mtmr4', 'Slc39a13'…	3260	NA
Klf4	'Pdlim7', 'Cast', 'Elovl1', 'Vcl', 'Jup', 'Coro1c', 'Iffo2', 'Plec', 'Lamp2', 'Ptrf', 'Anxa8', 'Luzp1', 'Chl1', 'Rab22a', 'Creb3l1', 'Tm2d2', 'Tnks1bp1', 'Rtn4', 'Lman1', 'Arhgap23', 'Rell1', 'Myadm', 'Acer3', 'Tbc1d10a', 'Fam63b', 'Slc25a20', 'Sertad1', 'Morf4l2', 'Dkkl1', 'Habp4', 'Atf5', 'Tuft1', 'Klf3', 'Rnf19b', 'Serpinb2', 'Ralbp1', 'Pmp22', 'Gatad2a', 'Csrp2', 'Rusc1', 'Tubb2b', 'Cited4', …	1781	NA
Nfkb1	'Nfkb2', 'Nfkbia', 'Gpbp1', 'Creb1', 'Tnfaip3', 'Cxcl10', 'Relb', 'Stat5a', 'Appl1', 'Map3k8', 'Cxcl1', 'Rel', 'Ank2', 'Cxcl2', 'Sdc4', 'Tank', 'Steap4', 'Tnip1', 'Arhgef2', 'Cd74', 'Osmr', 'Ccl5', 'Ier2', 'Arl5b', 'Smad3', 'Mapk6', 'Hivep2', 'Egr2', 'Ifngr2', 'Casp4', 'Stx11', 'Actn1', 'Tpbg', 'Cdk17', 'Fas', 'Ptprj', 'Gabpb1', 'Il6', 'Map4k4', 'Psme2', 'Ebi3', 'Dleu2', 'Col11a2', 'Socs2', 'Cpne…	1111	NA
Creb3l4	'Tspan13', 'Sytl1', 'Eml2', 'Hook1', 'Sema5a', 'Golgb1', 'Kdelr2', 'Kdelr3', 'Qsox2', 'Tm9sf3', 'Pkdcc', 'Cyb561', 'Galnt3', 'Mrps31', 'Ptprf', 'Pdia5', 'Sdcbp2', 'Efnb1', 'Comtd1', 'Rorc', 'Src', 'Cant1', 'Prkg2', 'Prss8', 'Slc26a2', 'Gfpt1', 'B4galt4', 'Pitx2', 'Ephb3', 'Rrbp1', 'Smagp', 'Slc37a1', 'Galnt6', 'Scamp2', 'Txndc5', 'Htatip2', 'Crls1', 'Nans', 'Ehf', 'Tcf7l2', '1700066B19Rik', 'Cldn…	1020	NA
Etv4	'Foxj3', 'Slc1a4', 'Chst1', 'Ephb3', 'Etv4', 'Kcnip3', 'Klhl8', 'Etv5','Eif3g', 'Urm1', 'Vmp1', 'Tomm70a', 'Dmap1', 'Cap1', 'Ercc3', 'Lsm1', 'Nudt5', 'Ppid', 'Psmd6', 'Ppp1r16a', 'Fbxo28', 'Sco1', 'Actr6', 'Eif3l', 'Srbd1', 'Fam96b', 'Brf2', 'Chchd5', 'Gabarapl2', 'Rpf2', 'Prkcsh', 'Utp14a', 'Tmem101', 'Txn2', 'Nol6', 'Rsl24d1', 'Eif4e2', 'Ddx21', 'Timm23', 'Psmb7', 'Serpinb6a', 'Tomm20', 'Eif3m'…	1016	NA
Klf9	'Midn', 'Thra', 'Gnao1', 'Tead3', 'Hdgf', 'Ccnd2', 'Col1a1', 'Bcl9l', 'Erf', 'Igfbp5', 'Slc4a2', 'Lasp1', 'Flnc', 'Glis2', 'Zfp36l1', 'Fzd2', 'Nlgn2', 'Nfix', 'Rora', 'Phf21a', 'Flna', 'Pcgf2', 'Cacnb1', 'Vamp2', 'Fosb', 'Bcl3', 'Junb', 'Hook2', 'Sema3b', 'Mmp14', 'Agrn', 'Klf9', 'Tspan31', 'Efnb1', 'Vat1', 'Hic1', 'Arhgap31', 'Tshz3', 'Grasp', 'Kdm6b', 'Wnt6', 'Trerf1', 'Adcy6', 'Ctdsp1', 'Ncam1…	993	NA
Nfatc1	'Rcan1', 'Polr2a', 'Mef2c', 'Map3k8', 'Cadm1', 'Plp1', 'Dkk2', 'Ubash3b', 'Ccdc80', 'Isyna1', 'Usp47', 'Rftn2', 'Trim8', 'Tpm3', 'Rilpl2', 'Prrx1', 'Sh2b3', 'Tiam2', 'Tgfb3', 'Epas1', 'Fndc3b', 'Nr4a2', 'Twist2', 'Nfatc1', 'Nfkbia', 'Twist1', 'Icam1', 'Cdk2ap1', 'Bbx', 'Il11ra1', 'Phf21a', 'Ntm', 'Pbx1', 'Il11', 'Chst11', 'Tacc2', 'Mdga1', 'Gli3', 'Lin7a', 'Itga5', 'Dixdc1', 'Ift80', 'Fst', 'Cytl…	908	NA
Runx1	'Col11a2', 'Coro1a', 'Kdm6b', 'Dusp5', 'Actr2', 'Arrb2', 'Nckap5l', 'Lrrc25', 'Rasal3', 'Dusp7', 'Pik3r5', 'Ikzf1', 'Sh3bp2', 'Cited2', 'Rnd1', 'Fhl3', 'Hmga1', 'Dennd1c', 'Tlr4', 'Ctsd', 'Skil', 'Acp2', 'Tpm3', 'Cap1', 'Gpc4', 'Cd82', '1700112E06Rik', 'Rab3il1', 'Mapk1ip1l', 'Jakmip1', 'Rlim', 'Psd4', 'Tnip1', 'Prkg1', 'Fblim1', 'Cttnbp2nl', 'Sh3kbp1', 'Sun2', 'Mef2d', 'Il21r', 'Map2k3', 'Lcp2',…	864	NA
Runx2	'Mmp13', 'AI504432', 'Runx2', 'Nucb2', 'Slc39a11', 'Lag3', 'Mkl1', 'Plcb2', 'M6pr', 'Spns3', 'Ltc4s', 'Tmem229b', 'Cd200r1', 'Rgs18', 'Cln3', 'Dmxl1', 'Pag1', 'Nlrx1', 'Tcf7l2', '1810011H11Rik', 'Sh2d1b1', 'Edem2', 'Ppp6r1', 'Bcap31', 'Spn', 'Il18rap', 'Itgal', 'Slamf9', 'Igsf8', 'Runx1', 'Bcl11a', 'Tcf20', 'Apobr', 'Hpse', 'Fbxw4', 'Tgfbr1', 'Atp13a2', 'Soat1', 'Ptprs', 'Lmo4', 'Cd47', 'Dync1i2'…	821	NA
Klf10	'Coro1c', 'Cyth2', 'Klf10', '2210013O21Rik', 'Gnb2', 'Arf1', 'Plec', 'Ywhaq', 'Vamp3', 'Arrdc4', 'Plscr3', 'Sgk1', 'Ahnak', 'Ywhae', 'Rarg', 'Cpne8', 'Lxn', '1700025G04Rik', 'Vapa', 'Anxa2', 'Clic1', 'Tmem43', 'Rfx2', 'Zfpl1', 'Acvr1b', 'Rab2a', 'Sumo3', 'Slc7a6os', 'Rab5a', 'Rcan1', 'Eif1', 'Slc27a3', 'Med26', 'Elmo2', 'Cast', 'Col11a2', 'Tm2d2', 'Prickle2', 'Dysf', 'Sertad2', 'Stx6', 'Iffo2', '…	720	NA
Tcf4	'Prrx1', 'Svep1', 'Plp1', 'Fermt2', 'Dkk2', 'Tmem150a', 'Epas1', 'Zfp36l1', 'Mllt6', 'Prdm16', 'Spry4', 'Peli2', 'Meis2', 'Mycn', 'Neurl1b', 'Lims2', 'Igfbp4', 'Ccnyl1', 'Mat2a', 'Glg1', 'Atoh8', 'Ccdc80', 'Id3', 'Gtf2a1', 'Tspan13', 'Klf7', 'Ntf3', 'Olfm1', 'Bin1', 'Sh2b3', 'Ppp3ca', 'Scara3', 'Nr4a1', 'Slco3a1', 'Map4k4', 'Cpne5', 'Klf2', 'Nkd1', 'Dlgap4', 'Aif1l', 'Cdk14', 'Nrarp', 'Tsc22d1', …	618	NA
Klf7	'Itsn1', 'Slc2a4', 'Unc13b', 'Myh9', 'Vcl', 'Pgrmc2', 'Coro1c', 'Abcd1', 'Sh2b3', 'Pdlim7', 'Luzp1', 'Srgap2', 'Cnnm2', '4921524J17Rik', 'Orc4', 'Creb3l1', 'Sertad1', 'Slc25a20', 'Stat3', 'Mospd1', 'Nbea', 'Cnot4', 'Lman1', 'Xpnpep1', 'Cyth2', 'Prrc2a', 'Orai1', 'Sox11', 'Acer2', 'Wasf1', 'Trim24', 'Rrbp1', 'Klf13', 'Mfge8', 'Trip10', 'Hlx', 'Qrich1', 'Deptor', 'Myo10', 'Cpd', 'Marcks', 'Atxn2', …	593	NA
Rfx2	'Bahd1', 'Tagln2', 'Nfatc2', 'Chl1', 'Nmnat3', 'Rai1', 'Sh3pxd2b', 'Sfmbt1', 'Mnt', 'Zbtb34','Csnk1g1', 'Trip4', 'Kif3b', 'Mapre3', 'Ptpn4', 'Traf3ip1', 'Cyth2', 'Wdr31', 'Sec14l1', 'Lrrc56', 'Mxd4', 'Cep120', 'Ppm1g', 'Cdc14a', 'Gtf2f1', 'Pask', 'Arl4a', 'Chn1', 'Ift81', 'Ncoa5', 'Cep164', 'Dnaic1', 'Ak1', 'Tsga10', 'Dyrk3', 'Prdm4', 'Fkbpl', '1110051M20Rik', 'Med9', 'Ip6k1', 'Tctn3', 'Pcsk4', '…	578	NA
Ybx1	'Tomm40', 'H3f3b', 'Hsp90b1', 'Camta1', 'Hspa5', 'Rnf181', 'Cdca2', 'Pin1', 'Cks1b', 'Katnb1', 'Pgp', 'Atp5g1', 'Ift140', 'Fdft1', 'Hmgb2', 'Fam46b', 'Spsb3', 'Hook1', 'Cdc6', 'Hist1h3c', 'Wdr62', 'Vcp', 'Cdkn3', 'Ccnb2', 'Ube2c', 'Top2a', 'Fdps', 'Recql', 'Slc2a8', 'Rpa2', 'Sox4', 'Etf1', 'Snrpa', 'Ppp1r7', 'Manf', 'Cdc23', 'Mcm3', 'Aimp2', 'Rpain', 'H2afx', 'Calr', 'Armc1', 'Hmgb1', 'Wbp1', 'Pn…	540	NA
Tcf7l1	'Prrx1', 'Svep1', 'Epas1', 'Fst', 'Spry4', 'Ccnyl1', 'Ccdc80', 'Nrarp', 'Id3', 'Ranbp1', 'Atoh8', 'Igfbp4', 'Tmem150a', 'Osr1', 'Ccnd2', 'Amotl2', 'Fosb', 'Tpm1', 'Calm1', 'Csrp2', 'Zfp503', 'Penk', 'Prelp', 'Zadh2', 'Ctnna1', 'Ace', 'Actg1', 'Zfp703', 'Tsc22d1', 'Egr1', 'Rspo3', 'Nfib', 'Tcea3', 'Igfbp3', 'Gdf15', 'Fam102b', 'Baiap2', 'Loxl3', 'Cyr61', 'Arhgef5', 'Rbms3', 'Gli3', 'Pcgf2', 'Smad6…	476	NA
Hif1a	'Pias1', 'Smurf1', 'Atxn2l', 'Snapc1', 'Usp36', 'Kpna1', 'Ccnt2', 'Rnf34', 'Thap2', 'Zfp526', 'Hif1a', 'Pgk1', 'Tbcel', 'Ddx17', 'Clpx', 'Rragc', 'Mbd5', 'Rab5a', 'Cab39', 'Dtnb', 'Vps37a', 'Pip5k1a', 'Igfbp2', 'Zfp384', 'Atp6v1a', 'D230025D16Rik', 'Nrn1', 'Fbxl20', 'Topors', 'Pdzd8', 'Dnajc1', 'Dusp4', 'Tnks2', 'Crkl', 'Abl2', 'Snapc3', 'Klc3', 'Pptc7', 'Hivep3', 'Pafah1b1', 'Hmgxb3', 'Map2k4', …	431	NA
Tead1	'Wwc2', 'Col12a1', 'Cyr61', 'Ctgf', 'Amotl2', 'Sgk1', 'Tiam2', 'Zswim4', 'Nfe2l1', 'Ppfibp1', 'Osmr', 'Lrp6', 'Zfp185', 'Tpbg', 'Islr', 'Ccl17', 'Bcl9l', 'Chrnb1', 'Dlc1', 'Ptpn21', 'Phactr2', 'Fry', 'Ptrf', 'Nab2', 'Rai14', 'Amotl1', 'Dusp6', 'Tnks1bp1', 'Ctf1', 'Fndc3b', 'Matn4', 'Slc12a4', 'Egfl8', 'Trip6', 'Yap1', 'Thbs1', 'Lox', 'Ager', 'Irs1', 'Ctdsp2', 'Nnt', 'Tro', 'Rhbdf1', 'Nfat5', 'Arh…	417	NA
Bptf	'Gigyf1', 'Rere', 'Jund', 'Ppp1r9a', 'Wipf2', 'Ubtf', 'Atxn1', 'Hnrnpc', 'Zfp362', 'Gse1', 'Stx16', 'Slc44a2', 'Rpgrip1', 'Ebf1', 'Vgll4', 'Bcor', 'Stk38', 'Phactr4', 'Tnrc18', 'Mga', 'Brd4', 'R3hdm2', 'Chd7', 'Igf2bp3', 'Mllt10', 'Rbms2', 'Dennd5a', 'Arid1a', 'Zfp217', 'Myh9', 'Nol6', 'Gtf3c2', 'AI846148', 'Fbxl20', 'Smarca2', 'Zfhx2', 'Qrich1', 'Spag9', 'Nfat5', 'Taok1', 'B330016D10Rik', 'Pcdh1…	412	NA
Prdm1	'Cdipt', 'Zmiz1', 'Fam117b', 'Ctbp2', 'Mov10', 'Mmp13', 'Naif1', 'Arhgef3', 'Shoc2', 'Zbtb42', 'F11r', 'Zfp296', 'Etv3', 'Skil', '1700112E06Rik', 'Tlr4', 'Lrrk1', 'Hfe', 'Stx7', 'Ankrd44', 'Csf1r', 'Eng', 'Klf16', 'Zfp385a', 'Prdm1', 'Cd68', 'Cxcr3', 'Osbpl11', 'Ldb1', 'Ddx3y', 'Fmnl3', 'Slco2b1', 'Fam168a', 'Numb', 'Ptprm', 'Ppm1j', 'Mrc1', 'Cttnbp2nl', 'Nedd9', 'Acvrl1', 'Fam110a', 'Mylk', 'Ccl…	386	NA
Jdp2	'C3ar1', 'Mmp19', 'Emilin2', 'Ubash3b', 'Cd68', 'Il1rn', 'Zfp516', 'Anxa2', 'Tbxas1', 'Cd14', 'Msr1', 'Slc7a11', 'P2ry6', 'Ccl17', 'Psap', 'Il1b', 'Ccl7', 'Bcl2a1b', 'Bcl2a1d', 'Bcl2a1a', 'Rffl', 'Cd63', 'Slamf9', 'Ccrl2', 'Cfp', 'Dab2', 'Antxr2', 'Clec4e', 'Ccl24', 'Clec7a', 'Ahr', 'S100a11', 'Nlrp3', 'Snx10', 'Gcnt2', 'Slc15a3', 'C1qc', 'Mrc1', 'Tac1', 'Ppfia4', 'Padi4', 'Sqstm1', 'Ccr7', 'Capg…	368	NA
Foxj2	'BC048403', 'Tlr4', 'Nlrx1', 'Rab3gap2', 'Zranb3', 'Cnnm3', 'Maml3', 'Luc7l2', 'Rara', 'Trerf1', 'Zfp362', 'Tcf7l2', 'Mgrn1', 'Crtc2', 'Rad21', 'Rnf44', 'Ppp3ca', 'Furin', 'Fbxl4', 'Vcpip1', 'Txnip', 'Cbx2', 'Rab11fip2', 'Napg', 'Epha7', 'Pogz', 'Rhof', 'Zscan12', 'Ncoa1', 'Hoxa4', 'Phlpp1', 'Abcc5', 'Efcab1', 'Tbl1xr1', 'Ipo13', 'Tnpo3', 'Clasp2', 'Mark1', '1110051M20Rik', 'Rab3a', 'Soat1', 'Tnr…	360	NA
Twist2	'Dpt', 'Serpine1', 'Prelp', 'C1qtnf1', 'Tnfaip6', 'Apod', 'Fap', 'Svep1', 'Fhl1', 'Emilin1', 'Gli3', 'Mxra8', 'Pdgfra', 'Nfia', 'Sh3kbp1', 'Fzd1', 'Etv1', 'Fzd2', 'Wfdc1', 'Il1r1', 'Ltbp1', 'C1ra', 'Gsn', 'Lrrn4cl', 'S1pr2', 'Adamtsl1', 'Tpbg', 'Zfp580', 'Psd3', 'Ddr2', 'C1qtnf6', 'Ntrk2', 'Ak1', 'Nptn', 'Nlgn2', 'Itgbl1', 'Mmp2', 'Thbs3', 'Maged1', 'Cry2', 'Ank2', 'Wdr92', 'Col3a1', 'Tbx18', 'Ra…	354	NA
Atf2	'Fam131a', 'Mmab', 'Sbsn', 'Zbtb33', 'Isl1', 'Ythdf3', 'Dhx40', 'Baz2b', 'Pex12', 'Clcn3', 'Tmem59l', 'Gnb2', 'Tbc1d23', 'Nek1', 'Phip', 'Smarca1', 'Rab21', 'Hivep1', 'Golga3', 'Usp9x', 'Srrm2', 'St13', 'Pura', 'Hnrnpu', 'Birc2', 'Dctn1', 'Zdbf2', 'Spata7', 'Ccdc124', 'Slc35b1', 'Nemf', 'Zfp574', 'BC031181', 'Fbxw7', 'Hsph1', 'Mpped2', 'Mettl4', 'Nap1l5', 'Ubap2l', 'Rab3a', 'Pitpnm2', 'Stag1', 'P…	294	NA
Zbtb7b	'Mink1', 'Mycbp', 'Camk1d', 'Sema4a', 'Hmgcr', 'Cxcr4', 'Slc9a3r1', 'Nadk', 'Tecr','Myh9', 'Vcl', '9930021J03Rik', 'Mepce', 'Cldn3', 'Asb7', 'Sema4a', 'Fam160a2', 'Cast', 'Chd3', 'Luzp1', 'Plec', 'Arhgef19', 'Tpcn1', 'Ikzf2', 'Mmp9', 'Lcorl', 'Rab8a', 'Ccl27a', 'Dnajc4', 'Egln2', 'Itga10', 'Iqgap1', 'Aldoa', 'Zfp524', 'Rarg', 'Zfp217', 'Cnot4', 'Brpf3', 'Tuba4a', 'Bcl11b', 'Avpi1', 'Gpbp1l1', 'Dn…	288	NA
Twist1	'Dnm3os', 'Dpt', 'C1qtnf1', 'Runx1t1', 'Aoc3', 'Fap', 'Svep1', 'Fhl1', 'Mxra8', 'Pdgfra', 'Dcaf4', 'C1ra', 'Gsn', 'S1pr2', 'Pde1a', 'Ddr2', 'C1qtnf6', 'Itgbl1', 'Mmp2', 'Thbs3', 'Col3a1', 'Aspn', 'Arap1', 'Cpxm1', 'Glt8d2', 'Prrx1', 'Fmod', 'Ptgs2', 'C4b', 'Angptl1', '2700081O15Rik', 'Rcn1', 'C3', 'Vasn', 'Lama4', 'Cd302', 'Prelp', 'Tnfaip6', 'Nid2', 'Emilin1', 'Nfia', 'Ltbp4', 'Lrrn4cl', 'Adamts…	271	NA
Vezf1	'Nufip2', 'Dnmt3a', 'Tug1', 'Klhl21', 'Prdm16', 'Zbtb10', 'Ahdc1', 'Pik3r1', 'Plec', 'Ctdspl', 'Ap4s1', 'Fam53c', 'Atxn7', 'Mex3a', 'Chd3', 'Ccnd2', 'Fbxo11', 'Phf21a', 'Mbd5', 'Hoxb4', 'Hoxc6', 'Pafah1b1', 'Pea15a', 'Bcl9l', 'Stag2', 'Sp4', 'Tsc22d1', '9930021J03Rik', 'Bcor', 'Nfix', 'Gdi1', 'Max', 'Smarca2', 'Vamp2', 'Auts2', 'Armcx2', 'Trim8', 'Cdk12', 'Chd4', 'Rere', 'Gsk3a', 'Bcam', 'Dlk1', …	257	NA
Nfix	'Ldlrad3', 'Glis2', 'Nfix', 'Apln', 'Jag1', 'Usp2', 'Mmp2', 'Fmod', 'Il11ra1', 'Ilf2', 'Endod1', 'Ralgds', 'Cspg4', 'Csdc2', 'Col12a1', 'Akr1e1', 'Pmepa1', 'Ntrk3', 'Npepps', 'Bgn', 'Sept8', 'Unc5b', 'Tef', 'Ssr3', 'Sv2a', 'Moxd1', 'Efs', 'Fam167a', 'Cdk18', 'Osr1', 'Etv4', 'Bdnf', 'Ptpra', 'Ptn', 'Ltbp2', 'Egfr', 'Cpxm2', 'Mmp16', 'Rhbdf1', 'Acot7', 'Glt8d2', 'Ephb3', 'Rab18', 'Ipo13', 'Pdgfra',…	241	NA
Etv5	'Cd14', 'Alcam', 'Lag3', 'Trim8', 'Fcgr1', 'Amhr2', 'Tbxas1', 'Olfml3', 'Tlr4', 'Gnaq', 'Slc16a6', 'Hivep3', 'Zfhx3', 'Lpin2', 'Frmd4a', 'Zfp711', 'Epn3', 'Elovl1', 'Slc9a9', 'Ppfia4', 'Usp2', 'Slc39a8', 'Plxdc2', 'Rreb1', 'Tm9sf4', 'Pip5k1b', 'Tmem119', 'Csf3r', 'Tagap', 'Vsig2', 'Siglece', 'Pacsin2', 'AA986860', 'Ank3', 'Kdm2b', 'Nkd1', 'Wdr81', 'Ccnd1', 'Gpd1', 'Spint1', 'Elmo1', 'G6pc3', 'Asp…	224	NA
Zbtb33	'Rc3h2', 'Qrich1', 'Ino80', 'Rnpc3', 'Smg7', 'Cul3', 'Polr2b', 'Ndufa7', 'Pign', 'Dido1', 'Hdac6', 'Dhx37', '2810006K23Rik', 'Cnnm2', 'Grk4', 'Ap4e1', 'Snx13', 'Ranbp9', 'Rev1', 'Eed', '6330408A02Rik', 'Cramp1l', 'Kpna3', 'Ddx17', 'Zfp384', 'Trim39', 'Extl2', 'Zc3h4', 'Sos2', 'Usp31', 'Aptx', 'Setd1a', 'Ube2q1', 'Usp9x', 'Sox6', 'Tbc1d8b', 'Zzef1', 'Gosr2', 'Cab39l', 'Suox', 'Nanp', 'Sdf2l1', 'Wa…	224	NA
Cnot3	'Ubap2l', 'Ddx6', 'Tnrc18', 'Sart3', 'Phf12', 'Kdm6a', 'Xpo1', 'Hnrnpul1', 'Pnrc2', 'Lrrc51', 'Runx1t1', 'Azi2', 'Hist2h4', 'Nr2f1', 'Agbl5', 'Zmynd8', 'Camkk2', 'Tal1', 'Kpnb1', 'Zfp768', 'Cdkn1b', 'Asxl2', 'Tmem131', 'Ddx17', 'Ehmt2', 'Ing2', 'Zbtb7b', 'Khdrbs1', 'Pabpn1', 'Mta3', 'Cdc73', 'Pip5k1b', 'Wac', 'Scaf11', 'N4bp1', 'Cbll1', 'Fip1l1', 'Cnot3', 'Galk2', 'Vps13a', 'Gpr137', 'Chic2', 'Zr…	210	NA
Brf1	'Agbl5', 'Polg', 'Elmo3', 'Sema4b', 'Bcdin3d', 'Rpusd3', 'Fam175b', 'Inha', 'Kat5', 'Gtf2f1', 'Arl6ip6', 'Dlk1', 'Lin37', 'Dbr1', 'Rbck1', 'Tk2', 'Rpap1', 'Dnajb12', 'Prdm10', 'Spata7', 'Tagap1', 'Pigb', 'Tmc6', 'Nupl2','Cyth2', 'Tmem87b', 'Yars', 'Rfxank', 'Aamp', 'Eif2ak1', 'Brf1', 'Tpd52l2', 'Mier2', 'Tinf2', 'Tmem167', 'Cdk2ap1', 'Odf2', 'Wwox', 'Gm527', 'Rngtt', 'Vps26a', 'Diablo', 'Fundc1',…	199	NA
Meox1	'Svep1', 'Spry4', 'Epas1', 'Lims2', 'Fermt2', 'Klf2', 'Egr1', 'Sntb2', 'Klf7', 'Ace', 'Eln', 'Nrarp', 'Igfbp3', 'Tmem150a', 'Prdm16', 'Amotl2', 'Nbeal1', 'Sspn', 'Atoh8', 'Ddit4', 'Cdk17', 'Plxna2', 'Mycn', 'Armcx3', 'Id3', 'Ccdc80', 'Maff', 'Fbn1', 'Neurl1b', 'Rhob', 'Kifc3', 'Cdk14', 'Chst11', 'Fli1', 'Nrp1', 'Rbfox2', 'Tpm1', 'Gnaq', 'Fn1', 'Tspan13', 'Prkd2', 'Mllt6', 'Jag1', 'Cdkn1c', 'Adamt…	196	NA
Arnt	'Tbcel', 'Ankrd12', 'Ubn1', 'Cdkn2c', 'Uvrag', 'Pias1', 'Irs1', 'Kcne4', 'Rps6ka4', 'Tet2', 'Lrrc8a', 'Pura', 'Stx4a', 'Fzd7', 'Braf', 'Aff4', 'Eif4g1', 'Igf2r', 'Fam13b', 'Dusp22', 'Bcl6', 'Crispld1', 'Ssr1', 'Ehmt2', 'Mfap1b', 'Phf20l1', 'Sf3b1', 'Rragc', 'Spty2d1', 'Dnajb4', 'D230025D16Rik', 'Hnrnph2', 'Lrfn4', 'Depdc1b', 'Dact1', 'Bex4', 'Stx5a', 'Akap10', 'Tial1', 'Becn1', 'March6', 'Psme4',…	191	NA
Sox9	'Fxyd3', 'Fgfrl1', '4930523C07Rik', 'S100b', 'Chad', 'Klhl21', 'Mcoln2', 'Acan', 'Abtb2', 'Runx1', 'Ppp1r1b', 'Samd4', 'Tgfa', 'Tnfrsf11b', 'Rin2', 'Mtss1l', 'Foxp4', 'Gpd2', 'Ptn', 'Col8a2', 'Gse1', 'Scrg1', 'Cdk2ap1', 'Mras', 'Sobp', 'Rtkn', 'Phc2', 'Foxp2', 'Tubb2b', '2610203C20Rik', 'Ctgf', 'Col9a3', 'Pak1', 'Capn6', 'Cdc42se1', 'Fgfr3', 'Col9a1', 'Fkbp1b', 'Shf', 'Col11a2', 'Cytl1', 'Ccnj', …	173	NA
Cux1	'Palm3', 'Mgat5', 'Eif2s3x', 'Ssbp1', 'Ezh2', 'Gabpb1', 'Rc3h1', 'Tdg', 'Cux1', 'Ppp1r14b', 'Rwdd3', 'Rptor', 'Ccnt1', 'Tbk1', 'Gsk3a', 'Atp6v1g1', 'Mettl3', 'Ino80d', 'Cse1l', 'Atl2', 'Ap4s1', 'Rundc1', 'Pif1', 'Mylpf', 'Mrps10', 'Atp13a3', 'Mgea5', 'Sf1', 'Eif2b5', 'Sox4', 'Osbpl8', 'Eif4g1', 'Cbx1', 'Khdrbs1', 'Rcc2', 'Hnrnpc', 'Hmgb1', 'Spag5', 'Emx2', 'Phf21a', 'Srsf3', 'Wdr81', 'Brd4', 'Wdt…	171	NA
Etv1	'Efnb3', 'Agpat4', 'Plp1', 'Sept4', 'Atp1a2', 'Gpm6b', 'Il33', 'Syt11', 'Enpp2', 'Chst1', 'Pdlim2', 'Adamts4', 'C2cd2l', 'Elmo1', 'Ppp1r16b', 'Tsc22d4', 'Sv2a', 'Ppp1r9b', 'Rapgef4', 'Prex1', 'Agap3', 'Scamp5', 'Frmd4a', 'Rassf2', 'Cntfr', 'Prickle2', 'Pea15a', 'Srgap3', 'Apln', 'Ppip5k1', 'Pabpn1', 'Srcin1', 'Arhgef2', 'Dnmt3a', 'Afap1l2', 'Slc6a9', 'Zfp462', 'Phldb1', 'Dusp7', 'Myo18a', 'Igsf8'…	160	NA
Foxp4	'Hivep2', 'Rictor', 'Ptbp2', 'Cxxc5', 'Gse1', 'Trim8', 'Foxp4', 'Fam53c', 'Zfp703', 'Nedd4l', 'Slc6a6', 'Maml3', 'Plekha5', 'Fzd7', 'Rab3a', 'Tmem2', 'Tgif1', 'Mapk3', 'Ephb3', 'Fgfr2', 'Fhdc1', 'Eya2', 'Cdc42ep4', 'Actg2', 'Smad3', 'Sp1', 'Fam178b', 'Csnk1e', 'Dusp16', 'Slc34a2', 'Akt2', 'Mtmr12', 'Sox9', 'Picalm', 'Srsf9', 'Rhbdd1', 'Syne1', 'Fgfbp3', 'Etv5', 'Ppard', 'Tmem218', 'Bcl6', 'Zfp867…	151	NA
Clock	'Gla', 'Mfsd1', 'Mcoln1', 'Arfgef2', 'Tug1', '1810013L24Rik', 'Lats2', 'Eif5a2', 'Rabgap1', 'Tnpo2', 'Dolk', 'Faf1', 'Pdcd6ip', 'Dip2b', 'Ccar1', 'Bptf', 'Pip5k1a', 'Actn2', 'Pkn2', 'Dnmt3a', 'Mms19', 'Pdp1', 'Mbd5', 'Mtm1', 'Cfl2', 'Kcne4', 'Atp6v1a', 'Rabep1', 'Aars', 'Slc25a36', 'Tceal1', 'Lrfn4', 'Eno2', 'Clcn7', 'Thap6', 'Btbd7', 'Nudt9', 'Fnip2', 'Arl2', 'Nckap1', 'Tceal5', 'Megf9', 'Extl2'…	144	NA
Hoxa10	'Atf3', 'Ntf3', 'Tmem150a', 'Pop5', 'Tbx2', 'Per1', 'Ubap2l', 'Pkdcc', 'Fxyd2', 'Fosb', 'Wfdc1', 'Mtx1', 'Dkk2', 'Kifc3', 'Hoxb7', 'Smarca2', '1190002N15Rik', 'Gprc5a', 'Col1a1', 'Hoxa10', 'Hic1', 'Bdnf', 'Osr1', 'Hoxb6', 'Slc25a4', 'Nuak2', 'Fos', 'Fblim1', 'Llgl2', 'Svep1', 'Vcl', 'Slc39a8', 'Hoxb8', 'Tcea3', 'Tbc1d1', 'Tmem147', 'Atxn1', 'Hnrnph1', 'Wnt2', 'Meis2', 'Sdc4', 'Tesc', 'Wls', 'Cdc1…	138	NA
Six1	'Samd4', 'Prrx1', 'Tmem150a', 'Gadd45b', 'Prelp', 'Map4k4', 'Fosb', 'Dlg4', 'Ccdc80', 'Fst', 'Mat2a', 'Penk', 'Nova1', 'Celf2', 'Fbn1', 'Nfkbiz', 'Utp18', 'Hivep2', 'Ccnyl1', 'Errfi1', 'Cdk14', 'Deptor', 'Fn1', 'Irf1', 'Plxdc2', 'Sspn', 'Col11a2', 'Nr4a1', 'Sox11', 'Vprbp', 'Ankrd28', 'Boc', 'Vgll3', 'C1qtnf1', 'Loxl3', 'Numbl', 'Il11ra1', 'Lin7a', 'Sntb2', 'Rspo3', 'Scara3', 'Rtn2', 'Rfx5', 'Fnd…	125	NA
Ovol2	'Crb3', 'Ovol2', 'Epn3', 'Itga3', 'Hook2', 'Tmem184a', 'Casz1','Ap1m1', 'Smoc1', 'Uggt2', 'Katnal1', 'Hdgfrp2', 'Ovol2', 'Hspa2', 'Ube2s', 'Phf7', 'Dcaf7', 'Usp1', 'Crybg3', 'Ccl27a', 'Bbx', 'Btbd10', 'Zranb3', 'Arl3', 'Ppm1g', 'Socs7', 'Ccnk', 'Mtx1', 'Ints6', 'Samd4', 'Diablo', 'Traf3ip1', 'Tbpl1', 'Rfx2', 'Nasp', 'Egln2', 'Mapkbp1', 'Brms1', 'Cep57', 'Pde4dip', 'Thnsl1', 'Enkur', 'Pask', 'Map3…	123	NA
Plagl1	'Nr2f2', '9930021J03Rik', 'Bdnf', 'Fkbp10', 'Igfbp5', 'Chad', 'Foxp2', 'Nos3', 'Bhlhe40', 'Cmtm5', 'Sv2a', 'Igf2', 'Hhip', 'Erf', 'Nlgn2', 'Sncaip', 'Tpbg', 'Dcn', 'Acan', 'Nf1', 'Yars', 'Nynrin', 'Sox10', 'Meis2', 'Fn1', 'Col12a1', 'Gprasp2', 'Gas5', '1700025G04Rik', 'Ust', 'Lox', 'Hand2', 'Nr4a2', 'Lzts2', 'Zcchc24', 'Gria3', 'Myc', 'Rora', 'Fam53c', 'Nanos3', 'Dab1', 'Adamts4', 'Morf4l2', 'Pde…	118	NA
Creb1	'Nup133', 'Epc1', 'Bap1', 'Ube2q1', '3830406C13Rik', 'Fam131a', 'Ube4a', 'Trmt2a', 'Smarcad1', 'Armcx2', 'Tceal1', 'Parp2', 'Med27', 'Dscr3', 'Cct4', 'Wdr82', 'Snrnp27', 'Erf', 'Mxi1', 'Creb1', 'Zfp280c', 'Fam178b', 'Sall2', 'Ubl7', 'Trak1', 'Ythdc2', 'Slc38a6', '1700084E18Rik', 'Zfp281', 'Spata7', 'Abce1', 'Hist1h4h', 'Als2', 'Atg5', 'Zfyve27', 'Gtpbp1', 'Ppp2ca', 'Zfp367', 'Bre', 'Cyld', 'Znrd1…	111	NA
Erf	'Extl3', 'Ss18', 'Wdr26', 'Dusp6', 'Sptlc2', 'Tmem101', 'Smug1', 'Fbxw11', 'Slc39a6', 'Ppid', 'Crk', 'Cops7a', 'Cggbp1', 'Rnf185', 'Stoml2', 'Shoc2', 'Arl5b', 'Prkab1', 'Psmd6', 'Lyrm7', 'Lztfl1', 'Smu1', 'Ipo4', 'Tgif2', 'Skil', 'Kdelc1', 'Cradd', 'Sgk1', 'Yes1', 'Mtor', 'Acbd5', 'Spint1', 'Prpf3', 'Necap1', 'Lrrc41', 'Faf2', 'Gas2', 'Acvr1', 'Cars', 'Tmem33', 'Yipf5', 'Yars', 'Aph1a', 'Mrpl38',…	97	NA
Meis2	'Gmfg', 'Meis2', 'Egfl8', 'Ehd3', 'Fmnl2', 'Osbpl5', 'Irx3', 'Cldn15', 'Calcrl', 'Dram1', 'Calca', 'H2afy2', 'Fam117b', 'Slc25a4', 'Dnajb4', 'Prickle2', 'Cdc14a', 'Rab3b','Ric8b', 'Chpf', 'Tmem39a', 'Mycbpap', 'Ncald', 'Creb3l2', 'Spata7', 'Ptpru', 'Fam71e1', 'Foxp2', 'Peg3', 'Ift81', 'Zdbf2', 'Isl1', 'Meg3', 'Srpr', 'Pura', 'Spag4', 'Habp4', 'Ptpn21', 'Sec23b', 'Klhl13', 'Prkce', '1700029J07Rik'…	97	NA
Msx2	'Prrx1', 'Llgl2', 'Kctd1', 'Sspn', 'Lasp1', 'Hmga1', 'Actg1', 'Bambi', 'Msx2', 'Rbpms2', 'Amotl2', 'Nrarp', 'Rnf2', 'Lmo1', 'Nr4a1', 'Ntf3', 'Msx1', 'Col27a1', 'Gprc5c', 'Ehd4', 'Morc4', 'Phf19', 'Smad6', 'Sdc1', 'Bmp7', 'Klhl21', 'Marcksl1', 'Plcd1', 'Ube2f', 'Sox9', 'Eomes', 'Srf', 'Cast', 'Dusp6', 'Hivep2', 'Ctnnb1', 'Mbtd1', 'Ncam1', 'Ccdc3', 'Sfn', 'Aqp3', 'Ank', 'Kctd15', 'Hbegf', 'Denr', '…	97	NA
Thra	'Atp1a2', 'Arhgap23', 'Dnm1', 'Sox10', 'Thra', 'Gnao1', 'Vamp2', 'Zfp462', 'Srcin1', 'Eml2', 'Tsc22d1', 'Adamtsl4', 'Cntfr', 'Spock2', 'Dact3', 'Sv2a', 'Pcgf2', 'Nfix', 'Igfbp4', 'Celsr2', 'Ccnd2', 'Stx1a', 'Mfap2', 'Foxp2', 'Csdc2', 'Cnp', 'Mcam', 'Sox4', 'Ddr1', 'Efnb1', 'Zfp521', 'Dusp8', 'Thtpa', 'Fam171a2', 'Auts2', 'Col8a2', 'Chst1', 'Zfp827', 'Lzts2', 'Nlgn2', 'Cryab', 'Ric8b', 'Nfia', 'Cm…	97	NA
Hoxb8	'Hoxa7', 'Hoxb8', 'Hoxb6', 'Enpp5', 'Itpr1', 'Phyhipl', 'Mecom', 'Hoxa9', 'Cd164l2', 'Hoxc6', 'Hes1', 'Dhrs3', 'Arid3a', 'Irx1', 'Tanc1', 'Hoxb7', 'Hoxc9','Hoxb7', 'Hoxb8', 'Aqp3', 'Dkk2', 'Fxyd2', 'Hoxb6', 'Sox11', 'Hoxa7', 'Hoxc10', 'Runx1t1', 'Tubb3', 'Hdgfrp3', 'Hoxb2', 'Hoxb4', 'Mecom', 'Kctd1', 'Prrx1', 'Hoxa9', 'Sall2', 'Meis1', 'Reep1', 'Actb', 'Lmo1', 'Hoxc6', 'Igf2bp3', 'Pknox2', 'Kctd1…	92	NA
Max	'Nr6a1', 'Max', 'Enkur', 'Ctdp1', 'Arl2bp', 'Dach1', 'Gabarapl2', 'Phc2', 'Klf13', 'Pdrg1', 'Mxd1', 'Ube2b', 'Phyhipl', 'Fhl3', 'Scrg1', 'Foxp4', 'Bbip1', 'Nfatc2', 'Pwwp2a', 'Syne1', 'Tmem164', 'Sdk2', 'Sun2', 'Ankrd12', 'Rnf2', 'Lrp8', 'Rbm33', 'Eno1', 'Tmc6', 'Pdss2', 'Khdrbs1', 'Foxo1', 'Rbm15b', 'Ppp1r1b', 'Arpc5', 'Fgd4', 'H3f3a', 'Dnajc8', 'Bbc3', 'Sfmbt2', 'Traf3ip3', 'Dyrk2', 'Fam117a', …	87	NA
Nr1d1	'Dbp', 'C1qtnf4', 'Pde5a', 'Nr1d1', 'Kctd15', 'Ulk1', 'Grem2', 'Gria3', 'Nr1d2', 'Kcnk2', 'Yap1', 'Tcf21', 'Pamr1', 'Arhgef5', 'Ddx3y', 'Tacc2', 'Pard3', 'Tead3', 'Wnt2', 'Fam135a', 'Pfkfb2', 'Nab1', 'Smyd2', 'Ptpn3', 'Pknox2', 'Usp6nl', 'Ppm1a', 'Ephb3', 'Clock', 'Ammecr1l', 'Egflam', 'Csdc2', 'Sh3d19', 'Me1', 'Amph', 'Vegfa', 'Cdh11', 'Mapkbp1', 'Zbtb7a', 'Atn1', 'Osr1', 'Twf1','Dbp', 'Nr1d1', …	73	NA
Foxq1	'Slc39a8', 'Igf1r', 'Slc38a3', 'Krt23', 'Net1', 'Dusp4', 'Slc14a1', 'Ctse', 'Trim13', 'AI661453', 'Stard10', 'Erbb2', 'Vill', 'Slc39a10', 'Ptpn3', 'Slc5a6', 'Pef1', 'Tnfrsf19', 'Spock2', 'Baiap2l1', 'Tgfa', 'Foxc1', 'Asb4', 'Agfg1', 'Hes1', 'Rnf144b', 'Pgap2', 'Hook2', '1110034G24Rik', 'AU021092', 'Saa3', 'Sgpl1', 'Slc25a33', 'Spag4', 'Ocln', 'Bmp3', 'Slc40a1', 'Nebl','Klf5', 'Sema4b', 'Bmp7', 'V…	64	NA
Hivep1	'Zc3h12a', 'Gdpd5', 'Cd69', 'Gatad2a', 'N4bp1', 'Stard8', 'Tank', 'Tifa', 'Mtmr4', 'Nedd4l', 'Zbtb46', 'Rftn1', 'Pld1', 'Etl4', 'Gse1', 'Pld2', 'Fbxo10', 'Parp11', 'Ptpn21', 'Msl3l2', 'Fry', 'Mcoln2', 'Ctbs', 'Auts2', 'Osbpl3', 'Rnf6', 'Relb', 'Mylk', 'Chdh', 'Adcy7', 'Rassf4', 'Hivep2', 'Ctdsp1', 'Smg7', 'Pdlim5', 'Sox13', 'Thtpa', 'Cask', 'Lama4', 'Ppfibp2', 'Ncoa2', 'Myo18a', 'Ezh1', 'Stc1', '…	61	NA
Hivep2	'Appl1', 'Relb', 'Fchsd2', 'R3hdm2', 'Ankhd1', 'Ctgf', 'Trio', 'Rc3h2', 'Nr4a2', 'Col11a2', 'Setd5', 'Ube2h', 'Ubr5', 'Itga5', 'Sesn2', 'Cdk17', 'Hivep2', 'Osmr', 'Gnb1', 'Rrad', 'Plec', 'Fry', 'Acan', 'Ccnl1', 'Ddx17', 'Jak2', 'Wac', 'Zbtb1', 'Fam83g', 'Plekha3', 'Chic2', 'Brd2', 'Clic4', 'Il6st', 'Rara', 'Ets1', 'Moxd1', 'Xist', 'Arl6ip5', 'Kdm6b', 'Slc5a3', 'Epc1', 'Dirc2', 'Gjc1', 'Ebf1', 'El…	60	NA
Klf13	'Rara', 'Ccnd2', 'Atxn7l3', 'Gnb2', 'Flna', 'Fmnl1', 'Klf3', 'Vasp', 'Max', 'Srgap2', 'Trim8', 'Emp3', 'Fbxl19', 'Zmiz1', 'Ppp1r9b', 'Zfp740', 'Ppm1j', 'Elk3', 'Agpat4', 'Gnai2', 'Arhgap9', 'Rassf5', 'Bbc3', 'S100a10', 'Zfp217', 'Csnk1g1', 'Myl6', 'Arf3', 'Sept9', 'Stk38', 'Nod1', 'Camkk2', 'Cdc42ep3', 'Cic', 'Clic1', 'Maml2', 'Sertad3', 'AI413582', 'Mbnl1', 'Gsk3b', 'Atp1a3', 'Tmc6', 'Erg','Klra…	56	NA
Pitx1	'Isl1', 'Tpm2', 'Klc3', 'Ndufa4l2', 'Pitx1', 'Barx2', 'Pkp3', 'Ctnnbip1', 'Wnt4', 'Gtf2ird1', 'Tuba8', 'Eif1ax', 'Lpin3', 'Cish', 'Ephb6', 'Frat2', 'Clip1', 'Bbs2', 'Jup', 'Igsf9', 'Il1f9', 'Cast', 'Megf9', 'Ptk7', 'Ola1', 'Slc26a2', 'Krt10', 'Cpne5', 'Fam57a', 'Polr3g', 'Capn1', '4931428F04Rik', 'Chl1', 'Dohh', 'Tubb3', 'Fabp5', 'Prdm1', 'Ptges', 'Slc25a29', 'Aldh3b2', 'Zfp185', 'Hspb8', 'Acsbg1…	55	NA
Prrx2	'Nfatc1', 'Dkk2', 'Ntrk2', 'Mdga1', 'Omd', 'Lox', 'Scara3', 'Creb3l1', 'Fzd2', 'Col12a1', 'Tgfbr3', 'Twist2', 'Zcchc24', 'Gli3', 'Wfdc1', 'Lgals1', 'Nfix', 'Rspo3', 'Fn1', 'Col1a2', 'Tmem65', 'Loxl2', 'Creb5', 'C1qtnf6', 'Fzd1', 'Fam102b', 'Atp10a', 'Meg3', 'Rhobtb3', 'Kri1', 'Mrc2', 'Htra1', 'Islr', 'Col1a1', 'Matn2', 'Loxl3', 'Kdelr3', 'Sfrp2','Ifi205', 'Prrx2', 'Serpinf1', 'Kazald1', 'Col1a1',…	54	NA
Rb1	'Srsf1', 'Smc3', 'Hist1h2bj', 'Hist1h2ag', 'Fryl', 'Nipbl', 'Dcaf6', 'Sdccag8', 'Zcchc6', 'Wdr44', 'Stk10', 'Ralgapa2', 'Ubap2l', 'Mrpl37', 'Sertad2', 'Ehbp1', 'Mmgt1', 'Mau2', 'Arl3', 'Rb1', 'Nubp1', 'Ctdspl2', 'Snrk', 'Hist1h3i', 'Pkp4', 'Abi1', 'Nup50', 'Hltf', '2510009E07Rik', 'Mink1', 'Abl1', 'Zfp553', 'Lrrc58', 'Sox2', 'Kif11', 'Khnyn', 'Phf23', 'Tnks2', 'Zbtb10', 'Acbd7', 'Osbpl2', 'Zw10',…	53	NA
Rfxank	'Letm2', 'Nog', '1700109H08Rik', 'Srl', 'Nek3', 'Actr6', 'Ctu1', 'Poli', 'Fitm2', 'Ints3', 'Lysmd4', 'Ccdc17', 'Camk2a', 'Efnb3', 'Ndrg4', 'Plekha7', 'Tubgcp6', 'Nsun4', 'Angpt1', 'Asb2', 'Clasp1', 'Zfp770', '4931414P19Rik', 'Cant1', 'Lin54', 'Map2k5', 'Aldh1b1', 'Mtr', 'Zfp574', 'Sspn', 'Cnot8', 'Pcmtd2', 'Fbxw7', 'Pde1c', 'Fkrp', 'Klhl26', 'Dyrk1b', 'Asb8', 'Hpgds', 'Slc25a15', 'Smarcad1', 'Gtf…	53	NA
Zbtb17	'Sox10', 'Fbrs', 'Efhd2', 'Aldh1a3', 'Tnni3', 'Eps8l1', 'Tmem158', 'Rala', 'Slc4a8', 'Cd3eap', 'Arf6', 'Mycn', 'Sf1','Nf1', 'Ncoa2', 'Slc25a23', 'Nbea', 'Pgm5', 'Dlg3', 'Lrp12', 'Fgfbp3', 'Dcaf5', 'Camk2n2', 'Myo1g', 'Gata3', 'Tarsl2', 'Sec16a', 'Arhgap26', 'Larp1', 'Eml4', 'Iqcd', 'Mbd5', 'Rngtt', 'Lin52', 'Rfxank', 'Sertad1', 'Ncor2', 'Zfhx2', 'Paip2b', 'Kpna3', 'Pde4a', 'Mecp2', 'Strada', 'Daa…	51	NA
Nr1h2	'Zfp512', 'Pnpla2', 'Lipe', 'Sbno2', 'Pcdh1', 'Ctbp2', 'Rgl2', 'Inpp5a', 'Pnpla6', 'Parp6', '2410002F23Rik', 'Rhot1', 'Sigirr', 'Cant1', 'Acvrl1', 'Lca5', 'Zfp787', 'Xab2', 'Mark4', 'Stard3', 'Ptp4a3', 'Nrarp', 'Arhgef2', 'N4bp3', 'Chn2', 'Tbkbp1', 'Camta1', 'Hspa12b', 'Agpat1', 'Camk2g', 'Nes', 'Plvap', 'Parvb', 'Pigv', 'Pear1', 'Rmnd5b', 'Dctn1', 'Phrf1', 'Vps37c', 'Tinagl1','Bre', 'Mospd1', 'D…	48	NA
Gli3	'Dtx3', 'Gpm6b', 'Postn', 'Tpbg', 'Acbd7', 'Rhoq', 'Nlgn2', 'Rhbdf1', 'Nfix', 'Twist2', 'Flrt2', 'Igfbp5', 'Dclk1', 'Vasn', 'Pdgfrb', 'Frmd6', 'Ahi1', 'Dlg4', 'Inhba','Pgf', 'Vcan', 'Peg3', 'Fgf2', 'Pkdcc', 'Nlrp3', 'Loxl2', 'Zfp362', 'Ptn', 'Slit3', 'Col8a2', 'Qser1', 'Capn6', 'Gli3', 'Lrrc17', 'Tgfb2', 'Fam198b', 'Boc', 'Gpr153', 'Fgfr1', 'Ski', 'Dlk1', 'Zfyve9', 'Ddr2', 'Arhgap24'	44	NA
Sox5	'Ppp2r2b', 'Mdk', 'Dact3', 'Zfp507', 'St7', 'Eif1b', 'Ift81', 'Hsd11b1', 'Col12a1', 'Dock7', 'Fancf','Mapk6', 'Tmem218', 'Tnrc18', 'Hdac9', 'Srgap1', 'Ift57', 'Osbp', 'Rdx', 'Mxra8', 'Mtdh', 'Cebpg', 'Cry1', 'Eif1', 'Penk', 'Cxxc5', 'Zfp644', 'Tmsb15b1', 'Wdr35', 'Arl13b', 'Ppp3ca', 'Tmem144', 'Ddit3', 'Sertad2', '1110020A21Rik', 'Tnpo1', 'Eif5', 'Samd4b', 'Tmem91', 'Tor1aip1', 'Hax1', 'Ing1'	42	NA
Meis1	'Hoxb5', 'Hoxa5', 'Ednrb', 'Hand2', 'Vat1', 'Pitx2', 'S1pr2', 'Rspo3', 'Meis1', 'Tcf21', 'Fam174b', 'Pcdh18', 'Pitx1', 'Angpt1', 'Hic1', 'Meis2', 'Hoxb4', 'Runx1t1', 'Gpc3', 'Wnt5a', 'Emid1', 'Sema3a', 'Tnfrsf19', 'Ptn', 'Tshz2', 'Arhgap28', 'Kcnk2', 'Samd5', 'Nr2f2', 'Laptm4b', 'Epha7', 'Map2k5', 'Qsox2', 'Pbx1', 'Plekha6', 'Gata2', 'Cxcl12', 'St6galnac3', 'Rbp1', 'Slc9a5'	40	NA
Tcf3	'Prpf3', 'Mta2', 'Poll', 'Arpc5l', 'Ap1m1', 'Zbtb12', 'Hnrnpd', 'Nup214', 'Mrpl43', 'Mad2l1bp', 'Sf3a3', 'Foxred1', 'Tmem138', 'Ubap2l', 'Cnp', 'Zfp362', 'Pars2', 'Zfp553', 'Tyw1', 'Usp11', 'E2f4', 'Btbd1', 'Snx12', 'Ppp1r7', 'Snip1', 'Nubp2', 'Fiz1', 'Mgat1', 'Exosc3', 'Mcrs1', 'Usf1','C1galt1', 'Siglecg', 'Vpreb1', 'Pafah1b3', 'Cdc25b', 'Cd79b', 'Lrmp', 'Bach2', 'Plekhf2'	40	NA
Hand2	'S1pr2', 'Tbx18', 'Thbs2', 'Ccdc80', 'Lefty1', 'Glt8d2', 'Axl', 'Arap1', 'Ddr2', 'Mgp', 'Tgfb3', 'Ddah2', 'Lum', 'Dpt', 'Pde1a', 'Polr3gl', 'Gsn', 'Mdk', 'Parp3', 'B3gnt8', 'Chst14', 'Dcn', 'Plagl1', 'Sfrp2', 'Col3a1', 'Ndufa4l2', 'Acvr1', 'Kazald1', 'Zeb1', 'Ccng2','Klhdc8b', 'Tnnt2', 'Art4', 'Ltbp4', 'Myl7', 'Eln', 'Des', 'Bmp4', 'Rgs5'	39	NA
Nr2f1	'Myh11', 'Nr2f1', 'Dmd', 'Pbx1', 'Sh3bgr', 'Lhfp', 'Fam178b', 'Slc4a3', 'Ntrk3', 'Speg', 'Cog7', 'Wnt6', 'Camk2g', 'Fxyd1', 'Plp1', 'Usp2', 'Crispld2', 'Msl3l2', 'Sema3b', 'Daam2', 'Tpm2', 'Emilin1', 'Angptl2', 'Ppm1l', 'Smarcd3', 'Ntm', 'Afap1l2', 'Abl1', 'Olfm1', 'Zfp532','Vcan', 'Cntfr', 'Nr2f1', 'Rftn2', 'Lpar1', 'Cdh11', 'Gpm6a', 'Sspn'	38	NA
Barx2	'Lmo1', 'Epha1', 'Vangl2', 'Ndufa4l2', 'Pkp3', 'Agap3', 'Plxna2', 'Rarg', '5730559C18Rik', 'Msx2', 'Crlf1', 'Ldlrap1', 'AI661453', 'Casz1', 'Pitx1', 'Lrig3', 'Gm973', 'Dapl1', 'Syne2', 'Chl1', 'Ptpn14', 'Sfn', 'Kctd1', 'Mark4', 'Btbd11', 'Itpr3', 'Dynlt3', 'Kctd15', 'Bcl11b', 'Ephb6', 'Vgll4', 'Gas2l1', 'Tacc2', 'Foxk1'	34	NA
Arntl	'Morc2a', 'Trpm7', 'Txlng', 'Ammecr1l', 'Prpf3', 'Atl2', 'Otub2', 'Pgm2l1', 'Snip1', 'Fam53b', 'Tcf12', 'Nars2', 'Vpreb1', 'Rb1cc1', 'Gnai3', 'Ilf3', 'Asb13', 'Lmo4', 'Pafah1b3', 'Gfra1', 'Cecr2', 'Osbpl9', 'Hcfc2', 'Pask', 'Mettl8', 'Snapc3', 'Rab9', 'Vcpip1', 'Bcl7a', 'Rnf19a', 'Mmadhc'	31	NA
Pou3f1	'Plp1', 'Pou3f1', 'Atf3', '2900060B14Rik', 'Aoc3', 'Bcas1', 'Gatm', 'Ing2','Pbx3', 'Smug1', 'Btbd11', 'Specc1', 'Peg10', 'Srcin1', 'Tmeff1', 'Zfp609', 'Cbfa2t2', 'Neurl1a', 'Ppm1l', 'Napg', 'Ddc', 'Ank2', 'Hic2', 'Carns1', 'Vps8', 'Slc6a9', 'Ints4', 'Clasp2', 'Pou3f1'	29	NA
Ahr	'Arrdc4', 'D17Wsu92e', 'Rbbp8', 'Samd4b', 'Dleu2', 'Ctdp1', 'Zbtb44', 'Pipox', 'Arrb1', 'Slk', 'Ctdsp1', 'Pelo', 'Cyp26b1', 'Chmp2a', 'Ccnd1', 'Wwp1', 'Nrn1', 'Etv3', 'Bcl2a1d', 'Tpt1', 'Gtpbp10','Prex2', 'Arrb1', 'Rbak', 'Notch4', 'Trerf1', 'Atf6'	27	NA
Hoxb4	'Pbx2', 'Hoxa7', 'Bcor', 'Hoxa5', 'Hoxb5', 'Dnajc24', 'Dach1', 'Cnksr3', 'Sgk3', 'Rpia', 'Camkk2', 'Hoxb4', 'Zbtb7b', 'Sp4', '2700081O15Rik', 'Amz2', 'Carf', 'Wipf2', 'Cnot3', 'Ranbp9','Mlec', 'Bhlhe41', 'Baz1b', 'Pcsk5', 'Tk2', 'Rtn4rl1', 'Angpt1'	27	NA
Pou2f1	'Pou2f1', 'Sin3a', 'Ap4e1', 'Fgd3', 'Ar', 'Traf3ip1', 'Tnrc6a', 'Ube2w', 'Gabpb2', 'Zfp518a', 'Tmed8', 'Whrn', 'Exoc4', 'Car1', 'Phf12','Pou2f1', 'Hdac9', 'Sin3a', 'Ubtf', 'Nek3', 'Otud4', 'Trim68', 'Aars2', 'Poc1b', 'Appbp2', 'Cldn12', 'Dennd1a'	27	NA
Pbx1	'Meis2', 'Irx3', 'Pbx1', 'Gpc4', 'Dkk2', 'Lmo4', 'Tceal8', 'Nr2f2', 'Dram1', '6430548M08Rik', 'Obsl1', 'Myh10', 'B430306N03Rik', 'Dtd1', 'Meis1', 'Ltbp3', 'Ckap4', 'Gng12', 'Igfbp5','Pamr1', 'Zfp503', 'Tcf21', 'Tbx3', 'Antxr1', 'Prss23', 'Pbx1'	26	NA
Mlx	'Rchy1', 'Hectd3', 'Capn7', 'Fam13b', 'Vps72', 'Pla2g6', 'Prkg2', 'Dennd2d', 'Mlx', 'Rasef', 'Tpcn1', 'Mrpl27', 'Taf6l', 'Map3k12', 'Kdm6a', 'Dennd1b', 'Rnf44', '2410131K14Rik', 'Prkag1','H13', 'Mlx', 'Mall', 'Hectd3', 'Cmc1'	24	NA
Tbx3	'Slco2a1', 'Dusp6', 'Apln', 'Hpgd', 'Sox11','Pdlim2', 'Slco2a1', 'Aldh1a1', 'Aldh1a7', 'Krt19', 'Clcn2', 'Wfdc2', 'Vwf', 'Nr2f2', 'Tbx2', 'Itga3', 'Rab11fip1', 'Pcdh1', 'Grem2', 'Tspan13', 'Hoxa10', 'Myof', 'Tmem100'	23	NA
Lhx2	'Pars2', 'Efna2', 'Amot', 'Etv5', 'Prdm16', 'Col11a2', 'Lhx2', 'Nr4a3', 'Gramd1c', 'Sned1', 'Dio2', 'Dlk1', 'Ankrd13b', 'Wif1', 'Whrn', 'Usp21', 'Fzd9', 'Col8a2', 'Nfatc2', 'Tctn3', 'Hapln1', 'Abtb2'	22	NA
Nfe2l1	'Hcfc1r1', 'Tsc22d1', 'Nup153', 'Arhgef12', 'Pard6b', 'Flnb', 'Tmem65', 'Pls3', 'Akt3', 'Habp4', '1700028J19Rik', 'Tesc', 'Ensa', 'Specc1l','Tead1', 'Per2', '4632427E13Rik', 'Rprd1a', 'Uso1', 'Dnajc1', 'Sec16a', 'Nr2f6'	22	NA
Pura	'6530402F18Rik', 'Phf21a', 'Chd3', 'Gabbr1', 'Phf1', 'Ncdn', 'Zfp687', 'Kcne3', 'Bbx', 'Pura', 'Malat1', 'Zmym4', 'Trim39','Gnb2', 'Zmynd8', 'Shf', 'Fam46c', 'Lekr1', 'Napa', 'Spred2', 'Malat1', 'Nsmce4a'	22	NA
Gtf2ird1	'Gtf2ird1', 'Wipf2', 'Sin3a', 'Rpgrip1', 'Tbc1d5', 'Msh5', 'Cdc7', 'Sorbs1', 'Lrig2', 'Papd4', 'Pwwp2a', 'Zw10', 'Tuft1', 'Hmg20b', 'Ankhd1', 'Xpo4', 'Sympk', 'Kif3b'	18	NA
Mecom	'Elf5', 'Tsc22d1', 'Gata6', 'Sdcbp2', 'Qsox1', 'Mecom', 'Gnas', 'Socs2','Atp1b1', 'Scnn1a', 'Aldh1a7', 'Itga3', 'Hist1h1d', 'Vsig2', 'AA986860', 'Lmo7', 'Dram1', 'Gprc5a'	18	NA
Vdr	'Fxyd2', 'Baiap2l2', 'Mttp', 'Elf3', 'Anpep', 'Pigr', 'Ttc36', 'Ckmt1', 'Fbp2', 'Espn', 'Fabp1', 'Apoa1', 'Gpx2', 'Maoa', 'Cda', 'Retsat', 'Bdh1', 'Ppp1r1b'	18	NA
Fhl2	'Fam167a', 'Speg', 'Sox10', 'Etv4', 'Ndrg4', 'Arhgef19', 'Il11', 'Myl6', 'Nrtn', 'Gjb3', 'BC022687', 'Ank1', 'Apobec2', 'Fbxo42', 'Emid1', 'Smtn', 'Myl9'	17	NA
Rbpj	'Zfp516', 'Pid1', 'Dab2', 'Etv3', 'Ccl2', 'Slamf9', 'Gfra2', 'Fam49a', 'Stard8', 'Tgfbi','Rpgrip1l', 'Ophn1', 'Prkab2', 'Fastkd5', 'Slamf9', 'Etv3'	16	NA
Rfxap	'Pin1', 'Ywhaq', 'Lmo1', 'Fam167a', 'Psrc1', 'Csnk1d', 'Cngb1', 'Ccdc163', 'Pard6a', 'Lsm14b', 'Crip1', 'Dcun1d5', 'Rfxap','Dnajc16', 'Ncoa5'	15	NA
Hdac1	'Vta1', 'Gtf2f1', 'Fam192a', 'Ubtf', 'Taf15', 'Ywhah', 'Hnrnpu', 'Cdc37', 'Fip1l1', 'Taf6', 'Trp53', 'Ddx20', 'Hdac1'	13	NA
Stat4	'Satb1', 'Lfng', 'Tagap', 'Arhgap9', 'Laptm5', 'Nkg7', 'Cytip','Bin3', 'Nkg7', 'Cbl', 'Itsn2', 'Tmsb10', 'Baz1a'	13	NA
Hmgb2	'Hist1h1e', 'Hmgb2', 'Cenpf', 'Hist1h1b', 'Mxd3', 'Hist1h1a', 'Plk1', 'Aurkb', 'Aurka', 'Ccnb2'	10	NA
Mnt	'Eif5a2', 'Morc2a', 'Hsf2', 'Mepce', 'Mnt', 'Brdt', 'Dnajc16', 'Dhx37', 'Snrnp48', 'Smndc1'	10	NA
Rora	'Arl3', 'Fam20a', 'Nfic', 'Rdx', 'Dnajb4', 'Smarca2', 'Fxyd6', 'Tgfb2', 'Cd99l2', 'Uba3'	10	NA
Sall2	'Gap43', 'Mex3a', 'Tuba1a', 'Sox11', '2610203C20Rik', 'Tubb2b', 'Zc4h2', 'Tmem132a', 'Samd14', 'Hmgn3'	10	NA
Gtf2i	'Chd3', 'Ikzf2', 'Lef1', 'Klk8', 'Elovl6', 'Ss18', 'Mgea5', 'Zfhx2', 'Cnst'	9	NA
Zfp668	'Tars2', 'B330016D10Rik', 'Acbd3', 'Prkag1', 'Sdhaf1', 'Ccdc94', '4921524J17Rik', 'Zfp668', 'Gtf3a'	9	NA
Nfatc3	'Dcaf15', 'Phkg2', 'Zfp646', 'Eapp','Dusp8', 'Btbd7', 'Polr3b', 'E2f3'	8	NA
Rfx1	'Tasp1', 'Rpp38', 'Dcaf15', 'Ctu1', 'Zfp653', 'Slc35b3', 'Mef2d', 'Rfx1'	8	NA
Sox6	'Mapk6', 'Sox6', 'Kif21a', 'Cxxc5', 'Fdft1', 'Sgms2', '1600020E01Rik', 'Arl4a'	8	NA
Zfpm1	'Car2', 'Arhgap32', 'BC030867', 'Car1', 'Slc14a1', 'Styx', 'Ficd', 'Zfp148'	8	NA
Hmga1	'Hoxa9', 'Pabpc1', 'Hmga1', 'Trim7', 'Cdk6', 'E2f3'	6	NA
Tfcp2	'Zfp507', 'Clec16a', 'Galnt1', 'Usp46', 'Intu', 'Tex9'	6	NA
Ar	'Zbtb20', 'Ar', 'Col5a3', 'Serping1', 'Fam198b'	5	NA
Hmgb1	'Hmgb3', 'Ank1', 'Hmgb1', 'Ccnd2', 'Cdc25b'	5	NA
Mxd1	'Nfe2', 'Osm', 'AA467197', 'Cxcr2', 'Prdm1'	5	NA
Nr6a1	'Nr6a1', 'Acbd7', '1110017D15Rik', 'Dlg3', 'Polr1a'	5	NA
Sp100	'Irf2', 'Ppp1r12a', 'Fli1', 'Bin1', 'Klf2'	5	NA
Bach2	'D930015E06Rik', 'Bach2', 'Gpr183', 'Foxp1'	4	NA
Foxm1	'Prr11', 'Tacc3', 'Ttk', 'Ska1'	4	NA

## Sheet: Regulon_TM10x
Regulon	GeneComposition(All_atlas_merged)	NumGenes	RegulonModule
Elk3	['Cog3', 'Nr1h2', 'Rnf167', 'Ppp4c', 'Gnai3', 'Ippk', 'Lypla2', 'Gga1', 'Kti12', 'Cdk13', 'Arfip1', 'Arpc2', 'Senp7', 'Ywhab', 'Tsg101', 'Tbc1d22a', 'Sfswap', 'Bcl2l1', 'Zfp410', 'Ccnt1', 'Tssc4', 'Rac1', 'Epn1', 'Atg16l1', 'Kctd2', 'Ss18', 'Fbxo28', 'Mta2', 'Cap1', 'Rab11a', 'Mfap1b', 'Dzip3', 'Slc25a46', 'Csnk1g1', 'Map3k7', 'Trip4', 'Dpp8', 'Usf1', 'Tmbim6', 'Nosip', 'Zcchc6', 'Cradd', 'Hnrnpd…	2211	1
Cebpb	['Chac1', 'Slc7a11', 'Il6ra', 'Dram1', 'Prrx1', 'Actb', 'Per1', 'Rara', 'Ptx3', 'Rnf149', 'Twist2', 'Samd4', 'Pparg', 'Jun', 'Lmo4', 'Trib1', 'Aldh3b1', 'Steap4', 'C3', 'Dlg4', 'Scara3', 'Nfkbiz', 'Il1rn', 'Ccr2', 'Prkg1', 'Il1b', 'Adamts5', 'Arrdc3', 'Sirpa', 'Lrrfip2', 'Slc11a1', 'Tspan13', 'Osmr', 'Tac1', 'Flot1', 'Dbp', 'Rgs18', 'Speg', 'Trf', 'Mmp9', 'Hpse', 'Pdgfra', 'Actn1', 'F630028O10Rik…	1371	1
Crem	['Ube2h', 'Braf', 'Aig1', 'Btbd9', 'Vps37b', 'Tiprl', 'Usp36', 'Dok2', 'Kdm2b', 'Arih1', 'Zfp593', 'Stx5a', 'Gas5', 'Mzt2', 'Heca', 'Ell2', 'Adnp2', 'Hhip', 'Spag9', 'Josd1', 'Rps29', 'Fdxacb1', 'Calm2', 'Ttc19', 'Stk19', 'Rheb', 'Dhx40', 'Opa3', 'Ahr', 'Gan', 'Nol10', 'Thada', 'Ypel5', 'Pard6a', 'Gla', 'Mxd1', 'Fam134b', 'Aff4', 'Slc35e1', 'Cbwd1', 'Ppp2ca', 'Rel', 'Golph3', 'Map1lc3a', 'Tspan13…	917	1
Irf1	['Rsad2', 'Rtp4', 'Usp18', 'Irf2', 'Ifit3', 'Cxcl10', 'Tcirg1', 'Dnpep', 'Isg15', 'Il15ra', 'Dusp10', '1700056E22Rik', 'Dkk2', 'Rbck1', 'Socs1', 'Rasgrp3', 'Cdkn1c', 'Parp14', 'Gas5', 'Bst2', 'Ccnt2', 'Oasl1', 'Cd274', 'B2m', 'H2-K2', 'Bdnf', 'Rapgef4', 'Plekha3', 'Pik3r3', 'Erap1', 'Ifit1', 'Map3k8', 'Cnksr3', 'H2-K1', 'Myd88', 'Xaf1', 'H2-Q6', 'Ccnd1', 'Pla1a', 'Apbb2', 'Sgk1', 'Arid4b', 'Cdipt…	807	1
Ets2	['Tjp2', 'Prkab1', 'Arhgap27', 'Cldn7', 'Las1l', 'Gata3', 'Vsig10', 'Liph', '1810011O10Rik', 'Adam10', 'Shoc2', 'Hyal2', 'U2af2', 'Rpl28', 'Tpm3', 'Hbegf', 'Pabpn1', 'Hmg20a', 'Map3k11', 'Zfp408', 'Hdac7', 'Trim41', 'Tanc1', 'Bag6', 'Fosl2', 'Eaf1', 'Pcdh17', 'Pigm', 'Ywhab', 'Zfp410', 'Tead2', 'Sema4c', 'Ss18', 'Rer1', 'Tnfrsf1a', 'Txnip', 'Myo1c', 'Rpl37', 'AU019823', 'Etv3', 'Zcchc6', 'Ippk', …	723	1
Mafb	['Srxn1', 'Mmp13', 'Fchsd1', 'Fam83g', 'Aldoa', 'Lpin3', 'Htatip2', 'Tmem54', 'Cd68', 'Arap2', 'Fam110a', 'Tmem37', 'Tmem40', 'Gdpd3', 'Dmpk', 'Prss36', 'Fam25c', 'Gja1', 'Tbxas1', 'Cd14', 'Ctnna1', 'P2ry6', 'Ankrd22', 'Ccl24', 'Dmkn', 'Txn1', 'Ywhag', 'Mal2', 'Prdx1', 'Sec16b', 'Vav3', 'Rab27b', 'Pisd', 'Dstn', 'Il1rn', 'Trib1', 'Zbtb7b', 'Phlda2', 'Adrm1', 'Mark2', 'Kctd11', 'Fos', 'Vit', 'Sprr…	669	1
Bach1	['Mthfr', 'Atg3', 'Gla', 'Picalm', 'Atp6v0b', 'Nptn', 'Gabarap', 'Mfsd1', 'Ubn1', 'Rragc', 'Brox', 'Osbpl8', 'Atp6v0d1', 'Dolk', 'Mafg', 'Gtf2h1', 'H2afz', 'Mbtd1', '2310022A10Rik', 'Fnip1', 'Rab3il1', 'Tpp1', 'Dleu2', 'Mfsd7c', 'Tnfaip3', 'Slc25a33', 'Rps6ka4', 'Sik3', 'Lamp1', 'Lats2', 'Gnb2', 'Dusp1', 'Cltc', 'Taf4b', 'Cry1', 'Batf3', 'Atp6v1a', '6430548M08Rik', 'Trim25', 'Lmnb1', 'Avpi1', 'Da…	655	1
Cebpd	['Dram1', 'Ddit3', 'Jun', 'Ace', 'Peli2', 'Vim', 'Fos', 'Rhob', 'Svep1', 'Twist2', 'Fermt2', '1700112E06Rik', 'Creb5', 'Nfib', 'Ptx3', 'Pycr1', 'Runx1t1', 'Lox', 'Gnas', 'Smad7', 'Osmr', 'Lmo4', 'Dlg4', 'Spry4', 'Thra', 'Steap4', 'Tac1', 'Adamts5', 'Prnp', 'Actn1', 'Pdgfrb', 'Inhba', 'Pdgfra', 'Mesdc1', 'Ctbp2', 'Sh3gl1', 'Osr1', 'Sept2', 'Il6', 'Mat2a', 'Zfhx2', 'Ncam1', 'Sntb2', 'Morf4l2', 'Csn…	637	1
Foxo1	['Trim8', 'Nfatc1', 'Cadm1', 'Nr4a2', 'Pan3', 'Peli2', 'Pop5', 'Prrx1', 'Dixdc1', 'Sh2b3', 'Trib1', 'Atxn7l1', 'Samd4', 'Prdm16', 'Igfbp3', 'Ddit4', 'Nek7', 'Tsc22d4', 'Foxp1', 'Trib2', 'Nfatc2', 'Atxn1', 'Zfhx2', 'Azin1', 'Ppp3ca', 'Hivep2', 'Btg1', 'Rnf2', 'Pim2', 'Inppl1', 'Chst11', 'Zfp36l1', 'Ep300', 'Prkd2', 'Rnf19b', 'Cdkn2aip', 'Sh3bp1', 'Stag2', 'Cd109', 'Zhx2', 'Zfp36l2', 'Mtus1', 'Tsc1…	603	1
Bcl3	['Nfkb2', 'Cxcl10', 'Nfkbiz', 'Tnfaip3', 'Nfkbia', 'Map3k8', 'Relb', 'Rel', 'Cxcl1', 'Neurl3', 'Hivep2', 'Gadd45b', 'Icam1', 'Sdc4', 'Cxcl2', 'Stx11', 'Ebf1', 'Mapk6', 'Steap4', 'Tnip1', 'Nr4a2', 'Ptms', 'Il1f9', 'Myo1e', 'Dennd4a', 'B2m', 'Camta1', 'Tfpi2', 'Rras', 'Il6', 'Csf1', 'Irf1', 'H2-D1', 'Egr2', 'Prps1', 'Jak2', 'Ccnl1', 'Tnfaip2', 'Actn1', 'Nab1', 'Cd93', 'Osmr', 'Casp4', 'Cxcl9', 'Rnd…	564	1
Cebpa	['Il6ra', 'Rbp4', 'Rad23b', 'Dram1', 'Wfdc2', 'Krt23', 'Itpr3', 'Aqp9', 'Rnf149', 'Homer2', 'Ccl3', 'Steap4', '1700112E06Rik', 'Foxa2', 'Fbxo3', 'Zbtb44', 'Slc35d1', 'Hsd11b1', 'Herpud1', 'Il1rn', 'Hpse', 'Ccr2', 'Il1b', 'Fam129b', 'Klf5', 'Ak4', 'Ftl1', 'Gars', 'Nadk', 'Slc34a2', 'Slpi', 'Dmkn', 'Nr1h3', 'Hnrnpul2', 'Glrx5', 'Trf', 'Esrra', 'Psat1', 'Rarres1', 'Slc11a1', 'Krt10', 'Pus10', 'Sbsn'…	553	1
Nfil3	['Dusp1', 'Gla', 'Vps37b', 'Dusp5', 'Errfi1', 'Filip1l', 'Jdp2', 'Dennd5a', 'Jun', 'Heca', 'Creb5', 'Golph3', 'Picalm', 'Rap1b', 'Hsp90ab1', 'Ptpn11', 'Dok2', 'Atl2', 'Tpm4', 'Atxn1', 'Maff', 'Gabarap', '1700084E18Rik', 'Ccl4', 'Tra2a', 'Fnip2', 'Klf6', 'Hivep1', 'Aldh1a2', 'Des', 'Cdk14', 'Camk2n1', 'Bhlhe40', 'Zfp36l1', 'Gpbp1', 'Btg1', 'Rnf19b', 'Fos', 'Pdp1', 'E2f7', 'Plk2', 'Zyx', 'Cnnm4', '…	436	1
Stat3	['Gadd45b', 'Sphk1', 'March5', 'Stat3', 'Taf4b', 'Pprc1', 'Wac', 'Cebpb', 'Crem', 'Bcl3', 'Csrnp1', 'Casp4', 'Ifrd1', 'Tnfaip3', 'Pde4b', 'Itpkc', 'Rara', 'Smox', 'Pcdh17', 'Map2k3', 'Kdm6b', 'Flnc', 'Junb', 'Rela', 'Lmna', 'Hmox1', 'Lamc1', 'Bag3', 'Calm1', 'Ahnak', 'Ctnnal1', 'Mapk6', 'Vim', 'Igfbp6', 'Cyth3', 'Elk3', 'Arc', 'Tnfrsf12a', 'P2rx7', 'Aff1', 'Zfp36', 'Eif5', 'Ptp4a2', 'Slc38a2', 'I…	386	1
Tgif1	['Vps37b', 'Dusp1', 'Ell2', 'Josd1', 'Cnnm4', 'Ppp2ca', 'Tmem59l', 'Zfp593', 'Btg2', 'Senp2', 'Nup98', 'Areg', 'Trib1', 'Relb', 'Gas5', 'Usp36', 'Dnttip1', '9530068E07Rik', 'Opa3', 'Zbtb11', 'Nr4a2', 'Kif5c', 'Gprc5a', 'Sidt2', 'Taf4b', 'Cxcl16', 'Maff', 'Golph3', 'Creb3l2', 'Rcan1', 'Fn1', 'Ppp1r15a', 'Cldn7', 'Arl5b', 'Ubn1', 'Ccdc86', 'Sik3', 'Ntrk2', 'Fbxo33', 'Cstf3', 'Foxp2', 'Epha2', 'Wsb1…	324	1
Rela	['Nfkb2', 'Nfkbia', 'Cxcl10', 'Icam1', 'Relb', 'Map3k8', 'Cxcl1', 'Cxcl2', 'Cfl2', 'Tnip1', 'Mapk6', 'Irf1', 'Casp4', 'Stx11', 'Fas', 'Gabpb1', 'Gnb1', 'Csf1', 'Cxcl9', 'Adamts4', 'Rnd1', 'Itga5', 'Tgif1', 'Bcl3', 'Ube2n', 'Cdkn1a', 'Nck1', 'Pde4b', 'Nova1', 'Sema6a', 'Sulf1', 'Bmp4', 'Gas5', 'Rela', 'Ncam1', 'Arf4', 'Rhoj', 'Rab40c', 'Spred1', 'Cd36', 'Pde1c', 'Fosl1', 'Samd5', 'Prkab2', 'Ubtd1'…	316	1
Mafg	['Hmox1', 'Mafg', 'Fth1', 'Slc48a1', 'Ctgf', 'Ftl1', 'Bcor', 'Mnt', 'Klhl21', 'Zfp36', 'Mgst1', 'Ube2o', 'Mpp5', 'Bcl9l', 'Slc11a1', 'Pfn2', 'Gpd2', 'Fbxo30', 'Lrrfip2', '1190002N15Rik', 'Fxyd3', 'Zfp385b', 'Mllt11', 'Txn1', 'Col11a1', 'Ctsd', 'Zswim6', 'Mvp', 'Tanc1', 'Irf1', 'Pde4d', 'Cttnbp2nl', 'Nfkbiz', 'Tnfrsf1a', 'Akap12', 'Zbtb7a', 'Pafah1b1', 'Necab3', 'Sertad2', 'Ppard', 'Col27a1', 'Wdf…	190	1
Mef2a	['Mef2a', 'Oxr1', 'Polr3gl', 'Cdc42ep2', 'Asap1', 'Appl1', 'B4galt4', 'Pafah1b1', 'Acvr1b', 'Fkbpl', 'Hdac5', 'Arhgef2', 'Spop', 'Cbl', 'Dync1li2', 'Tbc1d20', 'Kif3c', 'Rilpl1', 'St3gal4', 'Zbtb46', 'Styx', 'Trafd1', 'Crebbp', 'Lims1', 'Nr4a3', 'Mest', 'Rara', 'Ckm', 'Cyth4', 'Runx1t1', 'Mef2d', 'Nrgn', 'Ercc1', 'Ahnak', 'Pitpnm2', 'Thap11', 'Tmcc2', 'Mdm4', 'Mga', 'Limch1', 'Cic', 'R3hdm2', 'Zfp…	165	1
Tfe3	['Picalm', 'Bhlhe40', 'Gabarap', 'Tom1', 'Atp2b1', 'Atp6v1a', 'Sirpa', 'Hbp1', 'Hdac5', 'Dirc2', 'Mafg', 'Runx1', 'Lox', 'Tmcc1', 'Dusp3', 'Sox10', 'Kbtbd2', 'Mdfic', 'Ap1s2', 'Dpysl4', 'Tle3', 'Skap2', 'Tet2', 'Dab2', 'Trak1', 'Gpnmb', 'Mum1l1', 'Dennd5a', 'Spg20', 'Vwa5a', 'Sin3a', 'Ctsk', 'Mlph', 'Fnip1', 'Elf4', 'Rara', 'Fam110b', 'Fhad1', 'Snx16', 'Slc7a11', 'Etv5', 'Ddit3', 'Zbtb2', 'Rbms1'…	52	1
Sox17	['Vwf', 'Ptprb', 'Pecam1', 'Tie1', 'Cdh5', 'Cd36', 'Myct1', 'Sdpr', 'Podxl', 'Arap3', 'Apold1', 'Ushbp1', 'Nrarp', 'Ccnyl1', 'Gpihbp1', 'Tinagl1', 'Ppp1r16b', 'Tek', 'E2f7', 'Egfl8', 'Znrf1', 'Itpkb', 'Aplp1', 'Sh3gl3', 'Lrrc8a', '1700084E18Rik', 'Ipo11', 'Fli1', 'Nos3', 'Dock9', 'Spag9', 'Tspan13', 'Pola2', 'Pcdh17', 'Parp9', 'Rapgef2', 'Efnb2', 'Cdkn2aip', 'Rab5c', 'Clec14a', 'Tbcc', 'Dach1', '…	51	1
Klf16	['Mycn', 'Polr2d', 'Syncrip', 'Med26', 'Cox7a2l', 'Rpl41', 'Tra2b', 'Eif3e', 'Eif5a', 'Gas5', 'Rpl39', 'Ppp2r2a', 'Arf6', 'Rgs12', 'Ptma', 'Bcl10', 'Ckmt1', 'Myc', 'Nolc1', 'Impdh2', 'Ubap1', 'Eef1g', 'Aldh1a3', 'Avpi1', 'Cirbp', 'Nxn', 'Apoc1', 'Eef1e1', 'Plk3', 'Blzf1', 'Sf3b4', 'Nhp2', 'Irf6', 'Trappc6a', 'Rpl4', 'Lancl1', 'Tgif2', 'Prpf38a', 'Sox2', 'Mapkapk3', 'Rps13', 'Cbwd1', 'Rfx2', 'Nob1…	105	2
Gata3	['Ikzf2', 'Cd27', 'Ano1', 'Itk', 'Uchl1', 'Sytl2', 'Cd247', 'Txk', 'Dok2', 'Slc14a1', 'Krt18', 'Tes', 'Rbm15b', 'Madd', 'Arhgap1', 'Sh3gl2', 'Lef1', 'Tox', 'Nck2', '4930486L24Rik', 'Pparg', 'Akirin1', 'Leprotl1', 'Urb2', 'Cldn7', 'Arl4c', 'Rai1', 'Rab27b', 'Atp8b1', 'Cdh1', 'Plagl2', 'Lpcat4', 'Sfn', 'Chmp4b', 'Klhl25', 'Mta3', 'Atp6v0a1', 'Lad1', 'Etv3', 'Sc5d', 'Tle3', 'Usp47', 'Sema4a', 'Aff4'…	68	2
Xbp1	['Ube2h', 'Amdhd2', 'Dusp1', 'Ube2b', 'Picalm', 'Pdia5', 'Osbp', 'Atg3', 'Tmem39a', 'Napa', 'Sec16b', 'Mthfr', 'Gmppb', 'Tmem214', 'Mcoln1', 'Scfd1', 'Ssr1', 'Gnptg', 'Uso1', 'Tmed2', 'Rab21', 'Vps33a', 'Ssr4', 'Pdp1', 'Srpr', 'Sec63', 'Sec24c', 'Golga1', 'Klhl12', 'Cuta', 'Nup98', 'Morf4l2', 'Clasp2', 'Asb3', 'Stx5a', 'Mfsd1', 'Nf1', 'Arcn1', 'Tm9sf3', 'Slc35b2', 'Tmem55b', 'Usp31', 'Tiprl', 'Br…	1432	3
Rxra	['Fabp1', 'Apoa1', 'Mttp', 'Agt', 'Psen2', 'Depdc7', 'Gls2', 'Sord', 'Aass', 'Lpin1', 'Aqp9', 'Orm1', 'Apoa2', 'Aldob', 'Pygl', 'Aldh1l1', 'Cyp4v3', 'Acox1', 'Scp2', 'Hmgcs2', 'Zfyve1', 'Etfb', 'Vps54', 'Sec24c', 'Me1', 'Arhgef19', 'Ttc36', 'Grb7', 'Nr2f6', 'Wdr7', 'Rbpms2', 'Lonp2', 'Pfkfb1', 'Hpn', 'Fdx1', 'Dnajc16', 'Zfp384', 'Crls1', 'Pigr', 'Pon3', 'Ddc', 'Adh1', 'Nr1h3', 'Sephs2', 'Aifm2', …	1251	3
Atf4	['Ube2h', 'Tead1', 'Gla', 'Tpm4', 'Spred2', 'Vps37b', 'Zfp593', 'Rcan1', 'Lrrc8a', 'Usp36', 'Ell2', 'Dusp8', 'Fosb', 'Flt1', 'Golph3', 'Kif5c', 'Gas5', 'Epha2', 'Pdlim3', 'Nup98', 'Gem', 'Maff', 'Ppp2ca', 'Opa3', 'Senp2', 'Adnp2', 'Nr4a2', 'Tubb2b', 'Vamp3', 'Btg2', 'Ppp1r15a', 'Cyr61', 'Spag9', 'Appbp2', 'Fbxo33', 'Tmem147', 'Fn1', 'Nfatc2', 'Relb', 'D17Wsu92e', 'Bdp1', 'Stard3nl', 'Abhd16a', 'B…	1142	3
Egr1	['Egr1', 'Dusp5', 'Cachd1', 'Map3k12', 'Cryab', 'Pbx1', 'Ints6', 'Fermt2', 'Tcf7l2', 'Sertad2', 'Socs2', 'Bdnf', 'Maml2', 'Wasl', 'Map4k5', 'Vamp2', 'Tmem158', 'Thbs2', 'Nckap5l', 'Lamc1', 'Cbx6', 'Jun', 'Mafb', 'Ctdsp2', 'Phf21a', 'Igfbp5', 'Midn', 'Erf', 'Brd2', 'Col1a1', 'Cadm1', 'Junb', 'Trim8', 'Hic1', 'Glis2', 'Tshz3', 'Hoxc6', 'Fam53c', 'Atxn2', 'Fzd2', 'Pcgf2', 'Nr2f1', 'Zfp36l1', 'Cbx4',…	1048	3
Atf3	['Fosb', 'Tpm4', 'Arg2', 'Dusp1', 'Lrrc8a', 'Nr4a2', 'Tmem59l', 'Ppp2ca', 'Impdh2', 'Zfp593', 'Ahcyl1', 'Gem', 'Pitx2', 'Btg2', 'Tubb2b', 'Akirin1', 'Cds1', 'Epha2', 'Gprc5a', 'Trib1', 'Ldha', 'Arih1', 'Golph3', 'Isl1', 'Sidt2', 'Zbtb11', 'Ppp1r15a', 'Rab25', 'Clk4', 'Atf3', 'Pmvk', 'Ptp4a1', 'Dusp8', 'Ntrk2', 'Aig1', 'Arl5b', 'Tra2a', 'Jun', 'Avpi1', 'Arl4d', 'Eif1', 'Ythdc1', 'Maff', 'Cldn7', '…	1024	3
Fosl2	['Tpm4', 'Vps37b', 'Heca', 'Dusp1', 'Ell2', 'Fosb', 'Cnnm4', 'Ric8b', 'Avpi1', 'Tmem39a', 'Btg2', 'Flt1', 'S1pr2', 'Dok1', 'Dusp8', 'Rap1b', 'Sik1', 'Gem', 'Trib1', 'Relb', 'Map1lc3a', 'Tubb2b', 'Usp36', 'Opa3', 'Zbtb11', 'Nr4a2', 'Kif5c', 'Daam2', 'Gprc5a', 'Ccnl1', 'Baz2b', 'Sidt2', 'Taf4b', 'Ltbp1', 'Spred2', 'Cxcl16', 'Maff', 'Golph3', 'Rcan1', 'Adnp2', 'Ppp1r15a', 'Plekha4', 'Tubb2a', 'Atl2'…	999	3
Fosl1	['D17Wsu92e', 'Arg2', 'Josd1', 'Bcl2l13', 'Map1lc3a', 'Usp36', 'Pdlim3', 'Ppp2ca', 'Areg', 'Ntrk2', 'Rad23a', 'Trib1', 'Zfp593', 'Cds1', 'Pitx2', 'Maff', 'Akirin1', 'Emd', 'Gas5', 'Gigyf2', 'Pmvk', 'Wdr62', 'Btg2', 'Abce1', 'Anapc10', 'Usp2', 'Plekhh3', 'Appbp2', 'Thoc1', 'Psmb2', 'Senp2', 'Ube2n', 'Fbxo34', 'Homer2', 'Rab25', 'Ubap1', 'Ripk4', 'Zfand5', 'Rnf7', 'Ywhag', 'Otud6b', 'Epha2', 'Rbbp8…	998	3
Klf5	['Ppp2ca', 'Chl1', 'St14', 'Ctf1', 'Kctd15', 'Cldn3', 'Tnks1bp1', 'Coro1c', 'Stxbp2', 'Dohh', 'Fxyd3', 'Wee1', 'Efnb1', 'Iffo2', 'Ctnnbip1', 'Wasl', 'Gtf2f2', 'Rell1', 'Adss', 'Ces1d', 'Tuft1', 'Psmb5', 'Gnb2', 'Sesn3', 'Ppp1r14b', 'Ftsj3', 'Psmc5', 'Tbc1d2', 'Mgst3', 'Erbb2', 'Por', 'Rpl4', 'Cast', 'Pmm1', 'Plekhh3', 'Apoo', 'Wiz', 'Clpb', 'Rps24', 'Nhsl1', 'Baiap2l1', 'Nol7', 'Uba1', 'Cyp2s1', …	906	3
Klf15	['Acss2', 'Hspbp1', 'Gpr155', 'Ap3d1', 'Reep6', 'Prpf8', 'Atf5', 'Zhx1', 'Blvrb', 'Itsn1', 'Tpcn1', 'Fhod1', 'Bcap31', 'Cryzl1', 'Apeh', 'Eepd1', 'Tbl2', 'Sec14l2', 'Lman1', 'Lin52', 'Ift80', 'Adnp2', 'Tmem87b', 'Znrf3', 'Tmub2', 'Lpcat3', 'Pja2', 'Pgrmc2', 'Aldh6a1', 'Adam9', 'Rprd1a', 'Tm2d2', 'Gm2a', 'Pcsk4', 'Rab8a', 'Nmnat3', 'Adk', 'Ap3m1', 'Xpr1', 'Ccl27a', 'Cldn3', 'Car5b', 'Bsdc1', 'Siae…	896	3
Fos	['Fosb', 'Jun', 'Tubb2b', 'Dusp1', 'Atf3', 'Nfkbiz', 'Hoxa10', 'Klf6', 'Fos', 'Btg2', 'Lmo4', 'Egr1', 'Ier2', 'Junb', 'Tmem165', 'Gcc1', 'Sat1', 'Rgs2', 'Neat1', 'Kctd11', 'Tmem65', 'Ctbp2', 'Yif1b', 'Atp2b4', 'Nr4a1', 'Rarg', 'Myd88', 'Rhob', 'Tmem43', 'Klf4', 'Zfp36', 'Ubb', 'Per1', 'Lztfl1', 'St7', 'Cars', 'Pdgfd', 'Papss1', 'Gla', 'Nup98', 'Aldh1a2', '1700112E06Rik', 'Klf9', 'Slc35b1', 'Cdkn2…	866	3
Junb	['Emp3', 'Plec', 'Mpv17', 'Map2k3', 'Lmna', 'Rtn4', 'Anxa1', 'Junb', 'H3f3b', 'Bag3', 'Tagln2', 'Vim', 'Lgals3', 'Bcl9l', 'Dnajb5', 'Calm1', 'Fam129b', 'Epha2', 'Lamc1', 'Slc2a1', 'Elk3', 'Sertad1', 'Ahnak', 'Cav1', 'Itgav', 'Col12a1', 'Timp2', 'Tnfrsf12a', 'Sdc4', 'Mnt', 'Igfbp4', 'Mapre2', 'Mafg', 'Ifrd1', 'Heg1', 'Gtf2ird1', 'Celf4', 'Hcfc1r1', 'Lamb3', 'Kdm6b', 'Bloc1s1', 'Cttnbp2nl', 'Anxa5'…	859	3
Jund	['Samd4', 'Dusp1', 'Fosb', 'Ube2b', 'Azin1', 'Errfi1', 'Heg1', 'Josd1', 'Atf3', 'Jun', 'Creb5', 'Fam76a', 'Picalm', 'Insig1', 'Arg2', 'Ube2n', 'Thra', 'Tmem39a', 'Rap1b', 'Relb', 'Pgrmc2', 'Dkk2', 'Tpm4', 'Klf7', 'Maff', 'Csnk1e', 'Ppp2r2d', 'Gabarap', 'Rce1', 'Lrrc8a', 'Igfbp3', 'Sh3gl1', 'Taf4b', 'Klf6', 'Aldh1a2', 'Rbm15b', 'Cdk14', 'Tpd52l2', 'Chpf', 'Camk2n1', 'Bhlhe40', 'Zfp36l1', 'Tpm1', '…	855	3
Tbx2	['Tial1', 'Cdk5', 'Ncln', 'Prcc', 'Lamtor2', 'Rpgrip1l', '1110004F10Rik', 'Dync1i2', 'Unk', 'Aamp', 'Pnkd', 'Qtrtd1', 'Zc4h2', 'Snapc3', 'Arv1', 'Fyco1', 'Hspa13', 'Vcpip1', 'Ppp1r12b', 'Slc35b4', 'Pcm1', 'Akirin2', 'Napb', 'Actr1a', 'Calcoco1', 'Itpr1', 'Nutf2', 'Smug1', 'Sdccag8', 'Plekha1', 'Ddx49', 'Zmat5', 'Daam1', 'Pdcd10', 'Edem3', 'Tmem115', 'Fbf1', 'Tmtc3', 'Pacrg', 'Hexim2', 'Srprb', 'I…	848	3
Maff	['Ube2h', 'Tpm4', 'D17Wsu92e', 'Dusp1', 'Fosb', 'Ppp2ca', 'Avpi1', 'Zfp593', 'Tmem39a', 'Btg2', 'S1pr2', 'Nup98', 'Dusp8', 'Rap1b', 'Tra2a', 'Abhd16a', 'Gem', 'Trib1', 'Relb', 'Gpm6b', 'Gas5', 'Map1lc3a', 'Tubb2b', 'Usp36', 'Opa3', 'Zbtb11', 'Nr4a2', 'Gprc5a', 'Ccnl1', 'Appbp2', 'Taf4b', 'Ltbp1', 'Spred2', 'Cxcl16', 'Maff', 'Rcan1', 'Adnp2', 'Ptrh1', 'Ppp1r15a', 'Plekha4', 'Cldn7', 'Tubb2a', 'Sta…	840	3
Mitf	['Slc35a5', 'Ube2q1', 'Picalm', 'Serf2', 'Dhx35', 'Nptn', 'Cln3', 'Mal2', 'Arfgef2', 'Tac1', 'Rragc', 'Slc35b2', 'Brox', 'Actn2', 'Fnip1', 'Mfsd7c', 'Pld3', 'Zfp438', 'Ybx2', 'Cltc', 'Rab3il1', 'Lamp1', 'Slc25a33', 'Atp6v1a', 'Naa50', 'Nnt', 'Mms19', 'Batf3', 'Tmeff2', 'Pdp1', 'AA465934', 'Bloc1s1', 'Usp28', 'Extl2', 'Gns', 'Wls', '0610040J01Rik', 'Sorl1', 'Hsf2', 'Socs5', 'Rab21', 'Fbxl5', 'Nrbp…	745	3
Esrra	['Ldhb', 'Fxyd2', 'Steap2', 'Atp1b1', 'Ndufb4', 'Atp5l', 'Cox6c', 'Tcn2', 'Aco2', 'Pdha1', 'Mfap3l', 'Cycs', 'Oxct1', 'Phyhipl', 'Cox7a1', 'Osbpl6', 'Pth1r', 'Pdzk1ip1', 'Kidins220', 'Hnf1b', 'Tmem116', 'Atp6v1a', 'Ndufb8', 'Acss1', 'Galc', 'Acss2', 'Hspbp1', 'Fam160a2', 'Tmem87b', 'Tbl2', 'Rab22a', 'Esrra', 'Ap3d1', 'Axin1', 'Fchsd1', 'Tarsl2', 'Abcd1', 'Pcbp3', 'Ctnnbip1', 'Spa17', 'Fig4', 'Rpr…	718	3
Elf3	['Ppp4c', 'Appl2', 'Fibp', 'Urm1', 'Ube2n', 'Epn1', 'Tsg101', 'Vps25', 'Fam188a', 'Rab11a', 'Arpc5l', 'Pyroxd1', 'Eif3i', 'Erh', 'Shoc2', 'Mark2', 'Pigt', 'Sptlc2', 'Ctnna1', 'Otud7b', 'Kctd5', 'Sec24c', 'Ap1b1', 'Parl', 'Nudt5', 'Cdc123', 'Atp6v1d', 'Txn2', 'Timm23', 'Chchd5', 'Hspa4', 'Arhgap27', 'Erp44', 'Ap3s2', '1110004E09Rik', 'Rpl32', 'Sys1', 'Rnf10', 'Dusp6', 'Vps53', 'Slc39a6', 'Las1l', …	658	3
Nr1h3	['Sec16b', 'C4b', 'Nr1h3', 'Hsd17b11', 'Gsta3', 'Angptl4', 'Comt', 'Aldh1a1', 'Igf1', 'Apoe', 'Ftl1', 'Man2a1', 'Enpep', 'Dmd', 'Cp', 'Tmem150a', 'Rdh11', 'Ghr', 'Abcd2', 'Sqrdl', 'Alg11', 'Rreb1', 'Acaa2', 'Mttp', 'Hmgcs2', 'Lpl', 'Fabp1', 'Tlcd2', 'Aifm2', 'Mmp19', 'Fam13a', 'Pgm2', 'Slc25a47', 'Ttc36', 'Apoa1', 'Ech1', 'Prkd3', 'St7l', 'C2', 'Mmp11', 'P2rx4', 'H2-Q10', '1700018L02Rik', 'Sema4g…	606	3
Mafk	['Nfatc1', 'Nr4a2', 'Ccnyl1', 'Spry4', 'Samd4', 'Ube2f', 'Fosb', 'Fbn1', 'Taf4b', 'Gadd45b', 'Hivep2', 'Nrarp', 'Nr4a1', 'Klf4', 'Ell', 'Sirt1', 'Hexim1', 'Zswim6', 'Azin1', 'Rnf19b', 'Jag1', 'Hspa2', 'Med13', 'Egr1', 'Map4k4', 'Golph3', 'Maff', 'Btg1', 'Cnnm4', 'Nrp2', 'Nras', 'Pdpn', 'Ncam1', 'Map3k8', 'Rheb', 'Dyrk1a', 'Chrnb1', 'Errfi1', 'Plk2', 'Foxp4', 'Gabpb1', 'Nfe2l1', 'Per3', 'Pde1c', '…	567	3
Fosb	['Tead1', 'Sirt1', 'Samd4', 'Dusp1', 'Nfatc1', 'Fosb', 'Gla', 'Ube2h', 'Tubb2b', 'Azin1', 'Adnp2', 'Errfi1', 'Jdp2', 'Atf3', 'Cadm1', 'Jun', 'Golph3', 'Ccnyl1', 'Peli2', 'Picalm', 'Insig1', 'Thra', 'Impdh2', 'Ppp2ca', 'Ptpn11', 'Rbp4', 'Dkk2', 'Opa3', 'Fam53c', 'Atxn1', 'Maff', 'Ppp2r2d', 'Hipk1', 'Hoxa10', 'Tra2a', 'Runx1', 'Igfbp3', 'Epas1', 'Taf4b', 'Klf6', 'Hivep1', 'Aldh1a2', 'Smarca2', 'Plp…	559	3
Nfatc4	['Svep1', 'Prrx1', 'Ccdc80', 'Dkk2', 'Trim8', 'Ssbp2', 'Tpm1', 'Il6st', 'Nnat', 'Rftn2', 'Gadd45b', 'Rnf219', 'Il11ra1', 'Pcgf2', 'Fermt2', 'Armcx3', 'Fndc3b', 'Extl3', 'Nr4a2', 'Samd4', 'Cytl1', 'Fzd7', 'Gli3', 'Ccdc88a', 'Tgfb3', 'Lag3', 'Vegfa', 'Cdk14', 'Dlg4', 'Smad3', 'Cbx5', 'Hoxb2', 'Gng11', 'Cul7', 'Armcx6', 'Osmr', 'Dexi', 'Nfib', 'Stambpl1', 'Tpm2', 'Mdga1', 'Smarcd3', 'Igfbp4', 'Snx33…	548	3
Jun	['Svep1', 'Dkk2', 'Egr1', 'Ssbp2', 'Tpm1', 'Gadd45b', 'Sgk1', 'Isl1', 'Bdnf', 'Plxna2', 'Srsf2', 'Ntf3', 'Ccdc88a', 'Mat2a', 'Nrarp', 'Actg1', 'Zfp503', 'Zfp36l1', 'Dstn', 'Fosb', 'Ctnna1', 'Hic1', 'Wnt2', 'Cdkn2aip', 'Lims2', 'Aldoa', 'Plk3', 'Glg1', 'Hoxa10', 'Per1', 'Sh3gl1', 'Cyr61', 'Irf1', 'Mycn', 'Zfand5', 'Adamts1', 'Tmem55a', 'Ccnd1', 'Fos', 'Slc12a2', 'Sema6d', 'Adamtsl1', 'Pros1', 'Pcg…	540	3
Myc	['Lmna', 'Rtn4', 'Hmox1', 'Itpkc', 'Anxa1', 'Gal', 'H3f3b', 'Bmp1', 'Bag3', 'Tac1', 'Vim', 'Lgals3', 'Brix1', 'Dnajb5', 'Fam129b', 'Lamc1', 'Slc2a1', 'Sertad1', 'Sbsn', 'Tnfrsf12a', 'Nup153', 'Dusp7', 'Csdc2', 'Pcsk6', 'Ifrd1', 'Celf4', 'F3', 'Lamb3', 'Kdm6b', 'Clip4', 'Sema3c', 'Bach1', 'Col5a3', 'Adora2b', 'Zbtb7a', 'Csrnp1', 'Pcolce', 'Tgfbi', 'Gem', 'Spred1', 'Pdap1', 'Gadd45a', 'Flnc', 'Vang…	521	3
Tead2	['Vcl', 'Sh2b3', 'Lman1', 'Tmem5', 'Znrf3', 'Cyth2', 'Unc13b', 'Tspan17', 'Leprot', 'Prpf40b', 'Hdac3', 'Pcbp3', 'Chd6', 'Mospd1', 'Fhod1', 'Slc9a5', 'Ephb3', 'Klhl26', 'Mapk8', 'Sgk1', 'Pdlim7', 'Deptor', 'Stx6', 'Eepd1', 'Rhbdf2', 'Inpp5a', 'Papolg', 'Tsen34', 'B4galt1', 'Slc1a5', 'Acer2', 'Grasp', 'Ankrd27', 'Tmem158', 'Mnt', 'Rab3a', 'Sntb2', 'Psmd12', 'Zfp319', 'Xpnpep1', 'Sertad1', 'Kdr', '…	521	3
Nr2f6	['Ndufa4', 'Ttc36', 'Nr2f6', 'Cox6c', 'Grb7', 'Pipox', 'Hpn', 'Slc25a39', 'Atp5g3', 'Hspa9', 'Ddc', 'Atp5l', 'Aass', 'Slc25a13', 'Suox', 'Chchd10', 'Cpt1a', 'Chdh', 'Stard10', 'Cat', 'Hsd17b4', 'Dhrs4', 'Ephx2', 'Pcca', 'Tmbim6', 'Slc25a15', 'Pafah2', 'Ehhadh', 'Galm', 'Akr7a5', 'Suclg2', 'Acss2', 'Dld', 'Acsl1', 'Acadvl', 'Etfdh', 'Tmem120a', 'Hadha', 'Esrra', 'Rreb1', 'Slc45a3', 'Nr2c1', 'Abat'…	460	3
Ehf	['Appl2', 'Fibp', 'Lypla2', 'Eif3i', 'Tmem41b', 'Arpc5l', 'Rps27l', 'Slc25a17', 'Polr2j', 'Arpc1a', 'Vps53', 'Erp44', 'Tsg101', 'Suds3', 'Crb3', 'Sptlc2', 'Dcun1d3', 'Elmo3', 'Rab11a', 'Fam188a', 'Eif4e2', 'Rpl32', 'Rps25', 'Vps33b', '1110004E09Rik', 'Wdr1', 'Pyroxd1', 'Mark2', 'Lrrfip2', 'Arfip2', 'Cep164', 'Akirin2', 'Sec24c', 'Pick1', 'Mpzl3', 'Rac1', 'Chchd5', 'Rnf10', 'Bag4', 'Lsr', 'Fbxo28'…	435	3
Foxc1	['Nfatc1', 'Zbtb2', 'Srf', 'Fosb', 'Ppp2r2b', 'Zswim6', 'Foxo1', 'Pdk4', 'Plec', 'Prdm16', 'Pitpnc1', 'Med13l', 'Mdm2', 'Inppl1', 'Slc12a2', 'Prrc2a', 'Smoc1', 'Fry', 'Rapgef3', 'Nfat5', 'Crim1', 'Bahcc1', 'Gadd45a', 'Brd2', 'Sirt1', 'Mpped2', 'Pde4b', 'Max', 'Dst', 'Cdkn1c', 'Irx3', 'Midn', 'Hexim1', 'Rnf38', 'Zbtb10', 'Klf10', 'Ell', 'Tshz2', 'Trim47', 'Mras', 'Socs5', 'Sox6', 'Ncam1', 'Rab39b'…	414	3
Srebf1	['Dolpp1', 'Hsp90b1', 'Mtmr4', 'P4hb', 'Hspa5', 'Rnf181', 'Osbp', 'Mvk', 'Mmab', 'Paip2b', 'Arrdc4', 'Shc1', 'Far1', 'Rrbp1', 'Arntl', 'Tysnd1', 'Fdft1', 'Spsb3', 'Hook1', 'Slc25a42', 'Plcxd2', 'Dcaf11', 'Os9', 'Fdps', 'Hsd17b12', 'F11r', 'Aldh6a1', 'Iqcd', 'Reep6', 'Rabl3', 'Gtf2e1', 'Manf', '5430416N02Rik', 'Lin52', 'Epm2aip1', 'Calr', 'Wbp1', 'Syvn1', 'Kdm4a', 'Nup88', 'Sdf2l1', '0610007P14Rik…	413	3
Grhl1	['Ikzf2', 'Ralbp1', 'Faf1', 'Rab25', 'Eps8l2', 'Ehf', 'Jup', 'Aff4', 'Epha1', 'Stap2', 'Tmem79', 'Cldn4', 'Klc3', 'Tnks1bp1', 'Elovl1', 'Sytl2', 'Fam83h', 'Cdkn2b', 'Tacstd2', 'Endou', 'Appl2', 'Pkp3', 'Ahcyl2', 'Klf5', 'Gdpd3', 'Qars', 'Cds1', 'Hk2', 'Hk1', 'Bag2', 'Shroom3', 'Baz2a', 'Zbtb7a', 'Trappc6a', 'Asprv1', 'Clasp1', 'Hmgn1', 'Otub2', 'Kif5c', 'Ywhaz', 'Fzd6', 'A130010J15Rik', 'Tyro3', …	371	3
Creb3l1	['Kdelr3', 'Rcn1', 'Rcn3', 'Fkbp14', 'Mmp23', 'Cpxm1', 'Dpep1', 'Lhfp', 'Creb3l1', 'Plxdc2', 'Col5a2', 'Col16a1', 'Chpf', 'Mrc2', 'Sorcs2', 'Serpinh1', 'Sparc', 'Ssr1', 'Prrx1', 'Sec16b', 'Sec23a', 'Col1a2', 'Rftn2', 'Fkbp11', 'Prrc1', 'Sh3gl1', 'Stx5a', '1810055G02Rik', 'P4ha1', 'Trp53inp2', 'Cdh11', 'Gorasp2', 'Kdelr2', 'Col1a1', 'Ptov1', 'Adamtsl1', 'Col11a1', 'Ssr3', 'Nkain4', 'Ppp1r10', 'Bdn…	361	3
Nfatc2	['Cadm1', 'Prrx1', 'Tiam2', 'Tgfb3', 'Nfatc1', 'Twist1', 'Il11', 'Chst11', 'Lin7a', 'Dixdc1', 'Cytl1', 'Scara3', 'Clec11a', 'Ccdc88a', 'Golph3', 'Rspo3', 'Ncam1', 'Cdkn1c', 'Nrk', 'Enkur', 'Trim46', 'Col8a2', '4930539J05Rik', 'Cpe', 'C1qtnf3', 'Sdk2', 'Samd4', 'Ube2f', 'Runx1', 'Tspan6', 'Fgfr3', 'Cnnm4', 'Phtf2', 'Tmem60', 'Mllt6', 'Rcan1', 'Rftn2', 'Ccdc80', 'Bcl6', 'Zfp36l1', 'Gse1', 'Colec12'…	214	3
Tef	['Abhd11', 'Per2', 'Fam131a', 'Tead1', 'Atp6v0c', 'Ak4', 'BC048403', 'Aktip', 'Dctn4', 'D5Ertd579e', 'Tle3', 'Ube2h', 'Tmem175', 'Nr1d2', 'Csnk1g2', 'Dpm1', 'Trps1', 'Jmy', 'Efr3a', 'Bcl6', 'Sox13', 'Ptprs', 'Galnt11', 'Lyrm1', 'Adarb1', 'Creld1', 'Huwe1', 'Nbr1', 'Pard6a', 'Tnrc18', 'Myl6', 'Per3', 'Por', 'Per1', 'Myh10', 'Trak1', 'Ndufb6', 'Papd7', 'Eif4a2', 'Rab9', 'Zbtb33', 'Zfp523', 'Fgfbp3'…	166	3
Bhlhe41	['Aff4', 'Cd164', 'Hspbap1', 'Cry1', 'Stx6', 'Dctn4', 'Bhlhe41', 'Adam10', 'Pld3', 'Crb3', 'Prkar2b', 'Lrfn4', 'Rreb1', 'Trp53inp1', 'Socs5', 'Runx1', 'Fxyd2', 'Ndufa7', 'Galnt3', 'Qtrt1', 'Tjp3', 'Stc2', 'Wsb2', 'Slc5a6', 'Tmem181a', 'Atp13a3', 'Muc1', 'Phc2', 'Ap1m2', 'Arhgef16', 'Dlg1', 'Tmem125', 'Trim39', 'Ctns', 'Shpk', 'Ralgds', 'Mrc1', 'Gas5', 'Cldn7', 'Actr3b', 'Pfkfb3', 'Ceacam1', 'Trim…	138	3
Msx1	['Fermt2', 'Polr2a', 'Klf2', 'Ubash3b', 'Nfatc1', 'Itga6', 'Ccnyl1', 'Socs2', 'Klf7', 'Nfkbiz', 'Phlpp1', 'Epas1', 'Cdkn1c', 'Penk', 'Bambi', 'Irf1', 'Sin3a', 'Rnf19b', 'Sntb2', 'Lims2', 'Plxna2', 'Rhob', 'Ier5l', 'Sgk1', 'Igfbp3', 'Suz12', 'Eln', 'Calm1', 'Nova1', 'Msx1', 'Nr4a1', 'Nrp1', 'Map4k4', 'Ntf3', 'Gadd45b', 'Gja4', 'Nog', 'Azin1', 'Igfbp4', 'Cdkn2aip', 'Ccnd2', 'Mylip', 'Ace', 'Nrp2', …	130	3
Ppard	['Plekhg3', 'Uchl1', 'Tnks2', 'Sesn2', 'Nt5c2', 'Ahcyl2', 'Cpeb4', 'Plekhh1', 'Sema4g', 'Tnfrsf21', 'Xpr1', 'Lrrc1', 'Sgsm3', 'Ube4a', 'Fam20b', 'Gatad2a', 'Tmem64', 'Ppfibp2', 'Pgap3', 'Rap2b', 'Src', 'Rxra', 'Slc30a1', 'Rnf144b', 'Cmtm4', 'Tmem37', 'Mtmr4', 'Hdgf', 'Rbm47', 'Aim1l', 'Hivep1', 'Myo5c', 'Sh3bgrl2', 'Rhbdf2', 'Alas1', 'Ndrg1', 'Tc2n', 'Nfe2l2', 'Abcc4', 'Atp1a1', 'Adipor2', 'Ctnnb…	129	3
Nfic	['Nfia', 'Glis2', 'Plod2', 'Laptm4a', 'Slc29a1', 'Rrbp1', 'Tns3', 'St3gal4', 'Iqsec1', 'Timp3', 'Vkorc1', 'Camk2n1', 'Tspo', 'Meis1', 'Ssr3', 'Itgb1', 'Bahcc1', 'Siae', 'Slc12a4', 'Bcl9l', 'Eif4g3', 'Plekha6', 'Chpf2', 'Cacnb1', 'Psd3', 'Lasp1', 'Thra', 'Bloc1s1', 'Pitpnb', 'Uggt2', 'Lamb1', 'Nfil3', 'Hbp1', 'Bicd1', 'Meis2', 'Ankrd39', 'Dnmt3a', 'Khdrbs3', 'Pacsin2', 'Tcta', 'Pnkd', 'Trio', 'Pik…	122	3
Nfia	['Nfia', 'Igfbp4', 'Slc39a1', 'Slc29a1', 'Errfi1', 'Klf9', 'Aplp2', 'Notch2', 'Cald1', 'Zbtb20', 'Atxn1', 'Sec63', 'Epha7', 'Rbfox2', 'Ltbp1', 'Hipk3', 'Lrig1', 'Prnp', 'Glce', 'Dnajb4', 'Daam1', 'Slc16a2', 'Tead1', 'Rnf19a', 'Ankrd46', 'Dnajc3', 'Smad5', 'Camk2n1', 'Cachd1', 'Deptor', 'Gabarapl1', 'Plekhf1', 'Ssr3', 'Zfp518b', 'Maged1', 'St5', 'Spry2', 'Gas1', 'Aspn', 'Colec12', 'Sik3', 'Pafah1b…	116	3
Srf	['Srf', 'Pkdcc', 'Vcl', 'Tpm1', 'Tnnt2', 'Krt19', 'Klf6', 'Fhl2', 'Myl7', 'Cdc14a', 'Epas1', 'Id4', 'Ptgds', 'Prrc2a', 'Edn1', 'Sh3bgr', 'Bbx', 'AI837181', 'Drap1', 'Lemd2', 'Cd24a', 'Espn', 'Npy', 'Sox2', 'Atp6v1c2', 'Prlr', 'Atp1b1', 'Pde1c', 'Dusp5', 'Egr2', 'Foxp2', 'Kcnk3', 'Arhgap1', 'Dmd', 'Ckm', 'Wisp1', 'Mmp15', 'S100g', 'Adcy6', 'Sspn', 'Ptpn21', 'Acpp', 'Carns1', 'Mapkapk2', 'Cited1', …	116	3
Sox11	['Trim8', 'Tmeff1', 'Foxp1', 'Ppp1r16b', 'Dpysl5', 'Kit', 'Hoxc10', 'Meis1', 'Aph1a', 'Hpgd', 'Phlpp1', 'Pcdh1', 'Ace', 'Dnaic1', 'Pitpnc1', 'Hopx', 'Itga3', 'Frmd4a', 'Smad6', 'Pde1c', 'Carhsp1', 'Trib2', 'Bmpr2', 'Smarca2', 'Upp1', 'Tmcc2', 'Casc4', 'Tek', 'St5', 'Tex14', 'Klhl5', 'Hyal2', 'Impdh1', 'Sox11', 'Apln', 'Nhlrc2', 'Prickle1', 'Tbx3', 'Slco2a1', 'Arl4d', 'Nkd1', 'Afap1l1', 'Ifit3', '…	88	3
Sox10	['Marcksl1', 'Cdc42ep1', 'Ephb3', 'Notch3', 'Pgpep1', 'Plp1', 'Rtkn', 'Dnajb2', 'Myo1b', 'Cdc42ep3', 'Zmiz1', 'Phc2', 'Flna', 'Ralgds', '2610203C20Rik', 'Pcbp4', 'Sox2', 'Serinc2', 'Sema4c', 'Etv6', 'Plekha1', 'Spin1', 'Fgfr1', 'Ngfr', 'Shf', 'Lama5', 'Prss23', 'Rbp1', 'Axin1', 'Cdc42ep4', 'Pfkfb3', 'Hyal2', 'Ttyh1', 'Sdc1', 'Vdr', 'Ptbp2', 'Tle3', 'Ctxn1', 'Hnrnpab', 'Bdnf', 'Amotl1', 'Runx1', '…	85	3
Gli1	['Svep1', 'Dtx3', 'Arsb', 'Ncald', 'Add3', 'Inha', 'Cacnb1', 'Ssbp2', 'Slc25a14', 'Gli2', 'Kcnj8', 'Hand2', 'Meis1', 'Runx1t1', 'Col13a1', 'Kcnk2', 'Cryzl1', 'Six5', 'Cadm3', 'Thbs3', 'Kdelr1', 'Pcgf1', 'Dcn', 'Smarca1', 'Fndc1', 'Klhl13', 'Nlgn2', 'Camk2a', 'Slc38a5', 'Snx18', 'Olfml1', 'Hoxa10', 'Tmem181a', 'Ust', 'Mmp19', 'Hspb2', 'C2', 'Sfrp1', 'Nfatc4', 'Meg3', 'Fam20a', 'Fam173b', 'Zfp423',…	80	3
Creb3	['Stx5a', 'Asb3', 'Tmem55b', 'Scfd1', 'Acap2', 'Slc38a5', 'Hps5', 'Gns', 'Phc3', 'Lamp1', 'Srprb', 'Tmem214', 'Zfyve26', 'Arfip1', 'Mapk3', 'Tmem86a', 'Ncald', 'Naglu', 'Tbx3', 'Rragc', 'Lrrc58', 'Slc31a2', 'Slc38a9', 'Cope', 'Spryd3', 'Fam195b', 'Ctns', 'Cyb5d2', 'Copb1', 'Usp48', 'Zmynd8', 'Sept4', 'Yipf3', 'Morf4l1', 'Sdf2', 'Dnajb11', 'Sec23ip', 'Abcd1', 'Arfgap1', 'Ncstn', 'Zc3h3', 'Nagk', '…	70	3
Hoxc10	['Pkdcc', 'Dlat', 'Cd164l2', 'Hoxc6', 'Hoxb8', 'Pth1r', 'Cox4i1', 'Ace', 'Pou3f3', 'Hoxc10', 'Cxxc5', 'Vdr', 'Phyhipl', 'Amot', 'Mapk8ip1', 'Atp1b1', 'Slc16a1', 'Cdkl2', 'Ywhaz', 'Nuak2', 'Ndrg3', 'Acot11', 'Myo5b', 'Aff1', 'Prom1', 'Chchd4', 'Fhit', 'AI314180', 'Fst', 'Plekhg3', 'Tshz1', 'Hoxc9', 'Mapk1ip1l', 'Gas2', 'Gas1', 'Arhgef16', 'Glis2', 'Wdfy3', 'Hoxb7', 'Lsamp', 'Erbb2', 'Sestd1', 'Dap…	68	3
Pparg	['Lipe', 'Pnpla2', 'Etv3', 'Stk10', 'Adamts4', 'Tcf7l2', 'Slc15a3', 'Mal', 'Mgll', 'Rnf144b', 'Sema6d', 'Galnt6', 'Capn5', 'Gmfb', 'Tinagl1', 'Eepd1', 'Sulf2', 'Vwa1', 'D17Wsu92e', 'Slc23a2', 'Adipor2', 'Mast4', 'Rhbdf2', 'Zbtb46', 'Slc6a9', 'Pcdh1', 'Cd36', 'Nrarp', 'Gpr4', 'Myh9', 'Lmo1', 'Acaa1b', 'Prkab1', 'Ybx1', 'Hmga1', 'Ttc7b', 'Trim25', 'Spry4', 'Csf1r', 'Cyth3', 'Fhdc1', 'Ly6i', 'Sdc3',…	68	3
Foxa2	['Fabp1', 'Foxa2', 'Dhcr24', 'Mgst1', 'Slc38a4', 'Apoa1', 'Car3', 'Pigr', 'Agt', 'Rarres1', 'Cdh2', 'Hsd17b2', 'Haao', 'Sec14l2', 'Ppp1r3b', 'Gpt2', 'Gls2', 'Aldh1a7', 'Slc39a8', 'Rbp4', 'Bdh1', 'Acaa1b', 'Slc6a13', 'Zfyve1', 'Insig2', 'Fgd6', 'Egfr', 'Slc25a15', 'Stard10', 'Sec24a', 'Sar1b', 'Crot', 'Nnmt', 'Lgals8', 'Pctp', 'Atp11c', 'Psen2', 'F5', 'Gbe1', 'Slc38a3', 'Zadh2', 'Rab9', 'Cyp7b1', …	62	3
Hoxa9	['Hoxa7', 'Hoxa9', 'Hoxb8', 'Hoxc9', 'Ncam1', 'Hoxb6', 'Hoxc10', 'Ep300', 'Ctxn1', 'Add3', 'Hoxb7', 'Hspa4', 'Hes1', 'Hoxa10', 'Sh3rf1', 'Alpl', 'Rpap1', 'Plekhg3', 'Spen', 'Scaf11', 'Vangl1', 'Dis3l', 'Phyhipl', 'Akr1b10', 'Ero1l', 'Srcin1', 'Fgd4', 'Ppard', 'Mlec', 'Arhgef10l', 'Enah', 'Pcbp3', 'Hist3h2ba', 'Far1', 'Rasd1', 'Gprc5c', 'Crocc', 'Ubxn2a', 'Plekha7', 'Ybx1', 'Ank3', 'Ermp1', 'Itga6…	59	3
Tead3	['Wtip', 'Ddr1', 'Tmem125', 'Cyr61', 'Smo', 'Fzd7', 'Rhbdf1', 'Smarcd3', 'Ppfibp1', 'Erbb2', 'Trip6', 'Map1lc3a', 'Dlg3', 'Plxnb1', 'Meis2', 'Usp2', 'Cacna1a', 'Csdc2', 'Steap4', 'Angptl4', 'Tead3', 'Otud1', 'Bmpr1a', 'Nr1d1', 'Cblc', 'Maml1', 'Nr2f2', 'Palld', 'P4ha3', 'Ntm', 'Dnajb4', 'Tln1', 'Plekhh3', 'Lrrc41', 'Tyro3', 'Epn2', 'Arhgap32', 'Pfkfb2', 'Metap1d', 'Ptpn3', 'Ptms', 'Dip2c', 'Ptx3'…	57	3
Hoxb7	['Scnn1a', 'Hoxb7', 'Hoxb8', 'Hoxb6', 'Hoxa7', 'S100g', 'Fxyd2', 'Fbxl19', 'Kifc3', 'Ybx2', 'Reps2', 'Senp3', 'Dach1', 'Laptm4b', 'Ppp1r1a', 'Hoxa9', 'Itpr1', 'Ubxn2a', 'Enpp5', 'Phldb2', 'Mfsd11', 'Pbx2', 'Cdk5', 'Acvr1b', 'Dhrs3', 'Stard8', 'Klc2', 'Slc2a9', 'Bahd1', 'Irx3', 'Wnk1', 'Pik3c2a', 'Pou3f3', 'Hoxc6', 'Hipk2', 'Tctn3', 'Ehd3', 'Ralgapb', 'Prom1', 'Slc6a6']	40	3
Foxp2	['Foxp2', 'Brd3', 'Paip2b', 'Fbxo32', 'Cldn8', 'Srf', 'H2afv', 'Atp6v1c2', 'Selenbp1', 'Epas1', 'Tbx18', 'Zfp428', 'Ovol2', 'Fam83e', 'Ccng2', 'Fat1', 'Gprc5a', 'Krt19', 'Etv4', 'Wnt6', 'Aldh1a1', 'Klf5', 'Sox2', 'Espn', 'Fam161a', 'Anxa8', 'Cd109', 'Osr2', 'Lman2l', 'Sh3d19', 'Il17re', 'Sftpd', 'Creb3l4', '5330417C22Rik', 'Hspb8', 'Oit1', 'Kif21a', 'Acpp']	38	3
Dbp	['Per3', 'Tef', 'Kcnk2', 'Maml3', 'Svep1', 'Ldb1', 'Per2', 'Osr1', 'Hoxa4', 'Slit2', 'Tiprl', 'Egflam', 'Fblim1', 'Six5', 'Pcgf2', 'Nr1d2', 'Nr1d1', 'Tslp', 'Tns3', 'Dbp', 'Vamp2', 'Wnt2', 'Nexn', 'Slc25a14', '1700001L19Rik', 'Atg10', 'Spon1', 'N6amt1', 'Ddx3y', 'Tmem175', 'Pknox2', 'Myh10', 'Bmp4', 'Rnf10', 'Cirbp', 'Pde5a']	36	3
Egr2	['Per1', 'Rrad', 'Ippk', 'Thbs1', 'Sirt1', 'Maff', 'Klf16', 'Tnc', 'Pdpn', 'Mapre1', 'Id4', 'Gprc5a', 'Hmga2', 'Zfand5', 'Depdc5', '3632451O06Rik', 'Pcf11', 'Brd2', 'Med26', 'Pak4', 'Cx3cl1', 'Rabgef1', 'Mapk6', 'Rbbp7', 'Npy', 'Tnfaip3', 'Jdp2', 'Lrig1', 'Egr1', 'Zc3h12a', 'Srf', 'Trib1']	32	3
Hoxa7	['Hoxa5', 'Hoxb2', 'Hoxb7', 'Vldlr', 'Slco3a1', 'Hoxb5', 'Fam193b', 'Hoxb4', 'Zfp503', 'Ckb', 'Rgl1', 'Ift57', 'Hoxb6', 'Scoc', 'Sgms1', 'Hoxa7', 'Unk', '4930402H24Rik', 'Zfp341', 'Ogt', 'Rnf6', 'Nudt2', 'Ppip5k1', 'Slc43a2', 'Lin52', 'Zhx3', 'Npnt']	27	3
Hoxc6	['Col5a3', 'Ppp1r1a', 'Irx1', 'Ifi205', 'Hoxc10', 'Baiap2l2', 'Rab6b', 'Hoxc6', 'Arhgap24', 'Hoxb8', 'Tbx15', 'Hoxa9', 'Rsrc1', 'Cd164l2', 'Efhd1', 'Mecom', 'Tanc1', 'Hoxa10', 'Pkdcc', 'Phyhipl', 'Hoxb7', 'Hoxc9', 'Angel1', 'Adcy6', 'Pou3f3']	25	3
Pitx2	['Gtf2ird1', 'Pitx2', 'Cish', 'Wnt7b', 'Pitx1', 'Limk2', 'Plek2', 'Fam83d', 'Isl1', 'Rnf10', 'Megf9', 'Tpm2', 'Glo1', 'Mgst3', 'Bdnf', 'Creb3l1', 'Esrp1', 'Igsf9', 'Eml2', 'Krt10']	20	3
Hnf1b	['Fxyd2', 'Hnf1b', 'Myo6', 'Rab3ip', 'Atp1b1', 'Idh2', 'Prr15l', 'Fabp3', 'Pth1r', 'Pcbd1', 'Car5b', 'Abcd3', 'Entpd5', 'Ggt1', 'Ank3', 'Rbm47', 'Ldhb', 'Rnf128', 'Igsf5']	19	3
Hoxb2	['Hoxb2', 'Timp3', 'Tnrc18', 'Col13a1', 'Nt5dc2', 'Arhgef17', 'Hoxa7', 'Hspb2', 'Hoxa5', 'Phc2', 'Inppl1', 'Dnmt3a', 'Morc2a', 'Rere', 'Cryab', 'Spred2', 'Ctbs']	17	3
Hoxa5	['Hoxa5', 'Tbx2', 'Amotl2', 'Timp3', 'Mapre2', 'Limch1', 'Adamts10', 'Gnaq', 'Tsc22d1', 'Vgll3', 'Lrp4', 'Hexim1', 'Egflam', 'Sept4', 'Fbxl3']	15	3
Rarg	['Rarg', 'Rbms1', 'Plcd1', '2010111I01Rik', 'Anxa2', 'Bambi', 'Klf4', 'Ahnak', 'Etv4', 'Rtn4', 'Tpm4', 'Tmem165', 'Tagln2']	13	3
Nfat5	['Zswim6', 'Vezf1', 'Tead1', 'Myo1c', 'Dock1', 'Zfp36l1', 'Ptpn14', 'Timp3', 'Gnas', 'Lima1', 'Gnaq', 'Tsc22d2']	12	3
Tcf7l2	['Sulf2', 'Tcf7l2', 'Svil', 'Il18', 'Arrdc3', 'Tbxas1', 'Ctnnd1', 'Il13ra1', 'Dirc2', 'Dync1h1', 'Mtus1']	11	3
Nr2f2	['Lrp4', 'Sort1', 'Tmem176b', 'Heyl', 'Angpt1', 'Gpx4', 'Lpp', 'Cmklr1', 'Slc41a3']	9	3
Hlf	['Ak4', 'Maf', 'Ces1d', 'Ddc', 'Slc4a4', 'Gatm', 'Tmem106a', 'Hlf']	8	3
Hoxb5	['Tbx2', 'Hoxa5', 'Limch1', 'Hoxb2', 'Hoxb6', 'Lbh', 'Shroom3']	7	3
Ddit3	['Ddit3', 'Syt11', 'Sertad2', 'Per1', 'Gli2']	5	3
Gata6	['Rbms2', 'Acvr1', 'Aldh1a2', 'Gata6', 'Zfhx3']	5	3
Gli2	['Gli2', 'Dzip1', 'Rab34', 'Lefty1']	4	3
Ets1	['Nr1h2', 'Rnf167', 'Eif3g', 'Isy1', 'Arpc2', 'Kti12', 'Ippk', 'Bcl2l1', 'Stk4', 'Arpc5l', 'Tomm70a', 'Dmap1', 'Sptlc2', 'Nipbl', 'Erh', 'Dpp8', 'Mfap1b', 'Lsm1', 'Gnai3', 'Fbxo28', 'Sco1', 'Daxx', 'Csnk1g1', 'Zbtb11', 'Serp1', 'Ubr1', 'Gemin8', 'Fam96b', 'Il2rg', 'Fbxl12', 'Mfap1a', 'Rapgef6', 'Xab2', 'Eif2b2', 'Gabarapl2', 'Nsun6', 'Usp11', 'Efcab7', 'Dzip3', 'Ss18', 'Fam96a', 'Pik3c3', 'Abcd1'…	2036	4
Fli1	['Nr1h2', 'Arpc2', 'Kti12', 'Atg16l1', 'Epn1', 'Ippk', 'Bcl2l1', 'Hspbp1', 'Zfp410', 'Ywhab', 'Stk4', 'Ap1m1', 'Arpc5l', 'Tomm70a', 'Zcchc6', 'Sfswap', 'Cap1', 'Sptlc2', 'Tbc1d22a', 'Rab11a', 'Nipbl', 'Bin3', 'Dpp8', 'Mfap1b', 'Cstf2', 'Pik3r4', 'Gnai3', 'Psmd6', 'Sco1', 'Daxx', 'Dhx38', 'Sass6', 'Eif3l', 'Srbd1', 'Gemin8', 'Il2rg', 'Wdr76', 'Rnf185', 'Rapgef6', 'Xab2', 'Nsun6', 'Usp11', 'Zfp105'…	1994	4
Irf8	['Fcgr2b', 'Tmem206', 'Alox5ap', 'Tagap', 'Elmo1', 'Lpxn', 'Svep1', 'Lsp1', 'Plek', 'Ppp1r16b', 'Cd68', 'Lmo2', 'Arhgap22', 'Samsn1', 'Fcrla', 'Sp100', 'Zfp710', 'Ccl4', 'Lrmp', 'Ncf2', 'Cd74', 'Cfp', 'Pold4', 'Arhgef3', 'Irf2', 'Siglecg', 'Slc15a3', 'Bcl2a1b', 'Bcl2a1a', 'H2-K2', 'Plxnc1', 'Gpr183', 'Arhgap30', 'Dok3', 'Laptm5', 'Bcl2a1d', 'Spn', 'Pla2g15', 'Parp8', 'Tprgl', '5430427O19Rik', 'Ar…	1648	4
E2f4	['Prr11', 'Agfg2', 'Gsk3b', 'Kcnab2', 'Narf', 'Ankrd54', 'Golph3l', 'Hist1h3c', 'Chek2', 'Iffo1', 'Cdc6', 'E2f8', 'Cdc23', 'Snrpa', 'Son', 'Ints7', 'Dtl', 'Rpa2', 'Cdca2', 'Fam46c', 'Tomm40', 'Fam117a', 'Aurka', 'Pnrc2', 'Cstf1', 'Sp2', 'Smad2', 'Rhof', 'Top2a', '2810006K23Rik', 'Dnajb11', 'Tbccd1', 'Hist1h3a', 'Iqcd', 'Ube2c', 'Cnnm2', 'Lin52', 'Arhgap33', 'Recql', '0610007P14Rik', 'Cdk1', 'Terf…	1641	4
Elf1	['Rnf167', 'Rps18', 'Dhx36', 'Eif3g', 'Cdk13', 'Isy1', 'Arpc2', 'Mdm4', 'Kti12', 'Senp7', 'Atg16l1', 'Ippk', 'Stk4', 'Zcchc6', 'Sptlc2', 'Rps6', 'Nipbl', 'Erh', 'Cstf2', 'Pik3r4', 'Daxx', 'Csnk1g1', 'Hnrnpd', 'Zbtb11', 'Fibp', 'Ubr1', 'Fam96b', 'Il2rg', 'Fbxl12', 'Mcm3ap', 'Brf2', 'Rapgef6', 'Xab2', 'Zbtb45', 'Eif2b2', 'Ube2n', 'Ppp4c', 'Mark2', 'Eif3i', 'Zc3h13', 'Ddx21', 'Parg', 'Srsf5', 'Tomm2…	1530	4
E2f2	['Mcm6', 'E2f2', 'E2f1', 'E2f8', 'Cdc6', 'Mcm3', 'Pola1', 'Mcm8', 'Cdc25a', 'Rbl1', 'Topbp1', 'Uhrf1', 'Prkdc', 'Dtl', 'Mcm4', 'Cdk1', 'Hist1h2bm', 'Hells', 'Lig1', 'Srsf2', 'Mcm5', 'Srsf1', 'Rpa2', 'Mbnl3', 'Wee1', 'Atad2', 'Myb', 'Smc3', 'Ranbp1', 'H2afv', 'Nfatc2ip', 'Cep57', 'Casp8ap2', 'Ppp1cc', 'Chaf1a', 'Fam76b', 'Pin1', 'Rbbp4', 'Kntc1', 'Arhgap11a', 'Agfg2', 'Serbp1', 'Zfp367', 'Hnrnpa3'…	1301	4
Hcfc1	['Tnpo3', 'Arfip1', 'Mettl6', 'Gabpa', 'Trip4', 'Fibp', 'Ywhab', 'Tssc4', 'Dhx36', 'Vps52', 'Gga1', 'Zranb2', 'Usf1', 'Cbll1', 'Zcchc6', 'Ccz1', 'Slc25a46', 'Ptrh2', 'Nipbl', 'Nmnat1', 'Dpp8', 'Zfp668', 'Mtmr9', 'Parg', 'Ubox5', 'Sart3', 'Nudt5', 'Cdc123', 'Prkcsh', 'Hspa4', 'Klhl20', 'Mgat1', 'Phrf1', 'Mlec', 'Mastl', 'Senp7', 'Yme1l1', 'Psmd6', 'Zfc3h1', 'Vps13b', 'Topbp1', 'Snrnp200', 'Tor1b',…	1218	4
Irf7	['Rtp4', 'Isg15', 'Zfp710', 'Irf2', 'Oasl1', 'Ifit3', 'Usp18', 'Rsad2', 'Slc15a3', 'Map3k8', 'Elmo1', 'Ccl5', 'Zbp1', 'Zfp36l1', 'Ccl4', 'Fcgr4', 'Cybb', 'Bst2', 'Ifitm2', 'Meis2', 'Parp14', 'Adamts4', 'B2m', 'Nedd9', 'Alox5ap', 'Cxcl10', 'Dram1', 'Il4i1', 'Dclre1c', 'Clec7a', 'Sgms1', 'Cnksr3', 'Ccnt2', 'Oas2', 'Uba7', 'Cd274', 'Fli1', 'Msr1', 'Zfhx2', 'Gna13', 'Tcirg1', 'Sp100', 'Il15ra', 'Lmo2…	1162	4
Elf4	['Cog3', 'Atg16l1', 'Vps52', 'Ppp4c', 'Fli1', 'Bin3', 'Lypla2', 'Fbxo28', 'Pik3cg', 'Arpc2', 'Tsc22d4', 'Klhl6', 'Arfip1', 'Cbll1', 'Tbkbp1', 'Tmbim6', 'Gabpa', 'Trip4', 'Lcp2', 'Slc25a46', 'Kctd2', 'Ywhab', 'Cap1', 'Zfp384', 'Cln3', 'Pex11a', 'Topbp1', '4930453N24Rik', 'Elac2', 'Zbtb12', 'Spn', 'Utp3', 'Fcgr4', 'Pou2f2', 'Tfam', 'Ino80b', 'Ipo8', 'Arhgap25', 'Sco1', 'Gdap2', 'Wdr3', 'Mtmr4', 'Cn…	1152	4
Ikzf1	['Tagap', 'Elmo1', 'Usp38', 'Lpxn', 'Lsp1', 'Plek', 'Ppp1r16b', 'Cxcr3', 'Lmo2', 'Arhgap22', 'Fbxo28', 'Rnf5', 'Fcrla', 'Fbxl12', 'Sp100', 'Ccl4', 'Lrmp', 'Ncf2', 'Cd74', 'Lcp2', 'Pold4', 'Arhgef3', 'H2-K2', 'Plxnc1', 'Gpr183', 'Arhgap30', 'Dok3', 'Laptm5', 'Aff3', 'Spn', 'Parp8', '5430427O19Rik', 'Ptpn6', 'Pkn1', 'H2-K1', 'Coro1b', 'Stk4', 'Ino80e', 'Arhgap11a', 'Pik3cg', 'Stap1', 'Nfkbid', 'Psm…	1043	4
Irf2	['Rtp4', 'Ifit3', '1700056E22Rik', 'Rbck1', 'Ggps1', 'Rab19', 'Irf2', 'Tcirg1', 'Bst2', 'Cd274', 'Zbp1', 'Uba7', 'Polr2a', 'Bcl2a1b', 'Plxnc1', 'B2m', 'Cd74', 'Flt3l', 'Dram1', 'Ccnt2', 'Atoh8', 'Xaf1', 'Erap1', 'Dnajc14', 'H2-K1', 'Rsf1', 'Gsdmd', 'H2-K2', 'Gripap1', 'Vgll4', 'Il12a', 'Grap', 'Fli1', 'Arhgap30', '5430427O19Rik', 'Nckap1l', 'Rasgrp3', 'H2-Q6', 'Fam26f', 'Elmo1', 'Il15', 'Ms4a1', …	1027	4
E2f1	['Mcm6', 'E2f1', 'E2f8', 'Cdc6', 'Mcm3', 'Pola1', 'Trmt6', 'Mcm8', 'Cdc25a', 'Rbl1', 'Topbp1', 'Uhrf1', 'Dtl', 'Mcm4', 'Cdk1', 'Hist1h2bm', 'Hells', 'Lig1', 'Srsf2', 'Mcm5', 'Cox8a', 'Srsf1', 'Paqr4', 'Rpa2', 'Mbnl3', 'Wee1', 'Atad2', 'Myb', 'Smc3', 'Ranbp1', 'H2afv', 'Uhrf2', 'Casp8ap2', 'Ppp1cc', 'Chaf1a', 'Map3k7', 'Fam76b', 'Kntc1', 'Arhgap11a', 'Zfp367', 'Hnrnpa3', 'Ung', 'Slbp', 'Gins3', 'S…	1019	4
Stat1	['Rtp4', 'Ifit3', 'B2m', 'Usp18', 'Bst2', 'Zbp1', 'Irf2', 'Parp14', 'Cybb', 'Oasl1', 'Ggps1', 'Polr2a', 'Gripap1', 'Cd274', 'Tcirg1', 'Uba7', 'Ccnt2', 'Arhgap30', 'Fli1', 'Dhx29', 'Serp1', 'Ccl5', 'Gsdmd', 'Cd74', 'Rbck1', 'Xaf1', 'H2-K1', 'Tor3a', 'Evl', 'Rab19', 'Oas2', 'Fbxl12', 'H2-K2', 'Fyb', 'Erap1', 'Wars', 'Dclre1c', 'Fam26f', 'Zfp710', 'H2-M3', 'Stx17', 'Nsun6', 'Bbx', 'H2-D1', 'H2-Q6', …	1003	4
Irf9	['Rtp4', 'Isg15', 'Irf2', 'Oasl1', 'Ifit3', 'Usp18', 'Rsad2', 'Map3k8', 'Zbp1', 'Ggps1', 'Rasgrp3', 'Zfp36l1', 'Bst2', 'Ifitm2', 'Meis2', 'Vgll4', 'Ppp1r16b', 'Parp14', 'Itpkb', 'B2m', 'Cxcl10', 'Zwilch', 'Actb', 'Armcx6', 'Ccnt2', 'Oas2', 'Uba7', 'Sox6', 'Cd274', 'Baz2b', 'Dnpep', 'Fli1', 'Ctbp2', 'Gng11', 'Sdpr', '2810403A07Rik', 'Grap', 'Gripap1', 'Tcirg1', 'Sp100', 'Lmo2', 'Rac1', 'Frmd4a', '…	957	4
Irf5	['Trim8', 'Zfp710', 'Irf2', 'Oasl1', 'Usp18', 'Slc15a3', 'Zbp1', 'Stap1', '5430427O19Rik', 'Rasgrp3', 'Ccl4', 'Fcgr4', 'Cybb', 'Bst2', 'Parp14', 'Nedd9', 'Alox5ap', 'Actb', 'Dnajc14', 'Il4i1', 'Ptpn6', 'Dclre1c', 'Hivep1', 'Clec7a', 'Ccnt2', 'Oas2', 'Rab19', 'Arhgap25', 'Cxcr5', 'Cd274', 'Baz2b', 'Plxnc1', 'Fli1', 'Msr1', 'Arhgef6', 'Eif3k', 'Grap', 'Serp1', 'Dapp1', 'Gripap1', 'Tcirg1', 'March1'…	943	4
Spib	['Zfp668', 'Tnpo3', 'Pik3r4', 'Epn1', 'Arpc2', 'Mgat1', 'Gpsm3', 'Sept1', 'Trip4', 'Gas5', 'Slx1b', 'Bola2', 'C2cd3', 'Dok3', 'Lzic', 'Rgs14', 'Ptpn1', 'Cdk13', 'Rrnad1', 'Arpc5l', '1700084E18Rik', 'Arhgap27', 'Mtmr4', 'Ap1m1', 'Chtf8', 'Dgkz', 'Lpxn', 'Srsf5', 'Dapp1', 'Zkscan6', 'Ccr7', 'Irf2', 'Fem1a', 'Arf6', 'Uvrag', 'Nol6', 'Zranb3', 'Erp44', 'Trim35', 'Kdm3b', 'Rab11fip2', 'Arhgef3', 'Fcgr…	918	4
Relb	['Nfkb2', 'Nfkbia', 'Gpbp1', 'Icam1', 'Gngt2', 'Relb', 'Stat5a', 'Ltb', 'Cxcl1', 'Rel', 'Gt(ROSA)26Sor', 'Cxcl2', 'Tank', 'Irf2', 'Cfl2', 'Smoc1', 'Tnip1', 'Cd74', 'Dnaja1', 'Ccl5', 'Neurl3', 'Hivep2', 'Ankhd1', 'Irf1', 'Ifngr2', 'Casp4', 'Stx11', 'Ebf1', 'Actn1', 'Tpbg', 'Fas', 'Ptprj', 'Gabpb1', 'C2', 'H2-Q6', 'Map4k4', 'Psme2', 'Rps19', 'Rnf31', 'Myo1c', 'Wac', 'Zfp687', 'Nek8', 'H2-Aa', 'Man2…	783	4
Usf2	['Amdhd2', 'Fam134a', 'Tmem55b', 'Atg3', 'Dvl2', 'Neurl2', 'Slc35a5', 'Ube2q1', 'Mfsd1', 'Fam118b', 'Serf2', 'Dhx35', 'Mcoln1', 'Cuta', 'Atp6v1h', 'Vps33a', 'Snx2', 'Uvrag', 'Tbcel', 'Orai2', 'Slc38a7', 'Cry1', 'Bhlhe41', 'Bloc1s3', 'Gtf2h1', 'Scamp3', 'Mfsd7c', 'Pias4', 'Pld3', 'Zfp438', 'Rspry1', 'Ubxn1', 'Bmp2k', 'Foxm1', '1110059E24Rik', 'Lztfl1', 'Plcg2', 'Prkar2b', 'Gnb2', 'Dnajc16', 'Khk',…	767	4
Taf1	['Tlk1', 'Ddx6', 'Nipbl', 'Zc3h4', 'Arid1a', 'Cnot7', 'Vps37a', 'Zmiz1', 'Ddx17', 'Pum2', 'Ccar1', 'Zzef1', 'Pja2', 'Scaf11', 'Erlec1', 'Tab2', 'Rc3h2', 'Lin54', 'Ubtf', 'Pdzd8', 'Htatsf1', 'Cggbp1', 'Rprd1b', 'Nup153', 'Cdk13', 'Ehd3', 'Gtf2a1', 'Snap29', 'Ppig', 'Pds5a', 'Arid1b', 'Hnrnpul1', 'Uso1', 'Sfswap', 'Hnrnpa3', 'Cdk5rap2', 'Clock', 'Usp47', 'Hnrnpa2b1', 'Hcfc1', 'Usp34', 'Cdc25b', 'Gn…	695	4
Nfkb2	['Nfkbia', 'Nfkb2', 'Cxcr5', 'Adamts4', 'Gpbp1', 'Cxcl9', 'Rel', 'Gngt2', 'H2-Aa', 'Tank', 'Map3k8', 'Cd74', 'Osmr', 'Tnfaip3', 'H2-K2', 'Itga5', 'Neurl3', 'Tnip1', 'Cd40', 'Il6', 'Tgif1', 'Ncf2', 'H2-K1', 'Csf1', 'Casp4', 'Psme2', 'H2-D1', 'Isyna1', 'Stat5a', 'Stip1', '2410006H16Rik', 'Sfmbt1', 'P2ry10', 'Socs5', 'Palld', 'Bcl3', 'Slc39a14', 'Hivep2', 'Dclk1', 'Sri', 'Gripap1', 'Sirt1', 'Myo1c',…	639	4
Nfyb	['Prr11', 'Agfg2', 'Cdkn3', 'Ankrd54', 'Hist1h3c', 'Chek2', 'Ccng2', 'Cdc6', 'E2f8', 'Rnf181', 'Ints7', 'Dtl', 'Vcp', 'Rpa2', 'Cdca2', 'Gtf2e1', 'Hmgb2', 'Cyp39a1', 'Aurka', 'Pnrc2', 'Cstf1', 'Sp2', 'Top2a', '2810006K23Rik', 'Dnajb11', 'Tbccd1', 'Hist1h3a', 'Iqcd', 'Ttf2', 'Ube2c', 'Prpf40a', 'Arhgap33', 'H2afx', 'Recql', 'Cdk1', 'Terf1', 'Ppp6r3', 'Rbm14', 'Hist1h3g', 'Ppp2r5c', 'Hist2h2be', 'St…	631	4
Pml	['Tnpo3', 'Gabpa', 'Cdk13', 'Atg16l1', 'Arpc5l', 'Tssc4', 'Pik3r4', 'Syvn1', 'Usf1', 'Rnf167', 'Slx1b', 'Zfp513', 'Eif3g', 'Eif2b2', 'Usp38', 'Daxx', 'Ttpal', 'Zfp768', 'Ino80b', 'Ap1s2', 'Zfp653', 'Rgl2', 'Klhl20', 'Mgat1', 'Rnf185', 'Lrrc8a', 'Yme1l1', 'Trim35', '1810024B03Rik', 'Kctd10', 'Serp1', 'Hars', 'Pigt', 'Usp30', 'Edc4', 'Sfswap', 'Bmp2k', 'Nsun6', 'C2cd3', 'Smu1', 'Sh3bp5l', 'Acin1', …	557	4
Rel	['Nfkb2', 'Tnfaip3', 'Nfkbia', 'Map3k8', 'Relb', 'Rel', 'Gpbp1', 'Neurl3', 'Cxcl2', 'Gngt2', 'Ifngr2', 'Xpo1', 'Ccl4', 'Rps19', '5430427O19Rik', 'Hivep1', 'Myo1e', 'Dennd4a', 'Tank', 'Slc38a1', 'Abi1', 'Cd74', 'H2-Aa', 'H2-D1', 'Tagap', 'Jak2', 'Rilpl2', 'Il1r2', 'Camk1d', 'Rrad', 'Il1b', 'Notch2', 'Nfkbie', 'Ebi3', 'Ccl17', 'Rgs1', 'Ccl9', 'Cd40', 'Eif5b', 'Pou2f1', 'Fam69a', 'Ankrd33b', 'Stab1'…	553	4
Nfe2	['Amdhd2', 'Gla', 'Atg3', 'Ube2b', 'Slc35a5', 'Picalm', 'Serf2', 'Atp6v0b', 'Gabarap', 'Cln3', 'Kdm6a', 'Orai2', 'H2afz', 'March8', 'Atp6v0d1', 'Hps3', 'Osbpl8', 'Bloc1s3', 'Slc43a1', 'Adam10', 'Mfsd7c', 'Mafg', 'Arpc5', 'Prdx6', 'Anln', 'Rab3il1', 'Lamp1', '2810408I11Rik', 'Ip6k1', 'Bnip3l', 'Plcg2', 'Prkar2b', 'Gnb2', 'Ypel5', '6430548M08Rik', 'Zfp217', 'Rara', 'Dleu2', 'Dusp1', 'Xpnpep1', 'Daz…	531	4
Nr3c1	['Son', 'Atp5sl', 'Ip6k1', 'Baz1b', 'Pip4k2b', 'Btrc', 'Tnrc6b', 'Ube3a', 'Stag1', 'Phf8', 'Zzef1', 'Atf1', 'E430018J23Rik', 'Pias1', 'Zc3h4', 'Epn2', 'Gpbp1l1', 'Gopc', 'Tnks2', 'Trappc8', 'Dido1', 'Ddx17', 'Caml', 'Cuedc2', 'Cggbp1', 'Pds5b', 'Tab2', 'Osbpl11', 'Phactr4', 'Malat1', 'Wasf2', 'Mtmr10', 'Asxl1', 'Skap2', 'Zfp606', 'Pum2', 'Mtss1', 'Acvr2b', 'Necap1', 'Rock1', 'Zfp644', 'Slc25a19',…	503	4
Kdm5a	['Cdk13', 'Dhx36', 'Pyroxd1', 'Csnk1g1', 'Cbll1', 'Srsf5', 'Nipbl', 'Polr2h', 'Xrn2', 'Zcchc6', 'Snrnp200', 'Parg', 'Mdm4', 'Chd2', 'Acin1', '2700097O09Rik', 'Zc3h13', 'Vps13b', 'Pigt', 'C2cd3', 'Cdc37l1', 'Topbp1', 'Pik3c3', '2210408I21Rik', 'Rabgap1', 'Edc4', 'Cradd', 'Foxred1', 'Cstf3', 'Mea1', 'Senp7', 'Strn', 'Zfp597', 'Mon1b', 'Tnks', 'Atm', 'Npat', 'Usp38', '2410004B18Rik', 'Ahsa1', 'Rb1cc…	479	4
E2f7	['Mcm3', 'E2f8', 'Mcm6', 'Casp8ap2', 'Ranbp1', 'Mcm4', 'Zbtb12', 'H2afv', 'Lig1', 'Uhrf1', 'Ssrp1', 'Hells', 'E2f1', 'Zfp367', 'Mxd3', 'Topbp1', 'Pola1', 'Atad2', 'Sin3a', 'Gins2', 'Ncapg', 'Stag1', 'Suz12', 'Srsf2', 'Cdc6', 'Camta1', 'Kntc1', 'Mcm8', 'Hist1h4d', 'Tcf19', 'Rbl1', 'Cchcr1', 'Mdc1', 'Ybx1', 'Lta4h', 'Gabpb1', 'Hist1h1e', 'Baz1b', 'Plekho2', 'Donson', 'E2f3', 'Wee1', 'Mcm5', 'Gnai3'…	457	4
Runx3	['Fmnl1', 'Sh2d3c', 'Batf', 'Cytip', 'Cd160', 'Cd28', 'Cln3', 'Ctsw', 'Tspan32', 'Rgs1', 'Itpkb', 'Xcl1', 'Gpr171', 'Def6', 'Ptpn22', 'Tfam', 'Runx3', 'Iqgap2', 'Lpxn', 'Arid3b', 'Gpr132', 'Rnf43', 'AI504432', 'Sdf2l1', 'Bcar3', 'Kcnip3', 'Elmo2', 'Txk', 'Arhgap15', 'Mllt3', 'Ccl3', 'Akap13', 'Arl6ip5', 'Ly9', 'Was', 'Hsd11b1', 'Ccl4', 'Chn2', 'Mthfd1l', 'Lck', 'Rac2', 'Dgkz', 'Tmsb10', 'Dok2', '…	440	4
Etv3	['Lcp2', 'Tbkbp1', 'Pik3r5', 'Ly96', 'Bcl2a1b', 'Btf3', 'Bcl2a1a', 'Bcl2a1d', 'Wdr26', 'Tjp2', 'Cd68', 'Nfat5', 'Cd14', 'Gdf15', 'Samsn1', 'Ccr7', 'Arhgap27', 'Gpr65', 'Baz1a', 'Tmem206', 'Sh3bp2', 'Zfp710', 'Srgap1', 'Git1', 'Ythdc1', 'Foxp1', 'Arpc2', 'Zc3h10', 'Trerf1', 'Agpat4', 'Madd', 'Fbxo11', 'Laptm5', 'Dennd4b', 'Lima1', 'Slc9a9', 'Rara', 'Lpxn', 'Nfkbid', 'Mapk1ip1l', 'St3gal1', 'Ms4a7'…	378	4
Gabpa	['Vps52', 'Dhx36', 'Hspbp1', 'Sfswap', 'Map3k7', 'Ercc3', 'Slc39a9', 'Dpp8', 'C2cd3', 'Actr6', 'Dhx38', 'Csnk1g1', '8430429K09Rik', 'Dzip3', 'Hccs', 'Hspa4', 'Uba6', 'Mon1b', 'Mtx3', 'Ipo7', 'Uspl1', 'Nek9', 'Chuk', 'Gabpa', 'Eif2s3x', 'Nup155', 'Ubox5', 'Zranb2', 'Ogg1', 'Zbtb12', 'Mcm8', 'Ints1', 'Ppig', 'Zkscan5', 'Hnrnpa0', 'Shoc2', 'Abcb7', 'Zfp830', 'Hirip3', 'Tbrg4', 'Zranb3', 'Zfp568', 'U…	364	4
Trp53	['Banp', 'Fbxo46', '1110004F10Rik', 'Zfp444', 'Snapc3', 'Gtf2h4', 'Phf23', 'Actr1a', 'Nop14', 'Ddx23', 'Cwc22', 'Bub3', 'Ahsa1', 'Lmnb2', 'Pde6d', 'Arid4b', 'Wdr12', 'Rps27a', 'Clp1', 'Vcpip1', 'Hscb', 'Chek2', 'Sf3b2', 'Chchd3', 'Ddx49', 'Abi1', 'Arv1', 'Akirin2', 'Zfp277', 'Spcs2', 'Pa2g4', 'Srrm2', '9130401M01Rik', 'Ints9', '2210016L21Rik', 'Hirip3', 'Ino80e', 'Serbp1', 'Abcf2', 'Ube2n', 'Men1…	336	4
Cebpe	['Lcn2', 'Camp', 'Hmgn2', 'Dram1', 'Cdc42se1', 'Gys1', 'Lmo4', 'S100a8', 'Trib1', 'Aldh3b1', 'Rhob', 'Nr2f1', 'Asns', 'Olr1', 'Ncam1', 'Flot1', 'Rgs18', 'Mmp8', 'Mmp9', 'Hk3', 'Cybb', 'Slpi', 'Actn1', 'F630028O10Rik', 'Pilrb1', 'Clec12a', 'Mapk14', 'Mxd1', 'Trem3', 'Anp32b', 'Phactr2', 'Vav3', 'Nadk', 'B430306N03Rik', 'Igsf6', 'Cdca2', 'Prr11', 'Clec4e', 'Tesk2', 'Ffar2', 'Trem1', 'S100a9', 'Tmem…	332	4
Usf1	['Ubap2l', 'Tmem55b', 'Fam118b', 'Zfp62', 'Nagpa', 'Coro1b', 'Thrap3', 'Ostm1', 'Ccdc115', 'Nae1', 'Tor3a', '4933434E20Rik', 'Ube2q1', 'Kdm4c', 'Vps33a', 'Rpusd4', 'Synrg', '1110059E24Rik', 'Fam192a', 'Hps3', 'Commd8', 'Vps16', 'Taf6l', 'Akap10', 'Git2', 'Capza2', 'Taf8', 'Slc35a5', 'Neurl2', 'Ctsa', 'Zfp292', 'Nsmce2', 'Vps26a', 'Gigyf1', 'Pop7', 'Dvl2', 'Hnrnph2', 'Ptch1', 'Epc1', 'Dhx35', 'Ora…	331	4
Yy1	['Hcfc1', 'Cdk5rap2', 'Zfc3h1', 'Rbm25', 'Phf8', 'Luc7l3', 'Ptpn4', 'Pip4k2b', 'Map3k4', 'Npm1', 'Fiz1', 'Map2k5', 'Rps6ka3', 'Zzef1', 'Dido1', 'Srrm2', 'Naa15', 'Sart3', 'Baz1b', 'Stag1', 'Usp34', 'Brd4', 'Htatsf1', 'Rps29', 'Zfp644', 'Casc3', 'Cstf2t', 'Bptf', 'R3hdm1', 'Sugt1', 'Fbxl18', 'Rps27', 'Ndufs2', 'Zmym4', 'Ylpm1', 'Nucks1', 'Rock1', 'Mff', 'Hnrnpul1', 'Snrpa', 'Zbtb11', 'Rmi1', 'Zbtb…	326	4
Eomes	['Tmbim6', 'Nr1h2', 'Ppig', 'Wdr26', 'Arf3', 'Fbxo28', 'Ss18', 'Tm9sf3', 'Il2rg', 'Arfip1', '4930453N24Rik', 'Daxx', 'Eif4e2', 'Rad54l2', 'Gabarapl2', 'Arpc2', 'Mdh1', 'Lcp2', 'Rock1', 'Lsm1', 'Ppp4c', 'Sptlc2', 'B3gat3', 'Eif5a2', 'Fam173a', 'Rer1', 'Ywhab', 'Zfp27', 'Zkscan5', 'Cradd', 'Mrps18c', 'Sept1', 'Gga1', 'Stk4', 'Hcst', 'Bcap31', 'Dnajc14', 'Trappc8', 'Psenen', 'Xcl1', 'Mea1', 'Prkacb'…	303	4
Elk4	['Dhx36', 'Cdk13', 'Mdm4', 'Arfip1', 'Pyroxd1', 'Zcchc6', 'Nipbl', 'Dpp8', 'Mfap1b', 'Cstf2', 'Usp30', 'Zbtb11', 'Srbd1', 'Fbxl12', 'Mcm3ap', 'Pigm', 'Pik3c3', 'Ascc2', 'Zc3h13', 'Parg', 'Eif4ebp2', 'Hspa4', 'Topbp1', 'Uba6', 'Tfb1m', 'Smug1', 'Sf3b2', 'Ipo7', 'Nek9', 'Prpf3', 'Naa35', 'Ankhd1', 'Cdc37l1', 'Mtif2', 'Tnks', 'Nup155', 'Zbtb12', 'Mcm8', 'Gm12191', 'Fbxo32', 'Noc3l', 'Rpl34', 'Chd2',…	301	4
Batf	['Fosb', 'Vps37b', 'Rfx1', 'Dok1', 'Dok2', 'Heca', 'Nup153', 'Mxd1', 'Ccl4', 'Rps29', 'Map1lc3a', 'Btg1', 'Dusp10', 'Rapgef2', 'Flrt3', 'Taf4b', 'Got1', 'Chd2', 'Cdc42se1', 'Rpl9', 'Crem', 'Cdk2ap2', 'Pitx2', 'Arih2', 'Tnfaip3', 'Ubn1', 'Myl6', 'Rpl13a', 'Ak8', 'Rbp4', 'Lrrfip1', 'Nfkb2', 'Nr4a2', 'Runx1', 'Rplp2', 'Relb', 'Lmbr1l', 'Etv3', 'Cxcl16', 'Bcl2a1b', 'Fbxo33', 'Slamf9', 'Rab8b', 'Runx3…	300	4
Nr2c2	['Arfip1', 'Pyroxd1', 'Cog3', 'Dhx36', 'Slc25a46', 'Ppp1r16a', 'Slc39a9', 'Zfp105', 'Dpp8', 'Mlec', 'Yme1l1', 'Vps13b', 'Snrnp200', 'Smug1', 'Aak1', 'Golga1', 'Zer1', '2210408I21Rik', 'Tnks', 'Med6', 'Synrg', 'Cnot10', 'Nudt22', 'Prkacb', 'Psme4', 'Alkbh3', 'Rab11fip2', 'Aftph', 'Tram2', 'Hcfc1', 'Mon1b', 'Rb1cc1', 'Mcm3ap', 'Edem3', 'Anapc4', 'Krit1', 'Kctd2', 'Atp5h', 'Atm', 'Npat', 'Uspl1', 'D…	279	4
Nfya	['Prr11', 'Agfg2', 'Hnrnpul1', 'Cdc23', 'Rps6ka5', 'Ints7', 'Sp2', 'Arhgap33', 'Kpna4', 'Tle4', 'Stil', 'Tcerg1', 'Pms2', 'Kif18b', 'Dnd1', 'Agpat5', 'Srsf2', 'Brd8', 'Ncapd2', 'Txndc16', 'Zfp526', 'Ppil1', 'Zswim3', 'Usp1', 'Vash2', 'Recql5', 'Rbm15', 'Nfkb2', 'Fam72a', 'Ubp1', 'Rpain', 'Hsp90b1', 'Stx5a', 'Mapk7', 'Arntl', 'Txlna', 'Cit', 'Hist1h2bp', 'Gas2l3', 'Hist1h2bj', 'Rasa4', 'Cox6a2', '…	260	4
Setdb1	['Ncln', 'Prcc', 'Zcchc8', 'Dync1i2', 'Snx27', '4632427E13Rik', 'Nedd8', 'Vcpip1', 'Sel1l', 'Pcm1', 'Smug1', 'Ddx23', 'Cc2d1a', 'Rnaseh2a', 'Cbll1', 'Rab1b', 'Trpc4ap', 'Snx16', 'Gtpbp8', 'Katnal1', 'Ctu1', 'Tmub1', 'Ipo7', '2610001J05Rik', 'Erp44', 'Lcmt1', 'BC003331', 'Mtm1', 'Mrpl42', 'Cdc40', 'Azi2', 'Psmc3', 'Zfp91', 'Atp5g1', 'Tssc4', 'Thyn1', 'Lcorl', 'Spcs2', 'Zfp189', 'Snx14', 'Enox2', '…	260	4
Elf2	['Dhx36', 'Mtmr9', 'Srbd1', 'Hcfc1', 'Shoc2', 'Sco1', 'Zcchc6', 'Pigm', 'Parg', 'Zranb2', 'Nipbl', 'Strn', 'Hnrnpc', 'Vps13b', 'Rnf185', 'Rfx3', 'Tnks', 'Zc3h13', 'Ccdc9', 'Sf3b2', 'Zfp384', 'Dync1li1', 'Thap1', 'Sugt1', 'Tmem161b', 'Zfc3h1', 'Dhx38', 'Klhl28', 'Taf7', 'Ppil3', 'Fam179b', 'Pik3c3', 'Cggbp1', 'Ddx50', 'Eif5a2', 'Rnf214', 'Dnaic1', 'Sp3', 'Ap1s2', 'Prpf6', 'Zbtb11', 'Krit1', 'Mak16…	251	4
Sin3a	['Nr1h2', 'Csnk1g1', 'Fibp', 'Slc39a9', 'Sfswap', 'Srbd1', 'Cbll1', 'Edc4', 'Usp11', 'Hcfc1', 'Topbp1', 'Yme1l1', 'Trappc8', 'Nek9', 'Uspl1', 'D030056L22Rik', 'Synrg', 'Taf2', 'Usp38', 'Cstf3', 'Adam17', 'Fbxo32', '1700084E18Rik', 'Uggt1', 'Shoc2', 'Exoc1', 'Mbd1', 'Serp2', 'C330027C09Rik', 'Zfp180', 'Eif5a2', 'Slc25a14', '4632415L05Rik', 'Spata5', 'Nup214', 'Tpp2', 'Atoh8', '1110037F02Rik', 'Cep…	224	4
Irf3	['Prr11', 'Tomm40', 'Unk', 'Mtmr4', 'Leng1', 'Cnot3', 'Golph3l', 'Spag7', 'Mlh1', 'Cdca2', 'Cep57', 'Txnip', 'Actl6a', 'Slc2a8', 'Zbtb5', 'Derl2', 'Ppp1r7', 'E2f8', 'Ccne1', 'Camta1', 'Armc1', 'Hist1h3c', 'Dnm2', 'Hist1h2bb', 'Hmgb1', '1110059E24Rik', 'Elp4', 'Iffo1', 'Mrps18b', 'Dnajb5', 'Aimp2', 'Zmynd8', 'Ggct', 'Gart', 'Pcsk4', 'Rab8a', 'Cdc45', 'Pik3ip1', 'Prr12', 'Rnf6', 'Cnn3', 'Kdm4a', 'G…	206	4
Mxi1	['Picalm', 'Ube2b', 'Fam134a', 'Hnrnph2', 'Mfsd1', 'Atp6v0b', 'Dusp1', 'Wwp2', 'Cln3', 'Brox', 'Atp6v0d1', 'Osbpl8', 'Phc3', 'Stx4a', 'Ube2h', 'Rab5a', 'Ctns', 'Zbtb40', 'Tbcel', 'Brdt', 'Braf', 'Tom1l2', 'Bnip3l', 'Mff', 'Slc31a2', 'Fbxo33', 'Mbd5', 'Gtf2a1', 'Rab3il1', 'Chn2', 'Fam117a', 'Lin54', 'Slc43a1', 'Atp6v1a', 'Dazap2', 'Lmnb1', 'Dnajc16', 'Depdc1a', 'Mfhas1', 'Sc5d', 'Eif5a2', 'Trim25'…	199	4
Rest	['A430005L14Rik', 'Rbm25', 'Cdk5rap2', 'Lsm14a', 'Sept7', 'Chfr', 'Ncdn', 'Thap2', 'Zfc3h1', 'Luc7l3', 'Zfp318', 'Sart3', 'Klhl15', 'Exoc7', 'Gltscr2', 'Fuz', 'Zfp688', 'Baz1b', 'Srrm2', 'Arid4a', 'Son', 'Nsf', 'Phf12', 'Rufy3', 'Pigv', 'S100pbp', 'Trim8', 'Nrf1', 'Mtf2', 'Atp6v0c', 'Gopc', 'Zfp764', 'Bptf', 'Dido1', 'Upf3b', 'Htatsf1', 'Prpf38b', 'Dhps', 'R3hdm1', 'Zfp36l2', 'Pias1', 'Baz1a', 'T…	184	4
Bdp1	['Upf2', 'N4bp2', 'Zbtb7a', 'Ino80d', 'Purb', 'Gpbp1', 'Mga', 'Hspa4', 'R3hdm2', 'Vprbp', 'Srrm1', 'Baz1b', 'Gmeb1', 'Gatad2a', 'Ap1g1', 'Eif4g3', 'Ddx23', 'Eif4enif1', 'Bptf', 'Ankhd1', 'Bcl2l1', 'Zfp260', 'Cep250', 'Ddx27', 'Smarcad1', 'Wasf2', 'Pogz', 'Polr2a', 'Macf1', 'Arid4b', 'Cdk12', 'Taok1', 'Ccdc9', 'Phactr4', 'Stag2', 'Srsf3', 'Rbm5', 'Mdm4', 'Cnot6', 'Spen', 'Matr3', 'Pafah1b1', 'Rai1…	183	4
Gtf2b	['H3f3b', 'Pgp', 'Gsk3b', 'Ilf2', 'Pin1', 'Golph3l', 'Shc1', 'Spsb3', 'Dnajb11', 'Recql', 'Fam72a', 'Dnm2', 'Rpain', 'Ccng2', 'Sdf2l1', 'Bahcc1', 'Maea', 'Kdm4a', 'Pms2', 'Ppp1r7', 'Cnpy3', 'Gtf2e1', 'Ficd', 'Pxmp4', 'Yipf4', 'Ppp1r10', 'Asb7', 'Slc25a28', 'Rmnd5a', 'Smad2', 'Tspyl2', 'Xpo1', 'Hmgb1', '2610318N02Rik', 'Ogg1', 'Ercc8', 'Trafd1', 'Rpusd1', 'Anp32a', 'Hexim1', 'Pabpn1', 'Calm2', 'H2…	165	4
Rara	['Fcgr4', 'Rap2c', 'Nckap1l', 'Lcp2', 'Mctp1', 'Laptm5', 'Pik3r5', 'Vwf', 'Mefv', 'Tlr4', 'Csf3r', 'Plaur', 'Siglece', 'Tmem51', 'Pilrb1', 'Dock2', 'Ms4a6b', 'Fcer1g', 'Tbxas1', 'M6pr', 'Nedd9', 'Bcl2a1b', 'Agpat4', 'Nlrx1', 'Ost4', 'Cd14', 'Ehd4', 'Map3k5', 'Rpl34', 'Fcgr1', 'Rnf31', 'Frmd4a', 'Sirpa', 'B430306N03Rik', 'Tbkbp1', 'Cln3', 'Adcy3', 'Rpl34-ps1', 'Prkch', 'Ncf2', 'Zfp513', 'Alox5ap',…	147	4
Elk1	['Cog3', 'Ywhab', 'Mbd1', '8430429K09Rik', 'Efcab7', '4930453N24Rik', 'Sh3bp5l', 'Arcn1', 'Tasp1', 'Pafah1b2', 'Ogg1', 'Lemd3', 'Ino80e', 'Lrrc51', 'Elac2', 'Necap1', 'Stk11ip', 'Hif1an', '2810002D19Rik', '2810403A07Rik', 'Nrk', 'Gm527', 'Wdpcp', 'Asb3', 'Appl1', 'Nsun5', 'Prkdc', 'Fam172a', 'Cdk7', 'Tab3', 'Msl2', '2810021J22Rik', 'Ovca2', 'Tatdn1', 'Cd180', 'St7l', 'Atf7', 'Nup35', 'Matn4', 'Tu…	143	4
Cebpz	['Ddx27', 'Ubtf', 'Cnot1', 'Hnrnpc', 'Nol6', 'Usp4', 'Angptl4', 'Ints3', 'Hspa4', 'Ankhd1', 'Ddx42', 'Gpbp1', '1700008J07Rik', 'Ep300', 'Cse1l', 'Ccdc9', 'Dnmt3b', 'Mdm4', 'Arhgap27', 'Mettl16', 'Naa25', 'Pxn', 'Ddit4', 'Heatr3', 'Setd2', 'Maoa', 'Hmox2', 'Jarid2', 'Srsf3', 'Pif1', 'Upf2', 'Myh9', 'Mospd3', 'Zc3h18', 'Msl2', 'Sbno1', 'Zfhx2', 'Sp2', 'Zfp507', 'Stag2', 'Cdk17', 'Otub1', 'Grb2', 'P…	132	4
E2f6	['Rprd1b', 'Angpt1', 'Hnrnpul1', 'Kcnk3', 'Slc9a5', 'Ctdspl2', 'Hnrnpa2b1', 'Gfra1', 'Cherp', 'Phf6', 'Cdc6', 'Baz1b', 'Zfp217', 'Srsf4', 'Arhgap20', 'Ipo7', 'Rfwd3', 'Bub3', 'Zfp644', 'Slc2a4', 'Sin3a', 'Pcbp1', 'Stag1', 'Zw10', 'Apoo', 'Ubr7', 'Pdp1', 'Fam76a', 'Atp2a2', 'Phtf1', 'Hist1h2ag', 'Cul1', 'Homer1', 'Ehbp1', 'Camta1', 'Tpcn1', 'Npat', 'Brpf3', 'Shc1', 'Ppp2r5d', 'Appl1', 'Ttll5', 'Zf…	126	4
Sp3	['Bola2', 'Ccng2', 'Msh5', 'Sertad3', 'Hist1h4d', 'Mnt', 'Irf2', 'Tnks', 'Zeb2', 'Fgf13', 'Epc1', 'Sdccag8', 'Stag1', 'Rbm28', 'Hnrnpul1', 'Tex2', 'Oxr1', 'Ywhab', 'Calcoco1', 'Coro2a', 'Wdr44', 'Mkln1', 'Ern1', 'Usp15', 'Fmr1', 'Nipbl', 'Sin3a', 'Thoc2', 'Sf3b4', 'Ing1', 'Cep120', 'Gtpbp2', 'Sesn2', 'Cep57l1', 'Mis12', 'Atf7ip', 'Med30', 'Top2b', 'Polr3gl', 'Spen', 'Casp8ap2', 'Trip4', 'Tom1', '…	122	4
Tfdp1	['E2f8', 'E2f1', 'Msh5', 'Pola1', 'Ncapg', 'Stag1', 'Kntc1', 'Tcf19', 'Rbl1', 'Lta4h', 'Hist1h1e', 'Hist1h2bm', 'Hist1h2bj', 'Hist1h2ag', 'Cdc25a', 'Hist1h3c', 'Zw10', 'Xkr5', 'Hist1h3g', 'Zfp438', 'Cntln', 'E2f7', 'Hist1h2bb', 'Iqgap3', 'Hist1h2an', 'Mki67', 'Dtl', 'Ccne2', 'Rfc5', 'Arhgap19', 'Pgp', 'Hist1h1b', 'Lrr1', 'BC030867', 'Chaf1a', 'Zfp711', 'Smc2', 'Tesk2', 'Brip1', 'Kif11', 'Hist1h4h…	121	4
Gfi1	['Prr11', '4930427A07Rik', 'Plk1', 'Hist1h1b', 'Ect2', 'Top2a', 'Ubb', 'Hist1h3a', 'Ncapd2', 'Kcnab2', 'Ung', 'Trim45', 'Med21', 'Recql', 'Msh2', 'Thy1', 'Pif1', 'Racgap1', 'Hist1h3g', 'Hmgb2', 'Med30', 'Ppwd1', 'H2afx', 'Rpa3', 'Mzt1', 'Mki67', 'Calm2', 'Lgals1', 'Rpa2', 'Depdc1a', 'Katnb1', 'Rorc', 'Hist1h2ai', 'Phf6', 'Abhd8', 'Phkg2', 'Dusp10', 'Ndufv3', 'Msh6', 'Psmc3ip', 'Tdrkh', 'Hmgb1', '…	109	4
Gmeb2	['Ubap2l', 'Brd4', 'Pura', 'Ccdc28a', 'Ahr', 'E4f1', 'Foxred1', '1700084E18Rik', 'Gzf1', 'Pafah1b1', 'Zfp335', 'Abce1', 'Dnaja3', 'Api5', 'Prpf38a', 'Hdac9', 'Smndc1', 'Stk11', 'Abt1', 'Phf6', 'Zfp110', 'Helz', 'Atg16l1', 'Spag4', 'Noc4l', 'Ddx51', 'Tial1', 'Baz2b', 'Trp53bp1', 'Unc5c', 'Rnps1', 'Amd1', 'Ppargc1b', 'Cry1', 'Lin54', 'Nat10', 'Nolc1', 'Zbtb5', 'Cbwd1', 'Apc', 'Dmtf1', 'Wee1', 'Mast…	96	4
Sp4	['Zfhx2', 'Inhbb', 'Ddx17', 'Rbm27', 'Ythdc1', 'Mepce', 'Sin3a', 'Cdk12', 'Herc1', 'Chd2', 'Epc1', 'Zfp800', 'Ino80', 'Nipbl', 'Chd3', 'Mex3a', 'Ankrd12', 'Fam109b', 'Rprd2', 'Cnot4', 'Rfx3', 'Arid1a', 'Baz2b', 'Rsf1', 'Wdr44', 'Syncrip', 'Wnk1', 'Tle4', 'Atf7ip', 'Rock1', 'Hist4h4', 'Gpatch8', 'Zmym2', 'Gnl3l', 'Kntc1', 'Zfx', 'Taf1', 'Shprh', 'Cdk19', 'Atm', 'Npat', 'Cdc14a', 'Stag2', 'Numa1', …	94	4
Gmeb1	['Ddx17', 'Epc2', 'Pard6a', 'Nudt3', 'Ndc80', 'Srrm2', 'Lekr1', '4930452B06Rik', 'Rtf1', 'Hnrnpu', 'Mettl4', 'Brd4', '4931428F04Rik', 'Ppp6c', 'Crtc1', 'R3hdm1', 'Cand2', 'Naif1', 'Sp3', 'Zfp516', 'Bcorl1', 'Sik2', 'Nras', 'Txnl4b', 'Slc25a14', 'Tmem175', 'Mesdc1', 'Casc3', 'Racgap1', 'Xpo1', 'Pafah1b1', 'Spin1', 'Rfx1', 'Srsf1', 'Mbtd1', 'Spry2', 'Gramd1c', 'Ppig', 'Rabepk', 'Cenpc1', 'Rnf6', 'F…	93	4
Arid3a	['Tsc22d4', 'Camp', 'Lims1', 'Acap2', 'Mctp1', 'Bin3', 'Hmgn2', 'Clec10a', 'Rnase6', 'Zfp710', 'Cd68', 'Ncf2', 'Ncf4', 'Nedd9', 'B430306N03Rik', 'Cxcr2', 'Lcorl', 'Sp3', 'Arhgef6', 'Ffar2', 'Pik3cg', 'Tnni2', 'Itgal', 'Dapp1', 'Sash3', 'Sept1', 'Rac2', 'Samsn1', 'Vav1', 'Arhgap30', 'Lrmp', 'Gpsm3', 'Fam96a', 'Rhog', 'Spn', 'Rffl', 'Rreb1', 'Fcrla', 'Fam193b', 'Nr4a3', 'Wdfy4', 'Siglece', 'Tnfaip8…	86	4
Stat6	['Arhgap25', 'Stat6', 'Cdipt', 'Alox5ap', 'Pik3r5', 'Apobr', 'Pan3', 'C1qa', 'Fcgr4', 'Cybb', 'Fcer1g', 'Rpl34', 'Klhl28', 'Plek', 'Plekhg1', 'Dok3', 'Grb2', '6530402F18Rik', 'Cd2', 'Ncf2', 'Bcl2a1b', 'Aph1a', 'Il1rn', 'Bcl2a1a', 'Dock2', 'Lcp2', 'Atxn7l3', 'Nckap1l', 'Fbxo28', 'Dr1', 'Pi4kb', 'Zfp710', 'M6pr', 'Bcl2a1d', 'Was', 'Nfam1', 'Kcnk6', 'Rpl34-ps1', 'Irf2', 'Tmem181a', 'Ffar2', 'Rab19',…	83	4
Pou2af1	['Cd79b', 'Foxp1', 'Pold4', 'Vpreb3', 'Blnk', 'H2-Ob', 'Fcrla', 'Cd22', 'Cxcr5', 'Pou2f1', 'Egln2', 'Cd180', 'Mef2d', 'Csk', 'Prkcb', 'Rel', 'Ptpn6', 'Bcl11a', 'Itpr3', 'Cables2', 'Hdac9', 'Lyn', 'Ebf1', 'Polm', 'Nol9', 'St6gal1', 'Grk6', 'Mef2c', 'Nsf', 'Ralgps2', 'Rest', 'Lgmn', 'Hmga1', 'Dok3', 'Arhgap25', 'Spib', 'Cdc25b', 'Foxn3', 'Aff3', 'Lrmp', 'Atp2a3', 'Zbtb5', 'Ppm1l', 'Cd55', 'Mgrn1', …	60	4
Tcf12	['Ilf3', 'Ubn1', 'Ssr1', 'Cbx6', 'Trpm7', 'Zzz3', 'Dnmt3a', 'Mbtd1', 'Ubap2', 'Fmr1', 'Slc43a1', 'Brdt', 'Bptf', 'Lztfl1', 'Gpr19', 'Pkn2', 'Ptbp1', 'Tbcel', 'Actn1', 'Fam195b', 'Atf2', 'Krtcap2', 'Eif1b', 'Pak3', 'Dtx3', 'Ypel5', 'Klhl22', 'Hnrnph3', 'Eef2k', 'Fam168b', 'Aldh18a1', 'Nme2', 'Mxd4', 'Parp6', 'Fam76a', 'Cbx5', 'Cdk20', 'Cdv3', 'Cad', 'Aspscr1', 'Ube4b', 'Chd4', 'Hhip', 'Srek1', 'Zb…	59	4
Ctcf	['Arid1a', 'Ctcf', 'Hnrnpd', 'Phip', 'Fam53b', 'Hmgb1', 'Mllt10', 'Scaf11', 'Nipbl', 'Ubtf', 'Lsm14a', 'Nr2c2', 'Ubap2l', 'Rprd2', 'Baz2a', 'Sephs1', 'Fbxw7', 'Zc3h4', 'Pds5a', 'Rest', 'Xpo1', 'Rnf220', 'Phf12', 'Ddx42', 'Sbno1', 'Srrm2', 'Wbp4', 'Nkrf', 'Pip4k2b', 'Nsd1', 'Pds5b', 'Pdik1l', 'Ppp3cb', 'Zfp800', 'Rfx7', 'Yy1', 'Phrf1', 'Ube2q1', 'Zfp143', 'Cnot6l', 'Mycbp2', 'Atf7ip', 'Letm2', 'Ce…	55	4
Foxp1	['Foxp1', 'Cd55', 'Cd79b', 'Mef2c', 'Pou2af1', 'S1pr1', 'Ms4a1', 'Ebf1', 'Fam43a', 'Tbx3', 'Sipa1', 'Mbnl1', 'Fli1', 'Rasgef1b', 'Rab30', 'Cbx4', 'Plekhm1', 'Pkig', 'Rnf145', 'Phip', 'Rasgrp3', 'Cyth1', 'Bin1', 'Tec', 'Trib2', 'Ralgps2', 'Klhl24', 'Pou2f1', 'Chd7', 'Sox11', 'Reep1', 'Trim7', 'Plekho1', 'Btk', 'Dennd5b', 'Tmcc2', 'Tmem100', 'Slc12a6', 'Cbx7', 'Crbn', 'Khnyn', 'Sema3f', 'Cdk13', 'S…	45	4
Lef1	['Satb1', 'Bcl11b', 'Cd247', 'Lef1', 'Skap1', 'Tox', 'Dusp10', 'Cd28', 'Gtf2i', 'Itk', 'Fyb', 'Zfp281', 'Cbx4', 'Mllt3', 'Sfmbt2', 'Rnf138', 'Stat5b', 'Galnt6', 'Ldb1', 'Kcnmb4', 'Scml4', 'Lcp2', 'Sesn3', 'Sla2', 'Slain1', 'Sh2d1a', '1110034G24Rik', 'Tcf7', 'Peli1', 'Gm11346', 'Tspyl4', 'Itpkb', 'Cdipt', 'Ntrk3', 'Gata3', 'Klf3', 'Nlk', 'Ccnd2', 'Ptpn4', 'Mtap', 'Rcan3', 'Usp3', 'Phf6', 'Dapl1']	44	4
Ep300	['Cdk13', 'Zcchc6', 'Dpp8', 'Senp7', 'Vps13b', 'Snrnp200', 'Mcm3ap', 'Tnks', 'Ipo7', 'Uhmk1', 'Zzef1', 'Zfp518a', 'Zfyve16', 'Zfp60', 'Lcorl', 'Kdm5c', 'Pcm1', 'Gcc2', 'Ppip5k2', 'Zmynd8', 'Dennd1b', 'Vcpip1', 'Pik3cg', 'Hcfc1', 'Utp14a', 'Uggt1', 'Anapc4', 'Eif4ebp2', 'Setdb1', 'Tlk1', 'Mbd5', 'Ralgapb', 'Abcb7', 'Ikbkap', 'Ate1', 'Birc6']	36	4
Stat5b	['Stat5a', 'Stat5b', 'Tbc1d4', 'Lrig1', 'Rara', 'Dusp5', 'Satb1', 'Dip2c', 'Fosl2', 'Rnf19a', 'Socs1', 'Tpt1', 'Fsd1l', 'Batf', 'Pcgf5', '5730508B09Rik', 'Ikzf2', 'Zfp592', 'Orai1', 'Rnf7', 'Prkch', 'Odc1', 'Tnfrsf9', 'Amz2', 'Fas', 'Neto2', 'Elovl6', 'Pja1', 'Tox']	29	4
Mef2d	['Mef2d', 'Cecr2', 'Arid3a', 'Plekhg1', 'Fhl3', 'Lipt2', 'P2rx7', 'Apobec2', 'Nr4a3', 'Foxj2', 'Naif1', 'Chst1', 'Sufu', 'Mphosph9', 'Pou2f2', 'Gpr155', 'Uxs1', 'Dyrk2', 'Sp2', 'Gtf3c4', 'Spata1']	21	4
Tcf7	['Satb1', 'Bcl11b', 'Cd247', 'Lef1', 'Skap1', 'Tox', 'Dusp10', 'Cd28', 'Itk', 'Fyb', 'Sla2', 'Sh2d1a', 'Tcf7', 'Peli1', 'Cd4', 'Il7r', 'Prkcq', 'Cd96']	18	4
Stat5a	['Stat5a', 'Stat5b', 'Zfp664', 'Amz2', 'Satb1', 'Bhlhe41', 'Neto2', 'Odc1', 'Ube2j2', 'Tnip1', 'Batf', 'Tmem86a', 'Pcgf5', 'Vps37b', 'Mlph']	15	4
Rxrb	['Gm12191', 'Rxrb', 'Scamp2', 'Adck2', 'Zfp362', 'Mavs', 'Txndc11', 'B3gntl1', 'Kars', 'Zfp335', 'Ctu1', 'Alg8', 'Mks1']	13	4
Sp1	['Sp1', 'Prpf8', 'Eif2ak4', 'Mga', 'Zfp597', 'Dicer1', 'Ccnk', 'Lcorl', 'Zmym2', 'Ppp4r1l-ps', 'Zfp217', 'Rc3h2']	12	4
Hsf1	['Jmjd6', 'Kctd21', '2210016L21Rik', 'Zfp628', 'Actr3b', 'Zfp777', 'Gtf2b', 'Wdr59', 'Cdkal1', 'Rpl34', 'Naa25']	11	4
Patz1	['Orc4', 'Rbx1', 'Zfp687', 'Kdm4b', 'Ubr7', 'Ndufaf3', 'Ccdc61', 'Numa1', 'Lman2l', 'Xpo1']	10	4
Mecp2	['Alkbh6', 'Zfp27', 'Zfp282', 'Phc2', 'Rbm15', 'Rpl34']	6	4
Gata2	['Ss18', 'Zfp697', 'Rasgrp3', 'Mpo', 'Tbkbp1', 'Grap', 'Kti12', 'Tsg101', 'Zfp410', 'Prkacb', 'Nr1h2', 'Rac1', 'Rasip1', 'Arhgap31', 'Plvap', 'Arhgef3', 'Tmem71', 'Zfp105', 'Ctnna1', 'Eaf1', 'Lrg1', 'Rgs3', 'Pls3', 'Klhl20', 'Arhgap27', 'Elmo1', 'Daxx', 'Ippk', 'Tjp2', 'Caskin2', 'Ushbp1', 'Tmem204', 'Bcl2l1', 'Mmrn2', 'Kifc3', 'Atg16l1', 'Nedd9', 'Rnf31', 'Hspbp1', 'Rgl2', 'Gga1', 'Robo4', 'Rab1…	1052	5
Tal1	['Lmo2', 'Epor', 'Klf1', 'Sox17', 'Plvap', 'Nos3', 'Myct1', 'Mgll', 'Egfl7', 'Hemgn', 'Cdh5', 'Arhgap31', 'Pcdh17', 'Emcn', 'Cd93', 'Herc1', 'Pcp4l1', 'Car1', 'Lpar6', 'Stab1', 'Sez6l2', 'Arrb1', 'Stmn2', 'Cmpk2', 'Fryl', 'Cpox', 'Slc43a1', 'Pcyt1b', 'Vwf', 'Alas2', 'Mkl2', 'Icam2', 'Itga2b', 'Rnf123', 'Nrp1', 'Rffl', 'Sdpr', 'Cbfa2t3', 'Stox2', 'Lyve1', 'Edn1', 'Apbb2', 'Tspan2', 'Cdh13', 'Znfx1…	317	5
Klf1	['Blvrb', 'Iqcd', 'Itsn1', 'Tpcn1', 'Cryzl1', 'Apeh', 'Cast', 'Lpcat3', 'Nmnat3', 'Ypel5', 'Eif2ak1', 'Atp1b2', 'Bard1', 'Micall2', 'Bsdc1', 'Cnnm2', 'D17Wsu92e', 'Mospd1', 'Slc2a4', 'Smarca5', 'E2f8', 'March2', 'Tmem60', 'Gabarapl2', 'Psip1', 'Orc6', 'Xpnpep1', 'Stx2', 'Urod', 'Afg3l2', 'Leprot', 'Tfdp2', 'Isca2', 'Cited4', 'Rfx2', 'Pitrm1', 'Kntc1', 'Cad', 'Chchd7', 'Zc3h13', 'Mrps36', 'Tarsl2'…	178	5
Atf7	['Btbd9', 'Nudt18', 'Sclt1', 'Lrrc14', 'Ddx51', 'Bdp1', 'Stx5a', 'Sap30bp', 'Uba6', 'Ctu2', 'D330041H03Rik', 'Pogz', 'Ppil4', 'Stx4a', 'Nol10', 'S1pr2', 'Pard6a', 'Cbwd1', 'Taf11', 'Srpr', 'Hivep1', 'Zzef1', 'Atl3', 'Spag4', 'Dnajc30', 'Trim39', 'Gpbp1', 'Phf21a', 'Nat10', 'Mga', 'Bnip3l', 'Nsun6', 'Tdg', 'Arl4d', 'Dctn4', 'Slc44a4', 'Pura', 'Ppig', 'Mettl4', 'Golga1', 'Copb1', 'Gmppb', 'Tmf1', '…	122	5
Foxo3	['Hbp1', '1600020E01Rik', 'Foxo4', 'Ube2h', 'Yipf4', 'Isg20', 'Narf', 'Snca', 'Foxo3', 'Tbcel', 'BC052040', 'Xpo7', 'Tfdp2', 'Trim23', 'Taf4b', 'Ccne2', 'C1qtnf3', 'Riok3', 'Gm11346', 'Acbd7', 'Rffl', 'Pogz', 'Orc2', 'Kif3c', 'E2f7', '2610301B20Rik', 'Grap2', 'Hexim2', 'Zfand6', 'Inhba', 'Tmcc2', 'Pitrm1', 'C330018D20Rik', 'Smox', 'Usp53', 'Akap7', 'Hmga2', 'Bcorl1', 'Ccndbp1', 'Tspyl1', 'Cdkn2a'…	78	5
Pbx3	['Arrdc3', 'Irx3', 'Meis2', 'Nck1', 'Sp4', 'Ncoa3', 'Plekha7', 'Pacsin2', 'Hjurp', 'Epha4', 'Cnot6', 'Hivep3', '1500009L16Rik', 'Cetn3', 'Elk4', 'Pbx3', 'Tmem30a', 'Klf3', 'Ptn', 'Extl3', 'Foxc1', 'Mef2c', 'Foxn3', 'Hnrnph3', 'Usp6nl', 'Elk3', 'Dync2h1', 'Ccnd2', 'Mllt6', 'Erbb3', 'Eif4g3', 'Tab2', 'Hoxb4', 'Srcin1', 'Bcl9l', 'Mycn', 'Cyp26b1', 'Sox12', 'Bbc3', 'Msi2', 'BC005537', 'Nog', 'Pak3', …	71	5
Taf7	['Tbcc', 'Cdkn2aip', 'Kitl', 'Epas1', 'Srsf2', 'Sgk1', 'Klf7', 'Ddx5', 'Lims2', 'Spry4', 'Col13a1', 'Ehd1', 'Ccnyl1', 'Gabpb1', 'Adamts1', 'Sez6l2', 'Tspan13', 'Mapre1', 'Calm1', 'Gch1', 'Prelid2', 'Ppp1r10', 'Elf1', 'Chrnb1', 'Fli1', 'Flt1', 'Nasp', 'Stambpl1', 'Ppfibp1', 'Arid3a', 'Icam1', 'Smad6', 'Itga6', 'Ptprg', 'Gdf15', 'Mgll', 'Rgs16', 'Car8', 'Prkd2', 'Tnf', 'Srsf7', 'H3f3b', 'Ddit4', 'P…	62	5
Snai3	['Ppm1h', 'Taf3', 'Lef1', 'Snai3', 'Nsg2', 'Cd247', 'Fgf13', 'Serinc2', 'Srpk1', 'Sit1', 'Def6', 'Arv1', 'Rnf144b', 'Cd3g', 'Ptger4', 'Wasl', 'Sh3gl2', 'Ston2', 'Mbp', 'Abcb9', 'Padi4', 'Ano1', 'Churc1', 'Mllt3', 'Ikzf2', 'AI467606', 'Trp53inp1', 'Scamp5', 'Slc6a9', 'Ccnd2', 'Ctse', 'Snx4', 'Bcl11b', 'Sla2', '2200002D01Rik', 'Slc14a1', 'Smg5', 'Nbeal2', 'Rasgrp1', 'Atp6v0a1', 'Stim1', 'Lat', 'Prk…	52	5
Sox2	['Elf3', 'Atp6v1c2', 'Sox2', 'Isl1', 'Casz1', 'Ehf', 'Foxp2', 'Irx2', '2010300C02Rik', 'Plp2', 'Eya2', 'Zfp428', '2900060B14Rik', 'Btbd11', 'Pmel', 'Nr6a1', 'Gtf2ird1', 'Gprc5a', 'Tuft1', 'Acpp', 'Celf4', 'Nr3c1', 'Srf', 'Aldh1a1', 'Notch1', 'Pdlim1', 'Tiam1', 'Gna14', 'Krt19', 'Dcxr', 'Atp1b1', 'Rnd3', 'Gsto1', 'Iffo2', 'Slc15a2', 'Ngfr', 'Clip4', 'Ndufa4l2', 'Hap1', 'Calm3', 'Fbxo32']	41	5
Tead4	['Tspan13', 'Nrarp', 'Tnfrsf23', 'Rac1', 'Cd36', 'Tinagl1', 'Cdkn2a', 'Tead4', '4921507P07Rik', 'Kbtbd2', 'Nus1', 'Tmem88', 'N4bp3', 'Efna1', 'Samd5', 'Tcf15', 'Dok4', 'Cav2', 'Spns2', 'Scyl2', 'Ehd1']	21	5
Pknox1	['Des', 'Rapsn', 'Ank1', 'Ubn1', 'Rab11b', 'Pde1c', 'Sh3gl1', 'Fam193a', 'Flnc', 'Nck1', 'Deptor', 'Slc39a14', 'Wac', 'Gal', 'Tbc1d15', 'Ppp4r2', 'B4galt7']	17	5
Foxk1	['Dpep2', 'Atg14', 'Tmem164', 'Maml3', 'Cnnm3', 'Megf9', 'Thtpa', 'Fam49a', 'Bahcc1', 'Atg2a', 'Plcb2', 'Il1f9', 'Scml4', 'Dusp16', 'Arhgef10l', 'Epyc']	16	5
Hdac2	['Sox4', 'Psrc1', 'Cks2', 'Ptma', 'Dazap1', 'Dap3', 'Ppia', 'Aqp11', 'Cenpp', 'Ppp5c', 'Sae1', 'Cux1', 'Ccnb1']	13	5
Ahr	-	-	-
Ar	-	-	-
Arnt	-	-	-
Arntl	-	-	-
Atf2	-	-	-
Bach2	-	-	-
Barx2	-	-	-
Clock	-	-	-
Cnot3	-	-	-
Creb1	-	-	-
Creb3l4	-	-	-
Cux1	-	-	-
Elf5	-	-	-
Erf	-	-	-
Etv1	-	-	-
Etv4	-	-	-
Etv5	-	-	-
Foxm1	-	-	-
Foxq1	-	-	-
Gtf2ird1	-	-	-
Hand2	-	-	-
Hif1a	-	-	-
Hivep1	-	-	-
Hivep2	-	-	-
Hmgb1	-	-	-
Hmgb2	-	-	-
Hoxb4	-	-	-
Mecom	-	-	-
Meis1	-	-	-
Meox1	-	-	-
Mlx	-	-	-
Mnt	-	-	-
Msx2	-	-	-
Nfe2l1	-	-	-
Nfix	-	-	-
Ovol2	-	-	-
Pbx1	-	-	-
Plagl1	-	-	-
Prdm1	-	-	-
Rb1	-	-	-
Rbpj	-	-	-
Rfx2	-	-	-
Rora	-	-	-
Runx1	-	-	-
Sall2	-	-	-
Six1	-	-	-
Sox5	-	-	-
Sox6	-	-	-
Tcf4	-	-	-
Tcf7l1	-	-	-
Tead1	-	-	-
Thra	-	-	-
Twist1	-	-	-
Vdr	-	-	-
Ybx1	-	-	-
Zfp668	-	-	-
Zfpm1	-	-	-
Klf4	['Pdlim7', 'Cast', 'Elovl1', 'Vcl', 'Jup', 'Coro1c', 'Iffo2', 'Plec', 'Lamp2', 'Ptrf', 'Anxa8', 'Luzp1', 'Chl1', 'Rab22a', 'Creb3l1', 'Tm2d2', 'Tnks1bp1', 'Rtn4', 'Lman1', 'Arhgap23', 'Rell1', 'Myadm', 'Acer3', 'Tbc1d10a', 'Fam63b', 'Slc25a20', 'Sertad1', 'Morf4l2', 'Dkkl1', 'Habp4', 'Atf5', 'Tuft1', 'Klf3', 'Rnf19b', 'Serpinb2', 'Ralbp1', 'Pmp22', 'Gatad2a', 'Csrp2', 'Rusc1', 'Tubb2b', 'Cited4',…	1061	NA
Nfkb1	['Nfkb2', 'Nfkbia', 'Gpbp1', 'Creb1', 'Tnfaip3', 'Cxcl10', 'Relb', 'Stat5a', 'Appl1', 'Map3k8', 'Cxcl1', 'Rel', 'Ank2', 'Cxcl2', 'Sdc4', 'Tank', 'Steap4', 'Tnip1', 'Arhgef2', 'Cd74', 'Osmr', 'Ccl5', 'Ier2', 'Arl5b', 'Smad3', 'Mapk6', 'Hivep2', 'Egr2', 'Ifngr2', 'Casp4', 'Stx11', 'Actn1', 'Tpbg', 'Cdk17', 'Fas', 'Ptprj', 'Gabpb1', 'Il6', 'Map4k4', 'Psme2', 'Ebi3', 'Dleu2', 'Col11a2', 'Socs2', 'Cpn…	761	NA
Klf9	['Midn', 'Thra', 'Gnao1', 'Tead3', 'Hdgf', 'Ccnd2', 'Col1a1', 'Bcl9l', 'Erf', 'Igfbp5', 'Slc4a2', 'Lasp1', 'Flnc', 'Glis2', 'Zfp36l1', 'Fzd2', 'Nlgn2', 'Nfix', 'Rora', 'Phf21a', 'Flna', 'Pcgf2', 'Cacnb1', 'Vamp2', 'Fosb', 'Bcl3', 'Junb', 'Hook2', 'Sema3b', 'Mmp14', 'Agrn', 'Klf9', 'Tspan31', 'Efnb1', 'Vat1', 'Hic1', 'Arhgap31', 'Tshz3', 'Grasp', 'Kdm6b', 'Wnt6', 'Trerf1', 'Adcy6', 'Ctdsp1', 'Ncam…	599	NA
Nfatc1	['Rcan1', 'Polr2a', 'Mef2c', 'Map3k8', 'Cadm1', 'Plp1', 'Dkk2', 'Ubash3b', 'Ccdc80', 'Isyna1', 'Usp47', 'Rftn2', 'Trim8', 'Tpm3', 'Rilpl2', 'Prrx1', 'Sh2b3', 'Tiam2', 'Tgfb3', 'Epas1', 'Fndc3b', 'Nr4a2', 'Twist2', 'Nfatc1', 'Nfkbia', 'Twist1', 'Icam1', 'Cdk2ap1', 'Bbx', 'Il11ra1', 'Phf21a', 'Ntm', 'Pbx1', 'Il11', 'Chst11', 'Tacc2', 'Mdga1', 'Gli3', 'Lin7a', 'Itga5', 'Dixdc1', 'Ift80', 'Fst', 'Cyt…	508	NA
Klf10	['Coro1c', 'Cyth2', 'Klf10', '2210013O21Rik', 'Gnb2', 'Arf1', 'Plec', 'Ywhaq', 'Vamp3', 'Arrdc4', 'Plscr3', 'Sgk1', 'Ahnak', 'Ywhae', 'Rarg', 'Cpne8', 'Lxn', '1700025G04Rik', 'Vapa', 'Anxa2', 'Clic1', 'Tmem43', 'Rfx2', 'Zfpl1', 'Acvr1b', 'Rab2a', 'Sumo3', 'Slc7a6os', 'Rab5a', 'Rcan1', 'Eif1', 'Slc27a3', 'Med26', 'Elmo2', 'Cast', 'Col11a2', 'Tm2d2', 'Prickle2', 'Dysf', 'Sertad2', 'Stx6', 'Iffo2', …	418	NA
Klf7	['Itsn1', 'Slc2a4', 'Unc13b', 'Myh9', 'Vcl', 'Pgrmc2', 'Coro1c', 'Abcd1', 'Sh2b3', 'Pdlim7', 'Luzp1', 'Srgap2', 'Cnnm2', '4921524J17Rik', 'Orc4', 'Creb3l1', 'Sertad1', 'Slc25a20', 'Stat3', 'Mospd1', 'Nbea', 'Cnot4', 'Lman1', 'Xpnpep1', 'Cyth2', 'Prrc2a', 'Orai1', 'Sox11', 'Acer2', 'Wasf1', 'Trim24', 'Rrbp1', 'Klf13', 'Mfge8', 'Trip10', 'Hlx', 'Qrich1', 'Deptor', 'Myo10', 'Cpd', 'Marcks', 'Atxn2',…	396	NA
Runx2	['Mmp13', 'AI504432', 'Runx2', 'Nucb2', 'Slc39a11', 'Lag3', 'Mkl1', 'Plcb2', 'M6pr', 'Spns3', 'Ltc4s', 'Tmem229b', 'Cd200r1', 'Rgs18', 'Cln3', 'Dmxl1', 'Pag1', 'Nlrx1', 'Tcf7l2', '1810011H11Rik', 'Sh2d1b1', 'Edem2', 'Ppp6r1', 'Bcap31', 'Spn', 'Il18rap', 'Itgal', 'Slamf9', 'Igsf8', 'Runx1', 'Bcl11a', 'Tcf20', 'Apobr', 'Hpse', 'Fbxw4', 'Tgfbr1', 'Atp13a2', 'Soat1', 'Ptprs', 'Lmo4', 'Cd47', 'Dync1i2…	306	NA
Vezf1	['Nufip2', 'Dnmt3a', 'Tug1', 'Klhl21', 'Prdm16', 'Zbtb10', 'Ahdc1', 'Pik3r1', 'Plec', 'Ctdspl', 'Ap4s1', 'Fam53c', 'Atxn7', 'Mex3a', 'Chd3', 'Ccnd2', 'Fbxo11', 'Phf21a', 'Mbd5', 'Hoxb4', 'Hoxc6', 'Pafah1b1', 'Pea15a', 'Bcl9l', 'Stag2', 'Sp4', 'Tsc22d1', '9930021J03Rik', 'Bcor', 'Nfix', 'Gdi1', 'Max', 'Smarca2', 'Vamp2', 'Auts2', 'Armcx2', 'Trim8', 'Cdk12', 'Chd4', 'Rere', 'Gsk3a', 'Bcam', 'Dlk1',…	257	NA
Bptf	['Gigyf1', 'Rere', 'Jund', 'Ppp1r9a', 'Wipf2', 'Ubtf', 'Atxn1', 'Hnrnpc', 'Zfp362', 'Gse1', 'Stx16', 'Slc44a2', 'Rpgrip1', 'Ebf1', 'Vgll4', 'Bcor', 'Stk38', 'Phactr4', 'Tnrc18', 'Mga', 'Brd4', 'R3hdm2', 'Chd7', 'Igf2bp3', 'Mllt10', 'Rbms2', 'Dennd5a', 'Arid1a', 'Zfp217', 'Myh9', 'Nol6', 'Gtf3c2', 'AI846148', 'Fbxl20', 'Smarca2', 'Zfhx2', 'Qrich1', 'Spag9', 'Nfat5', 'Taok1', 'B330016D10Rik', 'Pcdh…	225	NA
Jdp2	['C3ar1', 'Mmp19', 'Emilin2', 'Ubash3b', 'Cd68', 'Il1rn', 'Zfp516', 'Anxa2', 'Tbxas1', 'Cd14', 'Msr1', 'Slc7a11', 'P2ry6', 'Ccl17', 'Psap', 'Il1b', 'Ccl7', 'Bcl2a1b', 'Bcl2a1d', 'Bcl2a1a', 'Rffl', 'Cd63', 'Slamf9', 'Ccrl2', 'Cfp', 'Dab2', 'Antxr2', 'Clec4e', 'Ccl24', 'Clec7a', 'Ahr', 'S100a11', 'Nlrp3', 'Snx10', 'Gcnt2', 'Slc15a3', 'C1qc', 'Mrc1', 'Tac1', 'Ppfia4', 'Padi4', 'Sqstm1', 'Ccr7', 'Cap…	215	NA
Twist2	['Dpt', 'Serpine1', 'Prelp', 'C1qtnf1', 'Tnfaip6', 'Apod', 'Fap', 'Svep1', 'Fhl1', 'Emilin1', 'Gli3', 'Mxra8', 'Pdgfra', 'Nfia', 'Sh3kbp1', 'Fzd1', 'Etv1', 'Fzd2', 'Wfdc1', 'Il1r1', 'Ltbp1', 'C1ra', 'Gsn', 'Lrrn4cl', 'S1pr2', 'Adamtsl1', 'Tpbg', 'Zfp580', 'Psd3', 'Ddr2', 'C1qtnf6', 'Ntrk2', 'Ak1', 'Nptn', 'Nlgn2', 'Itgbl1', 'Mmp2', 'Thbs3', 'Maged1', 'Cry2', 'Ank2', 'Wdr92', 'Col3a1', 'Tbx18', 'R…	140	NA
Foxp4	['Hivep2', 'Rictor', 'Ptbp2', 'Cxxc5', 'Gse1', 'Trim8', 'Foxp4', 'Fam53c', 'Zfp703', 'Nedd4l', 'Slc6a6', 'Maml3', 'Plekha5', 'Fzd7', 'Rab3a', 'Tmem2', 'Tgif1', 'Mapk3', 'Ephb3', 'Fgfr2', 'Fhdc1', 'Eya2', 'Cdc42ep4', 'Actg2', 'Smad3', 'Sp1', 'Fam178b', 'Csnk1e', 'Dusp16', 'Slc34a2', 'Akt2', 'Mtmr12', 'Sox9', 'Picalm', 'Srsf9', 'Rhbdd1', 'Syne1', 'Fgfbp3', 'Etv5', 'Ppard', 'Tmem218', 'Bcl6', 'Zfp86…	133	NA
Hoxa10	['Atf3', 'Ntf3', 'Tmem150a', 'Pop5', 'Tbx2', 'Per1', 'Ubap2l', 'Pkdcc', 'Fxyd2', 'Fosb', 'Wfdc1', 'Mtx1', 'Dkk2', 'Kifc3', 'Hoxb7', 'Smarca2', '1190002N15Rik', 'Gprc5a', 'Col1a1', 'Hoxa10', 'Hic1', 'Bdnf', 'Osr1', 'Hoxb6', 'Slc25a4', 'Nuak2', 'Fos', 'Fblim1', 'Llgl2', 'Svep1', 'Vcl', 'Slc39a8', 'Hoxb8', 'Tcea3', 'Tbc1d1', 'Tmem147', 'Atxn1', 'Hnrnph1', 'Wnt2', 'Meis2', 'Sdc4', 'Tesc', 'Wls', 'Cdc…	93	NA
Zbtb33	['Rc3h2', 'Qrich1', 'Ino80', 'Rnpc3', 'Smg7', 'Cul3', 'Polr2b', 'Ndufa7', 'Pign', 'Dido1', 'Hdac6', 'Dhx37', '2810006K23Rik', 'Cnnm2', 'Grk4', 'Ap4e1', 'Snx13', 'Ranbp9', 'Rev1', 'Eed', '6330408A02Rik', 'Cramp1l', 'Kpna3', 'Ddx17', 'Zfp384', 'Trim39', 'Extl2', 'Zc3h4', 'Sos2', 'Usp31', 'Aptx', 'Setd1a', 'Ube2q1', 'Usp9x', 'Sox6', 'Tbc1d8b', 'Zzef1', 'Gosr2', 'Cab39l', 'Suox', 'Nanp', 'Sdf2l1', 'W…	92	NA
Max	['Nr6a1', 'Max', 'Enkur', 'Ctdp1', 'Arl2bp', 'Dach1', 'Gabarapl2', 'Phc2', 'Klf13', 'Pdrg1', 'Mxd1', 'Ube2b', 'Phyhipl', 'Fhl3', 'Scrg1', 'Foxp4', 'Bbip1', 'Nfatc2', 'Pwwp2a', 'Syne1', 'Tmem164', 'Sdk2', 'Sun2', 'Ankrd12', 'Rnf2', 'Lrp8', 'Rbm33', 'Eno1', 'Tmc6', 'Pdss2', 'Khdrbs1', 'Foxo1', 'Rbm15b', 'Ppp1r1b', 'Arpc5', 'Fgd4', 'H3f3a', 'Dnajc8', 'Bbc3', 'Sfmbt2', 'Traf3ip3', 'Dyrk2', 'Fam117a',…	84	NA
Foxj2	['BC048403', 'Tlr4', 'Nlrx1', 'Rab3gap2', 'Zranb3', 'Cnnm3', 'Maml3', 'Luc7l2', 'Rara', 'Trerf1', 'Zfp362', 'Tcf7l2', 'Mgrn1', 'Crtc2', 'Rad21', 'Rnf44', 'Ppp3ca', 'Furin', 'Fbxl4', 'Vcpip1', 'Txnip', 'Cbx2', 'Rab11fip2', 'Napg', 'Epha7', 'Pogz', 'Rhof', 'Zscan12', 'Ncoa1', 'Hoxa4', 'Phlpp1', 'Abcc5', 'Efcab1', 'Tbl1xr1', 'Ipo13', 'Tnpo3', 'Clasp2', 'Mark1', '1110051M20Rik', 'Rab3a', 'Soat1', 'Tn…	61	NA
Sox9	['Fxyd3', 'Fgfrl1', '4930523C07Rik', 'S100b', 'Chad', 'Klhl21', 'Mcoln2', 'Acan', 'Abtb2', 'Runx1', 'Ppp1r1b', 'Samd4', 'Tgfa', 'Tnfrsf11b', 'Rin2', 'Mtss1l', 'Foxp4', 'Gpd2', 'Ptn', 'Col8a2', 'Gse1', 'Scrg1', 'Cdk2ap1', 'Mras', 'Sobp', 'Rtkn', 'Phc2', 'Foxp2', 'Tubb2b', '2610203C20Rik', 'Ctgf', 'Col9a3', 'Pak1', 'Capn6', 'Cdc42se1', 'Fgfr3', 'Col9a1', 'Fkbp1b', 'Shf', 'Col11a2', 'Cytl1', 'Ccnj',…	56	NA
Pitx1	['Isl1', 'Tpm2', 'Klc3', 'Ndufa4l2', 'Pitx1', 'Barx2', 'Pkp3', 'Ctnnbip1', 'Wnt4', 'Gtf2ird1', 'Tuba8', 'Eif1ax', 'Lpin3', 'Cish', 'Ephb6', 'Frat2', 'Clip1', 'Bbs2', 'Jup', 'Igsf9', 'Il1f9', 'Cast', 'Megf9', 'Ptk7', 'Ola1', 'Slc26a2', 'Krt10', 'Cpne5', 'Fam57a', 'Polr3g', 'Capn1', '4931428F04Rik', 'Chl1', 'Dohh', 'Tubb3', 'Fabp5', 'Prdm1', 'Ptges', 'Slc25a29', 'Aldh3b2', 'Zfp185', 'Hspb8', 'Acsbg…	55	NA
Rfxank	['Letm2', 'Nog', '1700109H08Rik', 'Srl', 'Nek3', 'Actr6', 'Ctu1', 'Poli', 'Fitm2', 'Ints3', 'Lysmd4', 'Ccdc17', 'Camk2a', 'Efnb3', 'Ndrg4', 'Plekha7', 'Tubgcp6', 'Nsun4', 'Angpt1', 'Asb2', 'Clasp1', 'Zfp770', '4931414P19Rik', 'Cant1', 'Lin54', 'Map2k5', 'Aldh1b1', 'Mtr', 'Zfp574', 'Sspn', 'Cnot8', 'Pcmtd2', 'Fbxw7', 'Pde1c', 'Fkrp', 'Klhl26', 'Dyrk1b', 'Asb8', 'Hpgds', 'Slc25a15', 'Smarcad1', 'Gt…	53	NA
Klf13	['Rara', 'Ccnd2', 'Atxn7l3', 'Gnb2', 'Flna', 'Fmnl1', 'Klf3', 'Vasp', 'Max', 'Srgap2', 'Trim8', 'Emp3', 'Fbxl19', 'Zmiz1', 'Ppp1r9b', 'Zfp740', 'Ppm1j', 'Elk3', 'Agpat4', 'Gnai2', 'Arhgap9', 'Rassf5', 'Bbc3', 'S100a10', 'Zfp217', 'Csnk1g1', 'Myl6', 'Arf3', 'Sept9', 'Stk38', 'Nod1', 'Camkk2', 'Cdc42ep3', 'Cic', 'Clic1', 'Maml2', 'Sertad3', 'AI413582', 'Mbnl1', 'Gsk3b', 'Atp1a3', 'Tmc6', 'Erg']	43	NA
Nr1d1	['Dbp', 'C1qtnf4', 'Pde5a', 'Nr1d1', 'Kctd15', 'Ulk1', 'Grem2', 'Gria3', 'Nr1d2', 'Kcnk2', 'Yap1', 'Tcf21', 'Pamr1', 'Arhgef5', 'Ddx3y', 'Tacc2', 'Pard3', 'Tead3', 'Wnt2', 'Fam135a', 'Pfkfb2', 'Nab1', 'Smyd2', 'Ptpn3', 'Pknox2', 'Usp6nl', 'Ppm1a', 'Ephb3', 'Clock', 'Ammecr1l', 'Egflam', 'Csdc2', 'Sh3d19', 'Me1', 'Amph', 'Vegfa', 'Cdh11', 'Mapkbp1', 'Zbtb7a', 'Atn1', 'Osr1', 'Twf1']	42	NA
Nr1h2	['Zfp512', 'Pnpla2', 'Lipe', 'Sbno2', 'Pcdh1', 'Ctbp2', 'Rgl2', 'Inpp5a', 'Pnpla6', 'Parp6', '2410002F23Rik', 'Rhot1', 'Sigirr', 'Cant1', 'Acvrl1', 'Lca5', 'Zfp787', 'Xab2', 'Mark4', 'Stard3', 'Ptp4a3', 'Nrarp', 'Arhgef2', 'N4bp3', 'Chn2', 'Tbkbp1', 'Camta1', 'Hspa12b', 'Agpat1', 'Camk2g', 'Nes', 'Plvap', 'Parvb', 'Pigv', 'Pear1', 'Rmnd5b', 'Dctn1', 'Phrf1', 'Vps37c', 'Tinagl1']	40	NA
Prrx2	['Nfatc1', 'Dkk2', 'Ntrk2', 'Mdga1', 'Omd', 'Lox', 'Scara3', 'Creb3l1', 'Fzd2', 'Col12a1', 'Tgfbr3', 'Twist2', 'Zcchc24', 'Gli3', 'Wfdc1', 'Lgals1', 'Nfix', 'Rspo3', 'Fn1', 'Col1a2', 'Tmem65', 'Loxl2', 'Creb5', 'C1qtnf6', 'Fzd1', 'Fam102b', 'Atp10a', 'Meg3', 'Rhobtb3', 'Kri1', 'Mrc2', 'Htra1', 'Islr', 'Col1a1', 'Matn2', 'Loxl3', 'Kdelr3', 'Sfrp2']	38	NA
Tcf3	['Prpf3', 'Mta2', 'Poll', 'Arpc5l', 'Ap1m1', 'Zbtb12', 'Hnrnpd', 'Nup214', 'Mrpl43', 'Mad2l1bp', 'Sf3a3', 'Foxred1', 'Tmem138', 'Ubap2l', 'Cnp', 'Zfp362', 'Pars2', 'Zfp553', 'Tyw1', 'Usp11', 'E2f4', 'Btbd1', 'Snx12', 'Ppp1r7', 'Snip1', 'Nubp2', 'Fiz1', 'Mgat1', 'Exosc3', 'Mcrs1', 'Usf1']	31	NA
Nr2f1	['Myh11', 'Nr2f1', 'Dmd', 'Pbx1', 'Sh3bgr', 'Lhfp', 'Fam178b', 'Slc4a3', 'Ntrk3', 'Speg', 'Cog7', 'Wnt6', 'Camk2g', 'Fxyd1', 'Plp1', 'Usp2', 'Crispld2', 'Msl3l2', 'Sema3b', 'Daam2', 'Tpm2', 'Emilin1', 'Angptl2', 'Ppm1l', 'Smarcd3', 'Ntm', 'Afap1l2', 'Abl1', 'Olfm1', 'Zfp532']	30	NA
Brf1	['Agbl5', 'Polg', 'Elmo3', 'Sema4b', 'Bcdin3d', 'Rpusd3', 'Fam175b', 'Inha', 'Kat5', 'Gtf2f1', 'Arl6ip6', 'Dlk1', 'Lin37', 'Dbr1', 'Rbck1', 'Tk2', 'Rpap1', 'Dnajb12', 'Prdm10', 'Spata7', 'Tagap1', 'Pigb', 'Tmc6', 'Nupl2']	24	NA
Lhx2	['Pars2', 'Efna2', 'Amot', 'Etv5', 'Prdm16', 'Col11a2', 'Lhx2', 'Nr4a3', 'Gramd1c', 'Sned1', 'Dio2', 'Dlk1', 'Ankrd13b', 'Wif1', 'Whrn', 'Usp21', 'Fzd9', 'Col8a2', 'Nfatc2', 'Tctn3', 'Hapln1', 'Abtb2']	22	NA
Gli3	['Dtx3', 'Gpm6b', 'Postn', 'Tpbg', 'Acbd7', 'Rhoq', 'Nlgn2', 'Rhbdf1', 'Nfix', 'Twist2', 'Flrt2', 'Igfbp5', 'Dclk1', 'Vasn', 'Pdgfrb', 'Frmd6', 'Ahi1', 'Dlg4', 'Inhba']	19	NA
Meis2	['Gmfg', 'Meis2', 'Egfl8', 'Ehd3', 'Fmnl2', 'Osbpl5', 'Irx3', 'Cldn15', 'Calcrl', 'Dram1', 'Calca', 'H2afy2', 'Fam117b', 'Slc25a4', 'Dnajb4', 'Prickle2', 'Cdc14a', 'Rab3b']	18	NA
Fhl2	['Fam167a', 'Speg', 'Sox10', 'Etv4', 'Ndrg4', 'Arhgef19', 'Il11', 'Myl6', 'Nrtn', 'Gjb3', 'BC022687', 'Ank1', 'Apobec2', 'Fbxo42', 'Emid1', 'Smtn', 'Myl9']	17	NA
Hoxb8	['Hoxa7', 'Hoxb8', 'Hoxb6', 'Enpp5', 'Itpr1', 'Phyhipl', 'Mecom', 'Hoxa9', 'Cd164l2', 'Hoxc6', 'Hes1', 'Dhrs3', 'Arid3a', 'Irx1', 'Tanc1', 'Hoxb7', 'Hoxc9']	17	NA
Pou2f1	['Pou2f1', 'Sin3a', 'Ap4e1', 'Fgd3', 'Ar', 'Traf3ip1', 'Tnrc6a', 'Ube2w', 'Gabpb2', 'Zfp518a', 'Tmed8', 'Whrn', 'Exoc4', 'Car1', 'Phf12']	15	NA
Hdac1	['Vta1', 'Gtf2f1', 'Fam192a', 'Ubtf', 'Taf15', 'Ywhah', 'Hnrnpu', 'Cdc37', 'Fip1l1', 'Taf6', 'Trp53', 'Ddx20', 'Hdac1']	13	NA
Pura	['6530402F18Rik', 'Phf21a', 'Chd3', 'Gabbr1', 'Phf1', 'Ncdn', 'Zfp687', 'Kcne3', 'Bbx', 'Pura', 'Malat1', 'Zmym4', 'Trim39']	13	NA
Rfxap	['Pin1', 'Ywhaq', 'Lmo1', 'Fam167a', 'Psrc1', 'Csnk1d', 'Cngb1', 'Ccdc163', 'Pard6a', 'Lsm14b', 'Crip1', 'Dcun1d5', 'Rfxap']	13	NA
Zbtb17	['Sox10', 'Fbrs', 'Efhd2', 'Aldh1a3', 'Tnni3', 'Eps8l1', 'Tmem158', 'Rala', 'Slc4a8', 'Cd3eap', 'Arf6', 'Mycn', 'Sf1']	13	NA
Gtf2i	['Chd3', 'Ikzf2', 'Lef1', 'Klk8', 'Elovl6', 'Ss18', 'Mgea5', 'Zfhx2', 'Cnst']	9	NA
Zbtb7b	['Mink1', 'Mycbp', 'Camk1d', 'Sema4a', 'Hmgcr', 'Cxcr4', 'Slc9a3r1', 'Nadk', 'Tecr']	9	NA
Pou3f1	['Plp1', 'Pou3f1', 'Atf3', '2900060B14Rik', 'Aoc3', 'Bcas1', 'Gatm', 'Ing2']	8	NA
Rfx1	['Tasp1', 'Rpp38', 'Dcaf15', 'Ctu1', 'Zfp653', 'Slc35b3', 'Mef2d', 'Rfx1']	8	NA
Stat4	['Satb1', 'Lfng', 'Tagap', 'Arhgap9', 'Laptm5', 'Nkg7', 'Cytip']	7	NA
Hmga1	['Hoxa9', 'Pabpc1', 'Hmga1', 'Trim7', 'Cdk6', 'E2f3']	6	NA
Tfcp2	['Zfp507', 'Clec16a', 'Galnt1', 'Usp46', 'Intu', 'Tex9']	6	NA
Mxd1	['Nfe2', 'Osm', 'AA467197', 'Cxcr2', 'Prdm1']	5	NA
Nr6a1	['Nr6a1', 'Acbd7', '1110017D15Rik', 'Dlg3', 'Polr1a']	5	NA
Sp100	['Irf2', 'Ppp1r12a', 'Fli1', 'Bin1', 'Klf2']	5	NA
Tbx3	['Slco2a1', 'Dusp6', 'Apln', 'Hpgd', 'Sox11']	5	NA
Nfatc3	['Dcaf15', 'Phkg2', 'Zfp646', 'Eapp']	4	NA

## Sheet: Regulon_TMSS2
Regulon	GeneComposition(All_atlas_merged)	NumGenes	RegulonModule
Elk3	['Eaf1', 'Ap1m1', 'Ctnna1', 'Rac1', 'Ppp4c', 'Extl3', 'Fli1', 'Rasgrp3', 'Bin3', 'Kti12', 'Tbc1d22a', 'Pik3cg', 'Arpc2', 'Mpo', 'Klhl6', 'Hccs', 'Zfp697', 'Gng11', 'Ccnt1', 'Osmr', 'Vps25', 'Dusp6', 'Tbkbp1', 'Fam188a', 'Tmem204', 'Rab11a', 'Pcyt1a', 'Lcp2', 'Mdm4', 'Sf3a3', 'Cradd', 'Grap', 'Rgl2', 'Clasp1', 'Mcm3', 'Sh3gl1', 'Ywhab', 'Nosip', 'Mta2', 'Ascc2', 'Cd93', 'Arpc3', 'Uaca', 'Gpn2', 'S…	1344	1
Cebpb	['Chac1', 'Lcn2', 'Slc7a11', 'Pfn1', 'Il6ra', 'Ddit3', 'Dram1', 'Zfp36l2', 'Cdc42se1', 'Maf', 'Actb', 'Per1', 'Dmkn', 'Hsd11b1', 'Rara', 'Jdp2', 'Ptx3', 'Rnf149', 'Col13a1', 'Slco2a1', 'Ssbp2', 'Atoh8', 'Gnas', 'Prmt1', 'Ptgs2', 'Samd4', 'Krt10', 'Wfdc2', 'Jun', 'Lmo4', 'Krt23', 'S100a8', 'Trib1', 'Tpm1', 'Aldh3b1', 'Steap4', 'C3', 'Ubash3b', 'Sesn2', 'Nfkbiz', 'Il1rn', 'Ccr2', 'Coq10b', 'Prkg1',…	1078	1
Irf1	['Rtp4', 'Polr2a', 'Usp18', 'Map3k8', 'Fbn1', 'Rspo3', 'Irf2', 'Ifit3', 'Dusp10', 'Cxcl10', 'Isg15', 'Dkk2', 'Oasl1', 'Gnb4', 'Vgll4', 'Itpkb', 'Meis2', 'Bdnf', 'B2m', 'Zbp1', 'Zfand5', 'Socs1', 'Fam117b', 'Dnpep', 'Arhgap28', 'Nedd9', 'Cd274', 'Uba7', 'Plekha3', 'H2-K2', 'Atoh8', 'Bcl2a1d', 'Gadd45b', 'H2-K1', 'Ccl5', 'Gadd45g', 'H2-Q6', 'Cdipt', 'Parp14', 'Ifit1', 'Meg3', 'Runx3', 'H2-D1', 'Fam…	712	1
Ets2	['Ippk', 'Mettl6', 'Eaf1', 'Ctnna1', 'Rac1', 'Ppp4c', 'Lypla2', 'Tbc1d22a', 'Arpc2', 'Zfp410', 'Tbc1d8', 'Gng11', 'Mark2', 'Ccnt1', 'Zfp655', 'Osmr', 'Sfswap', 'Dusp6', 'Tbkbp1', 'Fam188a', 'Tmem204', 'Rab11a', 'Dhx38', 'Isy1', 'Vmp1', 'Smug1', 'Arih2', 'Rgl2', 'Clasp1', 'Mapk1ip1l', 'Srsf5', 'Ywhab', 'Mta2', '4930453N24Rik', 'Cd93', 'Arpc3', 'Ube2n', 'Uaca', 'Fam96b', 'Midn', 'Sptlc2', 'Serpinb6…	690	1
Cebpd	['Ssbp2', 'Rbp4', 'Fosb', 'Dram1', 'Nfatc1', 'Svep1', 'Epas1', 'Prrx1', 'Jdp2', 'Col13a1', 'Il6ra', 'Ahnak', 'Maf', 'Atoh8', 'Ace', 'Ltbr', 'Nfkbiz', 'Dkk2', 'Tpm1', 'Osmr', 'Fermt2', 'Nf1', 'Ctnna1', 'Sh3gl1', 'Per1', 'Scara3', 'Vim', 'Tbx2', 'Slco2a1', 'Hoxa5', 'Coq10b', 'Jun', 'Srsf2', 'Ptgs2', 'Osr1', 'Cdkn1c', 'Herpud1', 'Peli2', 'Rara', 'Dlg4', 'Mat2a', 'Nup98', 'Trib1', 'Tac1', 'Maff', 'Gl…	673	1
Bcl3	['Nfkb2', 'Nfkbia', 'Nfkbiz', 'Tnfaip3', 'Gadd45b', 'Cxcl10', 'Icam1', 'Relb', 'Stat5a', 'Ltb', 'Map3k8', 'Dusp6', 'Cxcl1', 'Rel', 'Gt(ROSA)26Sor', 'Cxcl2', 'Sdc4', 'Tank', 'Elf3', 'Tnip1', 'Cd74', 'Dnaja1', 'Osmr', 'Tslp', 'Ier2', 'Neurl3', 'Dusp5', 'Mapk6', 'Hivep2', 'Ier3', 'Egr2', 'Lmnb1', 'Irf1', 'Casp4', 'Stx11', 'Ccnl1', 'Pou2f2', 'Tpbg', 'Dennd4a', 'Fas', 'Wisp1', 'Gabpb1', 'Il6', 'H2-Q6'…	659	1
Stat3	['Icam1', 'Cish', 'Hspe1', 'Il6st', 'Sphk1', 'Bhlhe40', 'Ccl2', 'Mafk', 'Igf2bp2', 'Nup153', 'Map3k14', 'Sntb2', 'Taf4b', 'Dnaja1', 'Psd', '1810022K09Rik', 'March5', 'AW551984', 'Osmr', 'Nfkb2', 'Chchd4', 'Tmem43', 'Zc3hav1', 'Ankrd28', 'Phf23', 'Plekha3', 'Myd88', 'Top1', 'Tmed5', 'Taf7', 'Flot1', 'Tmx3', 'Egr2', 'Mt1', 'Etv6', 'Lats1', 'Runx1', 'Nufip2', 'Arhgap1', 'Arhgef7', 'Pprc1', 'Map3k8',…	578	1
Crem	['Dusp1', 'Gla', 'Tpm4', 'Tmem39a', 'Vps37b', 'Arg2', 'Ing3', 'Ell2', 'Ralgapa1', 'Flt1', 'Nup98', 'Gem', 'Baz2b', 'Maff', 'Nr4a2', 'Dhx36', 'Ppp1r15a', 'Fbxo33', 'Areg', 'Fn1', 'Nfatc2', 'Relb', 'Sik1', 'Trib1', 'Arl5b', 'Cltb', 'Rbms2', 'Psmb2', 'Insig1', 'Fau', 'Wsb1', 'Btg1', 'Letm2', 'Morf4l2', 'Zfand5', 'Hsp90ab1', 'Larp7', 'Klf13', 'Ttc19', 'Arl4d', 'Rel', 'Ahr', 'Xrn2', 'Efr3a', 'Trp53inp…	530	1
Tfe3	['Picalm', 'Aff4', 'Slc35a5', 'Nptn', 'Atp6v0b', 'Gla', 'Tmem55b', 'Cln3', 'Slc35b2', 'Sppl3', 'Hps3', 'Rab3il1', 'Dip2b', 'Fbxw4', 'Mafg', 'Hmox1', 'Pcgf2', 'Calr', 'Clcn7', 'Batf3', 'Rapsn', 'Fnip1', '0610040J01Rik', 'Tef', 'Gns', 'Elmo2', 'Sumf1', 'Ctsd', 'Bmp2k', 'Stt3a', 'Commd8', 'Capza2', 'Mef2a', 'Chn2', 'Dnajb9', 'Arhgap12', 'Gba', 'Selplg', 'Adnp2', 'Cltc', 'Ak8', 'Orai1', 'Tmed10', 'Ub…	513	1
Nfil3	['Fosb', 'Atf3', 'Creb5', 'Jdp2', 'Angptl1', 'Rbp4', 'Filip1l', 'Btg1', 'Fn1', 'Ccl27a', 'Il1rn', 'Inhba', 'Nfkbiz', 'Runx1t1', 'Tmem39a', 'Ube2b', 'Akt2', 'Tars', 'Ptp4a1', 'Zyx', 'Coq10b', 'Slco2a1', 'Tnfaip3', 'Vps37a', 'Arid5b', 'Osm', 'Pycr1', 'Ptgs2', 'Nr1h3', 'Gadd45g', 'Plk3', 'Ccl4', 'Zfand2b', 'Flrt3', 'Zfp516', 'Klf6', 'Car3', 'Fos', 'Ahr', 'Peli2', 'Mxd1', 'S100a9', 'Serpinf1', 'Cdk2a…	480	1
Tgif1	['Ube2h', 'Tead1', 'Tpm4', 'Vps37b', 'Gpbp1', 'Dusp1', 'Ell2', 'Fosb', 'Arg2', 'Cnnm4', 'Ppp2ca', 'Lrrc8a', 'Suv39h2', 'Zfp593', 'Tmem39a', 'Filip1l', 'Btg2', 'Ints7', 'Ldha', 'Senp2', 'Nup98', 'Dusp8', 'Areg', 'Pdlim3', 'Sik1', 'Gem', 'Trib1', 'Relb', 'Gas5', 'Map1lc3a', 'Rce1', 'Usp36', 'Rps29', 'Opa3', 'Zbtb11', 'Nr4a2', 'Akirin1', 'Gprc5a', 'Ccnl1', 'Appbp2', 'Rbm3', 'Taf4b', 'Xrn2', 'Cxcl16'…	409	1
Foxo1	['Zfp668', 'Rps18', 'Ccnt1', 'Fam63b', 'Ube2n', 'Pik3r4', 'Zfp410', 'Gnai3', 'Chd2', 'Mdm4', 'Lypla2', 'Dnajb9', 'Polr2a', 'Eaf1', 'Nipbl', 'Edc4', 'Fibp', 'Lrrc49', 'Polr2h', 'Syvn1', 'Stk4', 'Xrn2', 'Fbxo8', 'Mfap1b', 'Tfam', 'Phf23', 'Ttc1', 'Usp38', 'Med19', 'Zfp653', 'Zranb2', 'Arpc5l', 'Nprl2', 'Eif3g', 'Herc4', 'Mtmr9', 'Tssc4', 'Wdr76', 'Mfap1a', 'Lsm1', 'Zfp655', 'Bag4', 'Sox17', 'Zbtb11…	310	1
Bach1	['Ubap2l', 'Picalm', 'Ilf3', 'Wls', 'Patl1', 'Tac1', 'Arhgap12', 'Mafg', 'Slc38a7', 'Taf4b', 'Arpc5', 'Hps3', 'Batf3', 'Bloc1s3', 'Slc43a1', 'Gba', 'Eif4a1', 'Ctsd', 'Rab3il1', 'Zfyve26', 'Atp6v1a', 'Rapsn', 'Ppp1r3b', 'Tmem131', 'Hmox1', 'Hnrnpf', 'Rreb1', 'Runx1', 'Rara', 'Gna13', 'Bmp2k', 'Ip6k1', 'Commd8', 'Nras', 'Tnrc6b', 'Prpf39', 'Cry1', 'Pdp1', 'Naglu', 'Akap10', 'Hk2', 'Atp6v0c', 'Rdh5'…	296	1
Mef2a	['Ccnd1', 'Pik3cb', 'Usp2', 'Zfp668', 'Trim8', '2510039O18Rik', 'Plod1', 'Clip1', 'Itpkb', 'Yes1', 'Slc3a2', 'Orai1', 'Ep300', 'Mef2d', 'Spen', 'Maml3', 'Bcor', 'Sdc3', 'Smad7', 'Mdm2', 'Slc44a2', 'Smad3', 'Ino80d', 'Phactr4', 'Arhgap27', 'Zfp143', 'Gatad2a', 'Cbfa2t2', 'Akr1b10', 'Ptrf', 'Zfp362', 'Per1', 'Espl1', 'Rb1cc1', 'Luc7l3', 'Cbl', 'Gjc1', 'Mettl3', 'Snx10', 'P2rx7', 'Usf2', 'Rac1', 'Sl…	248	1
Sox17	['Polr2a', 'Spry4', 'Phlpp1', 'Fermt2', 'Atoh8', 'Smarca2', 'Tbx2', 'Dusp6', 'Hoxb5', 'Itga6', 'Zfp36l1', 'Epas1', 'Nr2f2', 'Myo1c', 'Slco2a1', 'Cytl1', 'Ccnyl1', 'Id3', 'Srsf2', 'Neurl1b', 'Raph1', 'Ctnna1', 'Lims2', 'Rspo3', 'Mllt6', 'Prdm16', 'Nfib', 'Foxp1', 'Amotl2', 'Nras', 'Gngt2', 'Hivep1', 'Cdk17', 'Hspa2', 'Fli1', 'E2f7', 'Smad6', 'Atxn1', 'Sh2b3', 'Actn4', 'Tpd52l1', 'Nrarp', 'Trib2', …	231	1
Mafg	['Padi4', 'Clec5a', 'Fgd4', 'Hnmt', 'Ltf', 'Cebpe', 'Igsf6', 'Inpp4a', 'Pxn', 'Rlim', 'Nhsl2', 'Cd33', '6530402F18Rik', 'Mepce', 'Vasp', 'Olr1', 'Ywhag', 'Apobr', 'Cln3', 'Camp', 'Mafg', 'Itgav', 'Bach1', 'Samd8', 'Pgd', 'Gna13', 'Arap3', 'Snx10', 'Cd276', 'Tmem40', 'Rock2', 'Plbd2', 'Slc3a2', 'Gpd2', 'Pik3cb', 'Jdp2', 'Bag2', 'Lims1', 'G6pdx', 'Phf23', 'Rbm47', 'Tgif1', 'Nt5c2', 'Rasa4', 'Mogat2…	162	1
Rela	['Utp14a', 'Morf4l2', 'Ppp2cb', 'Smu1', 'Cops3', 'Uvrag', 'Exosc3', 'Prkab1', 'Vta1', 'Ccnt1', 'Srpr', 'Mapk1ip1l', 'Mettl6', 'Eaf1', 'Sec11a', 'Med25', 'Rps6ka3', '5430405H02Rik', 'Exoc7', 'Zc3hc1', 'Hspa4', 'Topbp1', 'Nipbl', 'Mocs3', 'Clasrp', 'Prpf19', 'Bms1', 'Nol8', 'Timm23', 'Gtpbp4', 'Ftsj3', 'Acvr1', 'Srsf5', 'Wac', 'Zswim6', 'Med14', 'Stt3a', 'C1qtnf1', 'Eif3k', 'Zfp281', 'St5', 'Creb1'…	131	1
Cebpa	['Csf3r', 'Ski', 'Hvcn1', 'Ubash3b', 'Pid1', 'Adrb2', 'Nfe2l2', 'Rxra', 'Tal1', 'Fam110a', 'Tmem170b', 'Rbm47', 'Nlrp3', 'Ift52', 'Rrbp1', 'Cbx8', 'Mapk14', 'Slc34a2', 'Saa3', 'Harbi1', 'Col27a1', 'Cxxc5', 'Tmem104', 'Zdhhc13', 'Tgfbr1', 'Tbxas1', 'Scoc', 'Rnf149', 'Abca1', 'Stat6', 'Aga', 'Rreb1', 'Arl4c', '2210016F16Rik', 'Nuak1', 'Fcer1g', 'Acer3', 'Dtx4', 'Cd164', 'Spred1', 'Zmiz1', 'Tifa', '…	107	1
Mafb	['C1qb', 'Tmem37', 'P2ry6', 'Cd68', 'Il6ra', 'Ctss', 'Cd33', 'Ccr5', 'Ctsd', 'C1qc', 'C3ar1', 'Maf', 'Hpgd', 'Gna15', 'Slco2b1', 'Rab3il1', 'Slc11a1', 'Csf1r', 'Sirpa', 'Mafb', 'Ptpro', 'Gpr34', 'Rnase4', 'Stab1', 'Ctsz']	25	1
Klf16	['Kctd1', 'Tpbg', 'Bcl11b', 'Nab1', 'Tbc1d10a', 'Apoc1', 'Actn1', 'Itsn1', 'D17Wsu92e', 'Bzw1', 'Bdnf', 'Etv3', 'Foxo1', 'Gas5', 'Bmp7', 'Yes1', 'Xrn2', 'Baiap2', 'Il11', 'Zfp827', 'Camk2n2', 'Rexo2', 'Myo9a', 'Rnf4', 'Igfbp5', 'Ptk7', 'Brd2', 'Eif5a', 'Cx3cl1', 'Klf10', 'Morf4l2', 'Bcl2l11', 'Fam84a', 'Cnot2', 'Nrgn', 'Srf', 'Psrc1', 'Tgif1', 'Impdh2', 'Efna5', 'Eps8l1', 'Bcl3', 'Crispld1', 'Mex…	162	2
Gata3	['Ssbp2', 'Tpm1', 'Pan3', 'Itga6', 'Atxn1', 'Ldb1', 'Snai3', 'Fbxw7', 'Dusp5', 'Zfp36l2', 'Azin1', 'Fst', 'Ccnd2', 'Peli2', 'Aqp3', 'Tox', 'Barx2', 'Rspo3', 'Stat5b', 'Arl4c', 'Foxp1', 'Ikzf2', 'Irx3', 'Hmgn1', 'Jag1', 'Dusp4', 'Wnt7b', 'Kctd1', 'Cirbp', 'Irx1', 'Itga3', 'Ccdc3', 'Btbd11', 'Plk3', 'Rora', 'Slco2a1', 'Sertad2', 'Lmo4', 'Orc4', 'Sumo2', 'Fabp5', 'Sdc1', 'Lef1', 'Ttc9', 'Homer2', 'S…	112	2
Klf5	['Coro1c', 'Ccdc107', 'Pter', 'Cast', 'Iffo2', 'Tnks1bp1', 'Creb3l1', 'Jup', 'Luzp1', 'Chl1', 'Dusp5', 'Morf4l2', 'Abhd2', 'Aldh16a1', 'Anxa8', 'Slc25a20', 'Prelid2', 'Mark2', 'Ctf1', 'Myh9', '1810022K09Rik', 'Stxbp2', 'Acer3', 'Rell1', 'Tuft1', 'Deptor', 'Gtf2f2', 'Myo10', 'Efnb1', 'Dnajc4', 'Pfn1', 'Wee1', 'Baiap2l1', 'Arl4a', 'Lsm12', 'Ces1d', 'Cox6b1', 'Cenpw', 'Ephb3', 'Mgst3', 'Plekhh3', 'C…	1371	3
Fosl1	['Tac1', 'Lmna', 'Lysmd3', 'Srxn1', 'Arih1', 'Arrdc4', 'Bdnf', 'Tpm1', 'Slc25a3', 'Aldoa', 'Phlda2', 'Samd4b', 'Cldn4', 'Capn6', 'Sertad2', 'Vps37a', 'Ecm1', 'Prdx1', 'Creb5', 'Rin1', 'Sphk1', 'Sqstm1', 'Met', 'Ptp4a1', 'Cd63', 'Klhl21', 'Dmkn', 'Eif5a', 'Bag3', 'Sprr1a', 'Fam83g', 'Trib1', 'F3', 'Capns1', 'Usp36', 'Perp', 'Rab34', 'Gja1', 'Crabp1', 'Mrps18b', 'Ubap2l', 'Stk19', 'Atf3', 'Ankrd22'…	1149	3
Atf4	['Dusp1', 'Ube2h', 'Tead1', 'Gla', 'Tpm4', 'Spred2', 'Tmem39a', 'Vps37b', 'Arg2', 'Zfp593', 'Rcan1', 'Lrrc8a', 'Usp36', 'Ell2', 'Chpf', 'Fosb', 'Ctu2', 'Wdr82', 'Trip6', 'Gas5', 'Filip1l', 'Epha2', 'Pdlim3', 'Nup98', 'Gem', 'Maff', 'Nr4a2', 'Dnttip1', 'Myh10', 'Btg2', 'Trap1', 'Ppp1r15a', 'Calm2', 'Fbxo33', 'Areg', 'Fn1', 'Srpr', 'Ddx49', 'S1pr2', 'Cope', 'Ube2b', 'Magoh', 'Nek1', 'Rnps1', 'Sik1'…	1024	3
Xbp1	['Braf', 'Pdia5', 'Tmem39a', 'Napa', 'Sec16b', 'Mthfr', 'Gmppb', 'Relb', 'Tmem214', 'Scfd1', 'Ssr1', 'Uso1', 'Tmed2', 'Ssr4', 'Srpr', 'Igf2r', 'Sec63', 'Morf4l2', 'Tmem59l', 'Lrrc8a', 'Erlec1', 'Stx5a', 'Arcn1', 'Tm9sf3', 'Maff', 'Sar1a', 'Aff4', 'Arf1', 'Tead1', 'Cand1', 'Dhx40', 'Gem', 'Tmem86a', 'Eif4g1', 'Kdelr3', 'Zfp9', 'Ubn1', 'Cd164', 'Pld3', 'Arl4d', 'Sfxn2', 'Hexim1', 'Chpf', 'Sumf1', '…	995	3
Fosl2	['Dusp1', 'Fosb', 'Ube2b', 'Gla', 'Vps37b', 'Dusp5', 'Azin1', 'Ell2', 'Errfi1', 'Heg1', 'Jdp2', 'Atf3', 'Gas5', 'Calm1', 'Jun', 'Creb5', 'Fam76a', 'Ccnyl1', 'Rbm3', 'Picalm', 'Insig1', 'Arg2', 'Rap1b', 'Impdh2', 'Dok2', 'Dkk2', 'Ing3', 'Tpm4', 'Maff', 'Gabarap', 'Avpi1', 'Hoxa10', 'Ccl4', 'Tra2a', 'Igfbp3', 'Zeb1', 'Klf6', 'Hivep1', 'Aldh1a2', 'Cds1', 'Cdk14', 'Nr4a2', 'Mafg', 'Bhlhe40', 'Sox11',…	907	3
Junb	['Dusp1', 'Nfatc1', 'Fosb', 'Ube2b', 'Gla', 'Vps37b', 'Dusp5', 'Azin1', 'Filip1l', 'Jdp2', 'Pias1', 'Cdc42se1', 'Atf3', 'Gas5', 'Svep1', 'Jun', 'Foxp2', 'Irf2', 'Golph3', 'Ccnyl1', 'Gtf2f1', 'Peli2', 'Rbm3', 'Arg2', 'Tmem39a', 'Rap1b', 'Impdh2', 'Relb', 'Rbp4', 'Dkk2', 'Brd4', 'Ing3', 'Tpm4', 'S1pr2', 'Atxn1', 'Gabarap', 'Thoc1', 'Ccl4', 'Tra2a', 'Igfbp3', 'Taf4b', 'Klf6', 'Aldh1a2', 'Smarca2', '…	863	3
Myc	['Hsph1', 'Rapsn', 'Bcl7c', 'Srm', 'Slc39a14', 'Ppp1r14b', 'Pdpn', 'Chrnb1', 'Ubap2l', 'Tac1', 'Polr3d', 'Ccdc6', 'Trip6', 'Hnrnpa1', 'Prkab2', 'Wee1', 'Sox11', 'Taf4b', 'Zbtb11', 'Nup54', 'Calr', 'Pprc1', 'Ptpn2', 'Rps19', 'Zfc3h1', 'Rps6', 'Etf1', 'Rpl7a', 'Rpl4', 'Rpl12', 'Nmd3', 'Rps15a', 'Rps28', 'Npm1', 'Rbbp7', 'Rpl23a', 'Nop14', 'Tiparp', 'Nop58', 'Myc', 'Slc7a6', 'Smo', 'Clp1', 'Ints6', …	858	3
Creb3l1	['Stx5a', 'Morf4l2', 'Scfd1', 'Stt3a', 'Tm9sf3', 'Ssr4', 'Insig1', 'Pitx2', 'Gla', 'Lrrc59', 'Kdelr3', 'Gabarap', 'Dpagt1', 'Uap1', 'Nans', 'Hyou1', 'Sfrp4', 'Sec16b', 'Slc35e1', 'Calu', 'Cldn3', 'Ppib', 'Txndc11', 'Cnpy2', 'Mmp14', 'Dact1', 'Ssr1', 'Mlec', 'Ero1l', 'Gmppb', 'Slc35b2', 'Egr1', 'Erlec1', 'Fkbp14', 'Adam12', 'Ehbp1', 'Golim4', 'Dad1', 'Dnajc3', 'Slc50a1', 'Sec61b', 'Slc44a4', 'Cblb…	853	3
Fos	['Sirt1', 'Braf', 'Dusp1', 'Fosb', 'Gla', 'Dusp5', 'Azin1', 'Ell2', 'Filip1l', 'Atf3', 'Gas5', 'Calm1', 'Svep1', 'Jun', 'Homer2', 'Foxp2', 'Golph3', 'Peli2', 'Kctd1', 'Insig1', 'Arg2', 'Tmem39a', 'Hsp90ab1', 'Rbp4', 'Dkk2', 'Ccl27a', 'Tpm4', 'Atp1b1', 'Itga6', 'Maff', 'Ppp2r2d', 'Gabarap', 'Avpi1', 'Hoxa10', 'Ccl4', 'Tra2a', 'Slco2a1', 'Igfbp3', 'Sh3gl1', 'Klf6', 'Aldh1a2', 'Smarca2', 'Nr4a2', 'B…	827	3
Bhlhe41	['Tmem55b', 'Neurl2', 'Kat5', 'Atp6v0b', 'Gnptg', 'Cln3', 'Rragc', 'Orai2', 'Commd9', 'Arhgap12', 'Slc35b2', 'Mtdh', 'Cd164', 'Usp31', 'Slc38a7', 'March8', 'Hps3', 'Dolk', 'Dctn4', 'Bhlhe41', 'Adam10', 'Mafg', 'Pld3', 'Dnmt3a', 'Rab3il1', 'Lamp1', 'Sik3', 'Slc25a33', 'Bmp2k', 'Dip2b', 'Tef', 'Rc3h2', 'Gpr146', 'Extl2', 'Gns', 'Wls', 'Ctsd', '0610040J01Rik', 'Acap2', 'Tcn2', 'Aars', 'Dhdds', 'Prkc…	820	3
Jun	['Itga6', 'Nfatc1', 'Egr1', 'Pkdcc', 'Nr4a2', 'Ptges3', 'Tpm1', 'Gadd45b', 'Sgk1', 'Fst', 'Klf2', 'Llgl2', 'Ubap2l', 'Nbeal1', 'Rnf19b', 'Plxna2', 'Srsf2', 'Sirt1', 'Amotl2', 'Gnaq', 'Itga3', 'Fnip2', 'Zfp36l2', 'Igfbp3', 'Actg1', 'Zfp503', 'Zfp36l1', 'Atxn1', 'Ccnd2', 'Prdm16', 'Ppp3ca', 'Dstn', 'Fosb', 'Ctnna1', 'Wnt2', 'Cdkn2aip', 'Slco2a1', 'Peli2', 'Aldoa', 'Foxp1', 'Plk3', 'Glg1', 'Fn1', 'T…	794	3
Jund	['Fosb', 'Vps37b', 'Jun', 'Cdc42se1', 'Dusp1', 'Ube2h', 'Ube2b', 'Tac1', 'Nfatc1', 'Llgl2', 'Ddx5', 'Ppp2r2d', 'Arhgap26', 'Tpm1', 'Atf3', 'Lbh', 'Rbp4', 'Sirt1', 'Nfkbiz', 'Tmem39a', 'Dkk2', 'Cdc14b', 'Gas5', 'Baz1b', 'Rab11b', 'Ddit3', 'Dusp5', 'Homer2', 'Insig1', 'Srf', 'Gla', 'Btg1', 'Polr2a', 'Filip1l', 'Zfp36l2', 'Ccl27a', 'Rps29', 'Slc43a1', 'Relb', 'Azin1', 'Thra', 'Coq10b', 'Sept2', 'Itp…	778	3
Hnf1b	['Fxyd2', 'Kifc3', 'Cldn10', 'Pcbd1', 'Akr1c19', 'Atp1b1', 'Igsf5', 'Spp1', 'Rbm47', 'Cisd1', 'Prr15l', 'Hoxa10', 'Baiap2l2', 'Adcy6', 'Slc4a2', 'Slc40a1', 'Plekhg3', 'Scml4', 'Hnf1b', 'Stk16', 'Traf4', 'Crb3', 'Egr1', 'Grb7', 'Smtnl2', 'Cdc42ep1', 'AA986860', 'Ppp1r1b', 'Sema3b', 'Tns3', 'Myo6', 'Plxna2', 'Anpep', 'Lad1', 'Ocln', 'Prr5', 'E130317F20Rik', 'Agpat2', 'Ccnd1', 'Rab3ip', 'Stard10', '…	734	3
Atf3	['Jun', 'Atf3', 'Fosb', 'Dusp1', 'Ccl27a', 'Fos', 'Lhx2', 'Klf6', 'Ccnl1', 'Dmkn', 'Emp1', 'Atf4', 'Cd109', 'Gm973', 'Serpinb8', 'Kcnk2', 'Fam25c', 'Egr1', 'Serpinb2', 'Rarg', 'Barx2', 'Klf4', 'Itpr3', 'Peli2', 'Trib1', 'Ahnak', 'Pmaip1', 'Maff', 'Lmna', 'Rin1', 'Fam83g', 'Perp', 'Arrdc4', 'Dusp22', 'Fchsd1', 'Ctnna1', 'Anxa2', 'Sbsn', 'Btbd11', 'Osr2', 'Capns1', 'Plec', 'Fam83h', 'Tacstd2', 'Kct…	723	3
Sox10	['Cmtm5', 'Apod', 'Tmeff1', 'Agpat4', 'Edil3', 'Sh3gl3', 'Chadl', 'Gjb1', 'Sept4', 'Aplp1', 'Efnb3', 'Ppp2r2b', 'Phactr1', 'Cnp', 'Col9a3', 'Atp1a2', 'Arrdc3', 'Ywhaq', 'Plp1', 'Rgs7bp', 'Enpp2', 'Sytl2', 'Aif1l', 'Apln', 'Dusp15', 'Mbnl2', 'Cdyl', 'Clcn3', 'Trf', 'Acsbg1', 'Smad7', 'Dab1', 'Rhobtb3', 'Eps15', 'Rtkn', 'Cldn10', 'Usp54', 'Camk2a', 'Sox2', 'Kif1b', 'Pcyt1b', 'Cpox', 'BC052040', 'S1…	714	3
Mitf	['Tmem55b', 'Dvl2', 'Neurl2', 'Picalm', 'Mfsd1', 'Atp6v0b', 'Gnptg', 'Nptn', 'Mcoln1', 'Cln3', 'Uvrag', 'Rragc', 'Arhgap12', 'Slc35b2', 'Snx8', 'Slc38a7', 'Ptprs', 'Hps3', 'Fnip1', 'Pld3', 'Zfyve26', 'Lin54', 'Dnmt3a', 'Irs1', 'Rab3il1', 'Lamp1', 'Bmp2k', 'Flrt2', 'Dip2b', 'Khk', 'Tef', 'Zfp217', 'Batf3', 'Tmeff2', 'Crispld1', 'Extl2', 'Gns', 'Wls', 'Ctsd', 'Mfhas1', '0610040J01Rik', 'Trp53inp1',…	697	3
Esrra	['Acss2', 'Hspbp1', 'Dopey2', 'Esrra', 'Ap3d1', 'Pgrmc2', 'Ephb3', 'Slc25a1', 'Cib1', 'Gabarapl2', 'Ppm1j', 'Slc4a7', 'Reep6', 'Lpcat3', 'Pnkd', 'Ptrh1', 'Zfp771', 'Aldh6a1', 'Afg3l2', 'Crot', 'Rrbp1', 'Lars2', 'Aldh16a1', 'Cyhr1', 'Neurl1b', 'Pnpla2', 'Cds1', 'Sesn3', 'Maff', 'Abhd2', 'Arhgap26', 'Rab11fip1', 'Tesk2', 'Tkt', 'Llgl2', 'Idh1', 'Tmub2', 'Gnpnat1', 'Mepce', 'Impad1', 'Fmn1', 'Xpr1',…	681	3
Fosb	['Sirt1', 'Dusp1', 'Nfatc1', 'Fosb', 'Gla', 'Dusp5', 'Azin1', 'Ell2', 'Errfi1', 'Filip1l', 'Jdp2', 'Atf3', 'Gas5', 'Jun', 'Homer2', 'Creb5', 'Ccnyl1', 'Peli2', 'Gars', 'Insig1', 'Arg2', 'Tmem39a', 'Rap1b', 'Ppp2ca', 'Rbp4', 'Dkk2', 'Atl2', 'Ccl27a', 'S1pr2', 'Atxn1', 'Maff', 'Gabarap', 'Areg', 'Hoxa10', 'Ccl4', 'Tra2a', 'Aig1', 'Runx1', 'Slco2a1', 'Igfbp3', 'Rpl23', 'Taf4b', 'Zeb1', 'Klf6', 'Hive…	598	3
Nr2f6	['Hnf1b', 'Sult1a1', 'Prr15l', 'Hpn', 'Lgals4', 'Cela1', 'Krt19', 'Nr2f6', 'Ppp1r1b', 'Fam13a', 'Slc44a4', 'Prrg2', 'Tcea3', 'Cldn8', 'D630039A03Rik', 'Gmppa', 'Rpn1', 'Aldob', 'Ccdc90b', 'Spr', 'Bak1', 'Zfp768', 'Lman1', 'Dcbld1', 'Akap1', 'Hoxa10', 'Ptpn9', 'H1f0', 'Arhgef10l', 'Slc9a1', 'Shroom3', 'Tmem41b', 'Efnb1', 'Qser1', 'C2cd2', 'Mrpl42', 'Dst', 'Ehf', 'Zfp523', 'Ddx27', 'Tmem218', 'Acvr…	591	3
Tcf7l2	['Gtpbp2', '2200002D01Rik', 'Sdcbp2', 'Heph', 'Tmed10', 'Espn', 'Slc20a1', 'Plec', 'Rtn4', 'Itpkc', 'Anxa1', 'Junb', 'Bag3', 'Pkp3', 'Tac1', 'Lgals3', 'Crk', 'Epha2', 'Slc2a1', 'Ipo5', 'Ssfa2', 'Abhd2', 'Sdc4', 'Ctnnal1', 'Psmd11', 'Ap1s1', 'Atp1b1', 'Mafg', 'Dusp7', 'Gtf2ird1', 'F3', 'Hcfc1r1', 'Lamb3', 'Kdm6b', 'Mapk6', 'Cttnbp2nl', 'Anxa5', '1110051M20Rik', 'Nr1d1', 'Fam135a', 'Fosl2', 'Clip4'…	535	3
Dbp	['Per3', 'Ak4', 'Tubb2b', 'Unc5c', 'Trak1', 'Ddx17', 'Brca1', 'Rbp4', 'Hhip', 'Chpf', 'Mllt11', 'Ankrd40', 'Myh10', 'Pitx2', 'Hlf', 'Prex2', 'Sema6d', 'Pycr1', 'Meis1', 'Cdc14b', 'Col12a1', 'Tef', 'Ubr4', 'Cdc42bpa', 'Crebzf', 'Ntm', 'Gtf3c1', 'Hnrnph1', 'Dnajb12', 'Ivd', 'Mapk1ip1', 'Sacm1l', 'Trp53inp2', 'Hmg20a', 'Zfp516', 'Lars2', 'Ndst1', 'Slc25a23', 'Phactr1', 'Psd3', 'Zfp644', 'D17Wsu92e',…	477	3
Rxra	['Plcb3', 'Sema4g', 'Nr2f6', 'Mllt10', 'Stard10', 'Zbtb7b', 'Zfp628', 'Sec24c', 'Dab2ip', 'Nr1d1', 'Zdhhc5', 'Mafb', 'Parp6', 'Adamtsl5', 'Lhx2', 'Prkcd', 'Pepd', 'Sytl1', 'Syt7', 'Crabp1', 'Col8a2', 'Lefty1', 'Gpt', 'Pth1r', 'Plec', 'Plxna2', 'Zmiz1', 'Ckmt1', 'Plekha7', 'Vdr', 'Uchl4', 'Pkdcc', 'Tomm40l', 'Crlf1', 'Rbfox2', 'Ankrd9', 'Etv3', 'Tlcd2', 'Rreb1', 'Thra', 'Acsl5', 'Rhod', 'Mark3', '…	470	3
Klf15	['Lin52', 'Aldh6a1', 'Ptk7', 'Cadm1', 'Ap2a1', 'Wasf1', 'Sesn3', 'Slc2a4', 'Hand2', 'Ugp2', 'Tsen34', 'Nbea', 'Gtf2a1', 'Gprc5c', 'Six5', 'Fgd1', 'Hspa2', 'Prickle1', 'Sgk1', 'Sorbs1', 'Carhsp1', 'Apoc1', 'Mut', 'Kank2', 'Pja1', 'Ero1lb', 'Ippk', 'Echdc3', 'Ust', 'Prkra', 'Rprd1a', 'Snai1', 'Col13a1', 'Tom1', 'Arhgef19', 'Exoc6b', 'Tecr', 'Dact3', 'Aplp2', 'Slc12a4', 'Asf1a', 'Paip2b', 'Hey1', '3…	444	3
Nr1h3	['C4b', 'Nr1h3', 'Apoa1', 'Fabp1', 'Gsta3', 'Vtn', 'Dapk1', 'C2', 'H2-Q10', 'Cd1d1', 'Nr2f2', 'Igf1', 'Tmem53', 'Cp', 'Apoc1', 'Aldh1a1', 'Orm1', 'Armcx2', 'Enpep', 'Blvrb', 'Csrp2', 'Gjb2', 'Apoa2', 'Ass1', 'Ces1d', 'Atf7', 'Dand5', 'Slc38a6', 'Crot', 'Spice1', 'C8g', 'Kcnj8', 'Mttp', 'Slc25a47', 'Anpep', 'Cxcl13', 'Adal', 'Txndc12', 'Il18bp', 'Pipox', 'Fggy', 'Adh1', 'Zfp770', 'Hsd11b1', 'Ap1g1…	417	3
Creb3	['Stx5a', 'Dhdds', 'Scfd1', '4933434E20Rik', 'Tm9sf3', 'Ssr4', 'Rreb1', 'Tspan13', 'Btbd9', 'Dpagt1', 'Slc35a5', 'Aftph', 'Ptov1', 'Pag1', 'Ddx3x', 'Mcoln1', 'Ppib', 'Dnajc25', 'Cd164', 'Atp6v0b', 'Tmed10', 'Tbcel', 'Cnpy2', 'Snx2', 'Ssr1', 'Tmem165', 'Ncstn', 'Asb3', 'Erlec1', 'Gnptg', 'Nsd1', 'Armcx1', 'Slc35b1', 'Dad1', 'Dnajc3', 'Xpot', 'Slc50a1', 'Mafg', 'Slc31a2', 'Commd8', 'Tpp2', 'Arhgap1…	416	3
Srebf1	['Dolpp1', 'Eif2ak3', 'Camta1', 'Etv5', 'Pin1', 'Katnb1', 'Mvk', 'Tysnd1', 'Rps6ka5', 'Fam46b', 'Pgp', 'Txndc16', 'Mxd4', 'Sesn3', 'Nubp2', 'Atp5g1', 'Fdft1', 'Dnm2', 'Aldh4a1', 'Aldh6a1', 'Recql', 'Derl3', 'Dcaf11', 'Sort1', 'Kdm4a', 'Tbccd1', 'Fdps', 'Ppp6r3', 'Vcp', 'Wbp1', 'Os9', 'Syvn1', 'Mvd', 'Dbp', '5430416N02Rik', 'Tecr', 'Chtf18', 'Ppp2r5a', 'Rabl3', 'Hsd17b12', 'Ficd', 'Megf9', 'Cat', …	409	3
Mafk	['Ddx3x', 'Midn', 'Srxn1', 'Rcan1', 'Sqstm1', 'Sytl2', 'Tsc22d2', 'Tbx3', 'Txnrd1', 'Zfand5', 'Ubc', 'Ctnnb1', 'Zfand2a', 'Actn4', 'Cast', 'Gprc5a', 'Lrrfip2', 'Ubxn8', 'Dcaf10', 'Pdk4', 'Slc25a25', 'Taf4b', 'Rela', 'Bhlhe40', 'Ing5', 'Itpkc', 'Hmga1', 'Map2k3', 'Mafg', 'Gal', 'Flnc', 'Mapk6', 'Ppp2ca', 'Plec', 'Blmh', 'Arap3', 'Slc2a1', 'Hook2', 'Junb', 'Gata2', 'Rtn4', 'Prdm1', 'Prr7', 'Srsf11'…	398	3
Ppard	['Rreb1', 'Nostrin', 'Slc30a1', '2610528J11Rik', 'Rbm47', 'Lgals4', 'Heph', 'Hsd17b11', 'Fads2', 'Gipc2', 'Ncald', 'Ank3', 'Zfp46', 'Ctnnd1', 'Krt23', 'Map4k3', 'S100g', 'Hsd11b2', 'Tsc22d2', 'Pex16', 'Fabp4', 'Elmod2', 'Caskin2', 'Grb7', 'Dctn4', 'Gcc2', 'Amn', 'C1qtnf6', 'Arg2', 'Slc40a1', 'Nipal1', 'Cxcr2', 'Prkg2', 'H2-K2', 'Spint2', 'Ethe1', 'Src', 'Cldn12', 'Klc4', 'Gchfr', 'Sap30l', 'Paqr4…	395	3
Nfatc4	['Prrx1', 'Itga5', 'Dkk2', 'Ccdc80', 'Tgfb3', 'C1qtnf7', 'Twist1', 'Svep1', 'Lama4', 'Dlg2', 'Dnm3os', 'Gli3', 'Nfatc4', 'Il11ra1', 'Nupr1', 'Pbx1', 'Tbx15', 'Kcne4', 'Smarcd3', 'Hic1', 'Enpp2', 'Fkbp10', 'Cald1', 'Abca8a', 'Cdh11', 'Pcolce2', 'Sorbs2', 'Lpl', 'Hoxb2', 'Mmp3', 'Nr2f2', 'Fkbp9', 'Thbs2', 'Eln', 'Tbx18', 'Mgp', 'Fn1', 'Tpm2', 'Sspn', 'AW551984', 'Fgfr1', 'Rftn2', 'Mustn1', 'Olfml3'…	392	3
Maff	['Dusp1', 'Tmem39a', 'BC048403', 'Arg2', 'Rcan1', 'Rps29', 'Dusp8', 'Fosb', 'Golph3', 'Trip6', 'Nup98', 'Maff', 'Suv39h2', 'Mxd1', 'Josd1', 'Nr4a2', 'Cyr61', 'Nfatc2', 'Relb', 'Srpr', 'D17Wsu92e', 'Magoh', 'Bcl6', 'Nek1', 'Cdk2ap2', 'Lrrc59', 'Trib1', 'Arl5b', 'Cltb', 'Rbms2', 'Taf4b', 'Jun', 'Ddx3x', 'Ptrh1', 'Zfand5', 'Myl6', 'Hivep1', 'Agpat4', 'Egr1', 'Gprc5a', 'Ahr', 'Eif5a', 'Xrn2', 'Ranbp6…	361	3
Grhl1	['Ikzf2', 'Ralbp1', 'Arhgef19', 'Rab25', 'Eps8l2', 'Jup', 'Aff4', 'Epha1', 'Tmem79', 'Cldn4', 'Klc3', 'Tnks1bp1', 'Elovl1', 'Csnk1a1', 'Stim1', 'Atp2b4', 'Fam83h', 'Cdkn2b', 'Tacstd2', 'Itm2b', 'Endou', 'Bcam', 'Pkp3', 'Hmgn3', 'Gdpd3', 'Qars', 'Cds1', 'Arhgap32', 'Egln3', 'Fam25c', 'Srpk2', 'Tmem154', 'Dcaf10', 'Capsl', 'Gramd1c', 'Il1rn', 'Me1', 'Odf2l', 'Kctd1', 'Sipa1l3', 'Rcan1', 'Plxna2', '…	346	3
Ehf	['Slc39a9', 'Cog3', 'Sec31a', 'Tbrg1', 'Zkscan1', 'Pick1', 'Uggt1', 'Appl2', 'Dpy30', 'Vps53', 'Uqcrq', 'Ppp1r11', 'Crb3', 'Ttf1', 'Cpeb4', 'Spata2', 'Suds3', 'Rreb1', 'Romo1', 'Slc25a17', 'Pmm2', 'Pgap3', 'Mark2', 'Cln3', 'Arfip1', 'Usp6nl', 'Tatdn1', 'Acot8', 'Edem3', 'Pfn1', 'Rnf6', 'Nfs1', 'Pabpn1', 'Cox15', 'Egr1', 'Wipf2', 'Atp5j', 'Chmp2a', 'Dennd1b', 'Atp5a1', 'Atp13a1', 'Net1', 'Hps1', '…	285	3
Nr2f2	['Smarcd3', 'Svep1', 'Prrx1', 'Fermt2', 'Eln', 'Epas1', 'Mylip', 'Ccnyl1', 'Tpm1', 'Ace', 'Ccdc80', 'Prdm16', 'Wnt2', 'C1qtnf1', 'Klf2', 'Prelp', 'Prkg1', 'Hic1', 'Aldoa', 'Nbeal1', 'Hoxa10', 'Nfib', 'Hoxa4', 'Tmem150a', 'Slco3a1', 'Per3', 'Ntf3', 'Zfp503', 'Srf', 'Fbn1', 'Ctnna1', 'Nrarp', 'Lims2', 'Igfbp4', 'Amotl2', 'Tbx2', 'Peli2', 'Fn1', 'Cdkn2aip', 'Brd3', 'Ccnd2', 'Mdk', 'Mecom', 'Tcea3', …	269	3
Elf3	['Bag6', 'Slc39a9', 'Fibp', 'Cog3', 'Zkscan1', 'Lypla2', 'Pick1', 'Uggt1', 'Eif3i', 'Appl2', 'Dpy30', 'Ubl5', 'Uqcrq', 'Crb3', 'Cpeb4', 'Spata2', 'Suds3', 'Romo1', 'Slc25a17', 'Pmm2', 'Tsg101', 'Pgap3', 'Dalrd3', 'Mark2', 'Usp6nl', 'Tatdn1', 'Acot8', 'Ndufb7', 'Arf1', 'Taok3', 'Erh', 'Cox15', 'Egr1', 'Wipf2', 'Atp5j', 'Chmp2a', 'Micall2', 'Fam96a', 'Atp5a1', 'Net1', 'Rnf121', 'Hps1', 'Esd', 'Cox5…	257	3
Tef	['Unc5c', 'Tef', 'Casc3', 'Dnajb12', 'Armcx5', 'Ddx59', 'Wwox', 'Gtf3c5', 'Vma21', 'Fkbpl', 'Pou6f1', 'Rft1', 'Itfg2', 'Zfp503', 'Metap1d', 'Atf2', 'Zfp462', 'Spsb4', 'Cd59b', 'Arhgap12', 'Nudt18', 'Per1', 'Glg1', 'Als2', 'Tmem33', 'Gmfb', 'Ppp2cb', 'Fbxl3', 'Snx14', 'Pi4kb', 'Rtn4', 'Per3', 'Rev1', 'Nr1d1', 'Akt3', 'Ccdc47', 'Nr1d2', 'Fam126b', 'Plcb1', 'Zdhhc5', 'Zdhhc14', 'Dennd4a', 'Rab11fip2…	213	3
Sox11	['Marcks', 'Tbx2', 'Phlpp1', 'Ccdc88a', 'Map4k4', 'Cnp', 'Cdk14', 'Ttc9', 'Meis1', 'Tmeff1', 'Smad6', 'Dpysl5', 'Hoxa5', 'Pdp1', 'Spry4', 'Ace', 'Sytl2', 'Samd4', 'Smad7', 'Slc6a9', 'Mat2a', 'Mpped2', 'Ccnt2', 'Trib2', 'Ccnyl1', 'Dnaic1', 'Fermt2', 'Srgap1', 'Klf9', 'Pde1c', 'Gkap1', 'Clmn', 'Sema6d', 'Meg3', 'Kit', 'Amph', 'Cdk17', 'Prickle1', 'Cacnb1', 'Hoxc10', 'Homer1', 'Hoxb5', 'Meis2', 'Usp…	212	3
Pparg	['Cd36', 'Krt19', 'Papss2', 'Sult1a1', 'Eepd1', 'Krt23', 'Fabp4', 'Cyp4f16', 'Mall', 'Cldn7', 'Rbp7', 'Gda', 'Acsf2', 'Eno3', 'Mkl2', 'Mecom', 'Gdf15', 'Etl4', 'Lmo7', 'Tmcc3', 'Lin54', '1810011O10Rik', 'Ech1', 'Sdcbp2', 'Sh3bgrl2', 'Cldn15', 'Nr2f2', 'Slc45a3', 'Klf10', 'Lipe', 'Espn', 'Lasp1', 'Ptrf', 'Pnpla2', 'Fbp2', 'Mgll', 'Car4', 'Prkar2a', 'Tmem64', 'Socs2', 'Tspan12', 'Mgst1', 'Inpp5j', …	208	3
Hoxc6	['Fosb', 'Svep1', 'Nr4a2', 'Egr1', 'Srf', 'Penk', 'Btbd11', 'Kdm6a', 'Fst', 'Adam12', 'Rspo3', 'Id4', 'Cbx8', 'Peli2', 'Sh3gl1', 'Atf3', 'Reps2', 'Pkdcc', 'Hivep1', 'Boc', 'Fzd2', 'Aldh1a3', 'Kctd15', 'Nova1', 'Klf4', 'Jag1', 'Igfbp3', 'Pcsk5', 'Capn1', 'Hspb8', 'Zfp36l2', 'Fos', 'Slc43a1', 'Chst11', 'Phlda2', 'Fn1', 'Cyr61', 'Irx3', 'Ccdc3', 'Tsc22d1', 'Fbn1', 'Mid1ip1', 'Lhx2', 'Zfp503', 'Cldn1…	177	3
Egr2	['Thbs1', 'Bdnf', 'Zswim4', 'Slc43a1', 'Gem', 'Ccdc6', 'Egr1', 'Angptl4', 'Col1a1', 'Igfbp5', 'Stat5a', 'Nr4a3', 'Grasp', 'Flnc', 'Wnt6', 'Fosb', 'Srf', 'Cacnb3', 'Nfia', 'Hoxc9', 'Pdgfrb', 'Des', 'Ndrg2', 'Ssr3', 'Bmp4', 'Hoxc6', 'Dlg4', 'Spry2', 'Ppp1r10', 'Fkbp10', 'Spred1', 'Prr7', 'Aff4', 'Nbl1', 'Flna', 'Tcf7l2', 'Kdm6b', 'Crlf1', 'Igf2', 'Lmna', 'Trip10', 'Tob2', 'Zfp36l1', 'Cnn1', 'Bgn', …	169	3
Msx1	['Prrx1', 'Svep1', 'Helz', 'Ccnyl1', 'Epas1', 'Klf2', 'Itga6', 'Per1', 'Fermt2', 'Egr1', 'Sntb2', 'Ccnd2', 'Nr4a1', 'Lims2', 'Igfbp3', 'Klf7', 'Rspo3', 'Ace', 'Prdm16', 'Penk', 'Acvr1', 'Atoh8', 'Wdr1', 'Amotl2', 'Ctnna1', 'Tspan13', 'Nrp2', 'Itga1', 'Nrarp', 'Neurl1b', 'E2f7', 'Ccdc80', 'Eln', 'Loxl3', 'Ddit4', 'Smad6', 'Gli3', 'Irf1', 'Ntf3', 'Mycn', 'Nbeal1', 'Morc4', 'Ctnnb1', 'Cdk14', 'Klf4'…	164	3
Hoxb2	['Prrx1', 'Hoxa5', 'Ccnyl1', 'Sntb2', 'Mat2a', 'Spry4', 'Tbx2', 'Socs2', 'Prkg1', 'Eln', 'Ace', 'Atxn1', 'Efna1', 'Kdm6a', 'Maff', 'Fst', 'Rspo3', 'Pcsk5', 'Srf', 'Ntf3', 'Cdkn1b', 'Ttc9', 'Hoxb5', 'Neurl1b', 'Igfbp3', 'Slco2a1', 'Aqp3', 'Nrarp', 'Sdc1', 'Angel1', 'Dkk2', 'Hivep2', 'Kctd15', 'Col13a1', 'Jag1', 'Pcgf2', 'Cnnm3', 'Rcor3', 'Hoxb2', 'Lmo1', 'Col12a1', 'Plcd1', 'Fchsd1', 'Ephb4', 'Gja…	162	3
Foxc1	['Nfatc1', 'Comp', 'Cyr61', 'Sfxn3', 'Net1', 'Pdlim3', 'Slc39a8', 'Rnf144b', 'Tmem45a', 'Foxc1', 'Igfbp3', 'Hspb1', 'Bmp4', 'Vangl1', 'Tgfb2', 'Gcnt2', 'Hoxb2', 'Slc5a6', 'Lpp', 'Irx3', 'Pcp4l1', 'Neurl4', 'Cck', '1600020E01Rik', 'Slc38a3', 'Dusp14', 'Vat1', 'Fam129b', 'Spock2', 'Ttc30b', 'H19', 'Cgnl1', 'Kank1', 'Col8a2', 'Ptn', 'Ptpn14', 'Mfhas1', 'Igf2', 'Ctgf', 'Smarca2', 'Slc39a10', 'Inhbb',…	157	3
Srf	['Bag6', 'Cog3', 'Eaf1', 'Gnai3', 'Trip12', 'Dlst', 'Csnk1g1', 'Sec24a', 'Uggt1', 'Vps37c', 'Acvr2a', 'Zfp655', 'Dalrd3', 'Cited2', 'Prkcsh', 'Bag4', 'Zbtb11', 'Zfp316', 'Zdhhc5', 'Taf13', 'Copa', 'U2af2', 'Ankhd1', 'Acin1', 'Mrpl3', 'Eif2a', 'Ube2f', 'Prelid1', 'Prrg2', 'Znhit1', 'Prpf19', 'Esd', 'Morn1', 'Kctd5', 'Nrd1', 'Dync2h1', 'Uba5', 'Ahdc1', 'Katna1', 'Zfp64', 'Oasl1', 'Mbd1', 'Stk40', '…	148	3
Hlf	['Per3', 'Fbxo3', 'Cdk6', 'Meis1', 'Ncor2', 'Zfp322a', 'Oscp1', 'Rgs18', 'Gcnt2', 'Dhx37', 'Ube2cbp', 'Pank1', 'Map3k7', 'Tmem201', 'Rpp14', 'Armcx6', '1700018L02Rik', 'Irf2bp1', 'Ak4', 'Pck2', 'Peli2', 'Yif1b', '1700112E06Rik', 'Srebf2', 'Ndst1', 'Chst11', 'Mycn', 'Slc22a21', 'Smarca2', 'Dnmt3b', 'Six5', 'Lrrc14', 'Il12a', 'Xpnpep3', 'Gabarapl1', 'Ssbp2', 'Smyd2', 'Hlf', 'Homez', 'Slco3a1', 'Dnl…	143	3
Hoxb5	['Hoxb7', 'Trim8', 'Ace', 'Tbx2', 'Slco2a1', 'Hoxa5', 'Eln', 'Pan3', 'Kit', 'Hoxb5', 'Patz1', 'Dhrs3', 'Hoxb6', 'Col13a1', 'Meis2', 'Meis1', 'Adamts10', 'Sox11', 'Neurl1b', 'Vgll3', 'Pcsk5', 'Lrp4', 'Plvap', 'Klf4', 'Arl15', 'Hoxa4', 'Vegfa', 'Kcnk3', 'Slc29a1', 'Zfp503', 'Amotl2', 'Smurf2', 'Limch1', 'Ephb4', 'Efnb2', 'Hhip', 'Gja4', 'Ada', 'Irx3', 'Tmem150a', 'Cdh13', 'Nrp2', 'Vwf', 'Hoxb2', 'D…	137	3
Hoxa5	['Nfatc1', 'Penk', 'Hoxb7', 'Ace', 'Igfbp3', 'Cadm1', 'Srsf2', 'Atxn1', 'Smarca2', 'Plxna2', 'Klf7', 'Ccnyl1', 'Tbx2', 'Hoxa5', 'Foxp1', 'Baiap2', 'Slco2a1', 'Eln', '1190002N15Rik', 'Kit', 'Hoxb6', 'Hoxa7', '2700060E02Rik', 'Hoxb5', 'Dhrs3', 'Pan3', 'Plvap', 'Ehd1', 'Rspo3', 'Klf3', 'Igfbp4', 'Hoxa4', 'Adamts10', 'Col13a1', 'Cnnm3', 'Slit2', 'Tob1', 'Meis1', 'Per3', 'Klf4', 'Crispld1', 'Snora78',…	132	3
Tead2	['Tbl2', 'Unc13b', 'Prpf40b', 'AU022252', 'Acer2', 'Tmem158', 'Sox11', 'Lars2', 'Cited4', 'Phf1', 'Dennd3', 'Cbx7', 'Micall2', 'Ube4b', 'Ralgapa2', 'Prrc2a', 'Macrod2', 'Fbrsl1', 'Zfp296', 'Brpf1', 'Nos3', 'Abr', 'Bap1', 'Casp9', 'Als2cl', 'Tmem150a', 'Zfp263', 'Trio', 'Chrnb1', 'Dgcr2', 'Dnajc21', 'Carm1', 'Kcnk5', 'Sh2b3', 'Fam160a2', 'Fhod1', 'Atf5', 'Edem1', 'Ankrd27', 'Zfp319', 'Adnp2', 'Ppt…	126	3
Hoxc10	['Prrx1', 'Svep1', 'Fermt2', 'Pkdcc', 'Tmem150a', 'Cdk14', 'Slc4a4', 'Ace', 'Ntf3', 'Tcea3', 'Penk', 'Wdr1', 'Mapkapk2', 'Slc43a1', 'Fxyd2', 'Hoxa4', 'Ndrg1', 'Nova1', 'Mdk', 'Eln', 'Timp3', 'Irf1', 'Fam69a', 'Fbn1', 'Fn1', 'Errfi1', 'Sh3gl1', 'Phlda2', 'Vgll3', 'Reps2', 'Ctnnb1', 'Plekhg3', 'Hoxc10', 'Hoxa10', 'Pmepa1', 'Gem', 'Scnn1a', 'Gnas', 'Osr2', 'Zfp503', 'Abl1', 'Kcnk5', 'Mecom', 'Twist1…	110	3
Hoxb7	['Hoxb8', 'E4f1', 'Fosb', 'Epas1', 'Hoxb7', 'Atp1b1', 'Fos', 'Slco2a1', 'Egr1', 'Sin3a', 'Sirt1', 'Fxyd2', 'Capn1', 'Tle4', 'Mlxip', 'Klf3', 'Sdc1', 'Hnrnpu', 'Cdkn1b', 'Hoxa10', 'Tcea3', 'Rab11fip1', 'Rheb', 'Tob1', 'Hoxb5', 'Cyr61', 'Elf3', 'Hoxb6', 'Ikzf2', 'Atf3', 'Pcdh1', 'Ssbp4', 'Csrp2', 'Klf4', 'Nr2f6', 'Mtus1', 'Neurl1b', 'Cachd1', 'Rgs16', 'Cdc14a', 'Zfp36l2', 'Tjp2', 'Fam117b', 'Mgat4b…	86	3
Ddit3	['Ddit3', 'Slc7a11', 'S100a9', 'Gramd3', 'Trib1', 'Slpi', 'Rara', 'Per1', 'Polr2a', 'Aqp9', 'Il1b', 'Rnf149', 'Il1rn', 'Osgin1', 'Clec4e', 'Gadd45g', 'Hsd17b11', 'Nrd1', 'Ear2', 'Fgl2', 'Trem1', 'Tnik', 'Lztfl1', 'Sh2b2', 'F630028O10Rik', 'Ubb', 'Lmnb1', 'Maff', 'Osm', 'Chd7', 'Plk3', 'Sh3gl1', 'Hmg20a', 'Abi1', 'Kctd12', 'Sfxn5', 'Dnajb9', 'Rab11fip1', 'Cdkn2aip', 'Fam76a', 'Esrra', 'Cxcr4', 'S1…	80	3
Egr1	['Bmp4', 'Socs3', 'Fosb', 'Egr1', 'Rora', 'Pcgf2', 'Klf9', 'Ier2', 'Cdh13', 'Junb', 'Fgfr1', 'Atf3', 'Jun', 'Gem', 'Ctdsp2', 'Sfrp1', 'Nbl1', 'Nr4a1', 'Cdkn1a', 'Nfil3', 'Egr2', 'Myh10', 'Egfr', 'Gas1', 'Zfp36', 'Hoxc6', 'Ctnnb1', 'Hipk3', 'Ppp1r10', 'Cited2', 'Mitf', 'Hoxc9', 'Acvr2a', 'Tbc1d8b', 'Btg2', 'Per1', 'Bambi', 'Sestd1', 'Gls', 'Tgfbi', 'Il11ra1', 'Bhlhe40', 'Zfp36l1', 'Nfe2l1', 'Gli1'…	58	3
Rarg	['Zfp219', 'Tacc2', 'Rarg', 'Nxn', 'Pkp3', 'Rbms1', 'Vangl2', 'Serpinb2', 'Chl1', 'Dtx2', 'Kctd15', 'Ephb6', 'Iffo2', 'Col8a2', 'Lrig3', 'Hopx', 'Ssx2ip', 'Slain2', 'Polr3g', 'Sgk3', 'Samd5', 'Pard6g', 'Crabp1', 'Dcaf4', 'Aim1', 'Fam83g', 'S100a4', 'Btbd11', 'Irf6', 'Bcl11b', 'Pls3', 'Dlgap4', 'Sema3f', 'Igfbp3', 'Lmo1', 'Nab1', 'Cast', 'Kctd1', 'Tspan9', 'Celsr2', 'Scmh1']	41	3
Pitx2	['Calml4', 'Slc16a1', 'Slc26a2', 'Pitx1', 'Slc31a1', 'Bdh1', 'Pitx2', 'Cldn7', 'Gtf2ird1', 'Cs', 'Dym', 'Camk1d', 'Aim1l', 'Rangrf', 'Fam83d', 'Isl1', 'Csrp2', 'Ahcyl2', 'Fam109a', 'Erbb2', 'Creb3l1', 'Rfk', 'AA467197', 'Ddi2', 'Nqo1', 'Mtch2', 'Eif2s2', 'Slc25a25', 'Wdr62', 'Slc4a11', 'Esrra', 'Pigr', 'Ppard', 'Hook2', 'Lhpp', 'Prdm1', 'Ehf', 'Higd1a', 'Uqcrh', 'Frat2']	40	3
Gata6	['Gata6', 'Pde5a', 'Nagk', 'Pkdcc', 'Plekha6', 'Csrp2', 'Sqrdl', 'Qsox1', 'Ece1', 'Dap', 'Mecom', 'Epha7', 'Trerf1', 'Arfip1', 'Cldn12', 'Tusc3', 'Galnt7', 'Sec22b', 'Pde3a', 'Cdkn2a', 'Ehbp1', 'Kazald1', 'Rrbp1', 'Tmem218', 'Golgb1', 'Rasef', 'Palb2', 'Stt3b', 'Aldh18a1']	29	3
Foxa2	['Grb7', 'Slc38a4', 'Zfp516', 'Nav2', 'Camk2b', 'Isl1', 'Spp1', 'Pak3', 'Gatsl2', 'Ddc', 'Foxa2', 'Prom1', 'Rap1gap2', 'Frzb', 'Pigr', 'Meg3', 'Atp8b1', 'Pip5k1b', 'Baiap3', '5330417C22Rik', 'Zfhx2', 'Efcab1', 'Scg3', 'Stard10', 'Rnf32', 'Chic1', 'Ero1lb']	27	3
Gli1	['Fbrs', 'Fgf13', 'Gli2', 'Erc2', 'Bcorl1', 'C2', 'Wdpcp', 'Zfp423', 'Egflam', 'Boc', 'Rbks', 'Ak4', 'Ndst1', 'Brca1', 'Ptch1', 'Ankrd13b', 'Col12a1', 'Wnt6', 'Tspan11', 'Cpz', 'Tgfbi', 'Hhip', 'Wnt2', 'Gli1', 'Grem2', 'Pan2']	26	3
Hoxa7	['Hoxb7', 'Kctd15', 'Gpsm2', 'Hoxb6', 'Crim1', 'Hoxa10', 'Peli2', 'Lrrc56', 'Hoxa7', 'Ccdc3', 'Hoxa5', 'Hoxa9', 'Mtx2', 'Lhx2', 'Nt5dc2', 'Gm973', 'Pou3f1', 'Rab44', 'Ephb6', 'Wee1', 'Serpinb2', 'Hmga2', 'Sec23a', 'Alad']	24	3
Gli2	['Rnf165', 'Srpx2', 'Etv4', 'Spats2l', 'Ypel5', 'Foxp2', 'Kremen1', 'Homez', 'Paqr8', 'Egfr', 'Scara3', 'Plekhf1', 'Pdlim2', 'Boc', 'Smoc2', 'Cdon', 'Daam1', 'Gpc3', 'Bmp4']	19	3
Hoxa9	['Hoxa7', 'Angpt1', 'Mycn', 'Meis1', 'Runx2', 'Hoxa9', 'Hoxa10', 'Kcnn4', 'Myl10', 'Cdk6', 'Stk16', 'Tmco4', 'Mdga1', 'Eef2k', 'Akr1e1']	15	3
Nfat5	['Samd4b', 'Furin', 'Prdm2', 'Sp2', 'Stx16', '4932438A13Rik', 'Malat1', 'Etv3', 'Cish', 'Xpot']	10	3
Nfic	['Gng12', 'Elovl1', 'Six5', 'Gabarapl1', 'Tex264', 'Trp53i13', 'Ddah2', 'Nynrin', 'Fam109b', 'Rnf24']	10	3
Tead3	['Lama5', 'Agrn', 'Rnd3', 'Dstn', 'Tead3', 'Maff', 'Ift88', 'Arhgap32', 'Emp1', 'Clasp1']	10	3
Nfatc2	['Sdf2l1', 'Atp2b1', 'Zcchc2', 'Nog', 'Cltc', 'Pex5', 'Rngtt', 'Nfatc2']	8	3
Nfia	['Sgk1', 'Sparc', 'Epha7', 'Vcam1', 'Zfp521', 'Sspn', 'Inhba', 'Foxp2']	8	3
Tbx2	['Nr2f2', 'Tbx2', 'Bmp3', 'Epas1', 'Col13a1', 'Arhgap6', 'Itga1', 'Pdgfrb']	8	3
Foxp2	['Foxp2', 'Smtnl2', 'Hand2', 'Ccni', 'Tnmd', 'Slc24a5']	6	3
Elf1	['Rnf167', 'Rps18', 'Eaf1', 'Cdk13', 'Isy1', 'Arpc2', 'Tnpo3', 'Kti12', 'Senp7', 'Ap1b1', 'Ywhab', 'Stk4', 'Ap1m1', 'Arpc5l', 'Tomm70a', 'Zcchc6', 'Sfswap', 'Sptlc2', 'Rab11a', 'Nipbl', 'Bin3', 'Erh', 'Pigt', 'Zfp668', 'Mfap1b', 'Lsm1', 'Cstf2', 'C2cd3', 'Nudt5', 'Gnai3', 'Daxx', 'Sass6', 'Csnk1g1', 'Hnrnpd', 'Zbtb11', 'Gemin8', 'Il2rg', 'Fbxl12', 'Mbd1', 'Mcm3ap', 'Wdr76', 'Mfap1a', 'Rapgef6', '…	1686	4
Fli1	['Rnf167', 'Ap1m1', 'Zfp668', 'Rac1', 'Ppp4c', 'Fli1', 'Rasgrp3', 'Bin3', 'Fam96a', 'Tbc1d22a', 'Pik3cg', 'Arpc2', 'Epn1', 'Daxx', 'Rpe', 'Rapgef6', 'Klhl6', 'Stk4', 'Snrnp200', 'Gng11', 'Icam1', 'Ccnt1', 'Sass6', 'Dusp6', 'Tbkbp1', 'Tmem204', 'Edem3', 'Rab11a', 'Wdr26', 'Nprl2', 'Lcp2', 'Isy1', 'Cradd', 'Grap', 'Usf1', 'Kdm2b', 'Rgl2', 'Xrn2', 'Mcm3', 'Cap1', 'Nosip', 'Cln3', 'Mta2', 'Cd93', 'Ar…	1640	4
Ets1	['Rnf167', 'Mettl6', 'Ap1m1', 'Polr2a', 'Rac1', 'Ppp4c', 'Arpc5l', 'Fli1', 'Rasgrp3', 'Fam96a', 'Kti12', 'Fbxo28', 'Chd2', 'Daxx', 'Rapgef6', 'Ccdc28a', 'Klhl6', 'Stk4', 'Ercc3', 'Snrnp200', 'Gng11', 'Ccnt1', 'Osmr', 'Dusp6', 'Tmem204', 'Nprl2', 'Pik3c3', 'Trip4', 'Lcp2', 'Parg', 'Mdm4', 'Tmem138', 'Sept1', 'Grap', 'Hmgn1', 'Rgl2', 'Xrn2', 'Klhl20', 'Mcm3', 'Mapk1ip1l', 'Srsf5', 'Nosip', 'Mta2', …	1508	4
Irf8	['Fcgr2b', 'Tmem206', 'Alox5ap', 'Tlr4', 'Map3k8', 'Tagap', 'Elmo1', 'Lpxn', 'Lsp1', 'Plek', 'Cd68', 'Cxcr3', 'Lmo2', 'Arhgap22', 'Samsn1', 'Fcrla', 'Zfp710', 'Ccl4', 'Lrmp', 'Ncf2', 'Cd74', 'Lcp2', 'Cfp', 'Pold4', 'Irf2', 'Siglecg', 'C1qc', 'Slc15a3', 'Bcl2a1b', 'Bcl2a1a', 'H2-K2', 'Plxnc1', 'Gpr183', 'Arhgap30', 'Dok3', 'Laptm5', 'Bcl2a1d', 'Aff3', 'Pla2g15', 'Parp8', '5430427O19Rik', 'Arf6', '…	1306	4
Ikzf1	['Fcgr2b', 'Tmem206', 'Alox5ap', 'Tlr4', 'Tagap', 'Elmo1', 'Usp38', 'Dusp5', 'Lpxn', 'Lsp1', 'Plek', 'Cd68', 'Cxcr3', 'Lmo2', 'Arhgap22', 'Samsn1', 'Fcrla', 'Fbxl12', 'Sp100', 'Zfp710', 'Ccl4', 'Lrmp', 'Ncf2', 'Cd74', 'Lcp2', 'Cfp', 'Pold4', 'Mogat2', 'Irf2', 'Siglecg', 'C1qc', 'Slc15a3', 'Bcl2a1b', 'Vcpip1', 'Bcl2a1a', 'H2-K2', 'Plxnc1', 'Gpr183', 'Arhgap30', 'Dok3', 'Laptm5', 'Bcl2a1d', 'Spn', …	1230	4
E2f4	['Mcm3', 'Mcm6', 'Nolc1', 'Casp8ap2', 'Ranbp1', 'Mcm4', 'Thoc2', 'Lig1', 'Uhrf1', 'Ssrp1', 'Hells', 'Gins3', 'Hnrnpul1', 'Atad2', 'Sin3a', 'Gins2', 'Suz12', 'Srsf2', 'Rnf167', 'Mdga1', 'Nop10', 'Dusp6', 'Kntc1', 'Mcmbp', 'Sec22b', 'Ythdf1', 'Trmt6', 'Nubp1', 'Hist1h4d', 'Tcf19', 'Rbl1', 'Cchcr1', 'Mdc1', 'Srsf1', 'Tra2b', 'Slc25a11', 'Gabpb1', 'Nfkbil1', 'Cep57', 'Tle3', 'Trerf1', 'Donson', 'Cstf…	1222	4
Hcfc1	['Tsg101', 'Ippk', 'Eaf1', 'Paip2', 'Cdk13', 'Ap1m1', 'Tssc4', 'Vps52', 'Psmb7', 'Bcl2l1', 'Zranb2', 'Cbll1', 'Rnf167', 'Stk4', 'Slc25a46', 'Nipbl', 'Sf3b4', 'Eif3g', 'Parg', 'Cap1', 'Eif2b2', 'Isy1', 'Atp2c1', 'Sart3', 'Kctd5', 'Mdm4', 'Skiv2l', 'Hnrnpd', 'Mcrs1', 'Ppil2', 'Phrf1', 'Senp7', 'Trim35', 'Vps13b', 'Topbp1', 'Hars', 'Rsl24d1', 'Pigt', 'Cops3', 'Itpa', 'Gtpbp4', 'Trappc4', 'Hccs', 'Ed…	1019	4
Tfdp1	['Mcm3', 'E2f8', 'Mcm6', 'E2f2', 'Casp8ap2', 'Ranbp1', 'Mcm4', 'H2afv', 'Lig1', 'Uhrf1', 'Ssrp1', 'Hells', 'Gins3', 'E2f1', 'Zfp367', 'Mxd3', 'Pola1', 'Atad2', 'Gins2', 'Ncapg', 'Srsf2', 'Cdc6', 'Mycn', 'Rfwd3', 'Kntc1', 'Sec22b', 'Mcm8', 'Hist1h4d', 'Tcf19', 'Rbl1', 'Cchcr1', 'Srsf1', 'Tra2b', 'Psat1', 'Lta4h', 'Gabpb1', 'Hist1h1e', 'Baz1b', 'Bub3', 'Ssbp2', 'Donson', 'Rsf1', 'Wee1', 'Wdr77', 'H…	997	4
Irf5	['Trim8', 'Zfp710', 'Irf2', 'Oasl1', 'Pan3', 'Slc15a3', 'Map3k8', 'Elmo1', 'Ccl5', 'Zbp1', 'Stap1', '5430427O19Rik', 'Rasgrp3', 'Zfp36l1', 'Ccl4', 'Fcgr4', 'Cybb', 'Bst2', 'Parp14', 'B2m', 'Utp14a', 'Alox5ap', 'Actb', 'Il4i1', 'Asph', 'Ptpn6', 'Dclre1c', 'Clec7a', 'Sgms1', 'Uba7', 'Arhgap25', 'Col27a1', 'Tlr4', 'Cxcr5', 'Cd274', 'Fli1', 'Mgat4a', 'Msr1', 'Ctbp2', 'Arhgef6', 'Tgif2', 'Grap', 'Gna1…	961	4
Taf1	['Tsg101', 'Ippk', 'Eaf1', 'Trip4', 'Paip2', 'Arpc5l', 'Psmb7', 'Gga1', 'Zranb2', 'Cbll1', 'Nprl2', 'Dpp8', 'Polr2h', 'Eif2b2', 'Isy1', 'Ap1s2', 'Skiv2l', 'Mcrs1', 'Sec31a', 'Phrf1', 'Rnf185', 'Vps13b', 'Eif3i', 'Snrnp200', 'Tor1b', 'Kctd10', 'Tcp1', 'Hars', 'Lrrc47', 'Itpa', 'Trappc4', 'Anks1', 'Sfswap', 'Med14', 'Arl5b', 'Aak1', 'C2cd3', 'Ppme1', 'Tprgl', 'Tnks', 'Polr2j', 'Mark3', 'Dmap1', 'Hs…	902	4
Elf4	['Pik3cg', 'Bin3', 'Nr1h2', 'Lypla2', 'Tsc22d4', 'Pik3r5', 'Dalrd3', 'Usp38', 'Arhgap25', 'Phrf1', 'Rrp12', 'Irf1', 'Ccnt1', 'Mark2', 'Vps13b', 'Mta2', 'Itpa', 'Bcl2a1b', 'Arih2', 'Fcgr4', 'Arpc3', 'Spata2', 'Aak1', 'Sptlc2', 'Bcl2a1d', 'Tlr4', 'Midn', 'Slc22a18', 'Rasgrp3', 'Polr2j', 'Gapt', 'Eif4e2', 'Vav1', 'Stab1', 'Rapgef6', 'Shoc2', 'Ddit3', 'Cggbp1', 'Ppp1r16b', 'Mfap1a', 'Hcls1', 'Plcb2',…	893	4
Stat1	['Alox5ap', 'Map3k8', 'Tagap', 'Elmo1', 'Usp38', 'Lsp1', 'Cxcr3', 'Lmo2', 'Samsn1', 'Sp100', 'Cd74', 'Cfp', 'Arhgef3', 'Irf2', 'Klhl28', 'Itpkb', 'Bcl2a1b', 'Sh3tc1', 'Cd36', 'H2-K2', 'Plxnc1', 'Gpr183', 'Bcl2a1d', 'Arf6', 'Pik3r5', 'Pkn1', 'Nrp2', 'H2-K1', 'Coro1b', 'Stk4', 'Stap1', 'Nfkbid', 'Itpripl1', 'Psmb3', 'Arhgap25', 'Ccl3', 'Taf15', 'Camp', 'Sorbs3', 'Rftn1', 'H2-Q6', 'Rab5c', 'Msr1', '…	867	4
E2f2	['E2f2', 'E2f1', 'E2f8', 'Mcm3', 'Mycn', 'Pola1', 'Mcm8', 'Cdc25a', 'Rbl1', 'Uhrf1', 'Ints7', 'Dtl', 'Cdk1', 'Hist1h2bm', 'Hells', 'Lig1', 'Mcm5', 'Srsf1', 'Nipbl', 'Mbnl3', 'Atad2', 'Myb', 'Patz1', 'H2afv', 'Ddx17', 'Cep57', 'Msh3', 'Ppp1cc', 'Chaf1a', 'Ing3', 'Fam76b', 'Arhgap11a', 'Agfg2', 'Slbp', 'Clspn', 'Atm', 'Bub3', 'Cdca7', 'Kbtbd7', 'Mrpl18', 'Hlx', 'Hist1h2bj', 'Hist1h2ag', 'Kif15', 'A…	865	4
Irf7	['Polr2a', 'Rtp4', 'Isg15', 'Irf2', 'Oasl1', 'Ifit3', 'Usp18', 'Rsad2', 'Zbp1', 'Fcgr4', 'Cybb', 'Bst2', 'Ifitm2', 'Parp14', 'Itpkb', 'B2m', 'Hist1h1c', 'Fn1', 'Nedd9', 'Mtmr11', 'Cxcl10', 'Prrx1', 'Socs1', 'Actb', 'Dclre1c', 'Clec7a', 'Sgms1', 'Cdk12', 'Oas2', 'Uba7', 'Cd274', 'Plxnc1', 'Mgat4a', 'Tnks1bp1', 'Msr1', 'Sp100', 'Sell', 'Ctnnd1', 'Runx3', 'Ablim1', 'Gse1', 'Cdkn1c', 'Ifit1', 'Plek',…	860	4
E2f1	['Prr11', 'Cdkn3', 'Lman2l', 'Sesn3', 'Cks1b', 'Rpa2', 'Cdc6', 'Cdca2', 'Ccnb2', '0610007P14Rik', 'Dtl', 'Kif18b', 'Ppp1r7', 'Ect2', 'Pola1', 'Asb7', 'Aurka', 'Cnot1', 'Mospd3', 'H2afx', 'Nup88', 'Cdk1', 'E2f8', 'Ung', 'Hmgb2', 'Fam117a', 'Lrrc20', 'Aspm', 'Cntd1', 'H2afv', 'Top2a', 'Hist1h3g', 'Terf1', 'Mcm7', '2610318N02Rik', 'Uhrf1', 'Plk1', 'Fam64a', 'Asf1b', 'Cenpf', 'Nek2', 'Aurkb', 'Lcmt1'…	809	4
Irf9	['Rtp4', 'Isg15', 'Irf2', 'Oasl1', 'Ifit3', 'Pan3', 'Usp18', 'Rsad2', 'Map3k8', 'Zbp1', 'Zfp36l1', 'Fcgr4', 'Bst2', 'Cdipt', 'Parp14', 'B2m', 'Zwilch', 'Asxl1', 'Socs1', 'Actb', 'Ptpn6', 'Sgms1', 'Oas2', 'Uba7', 'Arhgap25', 'Cd274', 'Fli1', 'Msr1', 'Arhgef6', 'Gng11', 'Xpo6', 'Grap', 'Usp38', 'March1', 'Sp100', 'Sell', 'Lmo2', 'Runx3', 'Tbkbp1', 'Il6st', 'Ifit1', 'H2-K1', 'Xaf1', 'H2-D1', 'Prex2'…	755	4
Irf2	['Usp38', 'Lmo2', 'Samsn1', 'Ccl4', 'Lrmp', 'Ncf2', 'Cd74', 'Cfp', 'Irf2', 'Slc15a3', 'Vcpip1', 'Sh3tc1', 'H2-K2', 'Arhgap30', 'Dok3', 'Arf6', 'Pik3r5', 'Ptpn6', 'Pkn1', 'H2-K1', 'Coro1b', 'Plscr1', 'Hirip3', 'Arhgap11a', 'Pik3cg', 'Itpripl1', 'Arhgap25', 'Polr2a', 'Bank1', 'Pan3', 'Taf15', 'Arid3b', 'Herpud1', 'H2-Q6', 'Ncf1', 'Rab5c', 'Msr1', 'Actb', 'Prkab1', 'Lsm1', 'Btk', 'H2-D1', 'Pip5k1b',…	731	4
Elf2	['Cdk13', 'Tnpo3', 'Kti12', 'Senp7', 'Ptrh2', 'Tomm70a', 'Zcchc6', 'Sptlc2', 'Dalrd3', 'Cstf2', 'Nudt5', 'Gnai3', 'Csnk1g1', 'Fibp', 'Fam96b', 'Mfap1a', 'Xab2', 'Exosc3', 'Eif2b2', 'Arl5b', 'Zfp105', 'Crk', 'Srpr', 'Ss18', 'Nol6', 'Mark2', 'Timm23', 'Psmb7', 'Srsf5', 'Uba52', 'D030056L22Rik', 'Uba6', 'Cops7a', 'Mon1b', 'Lztfl1', 'Sh3gl1', 'Pafah1b2', 'Itpa', 'Tfg', 'Paip2', 'Khdrbs1', 'Ccnt1', 'G…	729	4
E2f6	['Eif2s1', 'Alg8', 'Tmem109', 'Ndufa8', 'Cbx5', 'Maged1', 'Kifap3', 'Golga1', 'Pip5k1a', 'Smad5', 'Pccb', 'Mlh3', 'Crtc1', '2310057M21Rik', 'Slc39a10', 'Ubn2', 'Lsm7', 'Eed', 'Zscan29', 'Hspa8', 'Mrpl32', 'Nnat', 'Dnaja3', 'Sap18', 'Tbc1d15', 'Mtch2', 'Ccdc86', 'Fam134c', 'Zcwpw1', 'Tubg1', 'Pola1', 'Uxs1', 'Rfxap', 'Spop', 'Ptpn23', 'Eif1', 'Ipo11', 'Kat2a', 'Tmem106b', 'Ppme1', 'Rps19bp1', 'Fxr…	721	4
Spib	['Fcgr2b', 'Map3k8', 'Tagap', 'Usp38', 'Lpxn', 'Lsp1', 'Ppp1r16b', 'Lmo2', 'Samsn1', 'Fcrla', 'Fbxl12', 'Sp100', 'Lrmp', 'Cd74', 'Cfp', 'Pold4', 'Arhgef3', 'Irf2', 'Siglecg', 'H2-K2', 'Plxnc1', 'Gpr183', 'Dok3', 'Bcl2a1d', 'Aff3', 'Pan2', 'Arf6', 'Ptpn6', 'Rasgrp3', 'Stk4', 'Hirip3', 'Arhgap11a', 'Stap1', 'Nfkbid', 'Polr2a', 'Bank1', 'Wdfy4', 'Rftn1', 'Arid3b', 'Rps18', 'Tfb2m', 'Herpud1', 'H2-Q6…	701	4
Rel	['Nfkb2', 'Cxcl10', 'Nfkbia', 'Tnfaip3', 'Nfkbiz', 'Stat5a', 'H2-Q6', 'Rel', 'Relb', 'Cd74', 'H2-K2', 'Cd69', 'Tank', 'Map3k8', '5430427O19Rik', 'Neurl3', 'Cxcr5', 'Stx11', 'Irf2', 'Ltb', 'Spib', 'H2-Aa', 'Rnd1', 'Mtmr14', 'Cxcl2', 'Irf1', 'Camk1d', 'Fchsd2', 'Nr4a2', 'Dusp5', 'Prkcd', 'Atg16l2', 'Ptpn2', 'Cd40', 'Strada', 'Rrad', 'Jak2', 'Notch2', 'Ccrl2', 'Casp4', 'Tfpi2', 'Ccl4', 'Sdc4', 'Sirt…	681	4
Ep300	['Tnpo3', 'Csnk1g1', 'Cdk13', 'Epn1', 'Dnajb9', 'Syvn1', 'Ptrh2', 'Zcchc6', 'Nprl2', 'Arih2', 'Ppp1r16a', 'Zfp668', 'Mdm4', 'Nipbl', 'Sec31a', 'Stk4', 'Slc39a9', 'Rab24', 'Rab11a', 'Wdr26', 'Ubox5', 'Sfswap', 'Dpp8', 'Kif9', 'Ap1b1', 'Leprotl1', 'Hspa4', 'Morn1', 'Eif2b2', 'C2cd3', 'Cap1', 'Cbll1', 'Ap1s2', 'Pik3cg', 'Vps25', '8430429K09Rik', 'Trim35', 'Hnrnpd', 'Edc4', 'Rps6kc1', 'Vps13b', 'Skiv…	633	4
Kdm5a	['Tnpo3', 'Ippk', 'Arfip1', 'Arpc2', 'Paip2', 'Dhx36', 'Csnk1g1', 'Arpc5l', 'Ppp4c', 'Gga1', 'Rnf167', 'Urm1', 'Mtmr4', 'Nipbl', 'Fbxl12', 'Rab24', 'Tbc1d22a', 'Med14', 'Parg', 'Daxx', 'Mdm4', 'Leprotl1', 'Chd2', 'Gabarapl2', 'Arpc3', 'Mark2', 'Ppil2', 'Acin1', 'Cggbp1', 'Cdc123', 'Tor1b', 'Bag4', 'Dnajc14', 'Arfgap1', 'Zc3h13', 'Zfp410', 'Sept1', 'Pigt', 'C2cd3', 'Tomm20', 'Mbd1', 'Skiv2l', 'Syn…	624	4
Nr2c2	['Cog3', 'Tnpo3', 'Epn1', 'Sfswap', 'Arih2', 'Mettl6', 'Cd2bp2', 'Gabpa', 'Paip2', 'Csnk1g1', 'Tmem138', 'Usp11', 'Rpf2', 'Syvn1', 'Fbxo28', 'Rab24', 'Mgat1', 'Chtf8', 'Phrf1', 'Hcfc1', 'Parg', 'Hspa4', 'Exosc3', 'Vps33b', 'Polr2a', 'Sco1', 'Dalrd3', 'Secisbp2', 'Usp38', 'Zfp653', 'Ccnt1', 'Thap2', 'Fkbp2', 'Senp7', 'Vps13b', 'Zfp668', 'Snrnp200', 'Dzip3', 'Yme1l1', 'Zfp697', 'C2cd3', 'Cbll1', 'K…	612	4
Usf1	['Fam118b', 'Sppl3', 'Vac14', 'Orai3', 'Slc38a9', 'Tmem229b', 'Tbc1d13', 'Zfpl1', 'Xab2', 'Clptm1l', 'Triap1', 'Sdhaf1', 'Tmem55b', 'Zfp292', 'Fam134a', 'Neurl2', 'Atg3', 'Slc35a5', 'Hnrnph2', 'Dhx35', 'Mfsd1', 'Glyr1', 'Commd9', 'Cln3', 'Mcoln1', 'Vps33a', 'Rragc', 'Cuta', 'Morc2a', 'Tsc1', 'Mtdh', 'Scamp3', 'Cc2d1b', 'Zbtb25', 'Snrpa', 'Adam10', 'Thumpd2', 'Fbxo33', 'Fam192a', 'Faf1', 'Lin54', …	612	4
Runx3	['Ptpn22', 'Fmnl1', 'Sh2d3c', 'Batf', 'Ccdc50', 'Cytip', 'Rgs1', 'Gpr171', 'Cd28', 'Ctsw', 'Tspan32', 'Cd160', 'Napsa', 'Xcl1', 'Gpr132', 'Pou2f2', 'AI504432', 'Mpo', 'Runx3', 'Ccl3', 'Txk', 'Fam96a', 'Nfe2', 'Lrmp', 'Lck', 'Akap13', 'Arhgap15', 'Def6', 'Was', 'Arhgap30', 'Rac2', 'Iqgap2', 'H2afx', 'Ubash3a', 'AI467606', 'Dok2', 'Klrk1', 'Btla', 'Runx2', 'Chad', 'Elmo2', 'Rilpl2', 'Ezr', 'Itgal',…	586	4
Gabpa	['Cog3', 'Rnf167', 'Mettl6', 'Cdk13', 'Kti12', 'Tssc4', 'Dcun1d3', 'Sfswap', 'Slc25a46', 'Tbc1d22a', 'Bin3', 'Mfap1b', 'Lsm1', 'Ppme1', 'Gnai3', 'Ankrd42', 'Mbd1', 'Tmem138', 'Crk', 'Rpf2', 'Med14', 'Eif3i', 'Parg', 'Mta2', 'D030056L22Rik', 'Wdr45', 'Mon1b', 'Acin1', 'Ipo7', 'Smu1', 'Tor1b', 'Prpf3', 'Naa35', 'Gabpa', 'Rab24', 'Edc4', 'Tnks', 'Tcf7', 'Rxrb', 'Cd2bp2', 'Coro1c', 'Zfc3h1', 'Rpf1', …	585	4
Sin3a	['Tnpo3', 'Tsg101', 'Csnk1g1', 'Tssc4', 'Paip2', 'Gnai3', 'Pyroxd1', 'Cd2bp2', 'Slc25a46', 'Zcchc6', 'Bag4', 'Zfp668', 'Sec31a', 'Pik3r4', 'Dpp8', 'Zranb2', 'Ap1b1', 'Ppid', 'Morn1', 'Srbd1', 'C2cd3', 'Cops3', 'Sf3a3', 'Vps25', 'Rnf185', 'Edem3', 'Chtf8', 'Ccz1', 'Wdr45', 'Parl', 'Pigt', 'Zc3h13', 'Ercc3', 'Ncstn', 'Rsl24d1', 'Hcfc1', 'Yme1l1', 'Trappc8', 'Rpe', 'Nek9', 'Tmem127', 'Mlycd', 'Mark3…	576	4
Cebpe	['Plxnc1', 'Lcn2', 'Camp', 'Slc7a11', 'Pfn1', 'Hmgn2', 'Dram1', 'Actb', 'Hsd11b1', 'Rara', 'Jdp2', 'Gys1', 'Lmo4', 'S100a8', 'Aldh3b1', 'C3', 'Il1rn', 'Asns', 'Sirpa', 'Olr1', 'Ncam1', 'Lrrfip2', 'Flot1', 'Rgs18', 'Mxd3', 'Mmp8', 'Mmp9', 'Fam65b', 'Hk3', 'Cybb', 'Slpi', 'Rell1', 'Actn1', 'F630028O10Rik', 'Slc15a3', 'Pilrb1', 'Clec12a', 'Sephs2', 'Mapk14', 'Mxd1', 'Hist1h1b', 'Trem3', 'Tmsb4x', 'V…	531	4
Pml	['Mettl6', 'Urm1', 'Lypla2', 'Ap1m1', 'Utp14a', 'Cdk13', 'Rapgef6', 'Daxx', 'Nosip', 'Arpc5l', 'Ap1b1', 'Cstf2', 'Hspa4', 'C2cd3', 'Rpe', 'Prpf19', 'Syvn1', 'Polr2a', 'Serp1', 'Pik3r4', 'Nipbl', 'Bin3', 'Zbtb12', 'Il2rg', 'Hnrnpd', 'Kif9', 'Lrrc49', 'Topbp1', 'Sh3gl1', 'Edc4', 'Cd2bp2', 'Ppil2', 'Sf3b2', 'Clasp1', 'Lsm3', 'Rps27', 'Hcfc1', 'Usp38', 'Smu1', 'Ngrn', 'Ascc2', 'Acin1', 'Fli1', 'Uba2'…	516	4
Nfkb2	['Nfkbia', 'Ltb', 'Creb1', 'Cd74', 'Rel', 'Cd69', 'Stat5a', 'Ptpn2', 'Nfkb2', 'Tnfaip3', 'Cxcr5', 'Map3k8', 'H2-Aa', 'Irf2', 'Tnip1', 'Tank', 'H2-K2', 'H2-Q6', 'Cxcl2', 'Socs5', 'Cxcl1', 'Ankhd1', 'Relb', 'H2-D1', 'H2-K1', 'Arl5b', 'Hivep2', 'Ino80d', 'Uck2', 'Wac', 'Csf1', 'Rnf31', 'Psme2', 'Nfatc1', 'Tpbg', 'Casp4', 'Gripap1', 'Rara', 'Osmr', 'Notch2', 'Sirt1', 'Pck2', 'Itsn2', 'Cdk17', 'Sdc4',…	466	4
Elk4	['Kti12', 'Vps52', 'Zcchc6', 'Gnai3', 'Cradd', 'Ss18', 'Itpa', 'Lrrc47', 'Slx1b', 'Zfc3h1', 'Wdr45', 'Hcfc1', 'Zfp653', 'Phf23', 'Topbp1', 'Pcsk7', 'Rgl2', 'Ttpal', 'Srpr', 'Nfat5', 'Mastl', 'Ccnt1', 'Zfp110', 'Med6', 'Tomm20', 'Tprgl', 'Cstf3', 'Edem3', 'Hccs', 'Tram2', 'Grap', 'Arhgef3', 'Dnajc14', 'Thap11', 'Srsf2', 'Tmem127', 'Ubn2', 'Papd4', 'Chuk', '1110004E09Rik', 'Ap4e1', 'Dnm3os', 'Pde12…	459	4
Relb	['Nfkb2', 'Gpbp1', 'Icam1', 'Relb', 'Ltb', 'Map3k8', 'Cxcl1', 'Zfp697', 'Cd69', 'Rel', 'Sdc4', 'Tank', 'Elf3', 'Tnip1', 'Cd74', 'Ccl5', 'Neurl3', 'Dusp5', 'Hivep2', 'Egr2', 'Ifngr2', 'Tnfrsf9', 'Stx11', 'Ccnl1', 'Pou2f2', 'Cdk17', 'Fas', 'Wisp1', 'Gabpb1', 'Uck2', 'Rps19', 'Mapk1ip1l', 'Myo1c', 'Socs2', 'H2-Aa', 'Itpkc', 'Tfpi2', '2410006H16Rik', 'Kctd5', 'Il6st', 'Slc38a1', 'H2-K2', 'Cd40', 'Ahc…	427	4
Yy1	['Arfgef1', 'Zc3h4', 'N4bp1', 'Hnrnpa3', 'Tmem131', 'Inppl1', 'Rgp1', 'Tbx18', 'Stard7', 'Akirin2', 'Riok3', 'Rsrc1', 'Taf5', 'U2af2', 'Ankhd1', 'Jmjd1c', 'Sphk2', 'Cul3', 'Nfkbil1', 'Prpf18', 'Rbm15', 'Narf', 'Slc34a2', 'Arid4a', 'Rad23b', 'Rreb1', 'Cenpp', 'Zbtb44', 'Srrm1', '1810026B05Rik', 'Hist1h2ag', 'Pds5a', 'Ppp2r5c', 'Med13l', 'Igf2bp3', 'Xpo4', 'Brd4', 'Ank1', 'Pik3c2b', 'Ralgapa2', 'Ar…	420	4
Trp53	['Cwc22', 'Cbll1', 'Ahsa1', 'Wdr12', 'Ints9', 'Erp44', 'Serbp1', 'Abcf2', 'Pdcd10', 'Rad18', 'Shmt2', 'Ubl7', 'Cdc26', 'Rpl7', 'Grwd1', 'Cep57l1', 'Kat2a', 'Rpl6', 'Lrwd1', 'Cenpt', 'Ing3', 'Rnaseh2a', 'Lman2', 'Tmed9', 'Scamp3', 'Tubb5', 'Papola', 'N4bp2l2', 'Ssr2', 'Rplp2', 'Exosc1', 'Ccdc22', 'Rps23', 'Rpl8', 'Tor2a', 'Iws1', 'Pus3', 'Rps13', 'Dcps', 'Ddx47', 'Rpl18a', 'Rnaseh2c', 'Luc7l', 'Wd…	418	4
E2f7	['Mcm3', 'E2f8', 'Mcm6', 'E2f2', 'Casp8ap2', 'Mcm4', 'Lig1', 'Ybx2', 'Uhrf1', 'Ssrp1', 'Hells', 'E2f1', 'Zfp367', 'Mxd3', 'Topbp1', 'Pola1', 'Atad2', 'Gins2', 'Ncapg', 'Uhrf2', 'Suz12', 'Srsf2', 'Cdc6', 'Mycn', 'Rfwd3', 'Kntc1', 'Mcm8', 'Hist1h4d', 'Tcf19', 'Rbl1', 'Lta4h', 'Gabpb1', 'Hist1h1e', 'Baz1b', 'Npat', 'Wee1', 'Hist1h2bm', 'Mcm5', 'Gnai3', 'Mtf2', 'Mybl2', 'Mbnl3', 'Epn1', 'Rad51ap1', '…	415	4
Etv3	['Cap1', 'Usp38', 'Arhgef3', 'Pyroxd1', 'Lypla2', 'Ap1b1', 'Hspa4', 'Isy1', 'Gga1', 'Sh2d1b1', 'Ddx21', 'Nfat5', 'Zcchc6', 'Kif9', 'Fcgr4', 'Arpc2', 'Zfp384', 'Rrp12', 'Tnks', 'Ipcef1', 'Il7r', 'Ccr2', 'Cd14', 'Ms4a7', 'Zfp830', 'Skil', 'Trerf1', 'Ccr7', 'Olfm1', 'Adcy7', 'Eif4e2', 'Elmo2', 'Plek2', 'Sp2', 'Bcl2a1b', 'Clec10a', 'Bcl2a1d', 'Bcl2a1a', 'Ppil2', 'E2f4', 'Mpzl3', 'Ms4a6d', 'Dedd', 'Cl…	366	4
Setdb1	['Tial1', 'Fem1a', 'Prcc', 'Sympk', 'Vcpip1', 'Ctdp1', 'Rangap1', 'Smarcal1', 'Calcoco1', 'Itpr1', 'Sdccag8', 'Dffa', 'Srrm2', 'Fbxw11', 'Irf2bp1', 'Polrmt', 'Chek2', 'Fgd6', 'Zfp260', 'Rbl2', 'Tmem208', 'Kat2a', 'Abcc5', 'Mrpl24', 'Ranbp10', 'Hsd17b4', 'Slc25a27', 'Itch', 'Mtm1', 'Gpt2', 'Dtx2', 'Pcgf6', 'Slc38a7', 'Terf2', 'Cand1', 'Plaa', 'Rps6kb2', 'Slc27a4', 'Nbr1', 'Ipo13', 'Dennd1a', 'Lrrc…	336	4
Usf2	['Amdhd2', 'Ubap2l', 'Fam134a', 'Atp6v0d1', 'Ubn1', 'Sgol1', 'Cln3', 'Ankrd12', 'Cuta', 'Lin52', 'Dirc2', 'Nptn', 'Slc36a1', 'Zfp574', 'Usp32', 'Rnf115', '6430548M08Rik', 'Wdr81', 'Trim8', 'Csrp2bp', 'Orai2', 'Rara', 'Zdhhc14', 'Gnb2', 'Zfp217', 'Cyhr1', 'Nfatc2', 'Adck1', 'Taf6l', 'Dleu2', 'Pepd', 'Synrg', 'Aff1', 'Nup188', 'Bloc1s3', 'Per1', 'Thnsl1', 'Fgd4', 'Rab5c', 'Letm2', 'Casp9', 'Stag1',…	329	4
Mxi1	['Amdhd2', 'Atg3', 'Slc35a5', 'Nptn', 'Atp6v0b', 'Gnptg', 'Wwp2', 'Tmem55b', 'March8', 'Sppl3', 'Hps3', 'Usp31', 'Dolk', 'Stx6', '2810408I11Rik', 'Gnb2', 'Acap2', 'Faf1', 'Rab5a', 'Anln', 'Pcgf2', 'Pdp1', 'Fnip1', 'Mff', 'Bnip3l', 'Net1', 'Slc31a2', 'Megf9', 'Elmo2', 'Tom1l2', 'Ccng2', 'Atp6v1a', 'Smc3', 'Mtm1', 'Fbxo32', 'Sgta', 'Tbcel', 'Tbc1d20', 'Mfhas1', 'Slc16a1', 'Chn2', 'Bloc1s3', 'Fbxl5'…	302	4
Nfyb	['Sesn3', 'Iqcd', 'Ift80', 'Pgrmc2', 'Ip6k2', 'Pnkd', 'Col11a2', 'Prps1', 'Orc1', 'Ypel5', 'Prr11', 'Vcp', 'Hnrnpul1', 'Cep57', 'Pin1', 'Tbc1d10b', 'Sp2', 'Ccng2', 'Hist1h2bb', 'Camta1', 'Hist1h3g', 'Aifm1', 'E2f8', 'Recql', 'Ppp1r7', 'Ccne1', 'Golt1b', 'Stip1', 'Ppp2r5a', 'Acin1', 'Ppm1b', 'Ldb1', 'Lin52', 'Pcna', 'Prpf40a', 'Pnrc2', 'Cdca3', 'Arl6ip6', 'Immp1l', 'Gbf1', 'Hmgb1', 'Dnajb5', 'Mrps…	290	4
Ctcf	['Cyld', 'Rab8a', 'Rbx1', 'Casp8ap2', 'Xpo1', 'Chd8', 'Atf7ip', 'Thrap3', 'Sp3', 'Pten', 'Jarid2', 'Nipbl', 'Sf1', 'Ubtf', 'Zmat1', 'Satb1', 'Tnrc6c', 'Kdm6a', 'Rev3l', 'Arid2', 'Gsk3b', 'Bcor', 'Bcl2', 'Cggbp1', 'Zfp143', 'Golga4', 'Rap1a', 'Lmo4', 'Arid1a', 'Pde10a', 'Brpf1', 'Ctcf', 'Pcdh17', 'Ubap2', 'Tlk1', 'H3f3a', 'Nr2c2', 'L3mbtl3', 'Tle3', 'Irf2bp1', 'Hnrnpd', 'Dyrk1a', 'Cdk17', 'Cnot6l'…	243	4
Gfi1	['Pxmp4', 'Asf1b', 'E2f8', 'Prr11', 'Hnrnpul1', '4930427A07Rik', 'Plk1', 'Cnot3', 'Agfg2', 'Hist1h1b', 'Ect2', 'Top2a', 'Rbm14', 'Hist1h3a', 'Ncapd2', 'Mis12', 'Cdca2', 'Ldhb', 'Kcnab2', 'Ints7', 'Dtl', 'Ung', 'Rhof', 'Stil', 'Hist1h3e', 'Cbx8', 'Fam117a', 'Suz12', 'Recql', 'Ezh2', 'Wbscr27', 'Tspan13', '6030458C11Rik', 'Tes', 'Cdk1', 'Bcl2l11', 'Cdc45', 'Cenpk', 'Msh2', 'Larp4b', 'Thy1', 'Pif1',…	243	4
Sp1	['Sh2b3', 'Radil', 'Tmem87b', 'Zhx1', 'Sec16a', 'Axin1', 'Cirbp', 'Fchsd1', 'Hdac3', 'AU022252', 'Ctnnbip1', 'Siae', 'Rtf1', 'Lrig2', 'Apeh', 'Cib1', '1110008P14Rik', 'Scyl2', 'Mnt', 'Sntb2', 'Psmd12', 'Smg1', 'Zfand5', 'Afg3l2', 'Cap1', 'Slc2a4', 'Bsdc1', 'Pnpla2', 'Kctd6', 'Otud5', 'Phf1', 'Spata6', 'Map3k14', 'Cad', 'Tgif2', 'Csnk2a1', 'Mepce', 'Nub1', 'Fmn1', 'Zbtb22', 'Nup98', 'Zc3h12a', 'Po…	238	4
Elk1	['Zfp668', 'Csnk1g1', 'Pafah1b2', 'Ino80e', 'Psme4', 'Larp4b', 'Cnot10', 'Zbtb41', 'Ino80', '2610306M01Rik', 'Zfp653', 'Mapk8ip3', 'Anks1', 'Flot2', 'Uspl1', 'Eif5a2', 'Meis1', 'Mlec', 'Usp32', '8430429K09Rik', 'Srfbp1', 'Cul7', 'Med19', 'Shq1', 'Zfp800', 'Wdr76', 'Scyl2', 'Yipf2', 'Usp11', 'Pcyt1a', 'Zbtb17', 'Zfp27', 'Actr6', 'Tram2', 'Rwdd4a', 'Men1', 'Irf2', '2010111I01Rik', 'Rgl2', 'Fbxl6', …	220	4
Irf3	['Narf', 'Terf1', 'Stx5a', 'Slc19a2', 'Zcchc2', 'Zmym5', 'Imp4', 'Copz1', 'Dpp3', 'Ttc9c', 'Med8', 'Mtmr14', 'Slc44a2', 'Fbxo42', 'Wipf2', 'Actr1a', '2510039O18Rik', 'Ubtf', 'Mga', 'Cnot1', 'Hnrnpc', 'Zfp217', 'Daxx', 'Usp4', 'Zbtb7a', 'Hnrnpr', 'Harbi1', 'Axin1', 'Sppl3', 'Hspa4', 'Pgpep1', 'Arpc5l', 'Zfp143', 'Fam109a', 'Gpbp1', 'Mettl3', 'Zfp395', 'Hmg20b', 'Gbf1', 'Morf4l1', 'Pabpc1', 'Rhot1'…	213	4
Mecp2	['Fibp', 'Wdyhv1', 'Edc4', 'Nr6a1', 'Ubr1', 'Fam188a', 'Edem3', 'Psme3', 'Plxnb1', 'Fbxo32', 'Golga1', 'Mark3', 'Gcn1l1', 'Lztr1', 'Spred2', 'Cacna1a', 'Rbbp6', 'Dsn1', 'Hcfc1', 'Tmed8', 'Stx18', 'Lrrc47', 'Dab2ip', 'Ppil2', 'Jarid2', 'Ubn2', 'Mettl6', 'Zer1', 'Camta1', 'Fbxw7', 'Fbxw8', 'Yipf2', 'Ino80e', 'G3bp2', 'Lcmt1', 'Kdm2b', 'Pih1d2', 'Phrf1', 'Pcsk7', 'Urm1', 'Krit1', 'Ube2q1', 'Usp32', …	203	4
Nfya	['Cdkn3', 'Hscb', 'Iffo1', '1700056E22Rik', 'Nup98', 'Sp1', 'Ttf2', 'Cnnm2', 'Cdk1', 'Terf1', 'Hist1h3g', 'Ung', 'Cnot1', 'Ect2', 'Fam76b', 'Mmab', 'Arhgap11a', 'Cdc45', 'Pola1', 'Kif18b', 'Asf1b', 'Ncapd2', 'Rec8', 'Lancl1', 'Cks2', 'Lrrc20', 'Fam72a', 'Mcm8', 'Mre11a', 'Mapk7', 'Cenpk', 'Fam64a', 'Phf6', 'Mlec', 'Hnrnpr', 'Taf4b', 'Cit', 'Cenpm', 'Sertad2', '1810026B05Rik', 'Gys1', 'Lpcat3', 'K…	192	4
Bdp1	['Wipf2', 'Slc44a2', 'Gjc1', 'Zbtb7a', 'Morf4l1', 'Ccdc125', 'Purb', 'Gpbp1', 'R3hdm2', 'Vprbp', 'Rbp7', 'Srrm1', 'Zfp668', 'Gnb1', 'Zfp609', 'Gatad2a', 'Eif4enif1', 'Bptf', 'Txlng', 'Ankhd1', 'Ddx27', 'Hnrnpf', 'Clip1', 'Stat5b', 'Gtf3c2', 'Arid4b', 'Phactr4', 'Rad52', 'Stag2', 'Srsf3', 'Zmym5', 'Tle2', 'Abca3', 'Cse1l', 'Cnot4', 'Uba7', 'Fus', 'Psmd8', 'Chn1', 'Mettl16', 'Tnpo3', 'Atxn2', 'Sp1'…	180	4
Rest	['Eif3f', 'Dhx16', 'Asf1a', 'Dgcr14', 'Rpl5', 'Haus7', 'G3bp1', 'Nle1', 'Sufu', 'Exog', 'Rrp9', 'Rpl36', 'Adprhl2', 'Chst15', 'Zfp341', 'Slc25a38', 'Cab39', 'Lrrc59', 'Fam175a', 'Rnf2', 'Eif3d', 'Dlgap4', 'Chd1l', 'Fanci', 'Wipf2', 'Lmo4', 'Dek', 'Pinx1', 'Eif4a1', 'Gnl3l', 'Fiz1', 'Exosc2', 'Med25', 'Sf3b4', 'Nfkbib', 'Nsf', 'Phf12', 'Nrf1', 'Brd4', 'Zfp207', 'Rpl13a', 'Rer1', 'Hcfc1', '1810013L…	169	4
Arid3a	['Pik3cg', 'Camp', 'Lims1', 'Pan3', 'Mctp1', 'Tnni2', 'Bin3', 'Tlr4', 'Zmynd8', 'Hmgn2', 'Itgal', 'Dapp1', 'Arhgap25', 'Sash3', 'Rac2', 'Samsn1', 'Fhl3', 'Tgif2', 'Clec10a', 'Rnase6', 'Zfp710', 'Arhgap30', 'Laptm5', 'Cd68', 'Ptprc', 'Gpsm3', 'Rhog', 'Tmem206', 'Ncf2', 'Phf8', 'Wdr26', 'Ncf4', 'Lmo4', 'Rffl', 'Arap1', 'Ms4a6b', 'B430306N03Rik', 'Rhobtb1', 'Tmem119', 'Fcrla', 'Syne1', 'Cxcr2', 'Rin…	150	4
Rara	['Phactr2', 'Rock1', 'Fcgr4', 'Rap2c', 'Ltb', 'Nckap1l', 'Lcp2', 'Mogat2', 'Pik3r5', 'Vwf', 'Mefv', 'Satb1', 'Csf3r', 'Plaur', 'Irf1', 'Hcst', 'Kti12', 'Siglece', 'Tmem51', 'Pglyrp1', 'Pilrb1', 'Slc9a3r1', 'Kctd1', 'Cytl1', 'Cyld', 'Nedd9', 'Rinl', 'Lrg1', 'Ednra', 'Cd14', 'Mark2', 'Alkbh3', 'Ccl4', 'Ino80e', 'Sh3bgrl', 'Sirpa', 'B430306N03Rik', 'Adcy3', 'Kdelc1', 'Pstpip1', 'Junb', 'Kdm6b', 'Rbm…	134	4
Gtf2b	['Gsk3b', 'H3f3b', 'Arid4a', 'Wbp1', 'Pin1', 'Rhof', 'Mis12', 'Mxd4', 'Nubp2', 'Ccng2', 'Armc1', 'Tle2', 'Rbm4', 'Dusp10', 'Sp2', 'Tnrc6b', 'Kpna4', 'Far1', 'Zfp687', 'Yif1a', '0610007P14Rik', 'Hnrnpr', 'Tle4', 'Mphosph9', 'Acin1', 'Sesn2', 'Atxn2l', 'Kpnb1', 'Gtf2e1', 'Cdc6', 'Ldb1', 'Dnm2', 'Pcna', 'Usp1', 'Gbf1', 'Calr', '2610318N02Rik', 'Tmem108', 'Mpp7', 'Ercc8', 'Hist3h2a', 'Nudcd2', 'Srf',…	129	4
Sp3	['Gpbp1', 'Taf6', 'Dnajc13', 'Tjap1', 'Kdm6a', 'Rer1', 'Rps6ka3', 'Pcgf1', 'Timm22', 'Nucb1', 'Akt1', 'Sp1', 'A430005L14Rik', 'Mtmr3', 'Hist1h1e', 'Golga3', 'Abhd8', 'Mtr', 'Ints8', 'Tmem131', 'Stag2', 'Tbc1d20', 'Anks1', 'Atg10', 'Wipf2', 'Ppp2r1b', 'Fbxo42', 'Axin1', 'Sp3', 'Hpcal1', 'Scyl2', 'Nrf1', 'Zfp672', 'Pnrc2', 'Luc7l2', 'Hivep1', 'Acsl5', 'Hprt', 'Cndp2', 'Brd4', 'Fchsd1', 'Slc41a2', '…	128	4
Cebpz	['Maf', 'Gigyf1', 'Sirt4', 'Rcc2', 'Mga', 'Zfp618', 'Wdr81', 'Dhx8', 'Zfp592', 'Slc7a7', 'Cse1l', 'Rps6kb1', 'Rbm25', 'Bcor', 'Nol6', 'Pik3cd', 'Mettl16', 'Mettl3', 'Aif1', 'Eif4enif1', 'Itch', 'Slc16a6', 'Rad52', 'Chd7', 'Upf2', 'Pafah1b2', 'Rsl1d1', 'Ubap1', 'Ap1g1', 'Wdr12', 'Zbtb33', 'Kdm2b', 'Pafah1b1', 'Sympk', 'Msl2', 'Pgd', 'Aff4', 'Ube2l3', 'Appbp2', 'Arid2', 'Zfp740', '1700008J07Rik', '…	115	4
Gmeb2	['Ythdc1', 'Ddx3x', 'Kdm2b', 'Pard6a', 'Ell2', 'Vprbp', 'Lmbr1', 'Rbm15b', 'Gak', 'Hexim1', 'Tbcel', 'Atl1', 'Rbks', 'Pde7a', 'Plod2', 'Xpo7', 'Rab21', 'Leng8', 'Zdbf2', 'Pgam1', 'Lrrc8a', '1700084E18Rik', 'Phf20l1', 'Ppig', 'Hnrnpul1', 'Slc35e1', 'Slc25a36', 'Nek1', 'Rabgef1', 'Cep57l1', 'Ccnh', 'Cpeb2', 'Fnip2', 'Topors', 'Zfp335', 'Nrn1', 'Brca1', 'Ubn1', 'Trp53inp2', 'Fam71e1', 'Uba52', 'D230…	114	4
Eomes	['Ccl4', 'Ppm1j', 'Nbea', 'Podxl2', 'Btbd3', 'Sh2d1a', 'Nrg1', 'Meg3', 'Psd3', 'Il7r', 'Nkg7', 'Atp6v0a1', 'Doc2g', 'Tceal3', 'Xcl1', 'Efhd2', 'Tac1', 'Fgf13', 'Ptpn4', 'Cpne5', 'Cd160', 'Hirip3', 'Tmco4', 'Gnl3l', 'Stat4', 'Ntrk3', 'Tagap', 'Sema4a', 'Txk', 'Sec22c', 'Fyn', 'Ahi1', 'Zfp385b', 'Ccr2', 'Hsd11b1', 'Zdhhc15', 'Tmem71', 'Prkch', 'Cd247', 'Trp53bp1', 'Slc12a6', 'Hopx', 'Enox1', 'Dusp5…	101	4
Stat5a	['Rab13', 'Bcl6', 'Tle3', 'Kdm3a', 'Cnot4', 'Ino80b', 'Etv6', 'Stat5a', 'Mbtd1', 'BC005537', 'Zfp286', 'Icam1', 'Maff', 'Ada', 'Muc1', 'Tead3', 'Wipf1', 'Nup153', 'Rpf2', 'Lmnb1', 'Anks1', 'Nr1h2', 'Dbp', 'Scnm1', 'Med29', 'Dnaja1', 'Vps53', 'Pars2', 'Rps27a', 'Klf1', 'Gadd45b', 'Serp1', 'Ankrd28', 'Chad', 'Cog3', 'Phf23', 'Nav2', 'Mbd1', 'Sav1', 'Myd88', 'Akt2', 'Egr2', 'Mmachc', 'Med19', 'Rpl34…	81	4
Pou2af1	['Rel', 'Bcl11a', 'Ebf1', 'Ralgps2', 'Dok3', 'Cd55', 'Foxp1', 'Spib', 'Cd79b', 'Bach2', 'B3gnt5', 'H3f3a', 'Il12a', 'Zfp428', 'Egln2', 'Pim2', 'Pou2f1', 'Cd180', 'Prkcb', 'Hspa2', 'Mef2d', 'Csk', 'Cables2', '2900060B14Rik', 'Itpr3', 'Ptpn6', 'Abi3', 'Foxp4', 'Kctd12', 'Hdac9', 'Lyn', 'Zc3h12a', 'Arhgap25', 'Polm', 'Pipox', 'Sh2b3', 'Ing1', 'Zhx2', 'St6gal1', 'Grk6', 'Pim1', 'Nsf', 'Pan2', 'Ptpn7'…	65	4
Nfe2	['Mmp9', 'Padi4', 'Tmem40', 'Hk3', 'Zyx', 'Glrx', 'Mmp8', 'Pygl', 'Osm', 'Mctp1', 'Mpo', 'Rab44', 'Rasgrp4', 'Rab38', 'Slc2a3', 'Il1f9', 'S100a9', '1110008F13Rik', 'Trem3', 'Fchsd1', 'Apobr', 'Olr1', 'Vav3', 'Vasp', 'Slc7a11', 'Mxd1', 'Vill', 'Nfe2', 'Ncf2', 'Camp', 'Runx2', 'Plcb2', 'Cebpe', 'Flot1', 'Srgn', 'Sap30', 'Msra', '1700020L24Rik', 'Ampd2', 'Mafg', 'Gnb2', 'Cpt1a', 'Fbxo10', 'Aldh3b1',…	64	4
Batf	['Parp8', 'Ccr2', 'Dpep2', 'Fxyd5', 'Tgif2', 'Ccl4', 'Cst7', 'Il1rl1', 'Tnf', 'Stat5a', 'Irf9', 'Mkl1', 'Hcst', 'Vps37b', 'Rnf166', 'Traf1', 'Gzmb', 'Emp3', 'Emb', 'Runx2', 'Bcl2a1d', 'Dok2', 'Cxcr6', 'Rap1b', 'Runx3', 'Pim1', 'Lsp1', 'Cd244', 'Cotl1']	29	4
Stat5b	['Cd4', 'Cd247', 'Stat5b', 'Txk', 'Skap1', 'Bcl11b', 'Phospho2', 'Det1', 'Zfp260', 'Efr3a', 'Camkk1', 'H13', 'Vamp1', 'Itk', 'Dusp10', 'Shkbp1', 'Mmachc', '4930430F08Rik', 'Rpain', 'Ogfod1', 'Dcun1d4']	21	4
Gmeb1	['Tiprl', 'Clk4', 'Srrm2', 'Sppl3', 'Glyr1', 'Rbm26', 'Cebpz', 'Rbm12', '4930430F08Rik', 'Lmbr1l', 'Nop2', 'Tmub2', 'Bbs4', 'Arid2', 'Senp3', 'E2f3', 'Cnot6', 'Atg7', 'Kpna3']	19	4
Tcf7	['Satb1', 'Bcl11b', 'Cd247', 'Ssbp2', 'Gata3', 'Lef1', 'Skap1', 'Tox', 'Cd28', 'Itk', 'Sla2', 'Sh2d1a', 'Tcf7', 'Prkcq', 'Cd4', 'Znrf3', 'Ccr9']	17	4
Stat6	['Arpc2', 'Klf3', 'Lman2', 'Ostc', 'Ccdc30', 'Tmod3', 'B4galt3', 'Tbc1d24', 'Mtif3', 'Ube2w', 'Rnf6', 'Dpagt1', 'Acsl5', 'Sertad2', 'Homez']	15	4
Nr3c1	['Gtf2a1', 'Rgs5', 'Foxs1', 'Spred2', 'Dscr3', 'Mef2a', 'Mxd4', 'Ncoa6', 'Phf21a', 'Gab2', 'Ezh1', 'Dpy19l4', 'C2cd2']	13	4
Patz1	['Nlk', 'Fig4', 'Zfp319', 'Tbc1d17', 'Lin52', 'Zfp219', 'Tmub2', 'Isca2', 'Dgcr2', 'Brd7', 'Spata24', 'Klhdc3', 'Cbfa2t2']	13	4
Sp4	['Hoxb4', 'Sp4', 'Cbx8', 'Atxn7l3', 'Jak2', 'Mex3b', 'Amhr2', 'Tcea2', 'Riiad1', 'Kctd18', 'Tbc1d24', 'Bahcc1']	12	4
Hsf1	['Kptn', 'Ano1', 'St13', 'Tomm40l', 'Dync1i2', 'Bub3', 'Invs', 'Zfp62', 'Mmp13', 'Spata1', 'A430005L14Rik']	11	4
Lef1	['Ablim1', 'Skap1', 'Agfg1', 'Satb1', 'Il7r', 'Bcl11b', 'Cd96', 'Tox', 'Peli1', 'Slc16a1', 'Itk']	11	4
Rxrb	['B330016D10Rik', 'Spen', 'Nr2c2', 'Ankrd11', 'Rxrb', 'Zfp286', 'BC003965', 'Picalm', 'Exog', 'Zfp668']	10	4
Mef2d	['Mef2d', 'Bcl9l', 'Wdr82', 'Med13', 'Endou', 'Kdm6a', 'Tbl1x', 'Nedd4l', 'Ncoa5']	9	4
Foxp1	['Foxp1', 'Cd55', 'Ebf1', 'Cd79b', 'Pou2af1', 'Ms4a1']	6	4
Tcf12	['Trub1', 'Rabggta', 'Gosr2', 'Hivep3']	4	4
Gata2	['Itga6', 'Hhex', 'Klf2', 'Pan3', 'Mecom', 'Plxna2', 'Calm1', 'Sh2b3', 'Fli1', 'Tspan13', 'Lmo2', 'Hdac7', 'Mylip', 'Mgll', 'Impdh2', 'Bmpr2', 'Mat2a', 'S100pbp', 'Prkg1', 'Nrp2', 'Pop5', 'Tmem88', 'Sumo3', 'Ctnnb1', 'Fermt2', 'Ace', 'Ctnna1', 'P2rx1', 'Kank3', 'Patz1', 'Nos3', 'Nrarp', 'Cdkn1a', 'Slc16a13', 'Itga2b', 'Cnn2', 'Cdkn1c', 'Rnf2', 'Baiap2', 'Plvap', 'Gnaq', 'Atp11c', 'Ndrg1', 'Grasp'…	758	5
Sox2	['Acsbg1', 'Sox2', 'Chn2', 'Plp1', 'Ntrk2', 'Rtkn', 'Edil3', 'Gpm6a', 'Tmeff1', 'Agpat4', 'Ttll7', 'Cmtm5', 'Sgk1', 'Igfbp2', 'Rtn4', 'Tagln3', 'Sh3gl3', 'Psat1', 'Efnb3', 'Cpox', 'Megf9', 'Aplp1', 'Arhgef19', 'Cnp', 'Dpysl5', 'Fxr2', 'Tubb3', 'Pdik1l', 'Ylpm1', 'Map4k5', 'Gdpd5', 'Nrarp', 'Etv4', 'Sox6', 'Tubb2b', 'Klhl5', 'Stmn1', 'Kif1b', 'Slc25a29', 'Map4k4', 'Pcyt1b', 'Slc7a11', 'Gpr19', 'Tm…	690	5
Tal1	['Fli1', 'Lmo2', 'Plvap', 'Nrp2', 'Pacsin2', 'Sh2b3', 'Phactr2', 'Cbfa2t3', 'Egfl7', 'Myct1', 'Sox17', 'Itga6', 'Stox2', 'Stab1', 'Rapgef2', 'Zmiz1', 'Sgk1', 'Tnfrsf1a', 'Icam2', 'Lyve1', 'Klhl6', 'Lims1', 'Rgs18', 'Fmo1', 'Arhgef2', 'Slc39a8', 'Edn1', 'Sorbs3', 'Dusp6', 'Kdelc1', 'G6pc3', 'Pcp4l1', 'Epor', 'Guca1a', 'Espl1', 'A630072M18Rik', 'Gcnt2', 'Cdh5', 'Scoc', 'Srsf2', 'Nlk', 'Ivns1abp', '…	184	5
Tead4	['Tpm1', 'Tspan13', 'Sgk1', 'Bmpr2', 'Ctnna1', 'Tmem88', 'Amotl2', 'Sympk', 'Trim8', 'Kti12', 'Lmo7', 'Atxn1', 'Dusp6', 'Cyr61', 'Msrb3', 'Ablim1', 'Calm1', 'Upp1', 'Wwc2', 'Fam171a2', 'Ppfibp1', 'Klf2', 'Phactr2', 'Pcp4l1', 'Strn', 'Sptlc2', 'Rai14', 'Cxcl9', 'Magi1', 'Tsc22d1', 'Cse1l', 'Pcsk5', 'Bcl2a1d', 'Dok4', 'Rac1', 'Tinagl1', 'Fibin', 'Ccnd1', 'Cdkn1a', 'Pls3', 'Emp1', 'Cytl1', 'Sec14l1'…	162	5
Taf7	['Tra2b', 'Ddx5', 'Arid2', 'Rsrc2', 'Hmgxb4', 'Fbxo42', 'Ppp2ca', 'Zfc3h1', 'Ncor1', 'Zhx1', 'Mcmbp', 'Sec23ip', 'Dedd', 'Asf1a', 'Tet2', 'Clk4', 'U2af2', 'Ptbp1', 'Nsd1', 'Unc119b', 'Zfp507', 'Ubn2', 'Trmt12', 'Usp38', 'Hspa8', 'Dap3', 'Med1', 'Taf3', 'Huwe1', 'Rbm25', 'Srsf2', 'Zbtb22', 'Gpr65', 'Cnot2', 'Ppp1r10', 'Cd6', 'Rab1b', 'Map2k5', 'Arf1', 'Malat1', 'Zfp207', 'Magi1', 'Pnrc2', 'Bach1',…	135	5
Foxo3	['Foxo3', 'Hoxc6', 'Ypel2', 'Fbxo32', 'Fbxl3', 'Zfp217', 'Rps6ka3', 'Sp3', 'Plxnb2', 'Elf4', 'Ablim1', 'Kcnk5', 'Luc7l2', 'Atg2a', 'Zfyve1', 'Gcnt1', 'Kdm5b', 'Itpr3', 'Prlr', 'Shroom3', 'Zfyve16', 'Erbb3', 'Klf4', 'Setd7', 'Acsl3', 'Utp14b', 'Rasgef1b', 'Pi4kb', '2300009A05Rik', 'Ncald', 'Col27a1', 'Tcf7l2', 'Trp53inp1', 'Fryl', 'H2afy2', 'Cnksr3', 'Daam1', 'Neo1', 'Sertad2', 'Ctnnd1', 'Ocln', '…	131	5
Atf7	['D3Ertd751e', 'Recql4', 'Slc38a6', 'Vps37a', 'Ap1g1', 'Dnttip1', 'Klhl12', 'Top2b', 'Atl3', 'Wars2', 'Dnm3os', 'Tmem165', 'Pphln1', 'Pcif1', 'Tslp', 'Snapc5', 'Creld1', 'Rela', 'Tpd52l2', 'Slc10a3', 'Gnl1', 'Ddx42', 'Gtf2a1', 'B3gat3', 'Klhl13', 'Tapt1', 'Cbx4', 'Socs4', 'Fbxo28', 'Naa30', 'Polb', 'Mapk8ip3', 'Cars', 'Rlim', 'Tars', 'Helz', '2610301B20Rik', 'Bicd2', 'Cbx6', 'Lclat1', 'Zbed3', 'T…	51	5
Klf1	['Tnks1bp1', 'Rara', 'Psmg1', 'Znhit6', 'Apoc1', 'Mov10', 'Bcs1l', 'Atp5sl', 'Nipsnap1', 'Mogat2', 'Nrn1', 'Hmbs', 'Ttc36', 'Pipox', 'Apoa2', 'Pafah2', 'Ece2', 'Car3', 'Agpat2']	19	5
Pbx3	['Ppp4r1l-ps', 'Wfs1', 'Elmo2', 'Ero1lb', 'Lrfn4', 'Senp8', 'Col2a1', 'Zmiz1', 'Phka2', 'Maml1', 'Amd1', 'Kdm4b', 'Ercc2', 'Fbxo18', 'Mnt']	15	5
Pknox1	['D430042O09Rik', 'Glyr1', 'Cyb5d2', 'Bcl2l13', 'Dennd5a', 'U2af1l4', 'Ppp2r2d', 'Rbm12', 'Slc38a6']	9	5
Snai3	['Ikzf2', 'Snai3', 'Mctp1', 'Bmp7', 'Hoxa7', 'Areg', 'Sec23a']	7	5
Hdac2	['Rhebl1', 'Hmgb1', 'Tbl1x', 'Ssbp3', 'Dda1']	5	5
Foxk1	['Dhx8', 'Ppp4r1', 'Scly', 'Ddi2']	4	5
Ar	-	-	-
Bach2	-	-	-
Bptf	-	-	-
Elf5	-	-	-
Etv1	-	-	-
Fhl2	-	-	-
Foxm1	-	-	-
Foxp4	-	-	-
Gli3	-	-	-
Gtf2i	-	-	-
Gtf2ird1	-	-	-
Hdac1	-	-	-
Hivep1	-	-	-
Hivep2	-	-	-
Hmga1	-	-	-
Hmgb1	-	-	-
Hoxa10	-	-	-
Hoxb8	-	-	-
Klf13	-	-	-
Lhx2	-	-	-
Max	-	-	-
Meis1	-	-	-
Msx2	-	-	-
Mxd1	-	-	-
Nfatc1	-	-	-
Nfatc3	-	-	-
Nr6a1	-	-	-
Pitx1	-	-	-
Pou3f1	-	-	-
Rfx1	-	-	-
Rfxank	-	-	-
Rfxap	-	-	-
Sall2	-	-	-
Sox6	-	-	-
Sox9	-	-	-
Sp100	-	-	-
Stat4	-	-	-
Tbx3	-	-	-
Tead1	-	-	-
Tfcp2	-	-	-
Thra	-	-	-
Vdr	-	-	-
Vezf1	-	-	-
Ybx1	-	-	-
Zbtb17	-	-	-
Zfpm1	-	-	-
Klf4	['Cast', 'Blvrb', 'Rell1', 'Efnb1', 'Arl4a', 'Emp1', 'Tagln2', 'Mtmr11', 'Zmym5', 'Raf1', 'Nek8', 'Hexim1', 'Slain2', 'Nfkbia', 'Klf3', 'Dynll1', 'Edn1', 'Hist1h4c', 'Plk2', 'Ahnak', 'Plec', 'Tuft1', 'Pmp22', 'Sertad1', 'Hist1h4b', 'Iqgap1', 'Id1', 'Nedd9', 'Cadm3', 'Apoc1', 'Rhoa', 'Stim2', 'Tmem220', 'Nhsl1', 'Ralbp1', 'St8sia4', 'Shoc2', 'Fus', 'Gtpbp2', 'Anxa2', 'Pkn2', 'Arhgap27', 'Rnd3', 'P…	720	NA
Runx2	['Runx3', 'Gpr171', 'Xcl1', 'Cd160', 'Rgs1', 'Aqp9', 'Mmp9', 'Stap1', 'Gda', 'Acap1', 'Memo1', 'Lat', 'Mpo', 'Batf', 'Clec4e', 'Tiam2', 'St7', 'Ccl3', 'Tom1', 'Ltb4r1', 'Haus1', 'Runx2', 'Dok2', 'Igfbp4', 'Ptpn22', 'Gzmb', 'Klrk1', '5430427O19Rik', 'Gm11346', 'AU040320', 'Gzma', 'Elmo2', 'H3f3a', 'Aldh3b1', 'Pa2g4', 'Fyb', 'Txk', 'Gsto1', 'Nkg7', 'Sla2', 'Dnajc7', 'Satb1', 'Notch2', 'Klhl5', 'Rex…	515	NA
Klf9	['Thra', 'Hdgf', 'Ccnd2', 'Col1a1', 'Igfbp5', 'Slc4a2', 'Jup', 'Flnc', 'Glis2', 'Sox10', 'Zfp36l1', 'Nlgn2', 'Nfix', 'Rora', 'Cacnb1', 'Vamp2', 'Fosb', 'Rarg', 'Bcl3', 'Junb', 'Sema3b', 'Mmp14', 'Agrn', 'Klf9', 'Tspan31', 'Efnb1', 'Vat1', 'Hic1', 'Arhgap31', 'Tshz3', 'Grasp', 'Kdm6b', 'Adcy6', 'Ncam1', 'Hoxc10', 'Srf', 'Hdac7', 'Lrp1', 'Pcbp4', 'Spry2', 'Vasn', 'Nr2f1', 'Arhgap23', 'Slc45a3', 'Ar…	394	NA
Nfkb1	['Tnfaip3', 'Map3k8', 'Cxcl1', 'Zfp697', 'Pigm', 'Trio', 'Dusp5', 'U2af2', 'Irf1', 'Ifngr2', 'Casp4', 'Dennd4a', 'Il6', 'Psme2', 'Mapk1ip1l', 'Tfpi2', 'Zfp36l2', 'Srsf2', 'Ptpn2', 'Osgin2', 'H2-D1', 'H2-K1', 'Hivep1', 'Rela', 'Ccrl2', 'Nfkbie', 'Uap1', 'Rab27a', 'Rgs1', 'Ccl2', 'Notch2', 'Irf8', 'Bcor', 'Gem', 'Lamtor3', 'Runx2', 'Nfatc1', 'Akap13', 'Cst7', 'Slc10a6', 'Chd9', 'Fkbp5', 'Chic2', 'D…	350	NA
Runx1	['Col11a2', 'Coro1a', 'Kdm6b', 'Dusp5', 'Actr2', 'Arrb2', 'Nckap5l', 'Lrrc25', 'Rasal3', 'Dusp7', 'Pik3r5', 'Ikzf1', 'Sh3bp2', 'Cited2', 'Rnd1', 'Fhl3', 'Hmga1', 'Dennd1c', 'Tlr4', 'Ctsd', 'Skil', 'Acp2', 'Tpm3', 'Cap1', 'Gpc4', 'Cd82', '1700112E06Rik', 'Rab3il1', 'Mapk1ip1l', 'Jakmip1', 'Rlim', 'Psd4', 'Tnip1', 'Prkg1', 'Fblim1', 'Cttnbp2nl', 'Sh3kbp1', 'Sun2', 'Mef2d', 'Il21r', 'Map2k3', 'Lcp2'…	347	NA
Klf10	['Coro1c', 'Dusp5', 'Dkkl1', 'Tnks1bp1', 'Atg2a', 'Hdac3', 'Prdm1', 'Wee1', 'Ccdc107', 'Rps24', 'Tbc1d2', 'Fxyd3', 'Efnb1', 'Ctdsp2', '4921524J17Rik', 'Cnnm4', 'Ddit4', 'Mafk', 'Rusc1', 'Tmem45a', 'Cast', 'Por', 'Slc25a20', 'Slc5a6', 'Acsl4', 'Nab2', 'Stom', 'Eif3b', 'Mrpl33', 'Ippk', 'Foxc2', 'Wasl', 'Tmsb10', 'Myo10', 'Hspa2', 'Mecom', 'Epha2', 'Txnrd1', 'Pnn', 'Nfkb2', 'Lmnb1', 'Ndufv3', 'Emp1…	302	NA
Foxj2	['Mgrn1', 'Grasp', 'Bcl9', 'Nfatc1', 'Rictor', 'Hivep2', 'Mxi1', 'Ano1', 'Zfhx2', 'Sin3a', 'Rbm4b', 'Gbf1', 'Fzd7', 'Pbx3', 'Ahdc1', 'Uhrf2', 'Ptpra', 'Fbxl3', 'Stat5b', 'Kank2', 'Srf', 'Phlpp1', 'Traf3', 'Rab3a', 'Stxbp5', 'Ptch1', 'Tnfrsf19', 'Dennd4a', 'Igf1r', 'Herpud2', 'Zfyve16', 'Nol6', 'Det1', 'Zfp62', 'Myo18a', 'Dcaf8', 'Ctnnb1', 'Zfp329', 'Acvr2a', 'Slc20a2', 'Pld1', 'Lcor', 'P4ha1', 'T…	299	NA
Zbtb7b	['Myh9', 'Vcl', '9930021J03Rik', 'Mepce', 'Cldn3', 'Asb7', 'Sema4a', 'Fam160a2', 'Cast', 'Chd3', 'Luzp1', 'Plec', 'Arhgef19', 'Tpcn1', 'Ikzf2', 'Mmp9', 'Lcorl', 'Rab8a', 'Ccl27a', 'Dnajc4', 'Egln2', 'Itga10', 'Iqgap1', 'Aldoa', 'Zfp524', 'Rarg', 'Zfp217', 'Cnot4', 'Brpf3', 'Tuba4a', 'Bcl11b', 'Avpi1', 'Gpbp1l1', 'Dnmt3b', 'Mtmr11', 'Ssh3', 'Nbeal2', 'Elmo3', 'Arhgap9', 'Ppm1j', 'Plekhh3', 'Tom1l2…	279	NA
Tcf4	['Prrx1', 'Svep1', 'Plp1', 'Fermt2', 'Dkk2', 'Tmem150a', 'Epas1', 'Zfp36l1', 'Mllt6', 'Prdm16', 'Spry4', 'Peli2', 'Meis2', 'Mycn', 'Neurl1b', 'Lims2', 'Igfbp4', 'Ccnyl1', 'Mat2a', 'Glg1', 'Atoh8', 'Ccdc80', 'Id3', 'Gtf2a1', 'Tspan13', 'Klf7', 'Ntf3', 'Olfm1', 'Bin1', 'Sh2b3', 'Ppp3ca', 'Scara3', 'Nr4a1', 'Slco3a1', 'Map4k4', 'Cpne5', 'Klf2', 'Nkd1', 'Dlgap4', 'Aif1l', 'Cdk14', 'Nrarp', 'Tsc22d1',…	278	NA
Twist1	['Dnm3os', 'Dpt', 'C1qtnf1', 'Runx1t1', 'Aoc3', 'Fap', 'Svep1', 'Fhl1', 'Mxra8', 'Pdgfra', 'Dcaf4', 'C1ra', 'Gsn', 'S1pr2', 'Pde1a', 'Ddr2', 'C1qtnf6', 'Itgbl1', 'Mmp2', 'Thbs3', 'Col3a1', 'Aspn', 'Arap1', 'Cpxm1', 'Glt8d2', 'Prrx1', 'Fmod', 'Ptgs2', 'C4b', 'Angptl1', '2700081O15Rik', 'Rcn1', 'C3', 'Vasn', 'Lama4', 'Cd302', 'Prelp', 'Tnfaip6', 'Nid2', 'Emilin1', 'Nfia', 'Ltbp4', 'Lrrn4cl', 'Adamt…	241	NA
Etv5	['Cd14', 'Alcam', 'Lag3', 'Trim8', 'Fcgr1', 'Amhr2', 'Tbxas1', 'Olfml3', 'Tlr4', 'Gnaq', 'Slc16a6', 'Hivep3', 'Zfhx3', 'Lpin2', 'Frmd4a', 'Zfp711', 'Epn3', 'Elovl1', 'Slc9a9', 'Ppfia4', 'Usp2', 'Slc39a8', 'Plxdc2', 'Rreb1', 'Tm9sf4', 'Pip5k1b', 'Tmem119', 'Csf3r', 'Tagap', 'Vsig2', 'Siglece', 'Pacsin2', 'AA986860', 'Ank3', 'Kdm2b', 'Nkd1', 'Wdr81', 'Ccnd1', 'Gpd1', 'Spint1', 'Elmo1', 'G6pc3', 'As…	224	NA
Twist2	['Dnm3os', 'Dpt', 'Serpine1', 'Prelp', 'C1qtnf1', 'Tnfaip6', 'Nid2', 'Apod', 'Runx1t1', 'Aoc3', 'Fap', 'Svep1', 'Fhl1', 'Emilin1', 'Gli3', 'Adcy7', 'Mxra8', 'Pdgfra', 'Nfia', 'Ltbp4', 'Fzd1', 'Wfdc1', 'Il1r1', 'Ltbp1', 'C1ra', 'Gsn', 'Lrrn4cl', 'S1pr2', 'Adamtsl1', 'Pde1a', 'Rhoj', 'Ddr2', 'Add3', 'C1qtnf6', 'Ntrk2', 'Cilp', 'Itgbl1', 'Tgm2', 'Mmp2', 'Thbs3', 'Col3a1', 'Cpxm1', 'Twist2', 'Pcolce'…	214	NA
Tcf7l1	['Prrx1', 'Svep1', 'Epas1', 'Fst', 'Spry4', 'Ccnyl1', 'Ccdc80', 'Nrarp', 'Id3', 'Ranbp1', 'Atoh8', 'Igfbp4', 'Tmem150a', 'Osr1', 'Ccnd2', 'Amotl2', 'Fosb', 'Tpm1', 'Calm1', 'Csrp2', 'Zfp503', 'Penk', 'Prelp', 'Zadh2', 'Ctnna1', 'Ace', 'Actg1', 'Zfp703', 'Tsc22d1', 'Egr1', 'Rspo3', 'Nfib', 'Tcea3', 'Igfbp3', 'Gdf15', 'Fam102b', 'Baiap2', 'Loxl3', 'Cyr61', 'Arhgef5', 'Rbms3', 'Gli3', 'Pcgf2', 'Smad…	213	NA
Klf7	['Sh2b3', 'Srgap2', 'Vcl', 'Add3', 'Cyth2', 'Trim24', 'Luzp1', 'Tsen34', 'Adnp2', 'Sp1', 'Jup', 'Myo10', 'Iqcd', 'Ap3m1', '4921524J17Rik', 'Fam72a', 'Gatsl3', 'Trip10', 'Dgke', 'Rtn3', 'Pgrmc2', 'Rell1', 'Fam126a', 'Pnkd', 'Ddit4', 'Arhgap28', 'Tspan17', 'Micall2', 'Atp1b2', 'Ctnnbip1', 'Clic4', 'Pcbp3', 'Actn4', 'Efnb1', 'Pcgf1', 'Bsdc1', 'Inpp5a', 'Prpf38a', 'Eepd1', 'Rras', 'Ppp2r5d', 'Cpd', '…	197	NA
Meox1	['Svep1', 'Spry4', 'Epas1', 'Lims2', 'Fermt2', 'Klf2', 'Egr1', 'Sntb2', 'Klf7', 'Ace', 'Eln', 'Nrarp', 'Igfbp3', 'Tmem150a', 'Prdm16', 'Amotl2', 'Nbeal1', 'Sspn', 'Atoh8', 'Ddit4', 'Cdk17', 'Plxna2', 'Mycn', 'Armcx3', 'Id3', 'Ccdc80', 'Maff', 'Fbn1', 'Neurl1b', 'Rhob', 'Kifc3', 'Cdk14', 'Chst11', 'Fli1', 'Nrp1', 'Rbfox2', 'Tpm1', 'Gnaq', 'Fn1', 'Tspan13', 'Prkd2', 'Mllt6', 'Jag1', 'Cdkn1c', 'Adam…	196	NA
Nfix	['Ldlrad3', 'Glis2', 'Nfix', 'Apln', 'Jag1', 'Usp2', 'Mmp2', 'Fmod', 'Il11ra1', 'Ilf2', 'Endod1', 'Ralgds', 'Cspg4', 'Csdc2', 'Col12a1', 'Akr1e1', 'Pmepa1', 'Ntrk3', 'Npepps', 'Bgn', 'Sept8', 'Unc5b', 'Tef', 'Ssr3', 'Sv2a', 'Moxd1', 'Efs', 'Fam167a', 'Cdk18', 'Osr1', 'Etv4', 'Bdnf', 'Ptpra', 'Ptn', 'Ltbp2', 'Egfr', 'Cpxm2', 'Mmp16', 'Rhbdf1', 'Acot7', 'Glt8d2', 'Ephb3', 'Rab18', 'Ipo13', 'Pdgfra'…	195	NA
Hif1a	['Pias1', 'Smurf1', 'Atxn2l', 'Snapc1', 'Usp36', 'Kpna1', 'Ccnt2', 'Rnf34', 'Thap2', 'Zfp526', 'Hif1a', 'Pgk1', 'Tbcel', 'Ddx17', 'Clpx', 'Rragc', 'Mbd5', 'Rab5a', 'Cab39', 'Dtnb', 'Vps37a', 'Pip5k1a', 'Igfbp2', 'Zfp384', 'Atp6v1a', 'D230025D16Rik', 'Nrn1', 'Fbxl20', 'Topors', 'Pdzd8', 'Dnajc1', 'Dusp4', 'Tnks2', 'Crkl', 'Abl2', 'Snapc3', 'Klc3', 'Pptc7', 'Hivep3', 'Pafah1b1', 'Hmgxb3', 'Map2k4',…	193	NA
Brf1	['Cyth2', 'Tmem87b', 'Yars', 'Rfxank', 'Aamp', 'Eif2ak1', 'Brf1', 'Tpd52l2', 'Mier2', 'Tinf2', 'Tmem167', 'Cdk2ap1', 'Odf2', 'Wwox', 'Gm527', 'Rngtt', 'Vps26a', 'Diablo', 'Fundc1', 'Yif1b', 'Alg11', 'Rbm4b', 'Opn3', 'Parn', 'Gtpbp1', 'Matr3', 'Nfyc', 'Tia1', 'Pcyox1', 'Ddx27', 'Ino80c', 'Ints8', 'Zfp46', 'Nol12', 'Add1', 'Snrnp70', 'Phldb1', 'Wdr33', 'Sclt1', 'Atoh8', 'Qrich1', 'Pum1', 'Zhx1', 'S…	175	NA
Cux1	['Palm3', 'Mgat5', 'Eif2s3x', 'Ssbp1', 'Ezh2', 'Gabpb1', 'Rc3h1', 'Tdg', 'Cux1', 'Ppp1r14b', 'Rwdd3', 'Rptor', 'Ccnt1', 'Tbk1', 'Gsk3a', 'Atp6v1g1', 'Mettl3', 'Ino80d', 'Cse1l', 'Atl2', 'Ap4s1', 'Rundc1', 'Pif1', 'Mylpf', 'Mrps10', 'Atp13a3', 'Mgea5', 'Sf1', 'Eif2b5', 'Sox4', 'Osbpl8', 'Eif4g1', 'Cbx1', 'Khdrbs1', 'Rcc2', 'Hnrnpc', 'Hmgb1', 'Spag5', 'Emx2', 'Phf21a', 'Srsf3', 'Wdr81', 'Brd4', 'Wd…	166	NA
Jdp2	['Jdp2', 'Slc7a11', 'Dennd5a', 'Zyx', 'Osm', 'Ccl4', 'Hmox1', 'Rgl1', 'S100a9', 'Pilra', 'Dnm3os', 'Pilrb1', 'AI597479', 'Chml', 'Aldh3b1', 'Clec4e', 'Cntln', 'Emp3', 'Kdm6b', '6430548M08Rik', 'Anxa1', 'Nos3', 'Rbpj', 'Mafg', 'Vim', 'Eif5', 'Map3k14', 'Calm1', 'Arap3', 'Zfp651', 'Nin', 'Zeb2', 'Zfp36', 'Olr1', 'Tbkbp1', 'Mrap', 'Samsn1', 'Prdm1', 'Cd44', 'Stk40', 'Zfp516', 'Itga5', 'Tnfrsf1a', 'I…	153	NA
Arnt	['Tbcel', 'Ankrd12', 'Ubn1', 'Cdkn2c', 'Uvrag', 'Pias1', 'Irs1', 'Kcne4', 'Rps6ka4', 'Tet2', 'Lrrc8a', 'Pura', 'Stx4a', 'Fzd7', 'Braf', 'Aff4', 'Eif4g1', 'Igf2r', 'Fam13b', 'Dusp22', 'Bcl6', 'Crispld1', 'Ssr1', 'Ehmt2', 'Mfap1b', 'Phf20l1', 'Sf3b1', 'Rragc', 'Spty2d1', 'Dnajb4', 'D230025D16Rik', 'Hnrnph2', 'Lrfn4', 'Depdc1b', 'Dact1', 'Bex4', 'Stx5a', 'Akap10', 'Tial1', 'Becn1', 'March6', 'Psme4'…	149	NA
Clock	['Gla', 'Mfsd1', 'Mcoln1', 'Arfgef2', 'Tug1', '1810013L24Rik', 'Lats2', 'Eif5a2', 'Rabgap1', 'Tnpo2', 'Dolk', 'Faf1', 'Pdcd6ip', 'Dip2b', 'Ccar1', 'Bptf', 'Pip5k1a', 'Actn2', 'Pkn2', 'Dnmt3a', 'Mms19', 'Pdp1', 'Mbd5', 'Mtm1', 'Cfl2', 'Kcne4', 'Atp6v1a', 'Rabep1', 'Aars', 'Slc25a36', 'Tceal1', 'Lrfn4', 'Eno2', 'Clcn7', 'Thap6', 'Btbd7', 'Nudt9', 'Fnip2', 'Arl2', 'Nckap1', 'Tceal5', 'Megf9', 'Extl2…	144	NA
Zbtb33	['Zzz3', 'Atf2', 'Rmi1', 'Ggnbp2', 'Ncoa4', 'Cox11', 'Tab3', 'Myef2', 'Ift46', 'Usp47', 'Lrsam1', 'Cox7b', 'Ankrd49', 'Daxx', 'Luc7l2', 'Pign', 'Ptch1', 'Tsr1', 'Zmym3', 'Thap1', 'Mau2', 'Pcgf2', 'Snrpg', 'Yy1', 'Nkap', 'Copb2', 'Anapc4', 'Jdp2', 'Zfp827', 'Gas8', 'Mfsd8', 'Rbfox2', 'Fbxo42', 'Slc5a6', 'Kbtbd7', 'Stag2', 'Rnf44', 'Zcchc14', 'Kdm5b', 'Phf8', 'Pabpc4', 'Pcx', 'Sphk2', 'Tdrkh', 'Itc…	132	NA
Six1	['Samd4', 'Prrx1', 'Tmem150a', 'Gadd45b', 'Prelp', 'Map4k4', 'Fosb', 'Dlg4', 'Ccdc80', 'Fst', 'Mat2a', 'Penk', 'Nova1', 'Celf2', 'Fbn1', 'Nfkbiz', 'Utp18', 'Hivep2', 'Ccnyl1', 'Errfi1', 'Cdk14', 'Deptor', 'Fn1', 'Irf1', 'Plxdc2', 'Sspn', 'Col11a2', 'Nr4a1', 'Sox11', 'Vprbp', 'Ankrd28', 'Boc', 'Vgll3', 'C1qtnf1', 'Loxl3', 'Numbl', 'Il11ra1', 'Lin7a', 'Sntb2', 'Rspo3', 'Scara3', 'Rtn2', 'Rfx5', 'Fn…	125	NA
Plagl1	['Nr2f2', '9930021J03Rik', 'Bdnf', 'Fkbp10', 'Igfbp5', 'Chad', 'Foxp2', 'Nos3', 'Bhlhe40', 'Cmtm5', 'Sv2a', 'Igf2', 'Hhip', 'Erf', 'Nlgn2', 'Sncaip', 'Tpbg', 'Dcn', 'Acan', 'Nf1', 'Yars', 'Nynrin', 'Sox10', 'Meis2', 'Fn1', 'Col12a1', 'Gprasp2', 'Gas5', '1700025G04Rik', 'Ust', 'Lox', 'Hand2', 'Nr4a2', 'Lzts2', 'Zcchc24', 'Gria3', 'Myc', 'Rora', 'Fam53c', 'Nanos3', 'Dab1', 'Adamts4', 'Morf4l2', 'Pd…	118	NA
Creb1	['Nup133', 'Epc1', 'Bap1', 'Ube2q1', '3830406C13Rik', 'Fam131a', 'Ube4a', 'Trmt2a', 'Smarcad1', 'Armcx2', 'Tceal1', 'Parp2', 'Med27', 'Dscr3', 'Cct4', 'Wdr82', 'Snrnp27', 'Erf', 'Mxi1', 'Creb1', 'Zfp280c', 'Fam178b', 'Sall2', 'Ubl7', 'Trak1', 'Ythdc2', 'Slc38a6', '1700084E18Rik', 'Zfp281', 'Spata7', 'Abce1', 'Hist1h4h', 'Als2', 'Atg5', 'Zfyve27', 'Gtpbp1', 'Ppp2ca', 'Zfp367', 'Bre', 'Cyld', 'Znrd…	111	NA
Atf2	['Fam131a', 'Mmab', 'Sbsn', 'Zbtb33', 'Isl1', 'Ythdf3', 'Dhx40', 'Baz2b', 'Pex12', 'Clcn3', 'Tmem59l', 'Gnb2', 'Tbc1d23', 'Nek1', 'Phip', 'Smarca1', 'Rab21', 'Hivep1', 'Golga3', 'Usp9x', 'Srrm2', 'St13', 'Pura', 'Hnrnpu', 'Birc2', 'Dctn1', 'Zdbf2', 'Spata7', 'Ccdc124', 'Slc35b1', 'Nemf', 'Zfp574', 'BC031181', 'Fbxw7', 'Hsph1', 'Mpped2', 'Mettl4', 'Nap1l5', 'Ubap2l', 'Rab3a', 'Pitpnm2', 'Stag1', '…	100	NA
Erf	['Extl3', 'Ss18', 'Wdr26', 'Dusp6', 'Sptlc2', 'Tmem101', 'Smug1', 'Fbxw11', 'Slc39a6', 'Ppid', 'Crk', 'Cops7a', 'Cggbp1', 'Rnf185', 'Stoml2', 'Shoc2', 'Arl5b', 'Prkab1', 'Psmd6', 'Lyrm7', 'Lztfl1', 'Smu1', 'Ipo4', 'Tgif2', 'Skil', 'Kdelc1', 'Cradd', 'Sgk1', 'Yes1', 'Mtor', 'Acbd5', 'Spint1', 'Prpf3', 'Necap1', 'Lrrc41', 'Faf2', 'Gas2', 'Acvr1', 'Cars', 'Tmem33', 'Yipf5', 'Yars', 'Aph1a', 'Mrpl38'…	91	NA
Meis2	['Ric8b', 'Chpf', 'Tmem39a', 'Mycbpap', 'Ncald', 'Creb3l2', 'Spata7', 'Ptpru', 'Fam71e1', 'Foxp2', 'Peg3', 'Ift81', 'Zdbf2', 'Isl1', 'Meg3', 'Srpr', 'Pura', 'Spag4', 'Habp4', 'Ptpn21', 'Sec23b', 'Klhl13', 'Prkce', '1700029J07Rik', 'Socs7', 'Mpped2', 'Trp53bp1', 'Myo7a', 'Pamr1', 'Braf', 'Tmem59l', 'Myh10', 'Pard6a', 'Btbd9', 'Ltbp1', 'Lekr1', 'Zfp523', 'Gabarapl1', 'Psd3', 'Camk2n2', 'Dnajb4', 'H…	79	NA
Prdm1	['Cdipt', 'Zmiz1', 'Fam117b', 'Ctbp2', 'Mov10', 'Mmp13', 'Naif1', 'Arhgef3', 'Shoc2', 'Zbtb42', 'F11r', 'Zfp296', 'Etv3', 'Skil', '1700112E06Rik', 'Tlr4', 'Lrrk1', 'Hfe', 'Stx7', 'Ankrd44', 'Csf1r', 'Eng', 'Klf16', 'Zfp385a', 'Prdm1', 'Cd68', 'Cxcr3', 'Osbpl11', 'Ldb1', 'Ddx3y', 'Fmnl3', 'Slco2b1', 'Fam168a', 'Numb', 'Ptprm', 'Ppm1j', 'Mrc1', 'Cttnbp2nl', 'Nedd9', 'Acvrl1', 'Fam110a', 'Mylk', 'Cc…	62	NA
Cnot3	['Ubap2l', 'Ddx6', 'Tnrc18', 'Sart3', 'Phf12', 'Kdm6a', 'Xpo1', 'Hnrnpul1', 'Pnrc2', 'Lrrc51', 'Runx1t1', 'Azi2', 'Hist2h4', 'Nr2f1', 'Agbl5', 'Zmynd8', 'Camkk2', 'Tal1', 'Kpnb1', 'Zfp768', 'Cdkn1b', 'Asxl2', 'Tmem131', 'Ddx17', 'Ehmt2', 'Ing2', 'Zbtb7b', 'Khdrbs1', 'Pabpn1', 'Mta3', 'Cdc73', 'Pip5k1b', 'Wac', 'Scaf11', 'N4bp1', 'Cbll1', 'Fip1l1', 'Cnot3', 'Galk2', 'Vps13a', 'Gpr137', 'Chic2', 'Z…	54	NA
Rb1	['Srsf1', 'Smc3', 'Hist1h2bj', 'Hist1h2ag', 'Fryl', 'Nipbl', 'Dcaf6', 'Sdccag8', 'Zcchc6', 'Wdr44', 'Stk10', 'Ralgapa2', 'Ubap2l', 'Mrpl37', 'Sertad2', 'Ehbp1', 'Mmgt1', 'Mau2', 'Arl3', 'Rb1', 'Nubp1', 'Ctdspl2', 'Snrk', 'Hist1h3i', 'Pkp4', 'Abi1', 'Nup50', 'Hltf', '2510009E07Rik', 'Mink1', 'Abl1', 'Zfp553', 'Lrrc58', 'Sox2', 'Kif11', 'Khnyn', 'Phf23', 'Tnks2', 'Zbtb10', 'Acbd7', 'Osbpl2', 'Zw10'…	53	NA
Creb3l4	['Tspan13', 'Sytl1', 'Eml2', 'Hook1', 'Sema5a', 'Golgb1', 'Kdelr2', 'Kdelr3', 'Qsox2', 'Tm9sf3', 'Pkdcc', 'Cyb561', 'Galnt3', 'Mrps31', 'Ptprf', 'Pdia5', 'Sdcbp2', 'Efnb1', 'Comtd1', 'Rorc', 'Src', 'Cant1', 'Prkg2', 'Prss8', 'Slc26a2', 'Gfpt1', 'B4galt4', 'Pitx2', 'Ephb3', 'Rrbp1', 'Smagp', 'Slc37a1', 'Galnt6', 'Scamp2', 'Txndc5', 'Htatip2', 'Crls1', 'Nans', 'Ehf', 'Tcf7l2', '1700066B19Rik', 'Cld…	51	NA
Foxq1	['Slc39a8', 'Igf1r', 'Slc38a3', 'Krt23', 'Net1', 'Dusp4', 'Slc14a1', 'Ctse', 'Trim13', 'AI661453', 'Stard10', 'Erbb2', 'Vill', 'Slc39a10', 'Ptpn3', 'Slc5a6', 'Pef1', 'Tnfrsf19', 'Spock2', 'Baiap2l1', 'Tgfa', 'Foxc1', 'Asb4', 'Agfg1', 'Hes1', 'Rnf144b', 'Pgap2', 'Hook2', '1110034G24Rik', 'AU021092', 'Saa3', 'Sgpl1', 'Slc25a33', 'Spag4', 'Ocln', 'Bmp3', 'Slc40a1', 'Nebl']	38	NA
Barx2	['Lmo1', 'Epha1', 'Vangl2', 'Ndufa4l2', 'Pkp3', 'Agap3', 'Plxna2', 'Rarg', '5730559C18Rik', 'Msx2', 'Crlf1', 'Ldlrap1', 'AI661453', 'Casz1', 'Pitx1', 'Lrig3', 'Gm973', 'Dapl1', 'Syne2', 'Chl1', 'Ptpn14', 'Sfn', 'Kctd1', 'Mark4', 'Btbd11', 'Itpr3', 'Dynlt3', 'Kctd15', 'Bcl11b', 'Ephb6', 'Vgll4', 'Gas2l1', 'Tacc2', 'Foxk1']	34	NA
Arntl	['Morc2a', 'Trpm7', 'Txlng', 'Ammecr1l', 'Prpf3', 'Atl2', 'Otub2', 'Pgm2l1', 'Snip1', 'Fam53b', 'Tcf12', 'Nars2', 'Vpreb1', 'Rb1cc1', 'Gnai3', 'Ilf3', 'Asb13', 'Lmo4', 'Pafah1b3', 'Gfra1', 'Cecr2', 'Osbpl9', 'Hcfc2', 'Pask', 'Mettl8', 'Snapc3', 'Rab9', 'Vcpip1', 'Bcl7a', 'Rnf19a', 'Mmadhc']	31	NA
Nr1d1	['Dbp', 'Nr1d1', 'Dstn', 'Erc2', 'Klf9', 'Pard3', 'Daam1', 'Tcte2', 'Strn3', 'Sh3d19', 'Nr1d2', 'Cdk16', 'Pgrmc1', 'Igfbp2', 'Gpc4', 'Bod1', 'Bcas3', 'Clock', 'Psmd1', 'Rcor3', 'Dst', 'Tspan3', 'Tjp2', 'Dock1', 'Cry2', 'Rab9', 'Yap1', 'Tef', 'Mbnl2', 'Tbc1d19', 'Jup']	31	NA
Hand2	['S1pr2', 'Tbx18', 'Thbs2', 'Ccdc80', 'Lefty1', 'Glt8d2', 'Axl', 'Arap1', 'Ddr2', 'Mgp', 'Tgfb3', 'Ddah2', 'Lum', 'Dpt', 'Pde1a', 'Polr3gl', 'Gsn', 'Mdk', 'Parp3', 'B3gnt8', 'Chst14', 'Dcn', 'Plagl1', 'Sfrp2', 'Col3a1', 'Ndufa4l2', 'Acvr1', 'Kazald1', 'Zeb1', 'Ccng2']	30	NA
Ahr	['Arrdc4', 'D17Wsu92e', 'Rbbp8', 'Samd4b', 'Dleu2', 'Ctdp1', 'Zbtb44', 'Pipox', 'Arrb1', 'Slk', 'Ctdsp1', 'Pelo', 'Cyp26b1', 'Chmp2a', 'Ccnd1', 'Wwp1', 'Nrn1', 'Etv3', 'Bcl2a1d', 'Tpt1', 'Gtpbp10']	21	NA
Hoxb4	['Pbx2', 'Hoxa7', 'Bcor', 'Hoxa5', 'Hoxb5', 'Dnajc24', 'Dach1', 'Cnksr3', 'Sgk3', 'Rpia', 'Camkk2', 'Hoxb4', 'Zbtb7b', 'Sp4', '2700081O15Rik', 'Amz2', 'Carf', 'Wipf2', 'Cnot3', 'Ranbp9']	20	NA
Mlx	['Rchy1', 'Hectd3', 'Capn7', 'Fam13b', 'Vps72', 'Pla2g6', 'Prkg2', 'Dennd2d', 'Mlx', 'Rasef', 'Tpcn1', 'Mrpl27', 'Taf6l', 'Map3k12', 'Kdm6a', 'Dennd1b', 'Rnf44', '2410131K14Rik', 'Prkag1']	19	NA
Pbx1	['Meis2', 'Irx3', 'Pbx1', 'Gpc4', 'Dkk2', 'Lmo4', 'Tceal8', 'Nr2f2', 'Dram1', '6430548M08Rik', 'Obsl1', 'Myh10', 'B430306N03Rik', 'Dtd1', 'Meis1', 'Ltbp3', 'Ckap4', 'Gng12', 'Igfbp5']	19	NA
Prrx2	['Ifi205', 'Prrx2', 'Serpinf1', 'Kazald1', 'Col1a1', 'Col14a1', 'Mmp14', 'Fbln1', 'Fn1', 'Bmp1', 'Vcan', 'Gpc3', 'Il6', 'Col1a2', 'Gdf10', 'Mmp2']	16	NA
Nfe2l1	['Hcfc1r1', 'Tsc22d1', 'Nup153', 'Arhgef12', 'Pard6b', 'Flnb', 'Tmem65', 'Pls3', 'Akt3', 'Habp4', '1700028J19Rik', 'Tesc', 'Ensa', 'Specc1l']	14	NA
Pou2f1	['Pou2f1', 'Hdac9', 'Sin3a', 'Ubtf', 'Nek3', 'Otud4', 'Trim68', 'Aars2', 'Poc1b', 'Appbp2', 'Cldn12', 'Dennd1a']	12	NA
Sox5	['Ppp2r2b', 'Mdk', 'Dact3', 'Zfp507', 'St7', 'Eif1b', 'Ift81', 'Hsd11b1', 'Col12a1', 'Dock7', 'Fancf']	11	NA
Hmgb2	['Hist1h1e', 'Hmgb2', 'Cenpf', 'Hist1h1b', 'Mxd3', 'Hist1h1a', 'Plk1', 'Aurkb', 'Aurka', 'Ccnb2']	10	NA
Mnt	['Eif5a2', 'Morc2a', 'Hsf2', 'Mepce', 'Mnt', 'Brdt', 'Dnajc16', 'Dhx37', 'Snrnp48', 'Smndc1']	10	NA
Rbpj	['Zfp516', 'Pid1', 'Dab2', 'Etv3', 'Ccl2', 'Slamf9', 'Gfra2', 'Fam49a', 'Stard8', 'Tgfbi']	10	NA
Rfx2	['Bahd1', 'Tagln2', 'Nfatc2', 'Chl1', 'Nmnat3', 'Rai1', 'Sh3pxd2b', 'Sfmbt1', 'Mnt', 'Zbtb34']	10	NA
Rora	['Arl3', 'Fam20a', 'Nfic', 'Rdx', 'Dnajb4', 'Smarca2', 'Fxyd6', 'Tgfb2', 'Cd99l2', 'Uba3']	10	NA
Pura	['Gnb2', 'Zmynd8', 'Shf', 'Fam46c', 'Lekr1', 'Napa', 'Spred2', 'Malat1', 'Nsmce4a']	9	NA
Tcf3	['C1galt1', 'Siglecg', 'Vpreb1', 'Pafah1b3', 'Cdc25b', 'Cd79b', 'Lrmp', 'Bach2', 'Plekhf2']	9	NA
Zfp668	['Tars2', 'B330016D10Rik', 'Acbd3', 'Prkag1', 'Sdhaf1', 'Ccdc94', '4921524J17Rik', 'Zfp668', 'Gtf3a']	9	NA
Etv4	['Foxj3', 'Slc1a4', 'Chst1', 'Ephb3', 'Etv4', 'Kcnip3', 'Klhl8', 'Etv5']	8	NA
Mecom	['Elf5', 'Tsc22d1', 'Gata6', 'Sdcbp2', 'Qsox1', 'Mecom', 'Gnas', 'Socs2']	8	NA
Nr1h2	['Bre', 'Mospd1', 'Dnajb14', 'St7l', 'Tnik', 'Polrmt', '9130011E15Rik', 'Urb2']	8	NA
Nr2f1	['Vcan', 'Cntfr', 'Nr2f1', 'Rftn2', 'Lpar1', 'Cdh11', 'Gpm6a', 'Sspn']	8	NA
Ovol2	['Crb3', 'Ovol2', 'Epn3', 'Itga3', 'Hook2', 'Tmem184a', 'Casz1']	7	NA

## Sheet: Regulon_MCA
Regulon	GeneComposition(All_atlas_merged)	NumGenes	RegulonModule
Irf1	['Fcgr2b', 'Map3k8', 'Tagap', 'Usp38', 'Dusp5', 'Lpxn', 'Lsp1', 'Plek', 'Cd68', 'Cxcr3', 'Sp100', 'Ccl4', 'Cd74', 'Lcp2', 'Cfp', 'Pold4', 'Mogat2', 'Arhgef3', 'Irf2', 'C1qc', 'Slc15a3', 'Itpkb', 'Bcl2a1b', 'Vcpip1', 'Sh3tc1', 'Bcl2a1a', 'Cd36', 'H2-K2', 'Plxnc1', 'Zbtb7b', 'Gpr183', 'Arhgap30', 'Fbxo11', 'Laptm5', 'Bcl2a1d', 'Pla2g15', '5430427O19Rik', 'Rac1', 'Arf6', 'Pik3r5', 'Pkn1', 'Nrp2', 'H…	1828	1
Crem	['Braf', 'Rfx1', 'Vps37b', 'Cdc14b', 'Rnf44', 'Dusp1', 'Btg1', 'Nup98', 'Nr4a2', 'Arih1', 'Nudt18', 'Tiprl', 'Ell2', 'S1pr2', '1700084E18Rik', 'Josd1', 'Mycbpap', 'Ap2b1', 'Nf1', 'Aig1', 'Ptp4a1', 'Pde7a', 'Lmbr1', 'Klhl12', 'Dhx36', 'Lsm12', 'Ric8b', 'Suv39h2', 'Tcf20', 'Map1lc3a', 'Sidt2', 'Akirin1', 'Zfp523', 'Btbd9', 'Rnf166', 'Gprc5a', 'Cds1', 'Xpnpep3', 'St13', 'Mrps18b', 'Nek1', 'BC049762'…	1623	1
Ets2	['Chd2', 'Tram2', 'Lcp2', 'Rasgrp3', 'Tlr4', 'Tbkbp1', 'Plvap', 'Ctnna1', 'Arhgap31', 'Rasip1', 'Acvr1', 'Mmrn2', 'Cytl1', 'Fcgr4', 'Wdr26', 'Rac1', 'Itgal', 'Tmem204', 'Nfat5', 'Shc1', 'Cd14', 'Gdf15', 'Exoc3l', 'Prickle1', 'Syne1', 'Sgk1', 'Ushbp1', 'Nedd9', 'Sorbs3', 'Kifc3', 'Dusp5', 'Kti12', 'Vwf', 'Phactr2', 'Apold1', 'Pear1', 'Robo4', 'Frmd4a', 'Vcpip1', 'Mark3', 'Fbxo11', '4931406P16Rik',…	1197	1
Cebpb	['Rbp4', 'Cdc42se1', 'Fosb', 'Dram1', 'Pan3', 'Il6ra', 'Epas1', 'Slco2a1', 'Smad6', 'Sema6d', 'Jun', 'Tbx2', 'Jdp2', 'Trim8', 'Ace', 'Brd4', 'Zfp36l2', 'Cadm1', 'Ubash3b', 'Trib1', 'Maf', 'Vim', 'Polr2a', 'Fos', 'Per1', 'Arl4c', 'Lmnb1', 'Plxnc1', 'Kdm6a', 'Ptgs2', 'Nfkbiz', 'Cxcr4', 'Ddx5', 'Chst11', 'Hpse', 'Pparg', 'Col13a1', 'Rhob', 'Tgif1', 'Penk', '1700112E06Rik', 'Chac1', 'Slc43a1', 'Il1rn…	1054	1
Cebpd	['Lcn2', 'Camp', 'Sh2b3', 'Il6ra', 'Dram1', 'Prrx1', 'Actb', 'Dmkn', 'Hsd11b1', 'Ptx3', 'Fam134b', 'Fbxo32', 'Gnas', 'Sftpd', 'Gys1', 'Twist2', 'Nfix', 'Wfdc2', 'Lmo4', 'S100a8', 'Trib1', 'Steap4', 'C3', 'Il1b', 'Adamts5', 'Polr2a', 'Sirpa', '1700112E06Rik', 'Ncam1', 'Tspan13', 'Dcn', 'Osmr', 'Pcp4l1', 'Flot1', 'Fam129b', 'Dbp', 'Cacnb1', 'Tmem63a', 'Hmg20a', 'Mmp8', 'Nek3', 'Mmp9', 'Fbn2', 'Hk3'…	1021	1
Elk3	['Chd2', 'Ss18', 'Rasgrp3', 'Tlr4', 'Tbkbp1', 'Plvap', 'Ctnna1', 'Arhgap31', 'Rasip1', 'Acvr1', 'Mmrn2', '6530402F18Rik', 'Prkacb', 'Zfc3h1', 'Wdr26', 'Arhgef3', 'Rac1', 'Itgal', 'Dnm3os', 'Tmem204', 'Nfat5', 'Shc1', 'Gdf15', 'Exoc3l', 'Prickle1', 'Syne1', 'Arhgap27', 'Sgk1', 'Ushbp1', 'Nedd9', 'Abr', 'Sh3bp2', 'Sorbs3', 'Polr2a', 'Lims1', 'Git1', 'Ythdc1', 'Kti12', 'Zcchc24', 'Vwf', 'Mapre2', 'P…	995	1
Cebpa	['Rbp4', 'Per3', 'Il6ra', 'Smad6', 'Dram1', 'Gys1', 'Per1', 'Wfdc2', 'Jdp2', 'Krt23', 'Trim8', 'Zfp36l2', '1700112E06Rik', 'Slco2a1', 'Kdm6a', 'Pparg', 'Slpi', 'Foxa2', 'Hpse', 'Helz', 'Trak1', 'Nr1h3', 'Prnp', 'Epas1', 'Ftl1', 'Cybb', 'Il6', 'Ccl3', 'Etv5', 'Mid1ip1', 'Sirpa', 'Sdc1', 'Csf3r', 'Trf', 'Ubash3b', 'Ces1d', 'Rhob', 'Per2', 'Larp1', 'Selenbp1', 'Atxn1', 'Pcf11', 'Pan3', 'Sftpd', 'Slc…	797	1
Foxo1	['Nfatc1', 'Ssbp2', 'Nr4a2', 'Prrx1', 'Calm1', 'Fermt2', 'Grem2', 'Glg1', 'Mat2a', 'Foxp2', 'Peli2', 'Sh2b3', 'Phip', 'Foxp1', 'Klf2', 'Ddit4', 'Ccnd2', 'Rnf2', 'Gadd45b', 'Prdm16', 'Smarcd3', 'Klf11', 'Trib2', 'Nr4a1', 'Ppp3ca', 'Chst11', 'Nek7', 'Rnf19b', 'Celf2', 'Junb', 'Hhex', 'Arl4c', 'Zbtb7a', 'Sspn', 'Ppp1cc', 'Ubash3b', 'Arrdc3', 'Irf1', 'Sgk1', 'Hivep2', 'Zfp36l1', 'Zfp36l2', 'Fbxo32', …	649	1
Nfil3	['Il1rn', 'Fbxo32', 'Irf2', 'Ccr2', 'Pycr1', 'Hpse', 'Herpud1', 'Ftl1', 'Vim', 'Lmo4', 'Rnf149', 'Mapk1ip1', 'Pparg', 'Il1b', 'Atf3', 'Pdp2', 'Ddx5', 'Nfkbiz', 'Trem1', 'Nfil3', 'Nupr1', 'Saa3', 'Ehf', 'Dusp4', 'Mmp8', 'Rarres1', 'Klf5', 'Abcb1b', 'Mmp19', 'AI314180', 'Ppp1r15b', 'Mrap', 'Olr1', 'Osgin1', 'Hspb8', 'Tnfaip6', 'Casz1', 'Fig4', 'Slc43a1', 'Actg1', 'Kctd1', 'Kdm2b', 'Actb', 'Hoxa10',…	375	1
Mafg	['Mmp9', 'Padi4', 'Tmem40', 'Cebpe', 'Plp2', 'Vill', 'Plaur', 'Actb', 'Clec5a', 'Ckap4', 'Igsf6', 'Mmp8', 'Tnfrsf21', 'Cd177', 'Pygl', 'Anxa1', 'Grn', 'Nfam1', 'S100a9', 'Dstn', 'Gdpd3', 'Flot1', 'Camp', 'Nfe2', 'Hmox1', 'Itpkc', 'Map2k3', 'Mafg', 'Itgav', 'Ppp2ca', 'Kdm6b', 'Slc2a1', 'Rtn4', 'Tnfrsf1a', 'Srxn1', 'Midn', 'Mdm4', 'Osm', 'Slc11a1', 'Nhsl2', 'Bach1', 'Il11', 'Ehbp1l1', 'Map2k1', 'Fo…	324	1
Bcl3	['Nfkb2', 'Icam1', 'Gngt2', 'Relb', 'Abi3', 'Cxcl2', 'Tank', 'Irf2', 'Alg6', 'Arhgef2', 'Fchsd2', 'Ccl5', 'Neurl3', 'Rap1gap', 'Irf1', 'Ifngr2', 'Casp4', 'Stx11', 'Neat1', 'Fas', 'Ptprj', 'Actr3', 'Psme2', 'Palld', 'Rnf31', 'Myo1c', 'Ccl4', 'Tfpi2', 'Plec', 'Kctd5', 'Il1f9', 'Zfp36l2', 'Sh3gl1', 'Sema4a', 'Ptpn2', 'Sav1', 'Zap70', 'H2-D1', 'H2-K1', 'Jarid2', 'Rasa2', 'Fhod1', 'Dmxl2', 'Ada', 'Nr4…	322	1
Stat3	['Rara', 'Map2k3', 'Kdm6b', 'Junb', 'BC030867', 'Rela', 'Mafg', 'Cd109', 'Ahnak', 'Elk3', 'Lgals3', 'Aff1', 'Zfp36', 'Hbegf', 'Ssfa2', 'Ptp4a2', 'Bach1', 'Map3k14', 'Atp13a3', 'Fam135a', 'Tnfrsf1a', 'Ppp2ca', 'Traf3', 'Abhd2', 'Ifrd1', 'Myo1e', 'Fosl2', 'Jak2', 'Stk40', 'Bcl10', 'Epha2', 'Pim1', 'Zbtb7a', 'Dusp1', 'Rab8b', 'Mafk', 'Sned1', 'Pde4d', 'Zswim6', 'Bhlhe40', 'Rock2', 'Tgif1', 'Fam129b'…	320	1
Mafb	['Svep1', 'Cadm1', 'Trim8', 'Plp1', 'Helz', 'Zfp710', 'Ubash3b', 'Epas1', 'Col13a1', 'Fst', 'Fosb', 'Sh2b3', '2510039O18Rik', 'Dusp6', 'Zfp36l1', 'Itga6', 'Mat2a', 'Rtn4rl1', 'Bhlhe41', 'Gadd45b', 'Calm1', 'Ptprj', 'Arl4c', 'Map4k4', 'Tspan13', 'Ccdc80', 'E2f7', 'Ell', 'Ep300', 'Olfm1', 'Glg1', 'Atp2a2', 'Zfp36l2', 'Zswim6', 'Irx1', 'Hhex', 'Nfkbiz', 'Maf', 'Ctnna1', 'Fxyd2', 'Smad3', 'Sema6d', '…	260	1
Tgif1	['Vps37b', 'Gpbp1', 'Fosb', 'Arg2', 'Hhip', 'Pde7a', 'Pdp1', 'Ythdc2', 'Zfp593', 'Avpi1', 'Tmem39a', 'Sik1', 'Xpnpep3', 'Gem', 'Relb', 'Tra2a', 'Rps29', 'Zbtb11', 'Nek1', 'Usp36', 'Nr4a2', 'Ccnl1', 'Appbp2', 'Gprc5a', 'Tmem86a', 'Xrn2', 'Maff', '9530068E07Rik', 'Taf4b', 'Rcan1', 'Atg5', 'Ppp1r15a', 'Ptpru', 'Bdp1', 'Ctu2', 'Stard3nl', 'Ddx51', 'Adnp2', 'Ing3', 'Pinx1', 'Epha2', 'Arl5b', 'Wsb1', '…	245	1
Tfe3	['Smcr8', 'Atxn3', 'Kdelc1', 'Klf13', '9130011E15Rik', 'Slc25a13', 'Rab5a', 'Hook1', 'Gusb', 'Ddx20', 'Mbd1', 'Stk35', 'Inpp1', 'Golph3', 'Sfmbt1', 'Acer3', 'Tmem110', 'Cnot8', 'Ccdc43', 'Orai1', 'D17Wsu92e', 'Zfp672', 'Pdcd7', 'Ftsj1', 'Blm', 'Gla', 'C1qtnf1', 'Dolk', 'Gnptg', 'Picalm', 'Rpusd4', 'Morc2a', 'Commd8', 'Nptn', 'Rab3a', 'Mafg', 'Vldlr', 'Zbed3', 'Trappc6a', 'Utp20', 'Mospd1', 'Foxp1…	119	1
Rela	['Bbc3', '4930523C07Rik', 'Prpf38b', 'Slc17a9', 'Cc2d1b', 'Snx19', 'Lysmd4', 'Rela', 'Dtwd1', 'A630072M18Rik', 'Ippk', 'Bin3', 'Pyroxd1', 'Arpc2', 'Tbc1d22a', 'Pik3r4', 'Cradd', 'Rer1', 'Rac1', 'Ttpal', 'Kctd5', 'Rgl2', 'Mgat1', 'Ppil2', '1810024B03Rik', 'Kctd10', 'Serp1', 'Pigt', 'C2cd3', 'Invs', 'Map3k7', 'Nek9', 'Spata2', 'Pde12', 'Arfgap1', 'Cggbp1', 'Dpm1', 'Klhl18', 'Wdr1', 'Myo1c', 'Pex6',…	112	1
Sox17	['Tinagl1', 'Gpihbp1', 'Pecam1', 'Notch4', 'Emcn', 'Tie1', 'Rgl1', 'Epas1', 'Cdh5', 'Apold1', 'Myct1', 'Podxl', 'Ushbp1', 'Kitl', 'Sox17', 'Cd93', 'Gpr4', 'Rasip1', 'Nrarp', 'Itga6', 'Snrk', 'Erlin2', 'Smad6', 'Adcy4', 'Nos3', 'Vwf', 'Rasa1', 'Itga1', 'Nfxl1', 'Fam198b', 'Mkl2', 'Lama5', 'Itpkb', 'Cd36', 'Tek', 'Txndc12', 'Ptprb', 'Kifc3', 'Plekho1', 'Clec14a', 'Ipo11', 'Etl4', 'Arhgef5', 'Pcp4l1…	51	1
Bach1	['Ralgapa1', 'Nup98', 'Ptpn11', 'Picalm', 'Dennd5a', 'D17Wsu92e', 'Tug1', 'Rragc', 'Fnip2', 'Srebf2', 'Crebbp', 'Tle4', 'Zmiz1', 'Cul3', 'Camk1d', 'Foxn2', 'Dusp6', 'Vegfa', 'Tet3', 'Ncoa2']	20	1
Mef2a	['Klf7', 'Mef2a', 'Rtn4', 'Rap2b', 'Fbxl17', 'Lrrc8c', 'Nfat5', 'Atp8b2', 'Strn3', 'Gls', 'Plod1', 'Cul3', 'Smox', 'Marcks', 'Elk3', 'Clic4', 'Jmjd1c', 'Papd7', 'Arih1']	19	1
Gata3	['Tspan13', 'Nek7', 'Sox4', 'Bhlhe41', 'Lmo1', 'Wbscr27', 'Inppl1', 'Atp6v1c2', 'Pim2', 'Nrarp', 'Fxyd3', 'Rnf144b', 'Aldh1a7', 'Capsl', 'Fxyd2', 'Elf5', 'Krt19', 'Pop5', 'Ddit4', 'Mllt3', 'Bmp7', 'Deptor', 'Nlrc3', 'Grap2', 'Sdcbp2', 'Hivep3', 'Wnt5a', 'Dnajc12', 'Sfxn3', 'Vill', 'Dennd2d', '8430408G22Rik', 'Anxa8', 'Dusp11', 'Arhgef6', 'Dusp4', 'Tcf7', 'Sprr1a', 'Cldn4', 'Il17re', 'Lat', 'Tmprs…	248	2
Klf16	['Sntb2', 'Atg2a', 'Ubash3b', 'Pkn2', 'Phldb3', 'Uaca', 'Herc1', 'Bmf', 'Nphp3', 'Sec14l2', 'Tjap1', 'Nfkbie', 'Aatf', 'Tmem221']	14	2
Xbp1	['Braf', 'Amdhd2', 'Dusp1', 'Ubap2l', 'Fkbp14', 'Picalm', 'Snx2', 'Gigyf2', 'Sirt1', 'Pdia5', 'Fam134a', 'Kat5', 'Atg3', 'Tmem39a', 'Napa', 'Sec16b', 'Rspry1', 'Gmppb', 'Tspan13', 'Relb', 'Tmem214', 'Mcoln1', 'Scfd1', 'Ssr1', 'Rfx1', 'Arg2', 'Phf20l1', 'Gnptg', 'Uso1', 'Vps37b', 'Rnf44', 'Tmed2', 'Fnip1', 'Rab21', 'Vps33a', 'Ssr4', 'Pdp1', 'Srpr', 'Sec63', 'Ddx42', 'Sec24c', 'Golga1', 'Ccdc47', '…	1945	3
Atf3	['Cbx8', 'Sh2b3', 'Ube2b', 'Llgl2', 'Fosb', 'Plp1', 'Wls', 'Prrx1', 'Fnip2', 'Ptprj', 'Nfatc1', 'Gla', 'Irf2', 'Insig1', 'Pias1', 'Itga6', 'Per3', 'Azin1', 'Calm1', 'Atxn1', 'Cadm1', 'Maff', 'Sez6l2', 'Jdp2', '1190002N15Rik', 'Lbh', 'Ak4', 'Dusp1', 'Picalm', 'Homer2', 'Bhlhe40', 'Nf1', 'Spag9', 'Slc4a4', 'Rb1', 'Cpne5', 'Arl4c', 'Pgrmc2', 'Filip1l', 'Acvr1', 'Ahnak', 'Spock2', 'Ell', 'Bhlhe41', '…	1855	3
Ehf	['Nr1h2', 'Ippk', 'Ppp4c', 'Zfp655', 'Urm1', 'Hspbp1', 'Lypla2', 'Vps52', 'Ss18', 'Cyb561d2', 'Gga1', 'Snrnp27', 'Ap1m1', 'Ppil2', 'Rnf167', 'Edem3', 'Vps33b', 'Rab11a', 'Gnai3', 'Psmb7', 'Slc25a46', 'Yipf4', 'Fbxo28', 'Pyroxd1', 'Pomp', 'Eif3i', 'Serp1', 'Shoc2', 'Pigt', 'Wdr26', 'Rer1', 'Taf1a', 'Srpr', 'Morf4l2', 'Parl', 'Nudt5', 'Atp6v1d', 'Tmed10', 'Txn2', 'Trim35', 'Fermt2', 'Hccs', 'Erlec1…	1330	3
Jun	['Fosb', 'Dusp1', 'Jun', 'Ppp1r15a', 'Klf6', 'Btg2', 'Atf3', 'Zfp36l1', 'Ier2', 'Mafb', 'Egr1', 'Fos', 'Cd164', 'Junb', 'Rhob', 'Hspa5', 'Hes1', 'Zfp36', 'Ubb', 'Golph3', 'Fbxo33', 'Srpr', 'Slc25a36', 'Cltb', 'Hist1h4h', 'Ddx3x', 'Tm9sf3', 'Sdf2', 'Fbxo8', 'Mut', 'Hyou1', 'Brca1', 'Rnf103', 'Rin2', 'Plekhh3', 'Dnajc1', 'Herpud1', 'Wls', 'Atg10', 'Ncstn', 'Edem3', 'Slco2a1', 'Lysmd3', 'Stk19', 'Nd…	1123	3
Fos	['Dusp1', 'Fosb', 'Btg2', 'Jun', 'Egr1', 'Fos', 'Atf3', 'Ier2', 'Klf6', 'Junb', 'Sat1', 'Rgs2', 'Nr4a1', 'Klf2', 'Klf4', 'Zfp36', 'Tmem59l', 'Zfand2b', 'Ppp1r15a', 'Sidt2', 'Recql4', 'Lmo4', 'Zfand5', 'Gabarap', 'Tgfb3', 'Trmt5', 'Phf20l1', 'Atg3', 'Gnptg', 'Brca1', 'Dhx35', 'Psenen', 'Dusp11', 'Hspa5', 'Dnajc1', 'Cln3', 'Herpud1', 'Wls', 'Atp6v0d1', 'Tcn2', 'Mastl', 'Tsc22d3', 'Trps1', 'Arf4', '…	1115	3
Junb	['Vps37b', 'Dusp1', 'Gem', 'Jun', 'Ppp1r15a', 'Btg1', 'Btg2', 'Atf3', 'Zfp36l1', 'Ccnl1', 'Ier2', 'Tnfaip3', 'Fos', 'Egr2', 'Tpt1', 'Junb', 'Sat1', 'Rgs1', 'Rgs2', 'Zfp36l2', 'Nfkbiz', 'Tsc22d3', 'Nr4a1', 'Bcl2a1b', 'Klf2', 'Gadd45b', 'Irf1', 'Zfp36', 'Pim1', 'Myd88', 'Fosb', 'Hhip', 'Filip1l', 'Mxd1', 'Nr4a2', 'Sidt2', 'Relb', 'Sik1', 'Zbtb11', 'Ddx5', 'Recql4', 'Stx5a', 'Zfand5', 'Egr1', 'Sdf2'…	1114	3
Atf4	['Tead1', 'Vps37b', 'Braf', 'Ell2', 'Rbm3', 'Josd1', 'Dok1', 'Jun', 'Gla', 'Mitf', 'Slc7a11', 'Usp36', 'Baz2b', 'Zfand5', 'Tmem39a', 'Zfp593', 'Smarca1', 'Sik1', 'Arih1', 'Gas5', 'Gprc5a', 'Mecr', 'Ccl4', 'Lysmd3', 'Arg2', 'Spred2', 'Nr4a2', 'Insig1', 'Cnnm4', 'Zzef1', 'Ddx3x', 'Pura', 'Heca', 'Chpf', 'Mmgt1', 'Fosl1', 'Herpud1', 'Pck2', 'Rin2', 'Fosb', 'Klf6', 'Inhba', 'Arl5b', 'Rab25', 'Ppp2ca'…	1099	3
Elf3	['Trip4', 'Appl2', 'Fibp', 'Nprl2', 'Cyb561d2', 'Edem3', 'Sec31a', 'Lypla2', 'Slc39a9', 'Arfip1', 'Vps13b', 'Arpc5l', 'Ascc2', 'Arpc1a', 'Vps53', 'Erp44', 'Tsg101', 'Ippk', 'Crb3', 'Tnpo3', 'Sptlc2', 'Cln3', 'Elmo3', 'Hars2', 'Rab11a', 'Spata2', 'Socs4', 'Vps33b', 'Wdr1', 'Pyroxd1', 'Mark2', 'Bcl2l1', 'Fbxo8', 'Tfg', 'Mlycd', 'Twf1', 'Nars', 'Vps41', 'Sec24c', 'Pick1', 'Dalrd3', 'Nudt5', 'Mpzl3',…	1095	3
Fosl1	['Tead1', 'Vps37b', 'Tpm4', 'Ell2', 'Josd1', 'Magoh', 'Pitx2', 'Cbx8', 'Ssr4', 'Usp36', 'Zfp593', 'Arg2', 'Arih1', 'Zfand5', 'Tmem39a', 'Pmvk', 'Filip1l', 'Foxred1', 'Insig1', 'Srpr', 'Nfkb2', 'Ythdc1', 'Nr4a2', 'Hnrnpa2b1', '9530068E07Rik', 'Chpf', 'Fdxacb1', 'Tubb2b', 'Cnnm4', 'Appbp2', 'Rps29', 'Trim39', 'Ldha', 'Dok1', 'Cstf3', 'Tra2a', 'Recql4', 'Scfd1', 'Sik3', 'Lysmd3', 'Nfatc2', 'Arl5b', …	1058	3
Creb3l1	['Ssr1', 'Sema5a', 'Fkbp14', 'Arcn1', 'Rapsn', 'Pdia5', 'Spty2d1', 'Morf4l2', 'Erlec1', 'Ctif', 'Rab3il1', 'Slc17a9', 'Ppib', 'Fkbp10', 'Tmem39a', 'Ostc', 'Scfd1', 'Cpxm1', 'Oaf', 'Stx5a', 'Asph', 'Tmem214', 'Ganab', 'Fnip1', 'Trip6', 'Pitx2', 'Uso1', 'Chsy1', 'Lrig3', 'Tnpo2', 'Fam3c', 'Serf2', 'Sec16b', 'Slc39a13', 'Gmppb', 'Fam167a', 'St3gal1', 'Nme2', 'Ap1s2', 'Aldh18a1', 'Gabarap', 'Fbn2', '…	911	3
Fosb	['Fosb', 'Maff', 'Tmem86a', 'Ppp1r15a', 'Jun', 'Egr1', 'Ccnl1', 'Fos', 'Egr2', 'Atf3', 'Sfrp4', 'Cd164', 'Junb', 'Plk2', 'Hspa5', 'Gja1', 'Nr4a1', 'Gadd45a', 'Tnfaip6', 'Sgk1', 'Sirt1', 'Kdm6a', 'Picalm', 'Tmem39a', 'Slco2a1', 'Fnip2', 'Aldh1a2', 'Bhlhe40', 'Rnf103', 'Mesdc1', 'Rnf19b', 'Per2', 'Trps1', 'Ddx3x', 'Cltc', '1190002N15Rik', 'Uso1', 'D17Wsu92e', 'Prkce', 'Ier5', 'Aff4', 'Zbtb11', 'Top…	838	3
Fosl2	['Sh2b3', 'Sirt1', 'Braf', 'Dusp1', 'Fosb', 'Gla', 'Ube2h', 'Kdm2b', 'Vps37b', 'Dusp5', 'Heg1', 'Zfp335', 'Jdp2', 'Kdm6a', 'Cdc42se1', 'Atf3', 'Dennd5a', 'Calm1', 'Jun', 'Tiprl', 'Creb5', 'Tbx2', 'Picalm', 'Wdr1', 'Hhip', 'Thra', 'Rap1b', 'Ppp2ca', 'Ythdc2', 'Pde7a', 'Ptpn11', 'Chst11', 'Brd4', 'Ccnd2', 'Tpm4', 'Klf7', 'Maff', 'Lrrc8a', 'Kctd12', 'Hoxa10', 'Runx1', 'Slco2a1', 'Fnip2', 'Epas1', 'K…	808	3
Creb3	['Fkbp14', 'Pdia5', 'Tmem39a', 'Rspry1', 'Gmppb', 'Mcoln1', 'Scfd1', 'Gnptg', 'Uso1', 'Tmed2', 'Ssr4', 'Sec63', 'Golga1', 'Ccdc47', 'Morf4l2', 'Atg5', 'Commd9', 'Erlec1', 'Stx5a', 'Arcn1', 'Sar1a', 'Fitm1', 'Rab5a', 'Pitx2', 'Arf1', '4933434E20Rik', 'Nans', 'Stx4a', 'Fmr1', 'Kdelr3', 'Zfand5', 'Ubn1', 'Cd164', 'Stx6', 'Mapre2', 'Pld3', 'Ogdh', 'Sh3gl1', 'Arl4d', 'Pip5k1a', 'Sumf1', 'Trappc8', 'Tu…	790	3
Nr1h3	['Mttp', 'Rbm47', 'C4b', 'Heph', 'Hnf1b', 'Nptn', 'Espn', 'Gdi2', 'Klc4', 'Slc40a1', 'Nostrin', 'Lgals4', 'Tek', 'Cd36', 'Dhrs3', 'Sh3bgrl2', 'Rab11fip3', 'Hsd17b11', 'Slc30a1', 'Gdf15', 'Cygb', 'Pank1', 'Pdk4', 'Pitpnc1', 'Svep1', 'Xcl1', 'Pik3cb', 'Rreb1', 'Apoa1', 'Abat', 'Zkscan1', 'Tmem140', 'Sesn1', 'Cldn15', 'Calml4', 'Ppp1r1b', 'Ahcyl2', 'Ceacam1', 'Prdm16', 'Stat6', 'Osr2', 'Iqsec2', 'Cd…	764	3
Klf15	['Ap3d1', 'Slc2a4', 'Coro1c', 'Car5b', 'Pter', 'Ddit4', 'Ctf1', 'Vmac', 'Unc13b', 'Dusp5', 'Por', 'Golga2', 'Pgrmc2', 'Lman1', 'Grpel1', 'Tmem143', 'Stxbp2', 'Deptor', 'Aldh6a1', 'Tm2d2', 'Phldb3', 'Cmc1', 'Vac14', 'Casp8ap2', 'Cldn3', 'Rbx1', 'Cox6b1', 'Wee1', 'Pank1', 'Fchsd1', 'Nuak2', 'Arl4a', 'Mlec', 'Orc1', 'Rtn3', 'Mgst3', 'Ces1d', 'Snta1', 'Jup', 'Cited4', 'Foxc2', 'Pdhx', 'Apip', 'Ippk',…	718	3
Esrra	['Dopey2', 'Esrra', 'Ap3d1', 'Siae', 'Slc9a5', 'Apeh', 'Deptor', 'Inpp5a', 'Slc4a7', 'Reep6', 'Scyl2', 'Lpcat3', 'Jup', 'Ascc2', 'Mnt', 'Elmo3', 'Stx17', 'Xpnpep1', 'Snta1', 'Aldh6a1', 'Lpin3', 'Crot', 'Slc2a4', 'Pptc7', 'Lars2', 'Idh3a', 'Epha1', 'Pnpla2', 'Cds1', 'Kctd6', 'Rsf1', 'Abhd2', 'Arhgap26', 'Rab11fip1', 'Atp6v1b2', 'Pex5', 'Llgl2', 'Depdc7', 'Ppp1r16a', 'Mepce', 'Zc3h12a', 'Xpr1', 'Ah…	701	3
Myc	['Gla', 'Napa', 'Ilf3', 'Sirt1', 'Ssr1', 'Ddx5', 'Serf2', 'Zzz3', 'Fkbp14', 'Ssr4', 'Ube2n', 'Tmem39a', 'Mbtd1', 'Utp18', 'Slc35b2', 'Arf6', 'Vps37b', 'Slc43a1', 'Foxred1', 'Srpr', 'Pdia5', 'Plagl1', 'Morc2a', 'Mafg', 'Rab5a', 'Morf4l2', 'Spty2d1', 'Lrig3', 'Armcx6', 'Fbxo33', 'Fbxo32', 'Wwp2', 'Ptprs', 'Fau', 'Sh3gl1', 'Ppib', 'Gabarap', 'Ipo7', 'Oaf', 'Irs1', 'Cd164', 'Taf4b', 'Usp31', 'Nup98',…	696	3
Tead2	['Itsn1', 'Cryzl1', 'Wasf1', 'Olfml3', 'Ephb3', 'Arhgap28', 'Blvrb', 'Prr11', 'Slc2a4', 'Morf4l2', 'Dact3', 'Usf1', 'Inppl1', 'Six5', 'Hdac3', 'Bhlhb9', 'Celf2', 'Prelid2', 'Ola1', 'Pak4', 'Skap2', 'Pdp1', 'Ctf1', 'Prkcsh', 'H2afv', 'Pdlim7', '4931428F04Rik', 'Stx6', 'Mlec', 'Tsen34', 'Prmt1', 'Fzd7', 'Arhgap33', 'Cetn3', 'Rab11a', 'Pnkd', 'Pin1', 'Gprasp2', '6030408B16Rik', 'Hand2', 'Trim46', 'O…	661	3
Srebf1	['Irx3', 'Usf2', 'Arfgef1', 'Morc2a', 'Rc3h2', 'Cdk17', 'Ddx6', 'Zc3h4', 'Sppl3', 'Homer1', 'Vkorc1l1', 'Nckap1', 'Pomgnt1', 'Ubtf', 'Rps6ka3', 'Cntfr', 'Slc4a4', 'Tle3', 'Scamp1', 'Tmem170b', 'Clstn1', 'Wbp4', 'Arid1b', 'Aftph', 'Cmtm4', 'Golga4', 'Cpeb2', 'Wwc1', 'Acvr2a', 'Sos2', 'Cdc73', 'Spred1', 'Atl2', 'Gtf2a1', 'Zfp384', 'Xpot', 'Vezf1', 'Rbm15b', 'Stim1', 'Fbxl20', 'Tsc22d2', 'Ptpn4', 'B…	658	3
Maff	['Fosb', 'Gem', 'Taf4b', 'Cxcl16', 'Maff', 'Arl5b', 'Arl4d', 'Epha2', 'Wsb1', 'Zfand5', 'Egr2', 'Cyr61', 'Gla', 'Azin1', 'Rlim', 'Eif1', 'Coq10b', 'Tgif1', 'Ndel1', 'Mafg', 'Midn', 'Ifrd1', 'Errfi1', 'Zfand2a', 'Yod1', 'Rrad', 'Pqlc1', 'Ivns1abp', 'Bhlhe40', 'Slc19a2', 'Dusp5', 'Slc39a1', 'Hmox1', 'Itpkc', 'Map2k3', 'Gal', 'Rara', 'Ephb3', 'Bag3', 'Itgav', 'Mapk6', 'Ppp2ca', 'Rela', 'Plec', 'Kdm6…	623	3
Sox11	['Tagln3', 'Mpped2', 'Tubb3', 'Meg3', 'Cdk5r1', 'Pkia', 'Tubb2b', 'Ncam1', 'Sox11', 'Celf4', 'Nr2f1', 'Gap43', 'Stmn2', 'Rufy3', 'Pak3', 'Zfhx2', 'Kdm2b', 'Sumo2', 'Tspan13', 'Nova1', 'Dpysl5', 'Pdp1', 'Rspo3', 'Runx1t1', 'Chd7', 'Mdga1', 'Kctd15', 'Ccnt2', 'Smarcd3', 'Snapc3', 'Tacc2', 'Isl1', 'Bcl11a', 'Ccar1', 'Olfm1', 'Rnf145', 'Arhgef7', 'Cadm1', 'Ntm', 'Gdpd5', 'Tcf7l2', 'Vangl2', 'Auts2', …	509	3
Klf5	['Jup', 'St14', 'Dennd2d', 'Prelid2', 'Cldn7', 'Gda', 'Adh1', 'Mall', 'Erbb2', 'Acer2', 'Xpnpep1', 'Mtmr7', 'Mark2', 'Lefty1', 'Ces1d', 'Csrp2', 'Itpr3', 'Mogat2', 'Dram1', 'Fxyd3', 'Tspan1', 'Cyp2s1', 'Cda', 'Nckap1', '9130008F23Rik', 'Cldn3', 'Slc25a20', 'Dstn', 'Mpzl2', 'Psrc1', 'Mov10', 'Klc4', 'Gpx2', '8430408G22Rik', 'Cdkn2b', 'Mgst3', 'Slc25a24', 'Reep6', 'Baiap2l1', '2200002D01Rik', 'Rif1…	497	3
Rxra	['Fabp1', 'Nr1h3', 'Hpgd', 'Slc30a1', 'Slc40a1', 'Gdf15', 'Eepd1', 'Slc15a3', 'Ctnnd1', 'Msr1', 'Tbc1d9', 'Bcl2a1a', 'Rgl1', 'Abca1', '1810011O10Rik', 'Rreb1', 'Spry4', 'Wdfy3', 'Pld1', 'Zfp710', 'Trim8', 'BC005537', 'Dnajc14', 'Plxnc1', 'Ppp1r16b', 'Dusp6', 'Fam53c', 'Fcgr2b', 'Stat6', 'Ncf1', 'Ccnt2', 'Fam117b', 'Jag1', 'Plekha3', 'Tlr4', 'Sh3bgrl', 'Plekhg1', 'Btbd11', 'B430306N03Rik', 'Cfp', …	491	3
Mafk	['Fosb', 'Gadd45b', 'Mdga1', 'Nr4a1', 'Dusp5', 'Sgk1', 'Rreb1', 'Maff', 'Hbegf', 'Col11a2', 'Hmox1', 'Itpkc', 'Map2k3', 'Mafg', 'Flnc', 'Zfp36', 'Bag3', 'Itgav', 'Mapk6', 'Smox', 'Ppp2ca', 'Rela', 'Kdm6b', 'Slc2a1', 'Junb', 'Rtn4', 'Prdm1', 'Srxn1', 'Prr7', 'Acly', 'Midn', 'Rab10', 'Eif5', 'Ermp1', 'Nhsl2', 'Il11', 'Notch3', 'Slc9a1', 'Fosl1', 'Shc1', 'Mdfi', 'Ctgf', 'Gadd45g', 'Elk3', 'Mnt', 'Fl…	460	3
Nr2f6	['H1f0', 'Nr2f6', 'Fblim1', 'D17Wsu92e', 'Il21r', 'Atp1b1', 'Nlrc3', 'Cldn7', 'Esrp2', 'Acbd7', 'Fkbp2', 'Tmem30b', 'Cnn1', 'Tmem150a', 'Epha1', 'Ckmt1', 'Slc25a47', 'Maoa', 'Amotl2', 'Ceacam1', 'Itga3', 'Pak4', 'Capn5', 'Eps8l2', 'Adcy6', 'Nacc2', 'Cdk18', 'Bcam', 'Khk', 'Golga4', 'Tmem120a', 'Pdzk1', 'Zfp710', 'Fam20b', 'Plcb3', 'Zfp532', 'Sema4g', 'Tmem184a', 'Acy1', 'Dpp4', 'Plekha7', 'Acad11…	441	3
Pparg	['Fkbp5', 'Abcd2', 'Sept9', 'Mgst2', 'Lxn', 'Nostrin', 'Agt', 'Sh3bp2', 'Scrn3', 'Mmp19', 'Sult1a1', 'Hpgd', 'Notch2', 'Lpl', 'Acaa2', 'Sdcbp2', 'Egfl8', '2610528J11Rik', 'Krt19', 'Angptl4', 'Gdf15', 'Fabp4', 'Aifm2', 'Sbsn', 'Hpcal1', 'Pon3', 'Elf3', 'Sh3gl2', 'Ahnak', 'Sirpa', '1810011O10Rik', 'Ldhb', 'Mospd1', 'Cd36', 'Dusp9', 'Slc24a5', 'Flt1', 'Abcg1', 'Sprr1a', 'Prkar2b', 'Dusp4', 'Slc27a1'…	403	3
Ppard	['Mttp', 'Pank1', 'Lgals4', 'Sult2b1', 'Cnnm4', 'Klf5', 'Anpep', 'Mogat2', 'Maoa', 'Rab36', 'Slc6a8', 'A230050P20Rik', 'Itga3', 'Zmiz1', 'Capn5', 'Eps8l2', 'Nacc2', 'Cdk18', 'Khk', 'Golga4', 'Cldn15', 'Tmem120a', 'Acbd4', 'Mpp1', 'Plcb3', 'Sema4g', 'Plec', 'Acy1', 'Hyou1', 'Slc7a7', 'Pcdh1', 'Tyw3', 'Sos2', 'Slc1a1', 'Slc25a22', 'Abat', 'Ppfibp2', 'Vasn', 'Sec14l2', 'Map3k6', 'Mgam', 'Slc41a1', '…	370	3
Foxa2	['Llgl2', 'Ccnd1', 'Cadm1', 'Neurl1a', 'Lpin2', 'Prdm16', 'Bhlhe41', 'Dbp', 'Huwe1', 'Foxp2', 'Prr15l', 'Hpn', 'Rbm47', 'Tnks1bp1', 'Espn', 'Nog', 'Runx1', 'Atp6v1c2', 'Npnt', 'Fxyd3', 'Kdm2b', 'Emb', 'Slc6a9', 'Slc39a8', 'Aldh1a1', 'Aldh1a7', 'Capsl', 'Tspan8', 'Etv5', 'Traf3ip1', 'Krt19', 'Cdk14', 'Dock9', 'Smpd3', 'Mllt3', 'Kif5b', 'Selenbp1', 'Dsp', 'Irx3', 'Tdrd3', 'Zfp704', 'Hist1h1d', 'Cyp…	352	3
Nfatc4	['Rab13', 'Dkk2', 'Ccdc80', 'C1qtnf7', 'Lpar4', 'Svep1', 'Pcgf2', 'Lama4', 'Dnm3os', 'Nfatc4', 'Il11ra1', 'Kcne4', 'Hic1', 'Fkbp10', 'Cald1', 'Fzd7', 'Bcl9', 'Cdh11', 'Lpl', 'Hoxb2', 'Mmp3', '5730455P16Rik', 'Fkbp9', 'Thbs2', 'R3hdm1', 'Rspo3', 'Eln', 'Tbx18', 'Mgp', 'AW551984', 'Olfml3', 'Meg3', 'Tlcd2', 'Ctsk', 'Col1a2', 'Smo', 'Lrrc17', 'Cav1', 'Twist2', 'Col5a3', 'Osr1', 'Cyp7b1', 'Col3a1', '…	257	3
Egr1	['Igfbp5', 'Fosb', 'Rhob', 'Egr1', 'Socs3', 'Sparc', 'Maff', 'Itm2c', 'Cyr61', 'Fxyd1', 'Trps1', 'Lrp1', 'Spred1', 'Klf9', 'Midn', 'Vldlr', 'Atp2b1', 'Tcf7l2', 'Tshz3', 'Maf', 'Nfix', 'Nfia', 'Zfp516', 'Hipk3', 'Brd2', 'Aff4', 'Skil', 'Hes1', 'Pdgfa', 'Cyp26b1', 'Rora', 'Atp1a1', 'Tcf4', 'Egr2', 'Cd2ap', 'Ptrf', 'Jup', 'Acvr1', 'Spred2', 'Bcl9l', 'Tanc2', 'Nuak1', 'R3hdm2', 'Pld2', 'Dhrs3', 'Socs…	234	3
Egr2	['Tpbg', 'Tbc1d10a', 'Nab2', 'Foxo1', 'Inha', 'Thbs1', 'Ptges', 'Trps1', 'Gem', 'Psap', 'Fst', 'St3gal5', 'Rasgef1b', 'Ephb3', 'Nr4a2', 'Mapk8', 'Brd2', 'Tgfb3', 'Kctd11', 'Ccnt1', 'Bcl2a1d', 'Phf13', 'Gdf15', 'Klf10', 'Sertad1', 'Tslp', 'Hspa8', 'Zfand5', 'Socs3', 'Tor1aip2', 'Maff', 'Relb', 'Mex3c', 'Bcl2a1a', 'Abcd2', 'Myof', 'Pdpn', 'Tiparp', 'Cttnbp2nl', 'Rrad', 'Erf', 'Tnf', 'Sgk1', 'Lysmd3…	225	3
Hnf1b	['Fxyd2', 'Kifc3', 'S100g', 'Pcbd1', 'Ttc36', 'Cpn1', 'Atp1b1', 'Cldn10', 'Cela1', 'Aldob', 'Gsta3', 'Tstd1', 'Atp6v1a', 'Baiap2l2', 'Plekha6', 'Ddc', 'Hoxb7', 'Amn', 'Tef', 'Slc4a4', 'Akr1c19', 'Wbp2', 'Igsf5', 'Extl2', 'Pkp4', 'Gas2', 'Hnf1b', 'Car4', 'Grb7', 'Crb3', 'Ppp1r1a', 'Znrf3', 'Cxxc5', 'Sema3b', 'Rab3ip', 'Ddah1', 'Rcan2', 'Lpp', 'Prom1', 'Hpn', 'Abcc4', 'Tcea3', 'Mgll', 'Glis2', 'Khk…	204	3
Mitf	['Aff4', 'Gla', 'Hnrnph2', 'Mfsd1', 'Tmem55b', 'Mcoln1', 'Wls', 'Osbpl8', 'Snx8', 'Calr', 'Nsmce2', 'Hps3', 'Dnmt3a', 'Pld3', 'Hmox1', 'Gtf2a1', 'Clcn5', 'Bnip3l', 'Gns', 'Tada1', 'Ptprs', 'Ehmt2', 'Atp6v0d1', 'Rlim', 'Cd63', 'Fnip2', 'Rragc', 'Ctsd', 'Lamp1', 'Mef2a', 'Lrfn4', 'Fbxo32', 'Grn', 'Slc38a7', 'Vps35', 'Ntrk2', 'Ythdf1', 'Tasp1', 'Ctns', 'Naglu', 'Atp6v0c', 'Scarb2', 'Bloc1s1', 'Itga6…	202	3
Dbp	['Per3', 'Svep1', 'Epas1', 'Cdk14', 'Tef', 'Plvap', 'Igfbp3', 'Kitl', 'Ces1d', 'Nr1d1', 'Steap4', 'Ccnd1', 'Nrp1', 'Myo1c', 'Car4', 'Neurl1b', 'Per2', 'Nfib', 'Nav2', 'Ext1', 'Prex2', 'Slit2', 'Klhl9', 'Ctnnd1', 'Stc1', 'Plxna2', 'Rapgef4', 'Itga6', 'Wwp1', 'Prdm16', 'Hist1h1e', 'Taok2', 'Kifc3', 'Ptpn21', 'Irf2', 'Col13a1', 'Ntf3', 'Rtn4rl1', 'Tbx2', 'Foxa2', 'Tead1', 'Ankrd40', 'Etv5', 'Heg1', …	195	3
Grhl1	['Fbxw7', 'Ehf', 'Crkl', 'Zhx2', 'Phka1', 'Asl', 'Brwd3', 'Faf1', 'Ralbp1', 'Ddi2', 'Oit1', 'Rab25', 'Grhl1', 'P2ry2', 'Stard10', 'Rab27b', 'Slc22a18', 'Chmp2b', 'Edn1', 'Cdh1', 'Dsp', 'Zrsr2', 'Bcap31', 'Bmf', 'Ndfip2', 'Esrp2', 'Rapgef3', 'Galnt3', 'Fam63a', 'Hopx', 'Pparg', 'Macrod1', 'Met', 'Wipf2', 'Epha1', 'Acsl4', 'Usp6nl', 'Yes1', 'Lpcat4', 'Nipal2', 'Abl2', 'Cobll1', 'Hspb8', 'Polr1d', '…	175	3
Nr2f2	['Smarcd3', 'Plxna2', 'Hic1', 'Hoxa10', 'Mylip', 'Zfp36l1', 'Fnbp1l', 'Mecom', 'Zfp503', 'Kcnk3', 'Tbx2', 'Nfib', 'Ctnnb1', 'Zadh2', 'Edn1', 'Pcgf2', 'Laptm4b', 'Smarca2', 'Snora78', 'Nrp1', 'Efnb2', 'Tbx3', 'Ier5l', 'Il11ra1', 'Meis2', 'Acvr2a', 'Ptms', 'Maf', 'Nr2f2', 'Ube2r2', 'Polr2a', 'Svep1', 'Egr1', 'Pkdcc', 'Pop5', 'Isl1', 'Id4', 'Calm1', 'Fermt2', 'Gnaq', 'Fnip2', 'Klf7', 'Rbpms2', 'Igfb…	167	3
Nfatc2	['Tnks1bp1', 'Fndc3b', 'Clstn3', 'Itga5', 'Nr4a2', 'Cyld', 'Cytl1', 'Gli3', 'Nfatc1', 'Lag3', 'Il11', 'Chst11', 'Sh3gl1', 'Cog3', 'Mdga1', 'Zmiz1', 'Edil3', 'Ikzf2', 'Scara3', 'Rngtt', 'Ythdc1', 'Rfx5', 'Mef2a', 'Runx1', 'Dixdc1', 'Clec11a', 'Atxn1', 'Myo1e', 'Sdk2', 'Tiam2', 'Hmga1', 'Fibin', 'Lgr6', 'Nrk', 'Prelp', 'C1qtnf3', 'Neat1', 'Per2', 'Col12a1', 'Nedd9', 'Zfp36l2', 'Clock', 'Nog', 'Mall…	162	3
Bhlhe41	['Slc35a5', 'Arhgap12', 'Tpp1', 'Zfyve26', 'Tom1', 'Gigyf1', 'Aff4', 'Zfp292', 'Mcoln1', 'Cbx6', 'Hdac5', 'March8', 'Pld3', 'Usp32', 'Trim8', 'Prkce', 'Atp6v1a', 'Dirc2', 'Vps11', 'Asxl2', 'Zfp367', 'Rc3h2', 'Tug1', 'Rcbtb1', 'Sppl3', 'Spred1', 'Gnptg', 'Usp31', 'Vps72', 'Eif5a2', 'Cxxc5', 'Cyhr1', 'Ptch1', 'Arhgap23', 'Bmp7', 'AW549877', 'Ctns', 'Trim3', 'Prickle2', 'Tceal3', 'Scrn1', 'Nptn', 'T…	158	3
Tead3	['Efemp2', 'Plekhg3', 'Tcf21', 'Rhod', 'Arap1', 'Acta2', 'Sema4a', 'Fzd7', 'Tpbg', 'Chrnb1', 'Rhbdf1', 'Itgb1', 'Strn3', 'Olfml3', 'Erbb2', 'Trip6', 'Gipc1', 'S1pr2', 'Ltbp2', 'Sulf1', 'Tslp', 'Ctf1', 'Prkci', 'Krt19', 'Tacstd2', 'Tiam1', 'Gpx8', 'Hmgn3', 'Cgnl1', 'Speg', 'Rgs5', 'Tead3', 'Slc14a1', 'Cldn4', 'Gprc5c', 'Bmpr1a', 'Meox1', 'Pcdh18', 'A430105I19Rik', 'Itga3', 'Hspa12b', 'Tpm1', 'Yap1…	115	3
Tef	['Lims2', 'Per3', 'Nfix', 'Fgf1', 'Tef', 'Hopx', 'Pcdh1', 'Aplp2', 'Epas1', 'Limch1', 'Cldn10', 'Nr1d1', 'Sorbs3', 'Nr1d2', 'Clstn1', 'Slco3a1', 'March8', 'Cdk14', 'Mfsd6', 'Fgfr3', 'Spred1', 'Fbxl3', 'Slc44a1', 'Macf1', 'Cdc42bpa', 'Sept4', 'Mkl2', 'Gdf10', 'Acvr1b', 'Fam126b', 'Plcb1', 'Pkp4', 'Pld1', 'Cyp39a1', 'Gpr155', 'Pik3c2a', 'Mpp5', 'Klhl26', 'D17Wsu92e', 'Cry2', 'Itpr1', '9430020K01Rik…	114	3
Gata6	['Apobec2', 'Myl7', 'Tnnt2', 'Aldh1a1', 'Eln', 'Art4', 'Sh3bgr', 'Fhl2', 'Hand2', 'Srl', 'Eno3', 'Pdlim3', 'Atp2a2', 'Tnni3', 'Hmgcs2', 'Sulf1', 'Nos3', 'Smoc1', 'A430105I19Rik', 'Arhgap1', 'Rgs5', 'Stc1', 'Uqcr10', 'Smarcd3', 'Cdc42ep1', 'Gata6', 'Eng', 'Fbln2', 'Wnt2', 'Cant1', 'Vcan', 'Adamts9', 'Thra', 'Dok4', 'Dock9', 'Tbx3', 'Tead1', '9430020K01Rik', 'Smtnl2', 'Cdc42ep3', 'Smarca2', 'Mid1ip…	106	3
Foxc1	['Nfatc2', 'Nfatc1', 'Trib1', 'Mmp13', 'Col11a2', 'Cyr61', 'Comp', 'Taf4b', 'Nr4a2', 'Tnks1bp1', 'Foxp2', 'Bambi', 'Fxyd2', 'Rin2', 'Cd109', 'Dstn', 'Mtmr14', 'Tpm1', 'Emp1', 'Srf', 'Cnrip1', 'Igf1r', 'Slc29a1', 'Nrarp', 'Ccdc80', 'Ecm2', 'Sulf1', 'Kctd15', 'Hivep2', 'Srl', 'Pdk4', 'Osr2', 'Bcas3', 'Med13l', 'Hist1h1a', 'Psd3', 'Ctsf', 'Otud7b', 'Efna1', 'Lpin2', 'Klf9', 'Pcp4l1', 'Zcchc5', 'Ngef…	91	3
Foxp2	['Foxp2', 'Ust', 'Hist1h1a', 'Zfyve16', 'Sox11', 'Bcl11b', 'Ctnnbip1', 'Pcp4', 'Inhba', 'Nkd1', 'Pde3a', 'Mex3a', 'Nfe2l1', 'Rwdd3', 'Pja1', 'Celf4', 'Tmod3', 'Harbi1', 'R3hdm2', 'Clns1a', 'Meis2', 'Hbp1', 'Ssbp2', 'Ap1g1', 'Gss', 'Adamtsl4', 'Osbpl6', 'Asb4', 'Atn1', 'Tcf7l2', 'H2afy2', 'Igfbp2', 'Ube2e2', 'Smarca2', 'Tob2', 'Gng8', 'Ctnnd1', 'Ttc30b', 'Hand2', 'Tubg2', 'Nprl3', 'Pak3', 'Fzd3', …	73	3
Srf	['Foxp2', 'Zswim6', 'Srf', 'Ubtf', 'Asxl1', 'Cd109', 'Btbd11', 'Rnf19b', 'Ank', 'Nfat5', 'Map4k4', 'Otud4', 'Vegfa', 'Arih1', 'Smad7', 'Med13l', 'Arhgef17', 'Omd', 'Zfp687', 'Myo1e', 'Igf1r', 'Plec', 'Dst', 'Acvr1', 'Acan', 'Chsy1', 'Nsd1', 'Usp47', 'Trib1', 'Cyr61', 'Glg1', 'Scara3', 'Pabpc4', 'Sox11', 'Zbtb2', 'Sox12', 'Jag1', 'Samd4', 'Hivep3', 'Cables2', 'Zbtb38', 'Zmym4', 'Chad', 'AI837181',…	73	3
Hoxc6	['Hoxb8', 'Tbx15', 'Hoxa7', 'Hoxa9', 'Hoxc10', 'Hoxc6', 'Inhba', 'Fst', 'Dkk2', 'Hoxc9', 'Pth1r', 'Osr2', 'Twist2', 'Ndufa4l2', 'Fzd2', 'Rdh10', 'Ephb3', 'Prrx2', 'Col2a1', 'Zfp516', 'C1qtnf7', 'Peli2', 'Rpp25', 'Pitx2', 'Meis3', 'Runx1t1', 'Wif1', 'Cyp26b1', 'Pdgfa', 'Nova1', 'Hoxb7', 'Zfhx4', 'Mgst1', 'Rcor2', 'Prmt6', 'Pdgfra', 'Pcdh18', 'Pdia5', 'Arhgef25', 'Scrg1', 'Gnas', 'Lmcd1', 'Hjurp', …	72	3
Ddit3	['Herpud1', 'Plekhh3', 'Ddit3', 'Slc7a11', 'Isg20', 'Btg1', 'Atf3', 'Bdp1', 'Stfa3', 'Sergef', 'Sh2b2', 'Ubb', 'Blcap', 'Rnf149', 'Sephs2', 'Ccl3', 'Trem1', 'Hmox1', 'Rarres1', 'S100g', 'Arrdc3', 'Coq10b', 'Pear1', 'Fgd3', 'Tnf', 'Nacc1', 'Il1f9', 'Enpp3', 'Sertad2', 'Rnf144b', 'Dnajb9', 'Pik3c3', 'Cln3', 'Ppa2', 'Osgin1', 'Penk', 'Ddx5', 'Plk3', 'Sh2d3c', 'Orm1', 'Atp6v1b2', 'Plaur', 'Faf1', 'Ch…	66	3
Nfia	['Cav1', 'Lrrc17', 'Aspn', 'Lama4', 'Adamts1', 'Rhoj', 'Fxyd1', 'Cpe', 'Nfia', 'Nfix', 'Rtn2', 'Prnp', 'Ccdc80', 'Matn2', 'Col5a1', 'Eln', 'Aplp2', 'Slc16a2', 'Tnxb', 'Antxr1', 'Sec63', 'Zfp521', 'Plxna2', 'Rbms3', 'Sspn', 'Zfhx4', 'Thra', 'Tcf12', 'Hipk3', 'Gdf10', 'Lrig1', 'Mkl2', 'Nfe2l1', 'Acvr1', 'Daam1', 'Srek1', 'Zfp46', 'Tead1', 'Hdac4', 'Chd6', 'Ebf1', 'Eml1', 'Smad5', 'Cachd1', 'Fmnl2',…	59	3
Hoxc10	['Hoxb8', 'Tbx15', 'Actb', 'Hoxa7', 'Hoxb4', 'Hoxa9', 'Slit2', 'Crlf1', 'Ccnd1', 'Osr1', 'Rsrc1', 'Hoxc10', 'Runx1t1', 'Hoxc6', 'Dkk2', 'Hoxa10', 'Twist2', 'Fxyd2', 'Hoxc9', 'Mmp3', 'Fap', 'Six1', 'Gas1', 'Serpinf1', 'Pipox', 'Pter', 'Steap2', 'Hoxb7', 'Prrx2', 'Atg2b', 'Gas2', 'Ercc2', 'Prrx1', 'Bdnf', 'Tbx18', 'Fggy', 'Eno3', 'Zfp664', 'Ebf2', 'Aifm1', 'Aph1a', 'Prkcz', 'Vgll3', 'Map2k6', 'Iqse…	45	3
Hoxa9	['Hoxb7', 'Hoxb8', 'Aqp3', 'Dkk2', 'Hoxa10', 'Fxyd2', 'Hoxa7', 'Hoxc10', 'Osr2', 'Mdga1', 'Bmp7', 'Hoxc6', 'Bcor', 'Wnt5a', 'Hoxa9', 'Pth1r', 'Gata2', 'Runx2', 'Hoxc9', 'Nuak2', 'Ano1', 'Tm7sf2', 'Gch1', 'Runx1t1', 'Ripk4', 'Ppm1l', 'Rnf144b', 'Angpt1', 'St3gal3', 'C1qtnf3', 'Ncoa3', 'Rab33b', 'Sox4', 'Wnt4', 'Nrg1', 'Tnpo2', 'Cyb5rl', 'Vav3', 'Zkscan1', 'Sdr42e1', 'Zyg11b', 'Phka2']	42	3
Tcf7l2	['Zfp710', 'Prdm16', 'Olfm1', 'Cpne5', 'Dlgap4', 'Smarcd3', 'Nfix', 'Celf4', 'Nova1', 'Capn1', 'Nfib', 'Usp47', 'Zfhx2', 'Kitl', 'Acvr1b', 'Arhgef7', 'Fbxw7', 'Mmp15', 'Cdk5r1', 'Gadd45g', 'Ank3', 'Lhx2', 'Crabp2', 'Sox11', 'Tubb2b', 'Dnmt3a', 'Cnnm3', 'Nr2f1', 'Plk3', 'Abcd2', 'Abr', 'Chd7', 'Vtn', 'Ada', 'Rcor2', 'Elavl3', 'Zfhx3', 'Zfp292', 'Tcf7l2', 'Plxna1', 'Abcg1', 'Dapk1']	42	3
Hoxb2	['Cadm1', 'Hoxa5', 'Tbx2', 'Hoxb5', 'Gprc5c', 'Bambi', 'Col13a1', 'Nrp2', 'Hoxb2', 'Tmem119', 'Bmp4', 'Car3', 'Creb3l1', 'Hoxb6', 'Gng11', 'Hoxb4', 'Id3', 'Zfp503', 'Pcdh18', '2010111I01Rik', 'Hoxb7', 'Bmp7', 'Kazald1', 'Hoxa7', 'Cgref1', 'Pls3', 'Fap', 'Cdh11', 'Pth1r']	29	3
Hoxb5	['Tbx2', 'Socs2', 'Hoxa5', 'Hoxb5', 'Epha7', 'Hoxb6', 'Hic1', 'Meis1', 'Mdk', 'Zfp503', 'Hoxb2', 'Wnt2', 'C1qtnf7', 'Bmp4', 'Ralb', 'Hoxb4', 'Bmp5', 'H2afy2', 'Hist1h2ag', 'Arhgef17', 'Angpt1', 'Rnf219', 'Ctbp2', 'Zadh2', 'Arhgap6', 'Nfatc4', 'Cdh11']	27	3
Jund	['Cd74', 'Plxnc1', 'Jun', 'Pnrc1', 'Gnas', 'Cebpb', 'Btg2', 'Neat1', 'Itm2b', 'Jdp2', 'Ubc', 'Jund', 'Malat1', 'Junb', 'Ypel3', 'Zfp36', 'Bmp2', 'Vcam1', 'Apoc1', 'Nr1h3', 'Sdc3', 'Ctsd', 'Ehd3', 'Plau', 'Adam23', 'Lipa', 'Folr2']	27	3
Hoxa7	['Hoxb8', 'Hoxb7', 'Hoxa7', 'Hoxb6', 'Npy', 'Fxyd2', 'Igfbp4', 'Hoxa9', 'Hoxc9', 'Hoxb4', 'Hoxc6', 'Pitx1', 'Ppp1r1a', 'Gria3', 'Car12', 'Dnajc12', 'Pter', 'Fggy', 'Slc2a4', 'Ptges2', 'Pth1r', 'Hoxc10', 'Hoxa5', 'Hoxb2', 'Pipox']	25	3
Gli1	['Ptch1', 'Fstl1', 'Hhip', 'Pth1r', 'Gpc3', 'Osr2', 'Tnfrsf19', 'Wnt2', 'Col7a1', 'Gli1', 'Cdkn1c', 'Vcan', 'Bmp5', 'Plagl1', 'Fxyd6', 'Fzd2', 'Meg3', 'H19', 'Adam33', 'Twist2', 'Pitx2', 'Tspan11', 'Trps1', 'Ctbp2']	24	3
Hoxa5	['Tbx2', 'Mdk', 'Meis2', 'Hoxa5', 'Hoxb2', 'Hoxb6', 'C1qtnf7', 'Nnat', 'Meis1', 'Alas2', 'Hoxb5', 'Stbd1', 'Igfbp4', 'Zfp503', 'Hoxa7', 'Wnt2', 'Pcdh18', 'H2afy2', 'Bmp4', 'Sema3a', 'Speg', 'Mylk']	22	3
Hoxb7	['Hoxb7', 'Hoxa7', 'Hoxb8', 'Fxyd2', 'S100g', 'Hoxb6', 'Pipox', 'Hoxa9', 'Ppp1r1a', 'Hpn', 'Crabp1', 'Pter', 'Ass1', 'Ldhb', 'Abat', 'Tmie', 'Hoxc9', 'Bmp7', 'Hoxb2']	19	3
Hlf	['Ak4', 'Nr1d1', 'Nr1d2', 'Galnt11', 'Hlf', 'Pelo', 'Fam195a', 'Sox13', 'Foxo3', 'Angpt1', 'Fzd4', 'Il6ra', 'Dbp', 'Pter', 'Ammecr1', 'Zhx1', 'Adck1']	17	3
Gli2	['Txlng', 'Gli2', 'Kdelr3', 'Tnni2', 'Tulp3', 'Acta1', 'Sec24d', 'Fam114a1', 'Myadm', 'Sorcs2', 'Nanos3', 'Col1a1', 'Plcd1', 'Tnc']	14	3
Sox10	['Plp1', 'Enpp2', 'Trf', 'Camk2a', 'Sept4', 'Plekhb1', 'Gjb1', 'Slc38a3', 'Apod', 'Ptprd', 'Nrbp2', 'Slc1a3', 'Daam2']	13	3
Nfic	['Creb5', 'Svep1', 'Gas7', 'Adamtsl1', 'Nfix', 'Smad3', 'Rbms3', 'Arap1', 'Lamc1', 'Svil', 'Lhfpl2']	11	3
Nfat5	['Camk2g', 'Atp2a2', 'Acan', 'Nuak1', 'Igf1r', 'Rock2', 'Hipk3', 'Phactr2', 'Pcnx', 'Spry2']	10	3
Pitx2	['Gtf2ird1', 'Bmp4', 'Flrt3', 'Grem2', 'Arap1', 'Pitx2', 'Ip6k2', 'Rtn2', 'Tubg2']	9	3
Tbx2	['Nrp2', 'Pth1r', 'Myo1b', 'Lbh', 'Npnt', 'Lox', 'Fzd7', 'Aldh1a7']	8	3
Msx1	['Tbx15', 'Cacna2d1', 'Msx1', 'Pla1a', 'Msx2', 'Enpp2']	6	3
Rarg	['Map3k4', 'Iffo2', 'Slc29a1', 'Socs5', 'Slc12a4', 'Uba6']	6	3
Ets1	['Zfp668', 'Lims1', 'Rasgrp3', 'Lcp2', 'Fbxo28', 'Ctnna1', 'Tbkbp1', 'Osmr', 'Chd2', 'Sept1', 'Cd14', 'Trim8', 'Ss18', 'Pik3r4', 'Polr2a', 'Klhl6', 'Vcpip1', 'Zfp697', 'Rasip1', 'Acvr1', 'Xcl1', 'Kti12', 'Grap', 'Tmem204', 'Cdipt', 'Dnajc14', 'Arhgap25', 'Rps19', 'Gngt2', 'Nr1h2', 'Emcn', 'Pik3r5', 'Acap2', 'Rnf167', 'Gpsm3', 'Epn3', 'Mmrn2', 'Trim35', 'Tram2', 'Abi3', 'Fryl', 'Daxx', 'Tsc22d4', …	2229	4
Elf1	['Nr1h2', 'Rnf167', 'Rps18', 'Eaf1', 'Cdk13', 'Isy1', 'Arpc2', 'Mdm4', 'Kti12', 'Senp7', 'Lypla2', 'Atg16l1', 'Epn1', 'Ap1b1', 'Pyroxd1', 'Arih2', 'Stk4', 'Zfp384', 'Gga1', 'Zcchc6', 'Cap1', 'Sptlc2', 'Rps6', 'Tbc1d22a', 'Kctd2', 'Nipbl', 'Bin3', 'Pigt', 'Dpp8', 'Dalrd3', 'Mfap1b', 'C2cd3', 'Pik3r4', 'Daxx', 'Dhx38', 'Sass6', 'Csnk1g1', 'Hnrnpd', 'Zbtb11', 'Ubr1', 'Il2rg', 'Fbxl12', 'Mbd1', 'Mcm3…	2081	4
Irf8	['Fcgr2b', 'Tmem206', 'Alox5ap', 'Tlr4', 'Map3k8', 'Tagap', 'Elmo1', 'Usp38', 'Dusp5', 'Lpxn', 'Lsp1', 'Plek', 'Cd68', 'Lmo2', 'Arhgap22', 'Samsn1', 'Fcrla', 'Sp100', 'Zfp710', 'Ccl4', 'Lrmp', 'Ncf2', 'Cd74', 'Lcp2', 'Cfp', 'Pold4', 'Mogat2', 'Arhgef3', 'Irf2', 'Siglecg', 'C1qc', 'Slc15a3', 'Bcl2a1b', 'Vcpip1', 'Sh3tc1', 'Bcl2a1a', 'Cd36', 'H2-K2', 'Plxnc1', 'Zbtb7b', 'Gpr183', 'Arhgap30', 'Dok3'…	2067	4
Stat1	['Fcgr2b', 'Map3k8', 'Tagap', 'Elmo1', 'Usp38', 'Dusp5', 'Lpxn', 'Lsp1', 'Plek', 'Cd68', 'Cxcr3', 'Fbxo28', 'Samsn1', 'Fcrla', 'Fbxl12', 'Sp100', 'Zfp710', 'Ccl4', 'Lrmp', 'Ncf2', 'Cd74', 'Lcp2', 'Cfp', 'Pold4', 'Mogat2', 'Arhgef3', 'Irf2', 'Siglecg', 'C1qc', 'Fam179b', 'Slc15a3', 'Itpkb', 'Bcl2a1b', 'Vcpip1', 'Sh3tc1', 'Bcl2a1a', 'H2-K2', 'Plxnc1', 'Zbtb7b', 'Gpr183', 'Arhgap30', 'Laptm5', 'Bcl2…	1795	4
Irf7	['Rtp4', 'Isg15', 'Trim8', 'Zfp710', 'Irf2', 'Oasl1', 'Ifit3', 'Usp18', 'Rsad2', 'Slc15a3', 'Map3k8', 'Ccl5', 'Zbp1', '5430427O19Rik', 'Rasgrp3', 'Zfp36l1', 'Ccl4', 'Fcgr4', 'Cybb', 'Bst2', 'Itga3', 'Ifitm2', 'Cdipt', 'Slc7a11', '1810024B03Rik', 'Parp14', 'Itpkb', 'B2m', 'Fn1', 'Gadd45b', 'Nedd9', 'Alox5ap', 'Cxcl10', 'Socs1', 'Actb', 'Dnajc14', 'Ptpn6', 'Dclre1c', 'Hivep1', 'Clec7a', 'Armcx6', '…	1596	4
Taf1	['Tlk1', 'Lsm14a', 'Ppp3ca', 'Ddx6', 'Zc3h4', 'Arid1a', 'Tapt1', 'Vkorc1l1', 'Tle3', 'Smarcd3', 'Usf2', 'Nfe2l1', 'Rbm15b', 'Gfra1', 'Sema6d', 'Ptpn4', 'Pde7a', 'Slc4a4', 'Ddx17', 'Nckap1', 'Cyb5d2', 'Pja2', 'Clstn1', 'Prkcsh', 'Ubl3', 'Scaf11', 'Pim1', 'Tab2', 'Cdc73', 'Usp6nl', 'Zfp384', 'Arfgef1', 'Rc3h2', 'Lin54', 'Ptpn12', 'Ubtf', 'Sppl3', 'Ankrd28', 'Nr2f1', 'Galc', 'Gtf2a1', 'Cdkn1b', 'Cpe…	1467	4
Fli1	['Nr1h2', 'Atg16l1', 'Rnf167', 'Polr2a', 'Rac1', 'Ppp4c', 'Fli1', 'Rasgrp3', 'Bin3', 'Tbc1d22a', 'Pik3cg', 'Arpc2', 'Epn1', 'Tsc22d4', 'Daxx', 'Rpe', 'Fibp', 'Rapgef6', 'Zfp410', 'Tbc1d8', 'Mpo', 'Klhl6', 'Stk4', 'Mark2', 'Tbkbp1', 'Tmbim6', 'Tmem204', 'Lcp2', 'Med14', 'Slc39a9', 'Dhx38', 'Mdm4', 'Sept1', 'Grap', 'Rgl2', 'Klhl20', 'Mta2', 'Pex11a', 'Topbp1', 'Cd93', 'Elac2', 'Arpc3', 'Uaca', 'Fam…	1440	4
Ikzf1	['Bin3', 'Pik3cg', 'Kti12', 'Arfip1', 'Grap', 'Cyb561d2', 'Tsc22d4', 'Pik3r5', 'Arhgap25', 'Rac1', 'Baz1a', 'Lypla2', 'Elmo1', 'Ss18', 'Usp11', 'Nr1h2', 'Gga1', 'Plcb2', 'Sept1', 'Vav1', 'Coro1b', 'Stk4', 'Sf1', 'Nckap1l', 'Fbxl12', 'Zfp384', 'Klhl20', 'Gnai3', 'Vps52', 'Rps18', 'Prkch', 'Rpl32', 'Dennd1b', 'Dpp8', 'Cblb', 'Mpo', 'Usp38', 'Fam188a', 'Spn', 'Arpc2', 'Chd2', 'Anks1', 'Usf1', 'Vps13…	1415	4
E2f4	['Mcm3', 'E2f8', 'Mcm6', 'Nolc1', 'E2f2', 'Casp8ap2', 'Rprd1b', 'Trmt2a', 'Mcm4', 'Lig1', 'Uhrf1', 'Ssrp1', 'Hells', 'Gins3', 'Mxd3', 'Topbp1', 'Pola1', 'Atad2', 'Hnrnpc', 'Sin3a', 'Gins2', 'Ncapg', 'Uhrf2', 'Fhod1', 'Srsf2', 'Cdc6', 'Rb1', 'Rfwd3', 'Nop10', 'Rsrc2', 'Kntc1', 'Mcmbp', 'Ythdf1', 'Mcm8', 'Eif3k', 'Nubp1', 'Hist1h4d', 'Rbl1', 'Zfp524', 'Srsf1', 'Tra2b', 'Hist2h4', 'Atp5g1', 'Agfg2',…	1358	4
Irf5	['Polr2a', 'Rtp4', 'Isg15', 'Trim8', 'Zfp710', 'Irf2', 'Oasl1', 'Ifit3', 'Usp18', 'Rsad2', 'Slc15a3', 'Map3k8', 'Elmo1', 'Ccl5', 'Zbp1', 'Stap1', '5430427O19Rik', 'Rasgrp3', 'Zfp36l1', 'Ccl4', 'Fcgr4', 'Cybb', 'Bst2', 'Slc7a11', 'Snrnp200', 'Parp14', 'B2m', 'Nedd9', 'Alox5ap', 'Cxcl10', 'Actb', 'Il4i1', 'Ptpn6', 'Dclre1c', 'Clec7a', 'Sgms1', 'Ccnt2', 'Oas2', 'Uba7', 'Arhgap25', 'Tlr4', 'Cxcr5', '…	1163	4
Irf9	['Polr2a', 'Rtp4', 'Isg15', 'Trim8', 'Irf2', 'Oasl1', 'Ifit3', 'Usp18', 'Rsad2', 'Otud4', 'Map3k8', 'Ccl5', 'Zbp1', '5430427O19Rik', 'Zfp36l1', 'Ccl4', 'Cybb', 'Bst2', 'Snrnp200', 'Parp14', 'Itpkb', 'B2m', 'Nedd9', 'Asxl1', 'Dclre1c', 'Hivep1', 'Clec7a', 'Ddo', 'Ubtf', 'Ccnt2', 'Oas2', 'Uba7', 'Arhgap25', 'Fli1', 'Mgat4a', 'Gzma', 'Sdpr', '2810403A07Rik', 'Grap', 'Gna13', 'Dapp1', 'Gripap1', 'Usp…	1143	4
Rel	['Nfkb2', 'Nfkbia', 'Gpbp1', 'Nfkbiz', 'Tnfaip3', 'Gadd45b', 'Cxcl10', 'Icam1', 'Relb', 'Map3k8', 'Dusp6', 'Cxcr5', 'Cd69', 'Rel', 'Ank2', 'Cxcl2', 'Tank', 'Tnip1', 'Cyld', 'Cd74', 'Rilpl2', 'Fchsd2', 'Dnaja1', 'Ccl5', 'Neurl3', 'Dusp5', 'Hivep2', 'Egr2', 'Irf1', 'Clock', 'Casp4', 'Ccnl1', 'Rc3h2', 'Pou2f2', 'Sirt1', 'Ebf1', 'Fam65b', 'Dennd4a', 'Cdk17', 'Neat1', 'Ptprj', 'H2-Q6', 'Map4k4', 'Actr…	929	4
Spib	['Tmem206', 'Map3k8', 'Tagap', 'Elmo1', 'Lpxn', 'Lsp1', 'Plek', 'Ppp1r16b', 'Lmo2', 'Samsn1', 'Fcrla', 'Sp100', 'Lrmp', 'Ncf2', 'Cd74', 'Pold4', 'Arhgef3', 'Irf2', 'Siglecg', 'Sftpd', 'H2-K2', 'Zbtb7b', 'Gpr183', 'Arhgap30', 'Dok3', 'Laptm5', 'Ikzf2', 'Aff3', '5430427O19Rik', 'Pik3r5', 'Ptpn6', 'Pkn1', 'H2-K1', 'Rasgrp3', 'Stk4', 'Stap1', 'Nfkbid', 'Il1r2', 'Arhgap25', 'Bank1', 'Wdfy4', 'Rftn1', …	881	4
Elf4	['Pik3cg', 'Appl2', 'Csnk1g1', 'Strn', 'Tbc1d22a', 'Fbxo28', 'Pik3r5', 'Gga1', 'Usp38', 'Arhgap25', 'Rpe', 'Tjp2', 'Atg16l1', 'Phrf1', 'Zfp513', 'Rrp12', 'Ccnt1', 'Stk4', 'Gnai3', 'Polr2a', 'Vps13b', 'Pik3c3', 'Chchd5', 'Pick1', 'Fli1', 'Ddx21', 'Mta2', 'Tbkbp1', 'Spata2', 'Sptlc2', 'Klhl6', 'Rhog', 'Ankrd17', 'Map3k11', 'Gapt', 'Fam179b', 'Etv6', 'Slc39a9', 'Vav1', 'Mpo', 'Lcp2', 'Nckap1l', 'Rap…	828	4
Irf2	['Rtp4', 'B2m', 'Rasgrp3', 'Irf2', 'Parp14', 'Arid4b', 'Zfp36l1', 'Tnks1bp1', 'Ifit1', 'Arhgap30', 'Fli1', '5430427O19Rik', 'Ccl5', 'Cd74', 'Rbck1', 'Xaf1', 'Isg20', 'Rab19', 'Timm8a1', 'Oas2', 'H2-K2', 'Fyb', 'Wars', 'Ccnd1', 'Fam26f', 'H2-M3', 'Acss1', 'Bank1', 'H2-D1', 'Trim26', 'H2-Q6', 'Il6ra', 'Rapgef4', 'Ppp1r16b', 'Grap', 'Trim8', '2700097O09Rik', 'Ap1s3', 'Rnf44', 'Erbb2', 'Arhgap25', 'L…	791	4
Nfkb2	['Cxcl10', 'Nfkbiz', 'Nfkbia', 'Nfkb2', 'Cxcr5', 'Smoc1', 'Rel', 'Ltb', 'Ccl5', 'H2-Aa', 'Tank', 'Map3k8', 'Cd74', 'Rictor', 'Rgs1', 'Cd69', 'Tslp', 'Eif2ak3', 'H2-K2', '5430427O19Rik', 'Neurl3', 'B2m', 'Fxyd2', 'Dusp6', 'Tnip1', 'Cd40', 'Ccl4', 'Ncf2', 'H2-K1', 'Csf1', 'Casp4', 'Psme2', 'Il1f9', 'H2-D1', 'Rnf31', 'Stk39', 'Msx1', 'H2-Q7', 'H2-Q6', 'Actn1', 'P2ry10', 'Rara', 'Brd2', 'Bcl3', 'Hive…	789	4
Tfdp1	['Mcm3', 'E2f8', 'Mcm6', 'Nolc1', 'E2f2', 'Rprd1b', 'Ranbp1', 'Mcm4', 'H2afv', 'Lig1', 'Uhrf1', 'Ssrp1', 'E2f1', 'Zfp367', 'Hnrnpul1', 'Mxd3', 'Topbp1', 'Pola1', 'Atad2', 'Gins2', 'Ncapg', 'Stag1', 'Suz12', 'Srsf2', 'Cdc6', 'Ipo7', 'Rfwd3', 'Mcmbp', 'Trmt6', 'Tcf19', 'Rbl1', 'Srsf1', 'Psat1', 'Lta4h', 'Gabpb1', 'Baz1b', 'Bub3', 'Dcp2', 'Sh3bp1', 'Psmb1', 'Wee1', 'Prps1', 'Mcm5', 'Gnai3', 'Patz1',…	744	4
E2f2	['E2f2', 'E2f1', 'E2f8', 'Cdc6', 'Pola1', 'Cdc25a', 'Rbl1', 'Topbp1', 'Uhrf1', 'Dtl', 'Cdk1', 'Hist1h2bm', 'Lig1', 'Mbnl3', 'Atad2', 'Myb', 'Smc3', 'Patz1', 'Trmt2a', 'H2afv', 'Fam76b', 'Kntc1', 'Arhgap11a', 'Agfg2', 'Zfp367', 'Gins3', 'Sart3', 'Clspn', 'Cdca7', 'Kbtbd7', 'Ric8b', 'Rprd1b', 'Hlx', 'Hist1h2bj', 'Hist1h2ag', 'Kif15', 'Arntl', 'Suz12', 'Hist1h2ak', 'Atxn7l3', 'Tal1', 'Nfkbil1', 'Pds…	707	4
E2f1	['Mcm6', 'E2f1', 'E2f8', 'Cdc6', 'Mcm3', 'Pola1', 'Cdc25a', 'Rbl1', 'Topbp1', 'Uhrf1', 'Ints7', 'Dtl', 'Mcm4', 'Lig1', 'Mcm5', 'Wee1', 'Atad2', 'Myb', 'Smc3', 'Kntc1', 'Arhgap11a', 'Ung', 'Huwe1', 'Ssrp1', 'Camta1', 'Ptma', 'Clspn', 'Cdca7', 'Foxred1', 'Hmgn5', 'Rprd1b', 'Hist1h2bj', 'Kif15', 'Arntl', 'Suz12', 'Hist1h2ak', 'Nfkbil1', 'Cbx3', 'Pds5a', 'Pdgfra', 'Gabpb2', 'Ankhd1', 'Zmynd8', 'Lpar4…	640	4
Nfyb	['Prr11', 'Narf', 'Pxmp4', 'Hist1h3c', 'Chek2', 'Ccng2', 'Cdc6', 'E2f8', 'Cdc23', 'Ints7', 'Dtl', 'Rpa2', 'Rabl3', 'Hmgb2', 'Aurka', 'Pnrc2', 'Ehf', 'Sp2', 'Smad2', 'Top2a', 'Ttf2', 'Ube2c', 'Lin52', 'H2afx', 'Cdk1', 'Terf1', 'Rbm14', 'Hist1h3g', 'Hist2h2be', 'Stil', 'Hnrnpa1', 'Etv4', 'Mcm3', 'Ect2', 'Fam76b', 'Tcerg1', 'Calm2', 'Arhgap11a', 'Hnrnpl', 'Taf15', 'Nek2', 'Suz12', 'Kif18b', 'Srsf2',…	559	4
Mxi1	['Zfp292', 'Picalm', 'Fam134a', 'Hnrnph2', 'Tsc1', 'Ube2q1', 'Atg3', 'Rragc', 'Rpusd4', 'Arfgef2', 'Nptn', 'Klf11', 'Slco3a1', 'Hnrnpd', 'Atp6v1h', 'Patl1', 'Dnajc13', 'Vac14', 'Glyr1', 'Sppl3', 'Arhgap12', 'Tnpo2', 'Tbcel', 'Mafg', '1810013L24Rik', 'Phf20l1', 'Slc38a7', 'Fnip1', 'Gigyf2', 'Brox', 'Fnip2', 'Usp31', 'Osbpl8', 'Synrg', 'Ubap2', 'Dazap2', 'Cc2d1b', 'Rps6ka4', 'Gnb2', 'Slc25a36', 'Hp…	536	4
Relb	['Nfkb2', 'Nfkbia', 'Gpbp1', 'Tnfaip3', 'Gadd45b', 'Cxcl10', 'Icam1', 'Gngt2', 'Relb', 'Map3k8', 'Dusp6', 'Cxcl1', 'Cxcr5', 'Cd69', 'Rel', 'Cxcl2', 'Tank', 'Tnip1', 'Cyld', 'Cd74', 'Rilpl2', 'Fchsd2', 'Tslp', 'Ccl5', 'Neurl3', 'Dusp5', 'Irf1', 'Ifngr2', 'Clock', 'Pou2f2', 'Ebf1', 'Dennd4a', 'Fas', 'Ptprj', 'H2-Q6', 'Map4k4', 'Psme2', 'Wac', 'H2-Aa', 'B2m', 'Cbll1', 'Slc38a1', 'H2-K2', 'Cxcl9', 'Z…	496	4
Pml	['Tnpo3', 'Epn1', 'Mettl6', 'Nr1h2', 'Tbc1d22a', 'Rps18', 'Pik3r4', 'Syvn1', 'Usf1', 'Sept1', 'Stk4', 'Ddx21', 'Gpsm3', 'Tmem41b', 'Zfp668', 'Polr2h', 'Isy1', 'Sart3', 'Ap1s2', 'Arpc3', 'Herc4', 'Hnrnpd', 'Klhl20', 'Phrf1', 'Leprotl1', 'Usp11', 'Thap2', 'Rpf2', 'Topbp1', 'Snrnp200', 'Tor1b', 'Lrrc47', 'Anks1', 'Sfswap', 'Bmp2k', 'C2cd3', 'Acin1', 'Brf2', 'Nek9', 'Zfp110', 'Cggbp1', 'Ap1b1', 'Psme…	482	4
Cebpe	['Lcn2', 'Camp', 'Hmgn2', 'S100a8', 'Cybb', 'Clec12a', 'Trem3', 'Igsf6', 'Ffar2', 'S100a9', 'Ltf', 'Hp', 'Lrg1', 'Ngp', 'Anxa1', 'Gca', 'Mpo', 'Pglyrp1', '1700020L24Rik', 'Plac8', 'Ethe1', 'Alox5ap', 'Cst7', 'Cdk6', 'Pygl', 'Hsd11b1', 'Gys1', 'Lmo4', 'Aldh3b1', 'C3', 'Slc25a12', '1700112E06Rik', 'Olr1', 'Ncam1', 'Flot1', 'Rgs18', 'Mmp9', 'Hk3', 'Slpi', 'F630028O10Rik', 'Pilrb1', 'Mapk14', 'Mxd1',…	479	4
Runx3	['Ptpn22', 'Gzmb', 'Xcl1', 'Gpr171', 'Tspan32', 'Rgs1', 'Runx3', 'Cytip', 'Ly9', 'Arhgap30', 'Cd160', 'Pou2f2', 'AI467606', 'Lat', 'Akap13', 'Arhgap15', 'Klrk1', 'Batf', 'P2ry10', 'Txk', 'Btla', 'Fmnl1', 'Dok2', 'Sla2', 'Tmem138', 'Gpr132', 'Pcgf5', 'Mkl2', 'Mpo', 'Smpd3', 'Rpl21', 'Napsa', 'Nkg7', 'Rnf19b', 'Plcxd2', 'Znrf2', 'Cd69', 'Lag3', 'Map3k14', 'Ctsw', 'Osgin2', 'Plcb2', 'Prf1', 'Il21r',…	474	4
Hcfc1	['Ubtf', 'Arfgef1', 'Prdm16', 'Stag2', 'Scaf11', 'Tnpo2', 'Arid1a', 'Pum2', 'Mdga1', 'Morc2a', 'Map3k5', 'Ankrd17', 'Ddx17', 'Zmiz1', 'Rprd1b', 'Tab2', 'Nf1', 'Gtf2a1', 'Pygo2', 'Nsd1', 'Xpot', 'Tmem229b', 'Sec23b', 'Bcor', 'Sos2', 'Thap11', 'Polr2a', 'Hist1h1b', 'Fam20b', 'Hcfc1', 'Lemd2', 'Hist1h2bb', 'Hnrnpul1', 'Ctcf', 'Fbxl20', 'Ankrd28', 'Fam83g', '2510039O18Rik', 'Tcerg1', 'Fbxo42', 'Mllt1…	417	4
Gabpa	['Cog3', 'Arfip1', 'Pyroxd1', 'Zfp410', 'Stk4', 'Vmp1', 'Map3k7', 'Tbc1d22a', 'Bag4', 'Gnai3', 'Sass6', 'Zbtb11', 'Fibp', '8430429K09Rik', 'Pcgf1', 'Rpe', 'Srpr', 'Hccs', 'Ddx21', 'Ino80b', 'Fam188a', 'Prpf3', 'Gabpa', 'Cdc37l1', '1110037F02Rik', 'Zbtb12', 'Ints1', 'Ddx19b', 'Zfc3h1', 'Chtf8', 'Larp4', 'Dbr1', 'Pacs1', 'Uggt1', 'Yme1l1', 'Snf8', 'Cggbp1', 'Aatf', 'Mark3', 'Riok3', 'Zfp513', 'Syf2…	378	4
Trp53	['Banp', 'Tial1', 'Nmt1', 'Bub1b', 'Pprc1', 'Zfp444', 'Snapc3', 'Vapa', 'Gtf2h4', 'Phf23', 'Zcchc8', 'Max', 'Chchd4', 'Nop14', 'Zw10', 'Cwc22', 'Jarid2', 'Cbll1', 'Bub3', 'Ahsa1', 'Wdr12', 'Phb', 'Rps27a', 'Clp1', 'Ipo7', 'Hscb', 'Chek2', 'Sf3b2', 'Rab1b', 'Cope', 'Ppcdc', 'Ttc13', 'Txlng', 'Csnk2a1', 'Zfp277', 'Pa2g4', '9130401M01Rik', 'Ints9', 'Hirip3', 'Ino80e', 'Serbp1', 'Abcf2', 'Men1', 'Fen…	362	4
Ctcf	['Lsm14a', 'Tlk1', 'Mmp16', 'Arid1a', 'Pum2', 'Ptp4a2', 'Cdk17', 'Ddx6', 'Zc3h4', 'Ankrd17', '1810026B05Rik', 'Tmem229b', 'Krcc1', 'Cggbp1', 'Ubtf', 'Tox', 'Rps6ka3', 'Ssbp2', 'Tle3', 'Arid1b', 'Cdc73', 'Rprd1b', 'Setd5', 'Atl2', 'Zfp384', 'Rbm15b', 'Smchd1', 'Stim1', 'Ntrk3', 'Rfwd2', 'Fam193b', 'Cnot2', 'C1galt1', 'Lrp6', 'Bcor', 'Pdzd8', 'Tia1', 'Nebl', 'Ep300', 'Usp7', 'Zer1', 'Dock11', 'Eif4…	353	4
Elf2	['Eaf1', 'Kti12', 'Trip4', 'Gabpa', 'Slc25a46', 'Ppp1r16a', 'Mdm4', 'Sec31a', 'Sfswap', 'Mfn1', 'Dpp8', 'Fbxo8', 'Thap2', 'Lrrc49', 'Zfc3h1', 'Zfp653', 'Ubr1', 'Edc4', '1810024B03Rik', 'Klhl20', 'Arfgap1', 'Pcgf1', 'Cdc37l1', 'Nf1', 'Papd4', 'Gba2', 'Kctd10', 'Ube3b', 'Usp38', 'Ino80b', 'Cttnbp2nl', 'Rrnad1', 'Foxred1', 'Sec24c', 'Dcaf10', 'Lrrc41', 'Utp14a', 'Zkscan1', 'Wdr76', 'Pcyt1a', 'Uvrag'…	317	4
Elk4	['Cog3', 'Ppp4c', 'Eaf1', 'Srbd1', 'Sfswap', 'Trip4', 'Kctd2', 'Senp7', 'Ncstn', 'Zbtb11', 'Kdm5c', 'Dnajc14', 'Fbrsl1', 'Sh3gl1', 'Armcx3', 'Ppfibp1', 'Aqr', 'Pigc', 'Sp3', 'Pigo', 'Kdm3b', 'Atxn2', 'Szt2', 'Ern1', 'Hnrnpa0', 'Tpp2', 'Uggt1', 'Aftph', 'Lars', 'Zdhhc5', 'AI504432', 'Hif1an', 'Pygo2', 'Mef2a', 'Prpf6', 'Nicn1', 'Fbxl14', 'Elk4', 'Arid4a', 'Zbtb43', 'Ddx6', 'S100pbp', 'Zfyve26', 'H…	301	4
Kdm5a	['Hexim2', 'Rbm15b', 'Rxrb', 'Usp6nl', 'Thap2', 'Rbm25', 'Xpo6', 'Chfr', 'Ddx6', 'Tnrc6b', 'Rprd1a', 'Mcmbp', 'Arid4a', 'Dido1', 'Kptn', 'Sart3', 'Dlg1', 'Wipf2', 'Fam193b', 'Tug1', 'Pum2', 'Baz1b', 'Prepl', 'Rnf44', 'Gnaq', 'Necap1', 'Stag1', 'Usp34', 'Nsf', 'Brd4', 'Bptf', 'Preb', 'Zfp747', 'Prr12', 'Asxl1', 'Zzz3', 'Pds5b', 'Vezf1', 'Lsm14b', 'N4bp1', 'Rock1', 'Malat1', 'Kif13a', 'Ctdnep1', 'T…	299	4
Eomes	['Orc4', 'Lsm1', 'Ppme1', 'Cd2bp2', 'Slc9a3r1', 'Polr2h', 'Csnk1g1', 'Synrg', 'Coro1c', 'Ssr2', 'Fbxl12', 'Alkbh3', 'Nbr1', 'Mfap1a', 'Pomp', 'Ttc1', 'Stk4', 'Vta1', 'Slc25a17', 'Hspbp1', 'Itpa', 'Psmc5', 'Kifc5b', 'Cbfa2t3', 'Hcst', 'Mrpl3', 'Hat1', 'Rpl19', 'Dusp6', 'E130308A19Rik', 'Hsbp1', 'Sema4a', 'Prpf18', 'Zfp277', 'Rps25', 'Trappc4', 'Kctd1', 'Parg', 'Med6', 'Stat5b', 'Tgif2', 'Ift20', '…	292	4
Usf1	['Zfp292', 'Hnrnph2', 'Tmem55b', 'Ilf3', 'Zzz3', 'Dhx35', 'Atp6v1h', 'Rragc', 'Orai2', 'Rabgap1', 'Brox', 'Rbm15b', 'Stx6', 'Tnpo2', 'Bloc1s3', 'Scamp3', 'Cc2d1b', 'Mafg', 'Fbxo33', 'Fam192a', 'Ppp1r3b', 'Dnmt3a', 'Txlng', 'Relb', 'Vps16', 'Dip2b', 'Gnb2', 'Vac14', 'Mms19', 'Rara', 'Rc3h2', 'Pdp1', 'Hif1a', 'Usp28', 'Supv3l1', 'Clcn7', 'Slc12a7', 'Tmem108', 'Mlx', 'Mef2a', 'Eftud2', 'Rnf44', 'Pik…	287	4
Etv3	['Kti12', 'Tnpo3', 'Ctnna1', 'Pik3r5', 'Gga1', 'Usp38', 'Dph2', 'Arfip1', 'Irf1', 'Gnai3', 'Srsf5', 'Bcl2a1b', 'C1qc', 'Spata2', 'Cd68', 'Sh3bgrl', 'Sptlc2', 'Bcl2a1d', 'Bcl2a1a', 'Sec24c', 'Rasgrp3', 'Kdm2b', 'Dennd4b', 'Etv6', 'Stab1', 'Nckap1l', 'Dnajc14', 'Cggbp1', 'Cd14', 'Plcb2', 'Rnase6', '1110059E24Rik', 'Cblb', 'M6pr', 'Trerf1', 'Stat5a', 'Apobr', 'Dennd1b', 'Vcpip1', 'Ap1b1', 'Lyn', 'Sm…	235	4
Irf3	['Dolpp1', 'Plcxd2', 'Slc25a35', 'Bloc1s3', 'Hist1h2bg', 'Ogfod1', 'Tysnd1', '9930104L06Rik', 'Qpctl', 'Txnl4b', 'Aph1a', 'Orai1', 'Stx16', 'Actr1a', 'Pi4kb', 'Gatad2a', 'Mga', 'Zfp217', 'Qser1', 'Usp4', 'Eif4enif1', 'Akt2', 'Axin1', 'Ankhd1', 'R3hdm2', 'Slc37a4', 'Pgpep1', 'Arpc5l', 'Mettl3', 'Dpep2', 'Csnk1g2', 'Lrrc8d', 'Ogt', 'Fcho1', 'Pigu', 'Ezh1', '2210016F16Rik', 'Ubap1', 'Pprc1', 'Dtx2',…	234	4
Sin3a	['Tnpo3', 'Ppp4c', 'Arfip1', 'Gabpa', 'Nr1h2', 'Chd2', 'Stk4', 'Mtmr4', 'Dpp8', 'Parg', 'Ubox5', 'Daxx', 'Ttpal', 'Chchd5', 'Nudt5', 'Herc4', 'Phrf1', 'Zfc3h1', 'Rsl24d1', 'Med14', 'Acin1', 'Uvrag', 'Mtx3', 'Poll', 'Klhl18', 'Il11ra1', 'Yipf4', 'Kifc5b', 'Zfpl1', 'Aftph', 'Trappc8', 'A130010J15Rik', 'Arhgap27', 'Zbtb45', 'Dbr1', 'Fli1', 'Cstf1', 'Npat', 'Rrp12', 'Rfx3', 'Secisbp2', 'Prpf18', 'Ubr…	233	4
Mef2d	['Pik3cb', 'Trim8', 'R3hdm2', 'Zfp521', 'Itpkb', 'Ubtf', 'Ep300', 'Mef2d', 'Spen', 'Zbtb7a', 'Qrich1', 'Mdm4', 'Stx16', 'Maml3', 'Bcor', 'Gnb1', 'Smad7', 'Tob2', 'Slc44a2', 'Smad3', 'Ino80d', 'Gatad2a', 'Zdhhc8', 'Tmem65', 'Zfp592', 'Rap1gap2', 'Sp3', 'Mbd5', 'Sirt4', 'Mga', 'Ankhd1', 'Ankrd40', 'Osbpl6', 'Baz1b', 'Cep250', 'Arf6', 'Dnase1l1', 'Stat5b', 'St6galnac6', 'Gse1', 'Slc39a13', 'Lix1l', …	209	4
Gfi1	['Cnot1', 'Slco3a1', 'Asf1b', 'E2f8', 'Fmnl3', 'Prr11', 'Hnrnpul1', 'Agfg2', 'Elmo1', 'Hist1h1b', 'Ect2', 'Top2a', 'S100pbp', 'Smad2', 'Nup88', 'Ccng2', 'Ncapd2', 'Mis12', 'Arntl', 'Nceh1', 'Zswim4', 'Runx1', 'Kcnab2', 'Ints7', 'Dtl', 'Hnrnpa0', 'Stil', 'Gnai2', 'Bicd2', 'Trim45', 'Hexim1', 'Fam117a', 'Sp1', 'Suz12', 'Recql', 'Ezh2', 'Drosha', 'Cirbp', 'Cdk1', 'Cdc45', 'Tbccd1', 'Larp4b', 'Pif1',…	185	4
Setdb1	['Ap2s1', 'Prcc', 'Snx27', 'Ttc13', 'Tbc1d8b', 'Pgm2l1', 'Cope', 'Daam1', 'Brms1l', 'Tmed5', 'Slc38a9', 'Klhl24', 'Mfsd11', 'Gtpbp8', 'Ctif', 'Med24', 'Ywhag', 'Wdr59', 'Nkiras1', 'Dtx2', '9930104L06Rik', 'Lztr1', 'Terf2', 'Cand1', 'Trak2', 'Acad8', 'Pank3', 'Zfp691', 'Tmem206', 'Cdc26', 'Kctd17', 'Gpr108', 'Ick', 'Ufsp2', 'Ctns', 'Ccdc77', 'Mrps22', 'Kpna1', 'Trim32', 'Apobr', 'Ciao1', 'Map3k10'…	185	4
Cebpz	['Pik3cb', '4931414P19Rik', 'Ddx27', 'Mga', 'Cnot1', 'Nol6', 'Rps10', 'BC030867', 'Tnrc6b', 'Dpep2', 'Gjc1', 'Tmcc1', 'Rabgef1', 'Ubap1', 'Pprc1', 'Dtx2', 'Cwc25', 'Rps27', 'Phf20', 'Mettl16', 'Slc25a20', 'Naa25', 'Tspan12', 'Stat5a', 'Ddit4', 'Eif5a', 'Heatr3', 'Ebf2', 'Zfp532', '2810006K23Rik', 'Slc25a19', 'Upf2', 'Eif2s2', 'Npepps', 'C2', 'Zc3h18', 'Mpzl1', 'Sbno1', 'Npm1', 'Tada2a', 'Sec14l1'…	178	4
Yy1	['Prkcsh', 'Hcfc1', 'Phf8', 'Thap2', 'AU040320', 'Ddx17', 'Ikzf5', 'Tnrc6b', 'Zc3h6', 'S100pbp', 'Stag1', 'Nrf1', 'Sppl3', 'Cog1', 'Bptf', 'Nbea', 'Sec23b', 'Pds5b', 'Ankrd13c', 'Zfp764', 'Stk40', 'Jarid2', 'Phf12', 'Tor1b', 'Kif15', '1110059G10Rik', 'Lrsam1', 'R3hdm1', 'Gtf2h1', 'Zfp518a', 'Baz1a', 'Cln3', 'Malat1', 'Cep250', '2810403A07Rik', 'Tollip', 'Phf19', 'Rundc1', 'Med14', 'Cul3', 'Actr3b…	178	4
Gtf2b	['Gsk3b', 'Katnb1', 'H3f3b', 'Leng1', 'Nfya', 'Cyld', 'Mtmr4', 'Hspa5', 'Bahd1', 'Dnajc7', 'Agpat1', 'Fam46b', 'Recql', 'Zbtb5', 'Manf', 'Spsb3', 'Kctd9', 'Zfp91', 'Hist1h3c', 'Nup88', 'Ccnb2', 'Fut8', 'Ppm1b', '1700056E22Rik', 'Gata2', 'Derl3', 'Far1', 'Cdca3', 'Immp1l', 'Pcsk4', 'Lrp8', 'Brd8', 'Pik3r3', 'Ppp6r3', 'Slc25a28', 'Dcun1d4', 'Cdkl2', 'Pcna', 'Agbl5', 'Zfp367', 'Gbf1', 'Rbbp4', '2610…	168	4
Nr2c2	['Zfp384', 'Zcchc6', 'Cggbp1', 'Ino80b', 'Zfp668', 'Kif4', 'Synrg', '1700084E18Rik', 'Nf1', 'Nek9', 'Hipk1', 'Per2', 'Strn', 'Atm', 'Npat', 'Suds3', 'Acbd5', 'Ccdc134', 'Map3k11', 'Dcaf10', 'Socs7', 'Dr1', 'Szt2', 'Sco1', 'Fam149b', 'Ccdc9', 'Trim44', 'Eif5a2', 'Gcc2', 'Oraov1', 'Fbxo33', 'Zfp688', 'Cenpo', 'Cblb', 'Ercc3', 'Zfp113', 'Arhgap27', 'Nup54', 'Asb3', 'Zc3h10', 'Ubn2', 'Trim39', 'Eml3'…	164	4
Arid3a	['Pik3cg', 'Camp', 'Lims1', 'Mctp1', 'Tnni2', 'Cradd', 'Chd2', 'Bin3', '2010204K13Rik', 'Hmgn2', 'Arhgap25', 'Rac2', 'Samsn1', 'Abr', 'Arhgap30', 'Stap1', 'Laptm5', 'Cd68', 'Gpsm3', 'Rhog', 'Ncf2', 'Wdr26', 'Ncf4', 'Lmo4', 'B430306N03Rik', 'Syne1', 'Cxcr2', 'Ffar2', 'Zfp513', 'Rnf144b', 'Nes', 'Hsd11b1', 'Siglece', 'Tnfaip8l2', 'Rap2c', 'Tbkbp1', 'Dennd4b', 'Fcgr4', 'Sell', 'Inpp4a', 'Fgd4', 'Map…	151	4
Nr3c1	['Per3', 'Brd4', 'Dyrk1a', 'Fbxw7', 'Smad3', 'Rock1', 'Cic', 'Zhx2', 'Rfwd2', 'Atf7ip', 'Fam193b', 'Arfgef1', 'Rps6ka3', 'Tnks2', 'Pip4k2b', 'Zzef1', 'Zc3h4', 'Vezf1', 'Pskh1', 'Chd8', 'Zfp592', 'Tpcn1', 'N4bp1', 'Pik3c3', 'Stag2', 'Sos2', 'Rasa1', 'Abca1', 'Rab3gap2', 'Slk', 'Rere', 'Patl1', 'Pik3c2a', 'Dicer1', 'Stim1', 'Bahcc1', 'Pld1', 'Tnrc6c', 'Atxn7', 'Ncoa2', 'Map3k1', 'Fryl', 'Dmxl1', 'O…	148	4
Rest	['Gng3', 'Lrrc41', 'Slc7a7', 'Ddx6', 'Cradd', 'Ep300', 'Rbm39', 'Zc3h6', 'Ap1g1', 'Cnot3', 'Sbno1', 'Farsa', 'Rsrc2', 'Mcmbp', 'Dhx15', 'Nfyc', 'Wasl', 'Ubr5', 'Rbm25', 'Brd4', 'Nufip2', 'Cecr2', 'Naa15', 'Fkrp', 'Mettl16', 'Ndrg3', 'Rnf26', 'Smc4', 'Atp8b2', 'Aplp1', 'Matr3', 'Eif4a1', 'Ndc80', 'Tet2', 'Prrc2c', 'Utp20', 'Taf3', 'Fiz1', 'Npm1', 'Mark3', 'Bptf', 'Eif3a', 'Pum1', 'Cacybp', 'Ube4b'…	143	4
Sp4	['Cdc40', 'Polr3e', 'Rab11fip1', 'Cenpq', 'Sirt6', 'Uvrag', 'Sh2d3c', 'Slc25a28', 'Nlk', 'Cbx8', 'Slc16a10', 'Rprd2', 'Ranbp10', 'Haus8', 'Hdgfrp2', 'Cnnm3', 'Arhgap26', 'Tpst2', 'Epc1', 'Mta3', 'Arid4a', 'St8sia4', 'Gtpbp1', 'Sirt7', 'Zfp143', 'Wdr44', 'Pola1', 'Slain2', 'Ptger4', 'Zfp385b', 'Vamp1', 'Bloc1s3', 'Lpin3', 'Mnt', 'C2cd2l', 'Herc1', 'Mdn1', 'Papolg', 'Nab1', 'Fbrs', 'Gphn', 'Ikzf2',…	117	4
Stat5a	['Stat5b', 'Runx1', 'Edem2', 'Mbd5', 'Zfp235', 'Sub1', 'Arhgef6', 'Taf4b', 'Ly96', 'Casp2', 'Fli1', 'Rab30', 'Rara', 'Barx2', 'Arsb', 'Ap2s1', '9930104L06Rik', 'Ppp6c', 'Lace1', 'Znrf3', '9330020H09Rik', 'Aamp', 'Clpb', 'Sdccag8', 'Slc35b4', 'Ddx49', 'Ints9', 'Arv1', 'Hscb', 'Nedd8', 'Lin37', 'Hsd17b4', 'Mrpl54', 'Zw10', 'Ube2h', 'Hexim2', 'Gpr108', 'Kpna3', 'Slc25a19', 'Ufsp2', 'Cdc26', 'Tsta3',…	108	4
E2f7	['E2f8', 'Uhrf1', 'Hells', 'Gins3', 'Pola1', 'Ncapg', 'Rfwd3', 'Kntc1', 'Mcm8', 'Tcf19', 'Rbl1', 'Hist2h4', 'Nfkbil1', 'Hist1h2bm', 'Rad51ap1', 'Orc1', 'Cenpm', 'Brca1', 'Cntln', 'E2f7', 'Hist4h4', 'Hist1h2bb', 'Mis12', 'Iqgap3', 'Fam109b', 'Mastl', 'Hist1h2an', 'Ccne2', 'Ezh2', 'Oip5', 'Foxm1', 'Hist1h1b', 'Cep55', 'Chaf1a', 'Fbxo5', 'Smc2', 'Exosc2', 'Fgf13', 'Plk1', 'Brip1', 'Uba6', 'Kif11', '…	104	4
Sp3	['Nup98', 'Ccng2', 'Sp1', 'Cdc40', 'Uhrf2', 'Arih1', 'Sept9', 'Mier1', 'Rassf7', 'Slc5a6', 'Sh2b3', 'Satb1', 'Chd8', 'Phf21a', 'Phf8', 'Aftph', 'Ldb1', 'Sec14l2', 'Gnb2', 'Grasp', 'Yes1', 'Med30', 'Stag1', 'Tcf7', 'Pisd', 'Mecp2', 'Sec63', 'Ensa', 'Wdr44', 'Osbpl8', 'Prr12', 'Atxn7l3', 'H3f3a', 'Trerf1', 'R3hdm2', 'Lrrc8d', 'Pdgfrb', 'Tob2', 'Irx3', 'Spop', 'Rev3l', 'Grap2', 'Ctdsp1', 'Arhgef2', …	101	4
Nfe2	['Amdhd2', 'Fam134a', 'Atg3', 'Naa40', 'Mafg', 'Sgol1', 'Hps1', 'Glyr1', 'Slc36a1', 'Ankrd12', 'Aldh3b1', 'Gnb2', 'Foxm1', 'Unc93b1', 'Wdr81', 'Taf6l', 'Git2', 'Rab24', 'Spg21', 'Nup188', 'Vac14', 'Tbc1d5', 'Ap1s2', 'Pum2', 'Phf20l1', 'Agtrap', 'Osbpl8', '6430548M08Rik', 'Eef2k', 'Nagpa', 'Fbxo10', 'Tmc6', 'Ffar2', 'Arpc5', 'Ccdc125', 'Calr', 'Farsa', 'Tln1', 'Grn', 'Plcg2', 'Slc31a2', 'Mcm2', 'M…	100	4
Elk1	['Det1', 'Mysm1', 'Sgsm1', 'Dars2', 'Aph1b', 'Atp1a3', 'Src', 'Srsf4', 'Snap23', 'Gpatch8', 'Wdr74', 'Usp16', 'Asb6', 'Stk11ip', 'Nkiras1', 'Dpep2', 'Socs5', 'Blm', 'Apc', 'Map2k5', 'Casd1', 'Aldh1l1', 'Npat', 'Dpy19l1', 'Dohh', 'Hist1h4i', 'Rnf185', 'AI464131', '5430405H02Rik', 'Rnf123', 'Strn', 'Setd6', 'Tgds', 'Hibch', 'Atg13', 'Gtf2h2', 'Trit1', 'Casp9', 'Tnni3', 'Micall2', 'Zfp219', 'Agap3',…	94	4
Mecp2	['Atg16l1', 'Otud7b', 'Fam188a', 'Edem3', 'Nek9', 'Mlycd', 'Bmp2k', 'Cog3', 'Fbxo32', 'Gnptab', 'Cacna1a', 'Cdc42ep2', '2410004B18Rik', 'Rbbp6', 'Rgs7bp', 'Tle4', 'Tada3', 'Trip4', 'Sfswap', 'G3bp2', 'Usp3', 'Tead3', 'Rprd1b', 'Parg', 'Nr1h2', 'Phrf1', 'Foxj3', 'Rbbp5', 'Zdhhc17', 'Papd4', 'Polr2a', 'Map4k3', 'Sp3', 'Tnrc6c', 'Irx3', 'Elac2', 'Pigt', 'Repin1', 'Pbx2', 'Shoc2', 'Smad6', 'Syvn1', '…	90	4
Nfya	['Kcnab2', 'Osbp', 'Mtmr4', 'Hist1h3c', 'Pwwp2a', 'Kpna4', 'Recql', 'Arl15', 'Kdm3a', 'Cdr2', 'Nup88', 'Hist2h2be', 'Arid4a', 'Mtmr12', 'Elk1', 'Hnrnpa0', 'Arhgap26', 'Xpo1', 'Tulp3', 'Sdf2l1', 'Pif1', 'Nr2c2', '0610010F05Rik', 'Dusp10', 'Zfp367', 'Rnd1', 'Ppp2r5c', 'Med30', 'Spag9', 'Sf1', 'Pcf11', 'Tpp2', 'Zdhhc5', 'Btbd3', 'Bhlhe41', 'Abat', 'Ccdc51', 'Gatad2a', 'Dlg2', 'Cdc14b', 'Slc9a5', 'Un…	76	4
Stat5b	['Tmed5', 'Rab30', 'Rbak', 'Stag1', 'Zfp84', '9130011E15Rik', 'Stat5a', 'Asb6', 'E2f3', 'Ino80', 'Lin37', 'Wipf1', 'Bcl6', 'Rab27a', 'Polk', 'Zfp384', 'Vps53', 'Gnptab', 'Snx14', 'Rasef', 'Kri1', 'H2-D1', 'Ppp3r1', 'H2-K1', 'Zc3hav1', 'Nudt13', 'Fam188a', 'Cog3', 'Ddx23', 'Mbd1', 'Plekha3', 'Sav1', 'Rnf167', 'Kcnk6', 'Zfp62', 'B430306N03Rik', 'Rftn1', 'Nme2', 'Eif2s3x', 'Mmachc', 'E2f8', 'Sec24c'…	69	4
E2f6	['Zbtb12', 'Ankhd1', 'Sin3a', 'Stag1', 'Fhod1', 'Srsf1', 'Sympk', 'Mbnl3', 'Lztr1', 'Zfp142', 'Ptpn4', 'Nup214', 'Med14', 'Iws1', 'Stag2', 'Ankrd10', 'Iqcd', 'Mis12', 'Fbxo46', 'Tmem143', 'Flad1', 'Zfpl1', 'Pds5b', 'Gse1', 'Phf20', 'Smc3', 'Cbx2', 'Lsg1', 'Bclaf1', 'Spred1', 'Fam173b', 'Kdelc2', 'Cdc23', 'Tmub2', 'Disp1', 'Atf6', 'Zfp292', 'Cenpb', 'Fam135a', 'Pten', 'Calm1', 'Lrig1', 'Ss18', 'Pd…	68	4
Pou2af1	['Atf7ip', 'Pou2f1', 'Cd180', 'Prkcb', 'Mmp9', 'Mef2d', 'Tspan13', 'Csk', 'Bcl11a', 'Itpr3', 'Ptpn6', 'Ebf1', 'Foxp1', 'Lyn', 'Arhgap25', 'Acbd4', 'Espn', 'Gcnt2', 'Csrp2', 'Sema4a', 'St6gal1', 'Grk6', 'Ralgps2', 'Pim1', 'Fcho1', 'Ero1lb', 'Lck', 'Cd55', 'Pde7a', 'Map4k1', 'Spib', 'Arhgap4', 'Atp2a3', 'Cd79b', 'Cpsf2', 'Samsn1', 'Lrmp', 'Pim2', 'Tnrc6b', 'Cables2', 'Elf3', 'Abi3', 'Foxp4', 'Zc3h1…	58	4
Sp1	['Ube3b', 'Smad6', 'Osbp', 'Sin3a', 'Pard6b', 'Hspa13', 'Zfp275', 'Sp1', 'Frmd6', 'Vegfa', 'Htt', 'Ubr5', 'Serinc5', 'Phc2', 'Rnf44', 'Mkrn2', 'Chrnb1', 'Hhip', 'Pip4k2b', 'Plec', 'Vamp1', 'Cog1', 'Scaf4', 'Rbm15b', 'Vkorc1l1', '2900060B14Rik', 'Pigv', 'Col4a3bp', 'Nbeal2', 'Ube4a', 'Psme4', 'Mapk7', 'Echdc3', 'Nphp3', 'Arid1a', 'Larp1', 'Zfp800', 'Zfp217', 'Lrrc1', 'Dpy19l1', 'Rgl2', 'Zfp319', '…	55	4
Rxrb	['Mbtd1', 'Dnajb5', 'Srd5a3', 'Casp9', 'Rxrb', 'Foxk1', 'Lemd2', 'Nhsl1', 'Rnf145', 'Cdk12', 'Etl4', 'Utp14b', 'Snw1', 'Abcg1', 'Ece2', 'Nfkbie', 'Fasn', 'Myh11', 'Palld', 'Mcoln1', 'Cux1', 'Nuak2', 'Tex2', 'Lad1', 'Ivns1abp', 'Irf6', 'Pik3ca', 'Lrrc47', 'Cd99l2', 'Csk', 'Dlg2', 'Kctd20', 'Nrgn', 'Tmem108', 'Nudt3', 'Sh3rf1', 'Trmt2b', 'Igsf3', 'Cant1', 'Cpt1a', 'Spast', 'Zbtb7b', 'Fam102b', 'Pap…	50	4
Gmeb2	['Gabpb2', 'Cdkn2c', 'Fam160a2', 'Topors', 'Gmppb', 'Cpeb2', 'Foxred1', 'Xrn2', 'Usp21', 'Sumo2', 'Cox18', 'Ccdc138', 'Hhip', 'Fem1a', 'Cdk13', 'Rabgef1', 'Hlf', 'Pus10', 'Mtm1', 'Prpf18', 'Trappc8', 'Lrig2', 'Zbtb11', 'Sec23b', 'Fmr1', 'Thumpd2', 'Mthfr', 'Mast4', 'Eif4g1', 'Zzz3', 'Pus7l', 'Cdc73', 'Rad51c', 'Sertad3', 'Tmf1', 'Becn1', 'Lrp4', 'Arrb1', 'Hist1h4h', 'Ranbp6', 'Zmym2', 'Sptlc1', '…	48	4
Lef1	['Skap1', 'Gm11346', 'Satb1', 'Il7r', 'Bcl11b', 'Sh3kbp1', 'Dapl1', 'Itk', 'Sh2d1a', 'Cd247', 'Lef1', 'Dusp10', 'Cd28', 'Tcf7', 'Il2rg', 'Rhoh', 'Ets1', 'Zap70', 'Zfp281', 'Gpbp1l1', 'Gata3', 'Tox', 'Scml4', 'Mdm4', 'Epc1', 'Tmem108', 'Stk4', 'Sesn3', 'Ablim1', 'Rcan3', 'Frrs1', 'Clec2i', 'Kpna4', 'Herc3', 'Trib2', 'Ldb1', 'Il21r', 'Gpr183']	38	4
Batf	['Vps37b', 'Traf1', 'Stk24', 'Tnfaip8', 'Mbnl1', 'Gzmb', 'Apbb1ip', 'Ccl5', 'Rps29', 'Dusp2', 'Emb', 'Ptprc', 'Runx1', 'Cxcr3', 'Runx3', 'H2-Q7', 'Psmb9', 'Epsti1', 'Xcl1', 'Srgn', 'Ptpn1', 'Actr3', 'Cxcr6', 'Il2rb', 'Traf3', 'Tank', 'Arid5a', 'Ipcef1', 'Elf1']	29	4
Bdp1	['Rbm6', 'Mdfic', 'Pdcd4', 'Eif2d', 'Ampd2', 'Svep1', 'Acrbp', 'Spice1', 'Nin', 'Stard3', 'Pex16', 'Gan', 'Tmem115', 'Heatr3', 'Sacm1l', 'Urb1', 'D930016D06Rik', 'Dnmbp', 'Bdp1', 'Slc38a9', 'Ccno', 'Atp6v0a1', 'Zhx2', 'Napg', 'Hbs1l', 'Lin7c']	26	4
Gmeb1	['Rfx1', 'Hmg20a', 'Ctdp1', 'Adpgk', 'Foxred1', 'Zdbf2', 'Bre', 'Prepl', 'Xpo7', 'Hoxb6', 'Fam160a2', 'Smarcad1', 'Fam71e1', 'Ccdc138', 'Mitf', 'Ranbp6', 'Rapgef6', 'Siah1b', 'Xrn2', 'Mmgt1', 'Spock2', 'Pdzd8', '1810030O07Rik', 'Las1l', 'Haus5', 'Als2']	26	4
Hsf1	['Klhl26', 'Pip5k1b', 'Aldh1a3', 'Zw10', 'Lnpep', 'Sfmbt2', 'Ssbp1', 'Pag1', 'Rad52', 'Dbr1', '5430427O19Rik', 'Cars2', 'BC017158', 'Sik2', 'Kif16b']	15	4
Foxp1	['Foxp1', 'Cd79b', 'Mef2c', 'Pou2af1', 'S1pr1', 'Ms4a1', '4930523C07Rik', 'Zcchc11', 'Sesn1', 'Phip', 'Hdac7', 'Filip1l', 'Chd3']	13	4
Tcf7	['Lef1', 'Tcf7', 'Nebl', 'Bcl11b', 'Il7r', 'Cd4', 'Sh2d1a', 'Prkcq', 'Satb1', 'Sept1', 'Ccr9']	11	4
Stat6	['Gen1', 'Vps53', 'Prickle3', 'Mysm1', 'Il10rb', 'Sec24c', 'Pfn1', 'Anxa7', 'Plcl2', 'Actr6']	10	4
Usf2	['Fbxw4', 'Vma21', 'Rufy1', 'Dhdds', 'Pdp2', 'Cnpy3', 'Dpagt1', 'Usf2', 'Rab5c', 'Rai1']	10	4
Tcf12	['Gigyf2', 'Vps33a', 'Rbm15b', 'Trpm7', 'Kdm6a', 'Fmr1', 'Rc3h2', 'Nsd1', 'Rabgap1']	9	4
Ep300	['Rnf44', 'Heca', 'D17Wsu92e', 'Fdxacb1', 'Tle4', 'Atg2b', 'Zfp710']	7	4
Rara	['Rara', 'Ptpro', 'Doc2g', 'Papd4', 'Cd300lb', 'Rprd2', 'Pik3r6']	7	4
Patz1	['Bahd1', 'Patz1', 'Sertad3']	3	4
Gata2	['Mitf', 'Lims1', 'Stc1', 'Vwf', 'Itga2b', 'Ikzf2', 'P2rx1', 'Spns3', 'Lgals4', 'Sox17', 'Plvap', 'Myct1', 'Runx1', 'Anxa9', 'Calr', 'Icam2', 'Ubxn8', 'Pcp4l1', 'Abcb4', 'Egfl7', 'Nos3', 'Tcf15', 'Slc38a4', 'Sdpr', 'Kank3', 'Olr1', 'Espn', 'Cbfa2t3', 'Osbpl8', 'Fut8', 'Tmem100', 'Aqp3', 'Padi2', 'Hist1h3c', 'Apold1', 'Mpo', 'Rasip1', 'Arhgap31', 'Mmrn2', 'Ccl4', '4931406P16Rik', 'Mapk1ip1l', 'Tnf…	505	5
Tal1	['Lmo2', 'Fam117a', 'Egfl7', 'Itga2b', 'Alas2', 'Crlf3', 'Hemgn', 'Tspan8', 'Apobec2', 'Klf1', 'Tfdp2', 'Anxa9', 'Slc39a8', 'Suv39h1', 'Lbr', 'Cpox', 'Epor', 'Asf1a', 'Isg20', 'Cenpk', 'Art4', 'Pabpc4', 'Scoc', 'Rnf123', 'Arrb1', 'Pcyox1l', 'Atg4d', 'Tnfrsf23', 'Ssbp2', 'Slc11a2', 'Ninl', '1600002H07Rik', 'Ftl1', 'Acsl5', 'Fam126a', 'Sh2d4a', 'Pkig', 'Rad23a', 'Pwp2', 'Donson', 'Mllt3', 'Slc43a1'…	270	5
Taf7	['Yy1', 'Gng3', 'Slc7a7', 'Usf1', 'Hexim2', 'Cdk5rap2', 'Zc3h6', 'Daxx', 'Cnot3', 'Rsrc2', 'Rbm39', 'Ap4s1', 'Sf3a1', 'Ndc80', 'Kdm3a', 'Dhx15', 'Csnk1a1', 'Tet2', 'Cradd', 'Mettl16', 'Farsa', 'Pabpn1', 'Pum1', 'Utp20', 'Rpap1', 'Zfp507', 'Fiz1', 'Arnt', 'Usp47', 'Cecr2', 'Naa15', 'Prrc2c', 'Topors', 'Rbm25', 'Csnk2a1', 'Set', 'Cwc27', 'Ctcf', 'Kptn', 'N4bp2l2', 'Egln3', 'Chd6', 'Klf3', 'Radil', …	230	5
Hdac2	['Tagln3', 'Zfhx2', 'Mpped2', 'Bhlhb9', 'Sox11', 'Gap43', 'Rbmx', 'Uchl1', 'Nanos3', 'Zfp579', 'Zfp775', 'Rcor2', 'Smarcd1', 'Meis2', 'Sox4', 'Foxp2', 'Tuba1b', 'Eif5a', 'Bclaf1', 'Rab3a', 'Celf4', 'Hnrnph1', 'Tmem108', 'Npm1', '2810006K23Rik', 'Bcl11a', 'Zfp711', 'Rbbp4', 'Syncrip', '1700123O20Rik', 'Mapt', 'Hmgb1', 'Nrn1', 'Ccar1', 'Ebag9', 'B3galnt1', 'Snrnp70', 'Nono', 'Zfp664', 'Aatf', 'Tubb…	151	5
Tead4	['Rhod', 'Ctnna1', 'Id2', 'Gna15', 'Sec14l1', 'Amotl2', 'Nlrx1', 'Lrrc59', 'Mmgt1', 'Crb3', 'Rrp12', 'Prkcsh', 'Grwd1', 'Aldoa', 'Amph', 'Gcat', 'Itga3', 'Tmem104', 'Jup', 'Smchd1', '5330417C22Rik', 'Wnt6', 'Hmbox1', 'Pfkfb1', '2310030G06Rik', 'Spats2', 'Snai3', 'Cyb561d2', 'Sfn', 'Rps12', 'Tead4', 'Uaca', 'Npat', 'Etv4', 'Pdrg1', 'Acta2', 'Rnf20', 'Klhdc4', 'Tead1', 'Polr3g', 'Upp1', 'Mtap', 'Rg…	150	5
Klf1	['Blvrb', 'Tpcn1', 'Apeh', 'Sec14l2', 'Nmnat3', 'Eif2ak1', 'Atp1b2', 'March2', 'Stx2', 'Asf1a', 'Urod', 'Afg3l2', 'Leprot', 'Isca2', 'Cited4', 'Pitrm1', 'B3galnt2', 'Bcap31', 'Adk', 'Bard1', 'Mospd1', 'Xpnpep1', 'Tfdp2', 'Mrps36', 'Tarsl2', 'Mrps14', 'B9d2', 'Atp5g1', 'Stom', 'Oaz1', 'Cercam', 'Ell2', 'Brpf3', 'Rpl35', 'Polr3h', '2700097O09Rik', 'Prdx3', 'Rad54l', 'Ap1b1', 'Parn', 'Epor', 'Idh3a'…	66	5
Pbx3	['Katnb1', 'Pou3f3', 'Cadm1', 'Etv5', 'Gart', 'Mvk', 'Rbm4', 'Slc2a8', 'Clec16a', 'Etv4', 'Mff', '4931428F04Rik', 'Isl1', 'Nanos1', 'Arhgap33', 'Aurka', 'Gan', 'Zfp597', 'Arf2', 'Fdft1', 'Zfp90', 'Epm2aip1', 'Klhl25', 'Lgmn', 'Lrrc20', 'Pcyox1l', 'Dhx57', 'Aen', 'Fam64a', 'Rnf2', 'Mdga1', 'Txndc16', 'Nav2', 'Ier5l', 'Hoxb8', 'Hsd17b12', 'Tle2', 'Lcmt1', 'Pip4k2b', 'Mgmt', 'Pbx1', 'Shb', '1110059E…	46	5
Sox2	['Aldoa', 'Rbpms2', 'G3bp2', 'Tcea3', 'Cecr2', 'Sox2', 'Phlda2', 'Mtf2', 'Snapc3', 'Rhebl1', 'Psat1', 'Vangl1', 'Stmn2', 'Ckb', 'Pipox', 'Hk2', 'Mycn', 'Etv4', 'Pou2f1', 'Rest', 'Klf3', 'Zfp64', 'Utp20', 'Jarid2', 'Mras', 'Lefty1', 'Phc1', 'Prps1', 'Mov10', 'Psmd13', 'Zfp532', 'Zfp296', 'Zmynd8', 'Smarcad1', 'Kdm5b', 'Tubb2b', 'Rnf44', 'Sars']	38	5
Atf7	['Lrrc8a', 'Ralgapa1', 'D3Ertd751e', 'Golga1', 'Slc10a3', 'Nans', 'Pmepa1', 'Ptprk', 'Scfd2', 'Tmem57', 'Ormdl3', 'Arnt', 'Gigyf2', 'Tmem120b', 'Med27', 'Scyl2', 'Fhdc1', 'Qser1']	18	5
Pknox1	['Ap3m2', 'Lpin2', 'Dolpp1', 'Rsbn1l', 'Barx2', 'Zfp516', 'Ubap2l', 'Hist1h3g', 'Cnnm2', 'Map3k3', 'Mex3b', 'Mars2', 'Vgll4', 'Pknox1', 'Plce1']	15	5
Foxo3	['Foxo3', 'Bckdk', 'Lcor', 'Fancl', 'Tlr7', 'Plekhm3', 'Pdik1l', 'Kpna3', 'Pdia4', 'Speg', 'Zdhhc8']	11	5
Snai3	['Pou3f1', 'Slc16a3', 'Rbm38', 'Wnt6', 'Bex1', 'Sfn', 'Rpl34-ps1', 'Gjb3']	8	5
Foxk1	['Rxrb', 'Nhsl1', 'Tnip2', 'Ahdc1', 'B4galt7', '9130008F23Rik']	6	5
Arntl	-	-	-
Barx2	-	-	-
Brf1	-	-	-
Clock	-	-	-
Creb1	-	-	-
Etv5	-	-	-
Fhl2	-	-	-
Foxj2	-	-	-
Gtf2i	-	-	-
Hdac1	-	-	-
Hmga1	-	-	-
Hmgb2	-	-	-
Jdp2	-	-	-
Klf10	-	-	-
Klf4	-	-	-
Klf7	-	-	-
Klf9	-	-	-
Lhx2	-	-	-
Meis2	-	-	-
Meox1	-	-	-
Mnt	-	-	-
Mxd1	-	-	-
Nfkb1	-	-	-
Nr1d1	-	-	-
Nr1h2	-	-	-
Nr2f1	-	-	-
Nr6a1	-	-	-
Pitx1	-	-	-
Plagl1	-	-	-
Pou2f1	-	-	-
Prrx2	-	-	-
Pura	-	-	-
Rb1	-	-	-
Rfx1	-	-	-
Rfxank	-	-	-
Rora	-	-	-
Runx2	-	-	-
Six1	-	-	-
Sp100	-	-	-
Tcf3	-	-	-
Tfcp2	-	-	-
Twist2	-	-	-
Vezf1	-	-	-
Zbtb33	-	-	-
Zbtb7b	-	-	-
Zfp668	-	-	-
Elf5	['Tnpo3', 'Appl2', 'Bin3', 'Epn1', 'Fbxo28', 'Arfip1', 'Mettl6', 'Dnajb9', 'Eaf1', 'Gabpa', 'Csnk1g1', 'Trip4', 'Pyroxd1', 'Paip2', 'Cdk13', 'Lypla2', 'Fibp', 'Cd2bp2', 'Ap1m1', 'Arih2', 'Tbc1d22a', 'Tssc4', 'Dhx36', 'Vps52', 'Gga1', 'Bcl2l1', 'Pik3r4', 'Fam188a', 'Zranb2', 'Syvn1', 'Cbll1', 'Zcchc6', 'Rnf167', 'Ccz1', 'Nprl2', 'Cyb561d2', 'Rer1', 'Slc25a46', 'Gnai3', 'Fam96a', 'Mtmr4', 'Slc39a13…	3260	NA
Etv4	['Eif3g', 'Urm1', 'Vmp1', 'Tomm70a', 'Dmap1', 'Cap1', 'Ercc3', 'Lsm1', 'Nudt5', 'Ppid', 'Psmd6', 'Ppp1r16a', 'Fbxo28', 'Sco1', 'Actr6', 'Eif3l', 'Srbd1', 'Fam96b', 'Brf2', 'Chchd5', 'Gabarapl2', 'Rpf2', 'Prkcsh', 'Utp14a', 'Tmem101', 'Txn2', 'Nol6', 'Rsl24d1', 'Eif4e2', 'Ddx21', 'Timm23', 'Psmb7', 'Serpinb6a', 'Tomm20', 'Eif3m', 'Hspa4', 'Wdr45', 'Ngrn', 'Smug1', 'Cops7a', 'Mrpl3', 'Snrpe', 'Itpa…	1008	NA
Creb3l4	['Rfx1', 'Rnf44', 'Cdc14b', 'Nudt18', 'Nup98', 'Tcf20', '1700084E18Rik', 'Atxn1l', 'Tiprl', 'Josd1', 'Rad23a', 'Ap2b1', 'Btg1', 'Pdp1', 'Map1lc3a', 'Gpbp1', 'Letm2', 'Dhx36', 'Nup133', 'Rnf166', 'Mycbpap', 'Mmgt1', 'Lekr1', 'Rps29', 'Akirin1', 'Cds1', 'Lsm12', 'Nek1', 'Xpnpep3', 'St13', 'Suv39h2', 'Btbd9', 'Ldha', 'D430042O09Rik', 'Arih1', 'Trp53inp2', 'Dtl', 'Zdbf2', 'Senp2', 'Ddx49', 'Areg', 'C…	969	NA
Rfx2	['Csnk1g1', 'Trip4', 'Kif3b', 'Mapre3', 'Ptpn4', 'Traf3ip1', 'Cyth2', 'Wdr31', 'Sec14l1', 'Lrrc56', 'Mxd4', 'Cep120', 'Ppm1g', 'Cdc14a', 'Gtf2f1', 'Pask', 'Arl4a', 'Chn1', 'Ift81', 'Ncoa5', 'Cep164', 'Dnaic1', 'Ak1', 'Tsga10', 'Dyrk3', 'Prdm4', 'Fkbpl', '1110051M20Rik', 'Med9', 'Ip6k1', 'Tctn3', 'Pcsk4', 'Ssx2ip', 'Tmem67', 'Tnpo1', 'Pick1', 'Tasp1', 'Rnf139', '9530077C05Rik', 'Rpgrip1l', 'Slc25a…	568	NA
Ybx1	['Tomm40', 'H3f3b', 'Hsp90b1', 'Camta1', 'Hspa5', 'Rnf181', 'Cdca2', 'Pin1', 'Cks1b', 'Katnb1', 'Pgp', 'Atp5g1', 'Ift140', 'Fdft1', 'Hmgb2', 'Fam46b', 'Spsb3', 'Hook1', 'Cdc6', 'Hist1h3c', 'Wdr62', 'Vcp', 'Cdkn3', 'Ccnb2', 'Ube2c', 'Top2a', 'Fdps', 'Recql', 'Slc2a8', 'Rpa2', 'Sox4', 'Etf1', 'Snrpa', 'Ppp1r7', 'Manf', 'Cdc23', 'Mcm3', 'Aimp2', 'Rpain', 'H2afx', 'Calr', 'Armc1', 'Hmgb1', 'Wbp1', 'P…	540	NA
Runx1	['Pik3cg', 'Chd2', 'Mpo', 'Appl2', 'Lcp2', 'Ss18', 'Gpsm3', 'Arhgap31', 'Spn', 'Zfp668', 'Bcl2a1a', 'Bcl2a1d', 'Itga2b', 'Stat5a', 'Fmnl1', '6530402F18Rik', 'Tjp2', 'Cd68', 'Klhl6', 'Ipo7', 'Rac1', 'Vav1', 'Itgal', 'Dnm3os', 'Hcls1', 'Shc1', 'Cd14', 'Pstpip1', 'Usp38', 'Samsn1', 'Spns3', 'Arhgap27', 'Nedd9', 'Klhl20', 'Sh3bgrl', 'Arhgap30', 'Baz1a', 'Sh3bp2', 'Zfp710', 'Nckap1l', 'Polr2a', 'Arhga…	517	NA
Tead1	['Wwc2', 'Col12a1', 'Cyr61', 'Ctgf', 'Amotl2', 'Sgk1', 'Tiam2', 'Zswim4', 'Nfe2l1', 'Ppfibp1', 'Osmr', 'Lrp6', 'Zfp185', 'Tpbg', 'Islr', 'Ccl17', 'Bcl9l', 'Chrnb1', 'Dlc1', 'Ptpn21', 'Phactr2', 'Fry', 'Ptrf', 'Nab2', 'Rai14', 'Amotl1', 'Dusp6', 'Tnks1bp1', 'Ctf1', 'Fndc3b', 'Matn4', 'Slc12a4', 'Egfl8', 'Trip6', 'Yap1', 'Thbs1', 'Lox', 'Ager', 'Irs1', 'Ctdsp2', 'Nnt', 'Tro', 'Rhbdf1', 'Nfat5', 'Ar…	417	NA
Nfatc1	['Rcan1', 'Il11', 'Cytl1', 'Nr4a2', 'Sdk2', 'Nfatc1', 'Nfatc2', 'C1qtnf3', 'Col12a1', 'Nedd9', 'Pcolce2', 'Col11a2', 'Nrk', 'Itga5', 'Myo1e', 'Tiam2', 'Nog', 'Atp10a', 'Fibin', 'Crispld1', 'Tpbg', 'Capn6', 'Arid4b', 'Ets1', 'Chst11', 'St3gal6', 'Mdfi', 'Zbtb2', 'Kif21a', 'Ctgf', 'Ust', 'Ythdc1', 'Ubtf', 'Hivep2', 'Islr', 'Batf', 'Nab1', 'Fry', 'Col8a2', 'Loxl3', 'Phtf2', 'Plec', 'Rara', 'Emp3', '…	400	NA
Tcf4	['Prrx1', 'Svep1', 'Helz', 'Foxp1', 'Plp1', 'Fermt2', 'Tnrc18', 'Dkk2', 'Tmem150a', 'Epas1', 'Zfp36l1', 'Ldb1', 'Spry4', 'Amotl2', 'Phip', 'Itga6', 'Id4', 'Meis2', 'Neurl1b', 'Lims2', 'Pkdcc', 'Egr1', 'Igfbp4', 'Cadm1', 'Ccnyl1', 'Mat2a', 'Glg1', 'Ccdc80', 'Id3', 'Klf7', 'Ntf3', 'Olfm1', 'Prelp', 'Bin1', 'Sh2b3', 'Ppp3ca', 'Scara3', 'Map4k4', 'Mlxip', 'Nkd1', 'Dlgap4', 'Cdk14', 'Nrarp', 'Smarcd3'…	340	NA
Prdm1	['Rtp4', 'Usp18', 'Otud4', 'Rsad2', 'Rspo3', 'Pan3', 'Itpkb', 'Oasl1', 'Cybb', 'Cxcl10', 'Isg15', 'Bcl2a1b', 'Vgll4', 'Nedd9', 'Zfand5', 'Smarcd3', 'Dnajc14', 'Enpp1', 'Bst2', 'Fam102b', 'Parp14', 'Cnksr3', 'Ppp1r16b', 'Pou2f1', 'Fcgr4', 'Gna13', 'Cd274', 'Ctnnd1', 'Ccl5', 'Uba7', 'Gnaq', 'Cd68', 'H2-K1', 'Hif1a', 'Xaf1', 'E2f3', 'Inppl1', 'Tcf4', 'Gzma', 'Ifit1', 'Clec14a', 'Ushbp1', 'Wnt5a', 'C…	324	NA
Tcf7l1	['Svep1', 'Trim8', 'Helz', 'Epas1', 'Fst', 'Spry4', 'Cadm1', 'Fermt2', 'Armcx3', 'Ccdc80', 'Glg1', 'Nrarp', 'Id3', 'Lims2', 'Nrp2', 'Igfbp4', 'Tmem150a', 'Amotl2', 'Il11ra1', 'Fn1', 'Tmem55a', 'Tpm1', 'Csrp2', 'Zfp503', 'Fbn1', 'Ntf3', 'Scara3', 'Pkdcc', 'Emcn', 'Ctnna1', 'Dusp6', 'Zfp367', 'Map4k4', 'Tsc22d1', 'Egr1', 'Arrdc3', 'Bcl3', 'Gnaq', 'Rspo3', 'Nfib', 'Bhlhe41', 'Sspn', 'Slco2a1', 'Igfb…	263	NA
Hif1a	['Gigyf2', 'Zzz3', 'Bhlhe40', 'Ptprs', 'Gla', 'Hnrnph2', 'Neurl2', 'Snx2', 'Rnf145', 'Kdm4c', 'Rpusd4', 'Tgfb2', 'Mcoln1', 'Nab2', 'Khdrbs1', 'Snx8', 'Kdm6a', 'Ddx3x', 'Nptn', 'Fbxo33', 'Tnpo2', 'Morc2a', 'Atxn2', 'Slc20a1', 'Eif4g1', 'Cry1', 'Bhlhe41', 'Ccdc6', 'Cbx8', 'Cd164', 'Brox', 'Ssr1', 'Gns', 'Crispld1', 'Eml4', 'Stt3a', 'Spty2d1', 'Fubp3', 'Vapa', 'Trpm7', 'Wsb1', 'Uso1', 'Stx6', 'Ankrd…	238	NA
Atf2	['Dctn4', 'Homer2', 'Rfx1', 'Relb', 'Kdm2b', 'Dpm1', 'Ubap2l', 'Fam134a', 'Ccl27a', 'Nup98', 'Tpp2', 'Tmem59l', 'Gtf3c1', 'Ythdc1', 'Anapc10', 'Slc25a36', 'Tmem183a', 'Ift81', 'Mbtd1', 'Utp18', 'Dnajb11', 'Rnf44', 'Adnp2', 'Dnttip1', 'Dact1', 'Supv3l1', 'Aptx', 'Ppm1a', 'Rfx3', 'D17Wsu92e', 'Ubr5', 'Casc3', 'Dhx36', 'Appbp2', 'Cdc14b', '1810013L24Rik', 'Hspa4', 'Ap2b1', 'Gpbp1', 'Ift57', 'Ddx42',…	194	NA
Bptf	['Itpkb', 'Gigyf1', 'Rere', 'Zfhx3', 'Rbms3', 'Clip1', 'Ppp1r9a', 'Ubtf', 'Gse1', 'Gatad2a', 'Slc44a2', 'Ebf1', 'N4bp2', 'Runx2', 'Tshz3', 'Elk3', 'Tnrc18', 'Fbxo42', 'Zfp503', 'Mga', 'Brd4', 'Chd7', 'Arid1a', 'Gtf3c2', 'Zbtb46', 'Nfix', 'Hoxa10', 'AI846148', 'Fbxl20', 'Smarca2', 'Klf7', 'Qrich1', 'Nfat5', 'Taok1', 'Spen', 'Hipk3', 'Pitpnc1', 'Foxp1', 'St3gal2', 'Maml3', 'Tle4', 'Hmgb1', 'Cxxc5',…	187	NA
Etv1	['Efnb3', 'Agpat4', 'Plp1', 'Sept4', 'Atp1a2', 'Gpm6b', 'Il33', 'Syt11', 'Enpp2', 'Chst1', 'Pdlim2', 'Adamts4', 'C2cd2l', 'Elmo1', 'Ppp1r16b', 'Tsc22d4', 'Sv2a', 'Ppp1r9b', 'Rapgef4', 'Prex1', 'Agap3', 'Scamp5', 'Frmd4a', 'Rassf2', 'Cntfr', 'Prickle2', 'Pea15a', 'Srgap3', 'Apln', 'Ppip5k1', 'Pabpn1', 'Srcin1', 'Arhgef2', 'Dnmt3a', 'Afap1l2', 'Slc6a9', 'Zfp462', 'Phldb1', 'Dusp7', 'Myo18a', 'Igsf8…	160	NA
Cnot3	['Fbxl3', 'Zhx2', 'Tnrc6a', 'Trerf1', 'Nemf', 'Kdm3a', 'Hist1h1b', 'Brd3', 'Actb', 'Dnajc21', 'Top1', 'Pum2', 'Rbpms2', 'Foxp1', 'Sart3', 'Shroom3', 'Plekhh3', 'Phf12', 'Runx1t1', 'Pitx2', 'Med14', 'Dffb', 'Usp34', 'Sox2', 'Wtap', 'Hnrnpu', 'Nmt1', 'Kdm2b', 'Lmo4', 'Cecr2', 'Smarcd3', 'Ino80d', 'Tcerg1', 'Nipbl', 'Ss18', 'Hist1h1d', 'Sox4', 'Ppil4', 'Tmem43', 'Ppp2r5c', 'Hist3h2ba', 'Six1', 'Pitp…	156	NA
Sox9	['Col9a1', 'Cytl1', 'Prelp', 'Col9a3', 'Hapln1', 'Omd', 'Mgp', 'Cd109', 'Cyp26b1', 'Mtss1l', 'Amotl2', 'Lama4', 'Fgfr3', 'Chst1', 'Rarg', 'Nedd9', 'Tbx15', 'Boc', 'Fkbp1b', 'Fgfrl1', '4930523C07Rik', 'Auts2', 'Sned1', 'Actn4', 'Pde4b', 'S100b', 'Mpzl2', 'Chad', 'Slc16a2', 'Loxl2', 'Srf', 'Atxn7l1', 'Gli2', 'Col11a2', 'Exoc2', 'Dnm3os', 'Flnc', 'Phldb1', 'Mest', 'Ecm2', 'Ccdc88a', 'Klhl21', 'Mcoln…	117	NA
Ovol2	['Ap1m1', 'Smoc1', 'Uggt2', 'Katnal1', 'Hdgfrp2', 'Ovol2', 'Hspa2', 'Ube2s', 'Phf7', 'Dcaf7', 'Usp1', 'Crybg3', 'Ccl27a', 'Bbx', 'Btbd10', 'Zranb3', 'Arl3', 'Ppm1g', 'Socs7', 'Ccnk', 'Mtx1', 'Ints6', 'Samd4', 'Diablo', 'Traf3ip1', 'Tbpl1', 'Rfx2', 'Nasp', 'Egln2', 'Mapkbp1', 'Brms1', 'Cep57', 'Pde4dip', 'Thnsl1', 'Enkur', 'Pask', 'Map3k7', 'Atf2', 'Pick1', 'Cstf1', 'Pcsk4', 'Ribc1', 'Tbcc', 'Gmfb…	116	NA
Msx2	['Prrx1', 'Llgl2', 'Kctd1', 'Sspn', 'Lasp1', 'Hmga1', 'Actg1', 'Bambi', 'Msx2', 'Rbpms2', 'Amotl2', 'Nrarp', 'Rnf2', 'Lmo1', 'Nr4a1', 'Ntf3', 'Msx1', 'Col27a1', 'Gprc5c', 'Ehd4', 'Morc4', 'Phf19', 'Smad6', 'Sdc1', 'Bmp7', 'Klhl21', 'Marcksl1', 'Plcd1', 'Ube2f', 'Sox9', 'Eomes', 'Srf', 'Cast', 'Dusp6', 'Hivep2', 'Ctnnb1', 'Mbtd1', 'Ncam1', 'Ccdc3', 'Sfn', 'Aqp3', 'Ank', 'Kctd15', 'Hbegf', 'Denr', …	97	NA
Thra	['Atp1a2', 'Arhgap23', 'Dnm1', 'Sox10', 'Thra', 'Gnao1', 'Vamp2', 'Zfp462', 'Srcin1', 'Eml2', 'Tsc22d1', 'Adamtsl4', 'Cntfr', 'Spock2', 'Dact3', 'Sv2a', 'Pcgf2', 'Nfix', 'Igfbp4', 'Celsr2', 'Ccnd2', 'Stx1a', 'Mfap2', 'Foxp2', 'Csdc2', 'Cnp', 'Mcam', 'Sox4', 'Ddr1', 'Efnb1', 'Zfp521', 'Dusp8', 'Thtpa', 'Fam171a2', 'Auts2', 'Col8a2', 'Chst1', 'Zfp827', 'Lzts2', 'Nlgn2', 'Cryab', 'Ric8b', 'Nfia', 'C…	97	NA
Hoxb8	['Hoxb7', 'Hoxb8', 'Aqp3', 'Dkk2', 'Fxyd2', 'Hoxb6', 'Sox11', 'Hoxa7', 'Hoxc10', 'Runx1t1', 'Tubb3', 'Hdgfrp3', 'Hoxb2', 'Hoxb4', 'Mecom', 'Kctd1', 'Prrx1', 'Hoxa9', 'Sall2', 'Meis1', 'Reep1', 'Actb', 'Lmo1', 'Hoxc6', 'Igf2bp3', 'Pknox2', 'Kctd15', 'Laptm4b', 'Ctbp2', 'Slc22a17', 'H2afy2', 'Ncam1', 'Chd3', 'Gsk3b', 'Flrt2', 'Hoxc9', 'Cdk5r1', 'Igfbp5', 'Fam109a', 'Zfp503', 'Trp53i11', 'Cntfr', 'H…	75	NA
Hivep1	['Zc3h12a', 'Gdpd5', 'Cd69', 'Gatad2a', 'N4bp1', 'Stard8', 'Tank', 'Tifa', 'Mtmr4', 'Nedd4l', 'Zbtb46', 'Rftn1', 'Pld1', 'Etl4', 'Gse1', 'Pld2', 'Fbxo10', 'Parp11', 'Ptpn21', 'Msl3l2', 'Fry', 'Mcoln2', 'Ctbs', 'Auts2', 'Osbpl3', 'Rnf6', 'Relb', 'Mylk', 'Chdh', 'Adcy7', 'Rassf4', 'Hivep2', 'Ctdsp1', 'Smg7', 'Pdlim5', 'Sox13', 'Thtpa', 'Cask', 'Lama4', 'Ppfibp2', 'Ncoa2', 'Myo18a', 'Ezh1', 'Stc1', …	61	NA
Hivep2	['Appl1', 'Relb', 'Fchsd2', 'R3hdm2', 'Ankhd1', 'Ctgf', 'Trio', 'Rc3h2', 'Nr4a2', 'Col11a2', 'Setd5', 'Ube2h', 'Ubr5', 'Itga5', 'Sesn2', 'Cdk17', 'Hivep2', 'Osmr', 'Gnb1', 'Rrad', 'Plec', 'Fry', 'Acan', 'Ccnl1', 'Ddx17', 'Jak2', 'Wac', 'Zbtb1', 'Fam83g', 'Plekha3', 'Chic2', 'Brd2', 'Clic4', 'Il6st', 'Rara', 'Ets1', 'Moxd1', 'Xist', 'Arl6ip5', 'Kdm6b', 'Slc5a3', 'Epc1', 'Dirc2', 'Gjc1', 'Ebf1', 'E…	60	NA
Nfix	['Slc6a9', 'Osbpl7', 'Il33', 'Arhgap23', 'Ptgds', 'Tef', 'Gnai1', 'Apln', 'Fam168a', 'Fbxo10', 'Adamts4', 'Sh3d19', 'Tmod2', 'Bmf', 'Arid5b', 'Plp1', 'Sept4', 'Akap9', 'Tmem125', 'Npc1', 'Tmod1', 'Nfia', 'Ncald', 'Slc25a27', 'Slc38a3', 'Nfix', 'Ppm1k', 'Ptgfrn', 'Syt7', 'Il1rap', 'Stam', 'Pcyt1b', 'Ntrk2', 'Creb5', 'Prnp', 'Zfhx3', 'Abl1', 'Fndc1', 'Nfib', 'Dclk1', 'Etv1', 'Tcf4', 'Slc1a3', 'Mal'…	46	NA
Hoxa10	['Dkk2', 'Mdk', 'Bmp7', 'Hoxc10', 'Hoxa10', 'Mex3b', 'Osr2', 'Hsd11b2', 'Zfp503', 'Aldh1a2', 'Kcnk2', 'Tmem119', 'Lbh', 'Tbx3', 'Ephb2', 'Hoxa9', 'Ngfr', 'Sox4', 'Nr2f2', 'Nbl1', 'Cxcl14', 'Fbxo32', 'Pknox2', 'Il17rd', 'Hoxb8', 'Hoxc6', 'Wnt5a', 'Myh11', 'Tmem150a', 'Rgma', 'Lrig3', 'Hoxc9', 'Hoxb7', 'Myh10', 'Cgnl1', 'Sh3pxd2b', 'Rgs16', 'Afap1l2', 'Dchs1', 'Rhobtb1', 'Tnfrsf21', 'Ano1', 'Tle1',…	45	NA
Arnt	['Gigyf2', 'Ube2h', 'Faf1', 'Cln3', 'Rab21', 'Brox', 'Ddx42', 'Klf11', 'Nptn', 'Fnip1', 'Prr11', 'Ipo7', 'Lox', 'Orc4', 'Taf4b', 'Nup98', 'Tgfb3', 'Phc2', 'Stx5a', '6430548M08Rik', 'Klhl24', 'Phc3', 'Hexim1', 'Rnf44', 'Cc2d1b', 'Ccar1', 'Slc10a3', 'Eif2ak3', 'Josd1', 'Lats2', 'Abcd1', 'Kidins220', 'Zbtb42', 'Sfrp2', 'Arhgef40', 'Snx33', 'Nlk', 'P2ry14', 'Il1rap', 'Gtpbp1', 'Zcchc2', 'Med27']	42	NA
Meis1	['Hoxb5', 'Hoxa5', 'Ednrb', 'Hand2', 'Vat1', 'Pitx2', 'S1pr2', 'Rspo3', 'Meis1', 'Tcf21', 'Fam174b', 'Pcdh18', 'Pitx1', 'Angpt1', 'Hic1', 'Meis2', 'Hoxb4', 'Runx1t1', 'Gpc3', 'Wnt5a', 'Emid1', 'Sema3a', 'Tnfrsf19', 'Ptn', 'Tshz2', 'Arhgap28', 'Kcnk2', 'Samd5', 'Nr2f2', 'Laptm4b', 'Epha7', 'Map2k5', 'Qsox2', 'Pbx1', 'Plekha6', 'Gata2', 'Cxcl12', 'St6galnac3', 'Rbp1', 'Slc9a5']	40	NA
Zbtb17	['Nf1', 'Ncoa2', 'Slc25a23', 'Nbea', 'Pgm5', 'Dlg3', 'Lrp12', 'Fgfbp3', 'Dcaf5', 'Camk2n2', 'Myo1g', 'Gata3', 'Tarsl2', 'Sec16a', 'Arhgap26', 'Larp1', 'Eml4', 'Iqcd', 'Mbd5', 'Rngtt', 'Lin52', 'Rfxank', 'Sertad1', 'Ncor2', 'Zfhx2', 'Paip2b', 'Kpna3', 'Pde4a', 'Mecp2', 'Strada', 'Daam1', 'Efemp2', 'Pak3', 'Dnajb5', 'Fance', 'Ar', 'R3hcc1', 'Gpr141']	38	NA
Sox5	['Mapk6', 'Tmem218', 'Tnrc18', 'Hdac9', 'Srgap1', 'Ift57', 'Osbp', 'Rdx', 'Mxra8', 'Mtdh', 'Cebpg', 'Cry1', 'Eif1', 'Penk', 'Cxxc5', 'Zfp644', 'Tmsb15b1', 'Wdr35', 'Arl13b', 'Ppp3ca', 'Tmem144', 'Ddit3', 'Sertad2', '1110020A21Rik', 'Tnpo1', 'Eif5', 'Samd4b', 'Tmem91', 'Tor1aip1', 'Hax1', 'Ing1']	31	NA
Twist1	['Pkdcc', 'Numbl', 'Cox4i2', 'Nrp2', 'Ptk7', 'Srpx2', 'Ndufa4l2', 'Sparc', 'Pdgfra', 'Rcor2', 'Prrx1', 'Hoxc6', 'Wif1', 'Ptprd', 'Mrc2', 'Alpl', 'Galnt1', 'Steap3', 'Crispld1', 'Fap', 'Reck', 'Col1a1', 'Serf2', 'Ostc', 'Col5a1', 'Cadm1', 'Col11a2', 'Creb3l1', 'Ptgis', 'Crabp1']	30	NA
Foxq1	['Klf5', 'Sema4b', 'Bmp7', 'Vill', 'Rnf144b', 'Nrarp', 'Bmp3', '2610528J11Rik', 'Dstn', 'Dsp', 'Smagp', 'Fam63a', 'Dhrs3', 'Mllt3', 'Mecom', 'Tst', 'Sh2d4a', 'Arhgap12', '0610040J01Rik', 'Perp', 'Tspan8', 'Il18', 'Tesc', 'Slc14a1', 'Sytl2', 'Krt7']	26	NA
Gli3	['Pgf', 'Vcan', 'Peg3', 'Fgf2', 'Pkdcc', 'Nlrp3', 'Loxl2', 'Zfp362', 'Ptn', 'Slit3', 'Col8a2', 'Qser1', 'Capn6', 'Gli3', 'Lrrc17', 'Tgfb2', 'Fam198b', 'Boc', 'Gpr153', 'Fgfr1', 'Ski', 'Dlk1', 'Zfyve9', 'Ddr2', 'Arhgap24']	25	NA
Pou3f1	['Pbx3', 'Smug1', 'Btbd11', 'Specc1', 'Peg10', 'Srcin1', 'Tmeff1', 'Zfp609', 'Cbfa2t2', 'Neurl1a', 'Ppm1l', 'Napg', 'Ddc', 'Ank2', 'Hic2', 'Carns1', 'Vps8', 'Slc6a9', 'Ints4', 'Clasp2', 'Pou3f1']	21	NA
Foxp4	['Ddi2', 'Rin2', 'AI661453', 'Mtr', 'Lhpp', 'Sox13', 'Foxp4', 'Harbi1', 'Baiap2l1', 'Gtf3c5', 'Mmp15', 'Zfp27', 'Lsm14a', 'Mettl3', 'Pdss2', 'St6galnac6', 'Nup160', 'Fam35a']	18	NA
Gtf2ird1	['Gtf2ird1', 'Wipf2', 'Sin3a', 'Rpgrip1', 'Tbc1d5', 'Msh5', 'Cdc7', 'Sorbs1', 'Lrig2', 'Papd4', 'Pwwp2a', 'Zw10', 'Tuft1', 'Hmg20b', 'Ankhd1', 'Xpo4', 'Sympk', 'Kif3b']	18	NA
Tbx3	['Pdlim2', 'Slco2a1', 'Aldh1a1', 'Aldh1a7', 'Krt19', 'Clcn2', 'Wfdc2', 'Vwf', 'Nr2f2', 'Tbx2', 'Itga3', 'Rab11fip1', 'Pcdh1', 'Grem2', 'Tspan13', 'Hoxa10', 'Myof', 'Tmem100']	18	NA
Vdr	['Fxyd2', 'Baiap2l2', 'Mttp', 'Elf3', 'Anpep', 'Pigr', 'Ttc36', 'Ckmt1', 'Fbp2', 'Espn', 'Fabp1', 'Apoa1', 'Gpx2', 'Maoa', 'Cda', 'Retsat', 'Bdh1', 'Ppp1r1b']	18	NA
Klf13	['Klra2', 'Akap13', 'Klf3', 'Stag2', 'Rassf2', 'Osbpl8', 'Msn', 'Wnk1', 'Klf13', 'Hpcal1', 'Rap1b', 'Pak2', 'Prex1']	13	NA
Mecom	['Atp1b1', 'Scnn1a', 'Aldh1a7', 'Itga3', 'Hist1h1d', 'Vsig2', 'AA986860', 'Lmo7', 'Dram1', 'Gprc5a']	10	NA
Sall2	['Gap43', 'Mex3a', 'Tuba1a', 'Sox11', '2610203C20Rik', 'Tubb2b', 'Zc4h2', 'Tmem132a', 'Samd14', 'Hmgn3']	10	NA
Hand2	['Klhdc8b', 'Tnnt2', 'Art4', 'Ltbp4', 'Myl7', 'Eln', 'Des', 'Bmp4', 'Rgs5']	9	NA
Nfe2l1	['Tead1', 'Per2', '4632427E13Rik', 'Rprd1a', 'Uso1', 'Dnajc1', 'Sec16a', 'Nr2f6']	8	NA
Sox6	['Mapk6', 'Sox6', 'Kif21a', 'Cxxc5', 'Fdft1', 'Sgms2', '1600020E01Rik', 'Arl4a']	8	NA
Zfpm1	['Car2', 'Arhgap32', 'BC030867', 'Car1', 'Slc14a1', 'Styx', 'Ficd', 'Zfp148']	8	NA
Hoxb4	['Mlec', 'Bhlhe41', 'Baz1b', 'Pcsk5', 'Tk2', 'Rtn4rl1', 'Angpt1']	7	NA
Pbx1	['Pamr1', 'Zfp503', 'Tcf21', 'Tbx3', 'Antxr1', 'Prss23', 'Pbx1']	7	NA
Ahr	['Prex2', 'Arrb1', 'Rbak', 'Notch4', 'Trerf1', 'Atf6']	6	NA
Erf	['Nf1', '8430429K09Rik', 'Spink10', 'Fbxo38', 'Zfp697', 'Fbxl8']	6	NA
Rbpj	['Rpgrip1l', 'Ophn1', 'Prkab2', 'Fastkd5', 'Slamf9', 'Etv3']	6	NA
Stat4	['Bin3', 'Nkg7', 'Cbl', 'Itsn2', 'Tmsb10', 'Baz1a']	6	NA
Ar	['Zbtb20', 'Ar', 'Col5a3', 'Serping1', 'Fam198b']	5	NA
Cux1	['Clasp1', 'Vav3', 'Gnb2', 'Trim41', 'Papolg']	5	NA
Hmgb1	['Hmgb3', 'Ank1', 'Hmgb1', 'Ccnd2', 'Cdc25b']	5	NA
Mlx	['H13', 'Mlx', 'Mall', 'Hectd3', 'Cmc1']	5	NA
Bach2	['D930015E06Rik', 'Bach2', 'Gpr183', 'Foxp1']	4	NA
Foxm1	['Prr11', 'Tacc3', 'Ttk', 'Ska1']	4	NA
Nfatc3	['Dusp8', 'Btbd7', 'Polr3b', 'E2f3']	4	NA
Max	['Hnrnph2', 'Arpc5', 'Capn7']	3	NA
Rfxap	['Dnajc16', 'Ncoa5']	2	NA
