# Supplementary material for: Predicting gene regulatory networks from cell atlases
Source: Life Sci Alliance. 2020 Sep 21;3(11):e202000658. doi: 10.26508/lsa.202000658 (PMC7536823; doi:10.26508/lsa.202000658)
Supplement: Supplementary file 6 [file LSA-2020-00658_TableS5.xlsx]

## Sheet: STRINGLinks
Protein1	Protein2	STRINGCombinedScore	InRegulonNetwork (CSI > 0.7)	ScoreQuantile
Hoxa7	Egr2	150	FALSE	(149.999, 183.0]
Hsf1	Irf7	150	FALSE	(149.999, 183.0]
Grhl1	Yy1	150	FALSE	(149.999, 183.0]
Spib	Trp53	150	FALSE	(149.999, 183.0]
Atf7	Nfat5	150	FALSE	(149.999, 183.0]
Nfat5	Atf7	150	FALSE	(149.999, 183.0]
Fli1	Cebpa	150	FALSE	(149.999, 183.0]
Nfia	Klf5	150	FALSE	(149.999, 183.0]
Lef1	Setdb1	150	FALSE	(149.999, 183.0]
Nr3c1	Rxrb	150	FALSE	(149.999, 183.0]
Tfe3	Spib	150	FALSE	(149.999, 183.0]
Elf4	E2f2	150	TRUE	(149.999, 183.0]
Ikzf1	Mef2a	150	FALSE	(149.999, 183.0]
Gli2	Nr3c1	150	FALSE	(149.999, 183.0]
Foxp2	Nr3c1	150	FALSE	(149.999, 183.0]
Yy1	Grhl1	150	FALSE	(149.999, 183.0]
Spib	Tfe3	150	FALSE	(149.999, 183.0]
Klf5	Pknox1	150	FALSE	(149.999, 183.0]
Mef2a	Kdm5a	150	FALSE	(149.999, 183.0]
Klf5	Klf1	150	FALSE	(149.999, 183.0]
Tead4	Msx1	150	TRUE	(149.999, 183.0]
Klf5	Nfia	150	FALSE	(149.999, 183.0]
Nr3c1	Gli2	150	FALSE	(149.999, 183.0]
Nr3c1	Foxp2	150	FALSE	(149.999, 183.0]
Msx1	Hcfc1	150	FALSE	(149.999, 183.0]
Egr2	Hoxa7	150	FALSE	(149.999, 183.0]
Trp53	Spib	150	FALSE	(149.999, 183.0]
Klf5	Mef2d	150	FALSE	(149.999, 183.0]
Msx1	Tead4	150	TRUE	(149.999, 183.0]
Irf7	Hsf1	150	FALSE	(149.999, 183.0]
Hoxc10	Gli1	150	TRUE	(149.999, 183.0]
Pparg	Gtf2b	150	FALSE	(149.999, 183.0]
Pknox1	Klf5	150	FALSE	(149.999, 183.0]
Klf1	Klf5	150	FALSE	(149.999, 183.0]
Foxp1	Irf1	150	FALSE	(149.999, 183.0]
Gli1	Hoxc10	150	TRUE	(149.999, 183.0]
E2f2	Elf4	150	TRUE	(149.999, 183.0]
Mef2d	Klf5	150	FALSE	(149.999, 183.0]
Nr2c2	Jun	150	FALSE	(149.999, 183.0]
Gmeb2	Cebpb	150	FALSE	(149.999, 183.0]
Hcfc1	Msx1	150	FALSE	(149.999, 183.0]
Cebpa	Fli1	150	FALSE	(149.999, 183.0]
E2f6	Ddit3	150	FALSE	(149.999, 183.0]
Ddit3	E2f6	150	FALSE	(149.999, 183.0]
Cebpb	Gmeb2	150	FALSE	(149.999, 183.0]
Hoxa5	Ikzf1	150	FALSE	(149.999, 183.0]
Tcf7	Sp3	150	TRUE	(149.999, 183.0]
Fosb	Usf1	150	FALSE	(149.999, 183.0]
Gtf2b	Pparg	150	FALSE	(149.999, 183.0]
Setdb1	Lef1	150	FALSE	(149.999, 183.0]
Tcf7l2	Usf1	150	FALSE	(149.999, 183.0]
Stat1	Pou2af1	150	TRUE	(149.999, 183.0]
Pou2af1	Stat1	150	TRUE	(149.999, 183.0]
Usf1	Tcf7l2	150	FALSE	(149.999, 183.0]
Nfkb2	E2f6	150	FALSE	(149.999, 183.0]
Rara	Esrra	150	FALSE	(149.999, 183.0]
Sp3	Tcf7	150	TRUE	(149.999, 183.0]
Mef2a	Ikzf1	150	FALSE	(149.999, 183.0]
E2f6	Nfkb2	150	FALSE	(149.999, 183.0]
Ikzf1	Hoxa5	150	FALSE	(149.999, 183.0]
Jun	Nr2c2	150	FALSE	(149.999, 183.0]
Kdm5a	Mef2a	150	FALSE	(149.999, 183.0]
Rxrb	Nr3c1	150	FALSE	(149.999, 183.0]
Irf1	Foxp1	150	FALSE	(149.999, 183.0]
Usf1	Fosb	150	FALSE	(149.999, 183.0]
Esrra	Rara	150	FALSE	(149.999, 183.0]
Rela	Creb3	151	FALSE	(149.999, 183.0]
Klf5	Taf1	151	FALSE	(149.999, 183.0]
Tead4	Cebpa	151	FALSE	(149.999, 183.0]
Ets2	Irf5	151	FALSE	(149.999, 183.0]
Sox10	Sp3	151	FALSE	(149.999, 183.0]
Atf7	Rela	151	FALSE	(149.999, 183.0]
Nfya	Irf1	151	FALSE	(149.999, 183.0]
Arid3a	Usf1	151	FALSE	(149.999, 183.0]
Rxrb	Foxo1	151	FALSE	(149.999, 183.0]
Cebpa	Tead4	151	FALSE	(149.999, 183.0]
Nr2c2	Sin3a	151	TRUE	(149.999, 183.0]
Atf4	Ets1	151	FALSE	(149.999, 183.0]
Batf	Gabpa	151	FALSE	(149.999, 183.0]
Foxo3	Foxc1	151	FALSE	(149.999, 183.0]
Ppard	Atf3	151	FALSE	(149.999, 183.0]
E2f7	Cebpb	151	FALSE	(149.999, 183.0]
Elk3	Usf1	151	FALSE	(149.999, 183.0]
Nfyb	Foxk1	151	FALSE	(149.999, 183.0]
Nfia	Elf4	151	FALSE	(149.999, 183.0]
Gmeb1	Bhlhe41	151	FALSE	(149.999, 183.0]
Pou2af1	Relb	151	TRUE	(149.999, 183.0]
Eomes	Patz1	151	FALSE	(149.999, 183.0]
Irf1	Nfya	151	FALSE	(149.999, 183.0]
Irf5	Ets2	151	FALSE	(149.999, 183.0]
Nfatc4	Fosl2	151	FALSE	(149.999, 183.0]
Sox2	Grhl1	151	FALSE	(149.999, 183.0]
Taf1	Klf5	151	FALSE	(149.999, 183.0]
Sin3a	Nr2c2	151	TRUE	(149.999, 183.0]
Sp3	Sox10	151	FALSE	(149.999, 183.0]
Junb	Mef2a	151	FALSE	(149.999, 183.0]
Eomes	Rela	151	FALSE	(149.999, 183.0]
Rel	Hsf1	151	FALSE	(149.999, 183.0]
Irf7	Fosl1	151	FALSE	(149.999, 183.0]
Nfya	Sox17	151	FALSE	(149.999, 183.0]
Sox17	Nfya	151	FALSE	(149.999, 183.0]
Foxk1	Nfyb	151	FALSE	(149.999, 183.0]
Usf1	Arid3a	151	FALSE	(149.999, 183.0]
Sox17	Ets1	151	FALSE	(149.999, 183.0]
Mef2a	Bcl3	151	FALSE	(149.999, 183.0]
Relb	Pou2af1	151	TRUE	(149.999, 183.0]
Fosl1	Irf7	151	FALSE	(149.999, 183.0]
Gata6	Tcf12	151	FALSE	(149.999, 183.0]
Ctcf	Elf3	151	FALSE	(149.999, 183.0]
Relb	Lef1	151	FALSE	(149.999, 183.0]
Tcf12	Gata6	151	FALSE	(149.999, 183.0]
Bcl3	Mef2a	151	FALSE	(149.999, 183.0]
Ets1	Sox17	151	FALSE	(149.999, 183.0]
Usf1	Elk3	151	FALSE	(149.999, 183.0]
Cebpb	Tef	151	FALSE	(149.999, 183.0]
Gabpa	Batf	151	FALSE	(149.999, 183.0]
Cebpb	E2f7	151	FALSE	(149.999, 183.0]
Mitf	Gabpa	151	FALSE	(149.999, 183.0]
Foxc1	Foxo3	151	FALSE	(149.999, 183.0]
Elf4	Nfia	151	FALSE	(149.999, 183.0]
Hsf1	Rel	151	FALSE	(149.999, 183.0]
Mef2a	Junb	151	FALSE	(149.999, 183.0]
Ets1	Atf4	151	FALSE	(149.999, 183.0]
Elf3	Ctcf	151	FALSE	(149.999, 183.0]
Tef	Cebpb	151	FALSE	(149.999, 183.0]
Creb3	Rela	151	FALSE	(149.999, 183.0]
Fosl2	Nfatc4	151	FALSE	(149.999, 183.0]
Lef1	Relb	151	FALSE	(149.999, 183.0]
Grhl1	Sox2	151	FALSE	(149.999, 183.0]
Foxo1	Rxrb	151	FALSE	(149.999, 183.0]
Pknox1	Sox2	151	FALSE	(149.999, 183.0]
Rela	Eomes	151	FALSE	(149.999, 183.0]
Atf3	Ppard	151	FALSE	(149.999, 183.0]
Cebpe	Tcf7l2	151	FALSE	(149.999, 183.0]
Patz1	Eomes	151	FALSE	(149.999, 183.0]
Rela	Atf7	151	FALSE	(149.999, 183.0]
Sox2	Pknox1	151	FALSE	(149.999, 183.0]
Bhlhe41	Gmeb1	151	FALSE	(149.999, 183.0]
Tcf7l2	Cebpe	151	FALSE	(149.999, 183.0]
Gabpa	Mitf	151	FALSE	(149.999, 183.0]
Stat1	Klf5	152	FALSE	(149.999, 183.0]
Nfe2	Fosb	152	FALSE	(149.999, 183.0]
Irf2	Lef1	152	TRUE	(149.999, 183.0]
Runx3	Fosl1	152	FALSE	(149.999, 183.0]
Nfyb	Nfkb2	152	FALSE	(149.999, 183.0]
Fosl1	Rara	152	FALSE	(149.999, 183.0]
Cebpb	Nfe2	152	FALSE	(149.999, 183.0]
Taf1	Mecp2	152	FALSE	(149.999, 183.0]
Rara	Irf8	152	TRUE	(149.999, 183.0]
Stat1	Rxrb	152	FALSE	(149.999, 183.0]
Nr1h3	Rarg	152	FALSE	(149.999, 183.0]
E2f4	Elk3	152	FALSE	(149.999, 183.0]
Nfe2	Cebpb	152	FALSE	(149.999, 183.0]
Nfkb2	Nfyb	152	FALSE	(149.999, 183.0]
Sox10	Mecp2	152	FALSE	(149.999, 183.0]
E2f1	Nr2f2	152	FALSE	(149.999, 183.0]
Stat5a	Nr2f2	152	FALSE	(149.999, 183.0]
Mecp2	Taf1	152	FALSE	(149.999, 183.0]
Rarg	Nr1h3	152	FALSE	(149.999, 183.0]
Cebpa	Pml	152	FALSE	(149.999, 183.0]
Gli1	Bcl3	152	FALSE	(149.999, 183.0]
Nfic	Nfatc2	152	FALSE	(149.999, 183.0]
Nfatc2	Nfic	152	FALSE	(149.999, 183.0]
Nfatc2	Irf2	152	FALSE	(149.999, 183.0]
Irf2	Nfatc2	152	FALSE	(149.999, 183.0]
Mecp2	Sox10	152	FALSE	(149.999, 183.0]
Sp1	Irf5	152	FALSE	(149.999, 183.0]
Rara	Fosl1	152	FALSE	(149.999, 183.0]
Nfia	Pknox1	152	FALSE	(149.999, 183.0]
Hoxc6	Pparg	152	FALSE	(149.999, 183.0]
Nr1h3	Gfi1	152	FALSE	(149.999, 183.0]
Irf2	Klf5	152	FALSE	(149.999, 183.0]
Pbx3	Nr3c1	152	FALSE	(149.999, 183.0]
Tcf7l2	Mxi1	152	FALSE	(149.999, 183.0]
Elk3	E2f4	152	FALSE	(149.999, 183.0]
Esrra	Cebpa	152	FALSE	(149.999, 183.0]
Nr3c1	Pbx3	152	FALSE	(149.999, 183.0]
Nr2f2	E2f1	152	FALSE	(149.999, 183.0]
Mxi1	Tcf7l2	152	FALSE	(149.999, 183.0]
Sox17	Fosl1	152	FALSE	(149.999, 183.0]
Pknox1	Nfia	152	FALSE	(149.999, 183.0]
Klf5	Irf2	152	FALSE	(149.999, 183.0]
Stat3	Tgif1	152	TRUE	(149.999, 183.0]
Pparg	Hoxa9	152	TRUE	(149.999, 183.0]
Elk3	Crem	152	FALSE	(149.999, 183.0]
Hoxa9	Pparg	152	TRUE	(149.999, 183.0]
Pml	Cebpa	152	FALSE	(149.999, 183.0]
Fosl1	Sox17	152	FALSE	(149.999, 183.0]
Lef1	Atf7	152	FALSE	(149.999, 183.0]
Tead4	Mafk	152	FALSE	(149.999, 183.0]
Patz1	Elf1	152	FALSE	(149.999, 183.0]
Nr2f2	Stat5a	152	FALSE	(149.999, 183.0]
Fosl1	Runx3	152	FALSE	(149.999, 183.0]
Esrra	Rxra	152	TRUE	(149.999, 183.0]
Klf5	Stat1	152	FALSE	(149.999, 183.0]
Irf8	Rara	152	TRUE	(149.999, 183.0]
Mafg	Irf1	152	FALSE	(149.999, 183.0]
Elf1	Patz1	152	FALSE	(149.999, 183.0]
Fosb	Nfe2	152	FALSE	(149.999, 183.0]
Elf2	Yy1	152	TRUE	(149.999, 183.0]
Foxc1	Cebpb	152	FALSE	(149.999, 183.0]
Lef1	Irf2	152	TRUE	(149.999, 183.0]
Bcl3	Gli1	152	FALSE	(149.999, 183.0]
Yy1	Elf2	152	TRUE	(149.999, 183.0]
Etv3	Ets1	152	TRUE	(149.999, 183.0]
Yy1	Hnf1b	152	FALSE	(149.999, 183.0]
Yy1	Crem	152	FALSE	(149.999, 183.0]
Gfi1	Nr1h3	152	FALSE	(149.999, 183.0]
Ets1	Etv3	152	TRUE	(149.999, 183.0]
Irf5	Sp1	152	FALSE	(149.999, 183.0]
Nr2c2	Fos	152	FALSE	(149.999, 183.0]
Tgif1	Stat3	152	TRUE	(149.999, 183.0]
Irf1	Mafg	152	FALSE	(149.999, 183.0]
Rxra	Esrra	152	TRUE	(149.999, 183.0]
Rxrb	Stat1	152	FALSE	(149.999, 183.0]
Cebpa	Esrra	152	FALSE	(149.999, 183.0]
Hlf	Spib	152	FALSE	(149.999, 183.0]
Hnf1b	Yy1	152	FALSE	(149.999, 183.0]
Crem	Yy1	152	FALSE	(149.999, 183.0]
Fos	Nr2c2	152	FALSE	(149.999, 183.0]
Crem	Elk3	152	FALSE	(149.999, 183.0]
Pou2af1	Klf1	152	FALSE	(149.999, 183.0]
Pparg	Hoxc6	152	FALSE	(149.999, 183.0]
Cebpb	Foxc1	152	FALSE	(149.999, 183.0]
Klf1	Pou2af1	152	FALSE	(149.999, 183.0]
Mafk	Tead4	152	FALSE	(149.999, 183.0]
Spib	Hlf	152	FALSE	(149.999, 183.0]
Atf7	Lef1	152	FALSE	(149.999, 183.0]
Maff	Stat5a	153	FALSE	(149.999, 183.0]
Elk4	Tfe3	153	FALSE	(149.999, 183.0]
Spib	E2f7	153	FALSE	(149.999, 183.0]
Irf3	Srebf1	153	FALSE	(149.999, 183.0]
E2f7	Spib	153	FALSE	(149.999, 183.0]
Gabpa	Arid3a	153	FALSE	(149.999, 183.0]
E2f7	Ep300	153	FALSE	(149.999, 183.0]
Bach1	Jun	153	FALSE	(149.999, 183.0]
Tcf7	Hoxa9	153	FALSE	(149.999, 183.0]
Batf	Sin3a	153	FALSE	(149.999, 183.0]
Nr2f2	Mecp2	153	FALSE	(149.999, 183.0]
Hoxc6	Trp53	153	FALSE	(149.999, 183.0]
Mafb	Pml	153	FALSE	(149.999, 183.0]
Hlf	Foxo3	153	FALSE	(149.999, 183.0]
Stat5a	Maff	153	FALSE	(149.999, 183.0]
Nr3c1	Elk4	153	TRUE	(149.999, 183.0]
Etv3	Pou2af1	153	FALSE	(149.999, 183.0]
Elk4	Nr3c1	153	TRUE	(149.999, 183.0]
Jund	Hdac2	153	FALSE	(149.999, 183.0]
Elf4	Lef1	153	FALSE	(149.999, 183.0]
Nfyb	E2f2	153	TRUE	(149.999, 183.0]
Hsf1	Setdb1	153	FALSE	(149.999, 183.0]
Mafb	Tcf7l2	153	FALSE	(149.999, 183.0]
Ikzf1	Tfe3	153	FALSE	(149.999, 183.0]
Pml	Mafb	153	FALSE	(149.999, 183.0]
Hsf1	Foxc1	153	FALSE	(149.999, 183.0]
Tfe3	Elk4	153	FALSE	(149.999, 183.0]
Pml	Atf7	153	FALSE	(149.999, 183.0]
Irf8	Klf5	153	FALSE	(149.999, 183.0]
Sox17	Stat5a	153	FALSE	(149.999, 183.0]
Tcf7l2	Mafb	153	FALSE	(149.999, 183.0]
Mecp2	Nr2f2	153	FALSE	(149.999, 183.0]
Pml	Tbx2	153	FALSE	(149.999, 183.0]
Arid3a	Gabpa	153	FALSE	(149.999, 183.0]
Hoxb7	Usf2	153	FALSE	(149.999, 183.0]
Hcfc1	Usf2	153	FALSE	(149.999, 183.0]
Setdb1	Hsf1	153	FALSE	(149.999, 183.0]
Hdac2	Jund	153	FALSE	(149.999, 183.0]
Sox11	Atf4	153	FALSE	(149.999, 183.0]
Hoxa9	Tcf7	153	FALSE	(149.999, 183.0]
Hoxb2	Trp53	153	FALSE	(149.999, 183.0]
Tfe3	Ikzf1	153	FALSE	(149.999, 183.0]
Usf2	Hcfc1	153	FALSE	(149.999, 183.0]
Klf5	Foxc1	153	FALSE	(149.999, 183.0]
Tead2	Gmeb2	153	FALSE	(149.999, 183.0]
Junb	Klf15	153	FALSE	(149.999, 183.0]
E2f2	Nfyb	153	TRUE	(149.999, 183.0]
Stat5a	Sox17	153	FALSE	(149.999, 183.0]
Gata3	E2f2	153	FALSE	(149.999, 183.0]
Trp53	Hoxb2	153	FALSE	(149.999, 183.0]
Foxo3	Hlf	153	FALSE	(149.999, 183.0]
Egr1	Mafg	153	FALSE	(149.999, 183.0]
E2f2	Ctcf	153	TRUE	(149.999, 183.0]
Egr1	Hnf1b	153	FALSE	(149.999, 183.0]
Sp3	Taf1	153	TRUE	(149.999, 183.0]
Trp53	Hoxc6	153	FALSE	(149.999, 183.0]
Atf7	Pml	153	FALSE	(149.999, 183.0]
Sp3	Foxp1	153	FALSE	(149.999, 183.0]
Lef1	Elf4	153	FALSE	(149.999, 183.0]
Hnf1b	Egr1	153	FALSE	(149.999, 183.0]
Foxp1	Sp3	153	FALSE	(149.999, 183.0]
Klf5	Irf8	153	FALSE	(149.999, 183.0]
Sin3a	Batf	153	FALSE	(149.999, 183.0]
Tbx2	Pml	153	FALSE	(149.999, 183.0]
Klf15	Junb	153	FALSE	(149.999, 183.0]
Gmeb2	Tead2	153	FALSE	(149.999, 183.0]
Foxc1	Klf5	153	FALSE	(149.999, 183.0]
Atf4	Sox11	153	FALSE	(149.999, 183.0]
Ep300	E2f7	153	FALSE	(149.999, 183.0]
Foxc1	Hsf1	153	FALSE	(149.999, 183.0]
Pou2af1	Etv3	153	FALSE	(149.999, 183.0]
Srebf1	Irf3	153	FALSE	(149.999, 183.0]
Mafg	Egr1	153	FALSE	(149.999, 183.0]
Jun	Bach1	153	FALSE	(149.999, 183.0]
E2f2	Gata3	153	FALSE	(149.999, 183.0]
Taf1	Sp3	153	TRUE	(149.999, 183.0]
Ctcf	E2f2	153	TRUE	(149.999, 183.0]
Usf2	Hoxb7	153	FALSE	(149.999, 183.0]
Tfe3	Patz1	154	FALSE	(149.999, 183.0]
Rxrb	Gabpa	154	FALSE	(149.999, 183.0]
Rxrb	Foxp2	154	FALSE	(149.999, 183.0]
Gata2	Nr1h3	154	FALSE	(149.999, 183.0]
Cebpb	Hlf	154	FALSE	(149.999, 183.0]
Pbx3	Jun	154	FALSE	(149.999, 183.0]
Sp3	Gata2	154	FALSE	(149.999, 183.0]
Sox10	Nfic	154	FALSE	(149.999, 183.0]
Ppard	Gata2	154	FALSE	(149.999, 183.0]
Elk3	Foxp1	154	FALSE	(149.999, 183.0]
Elk3	Foxp2	154	FALSE	(149.999, 183.0]
Elk3	Tcf7l2	154	FALSE	(149.999, 183.0]
Ikzf1	Srebf1	154	FALSE	(149.999, 183.0]
Pbx3	Stat5a	154	FALSE	(149.999, 183.0]
Foxo1	Tead4	154	FALSE	(149.999, 183.0]
Tead4	Foxo1	154	FALSE	(149.999, 183.0]
Nr2f2	Hoxb5	154	TRUE	(149.999, 183.0]
Stat5b	Sox17	154	FALSE	(149.999, 183.0]
Foxp2	Elk3	154	FALSE	(149.999, 183.0]
Foxp2	Rxrb	154	FALSE	(149.999, 183.0]
Setdb1	Cebpb	154	FALSE	(149.999, 183.0]
Irf3	Mef2d	154	TRUE	(149.999, 183.0]
Tef	Fosl2	154	FALSE	(149.999, 183.0]
Jun	Pbx3	154	FALSE	(149.999, 183.0]
Fosl2	Mitf	154	TRUE	(149.999, 183.0]
Ets1	Hoxc10	154	FALSE	(149.999, 183.0]
Gli2	Srf	154	FALSE	(149.999, 183.0]
Gata2	Ppard	154	FALSE	(149.999, 183.0]
Fosl2	Tef	154	FALSE	(149.999, 183.0]
Mxi1	Bach1	154	TRUE	(149.999, 183.0]
Xbp1	Sp4	154	FALSE	(149.999, 183.0]
Patz1	Tfe3	154	FALSE	(149.999, 183.0]
Gata2	Sp3	154	FALSE	(149.999, 183.0]
Bach1	Mxi1	154	TRUE	(149.999, 183.0]
Gata3	Tead3	154	FALSE	(149.999, 183.0]
Foxp2	Elk1	154	FALSE	(149.999, 183.0]
Foxp1	Elk1	154	FALSE	(149.999, 183.0]
Gata2	Irf2	154	FALSE	(149.999, 183.0]
Hlf	Cebpb	154	FALSE	(149.999, 183.0]
Foxo1	Nr2f6	154	FALSE	(149.999, 183.0]
Foxp1	Elk3	154	FALSE	(149.999, 183.0]
Nr2f6	Foxo1	154	FALSE	(149.999, 183.0]
Ddit3	Ets2	154	FALSE	(149.999, 183.0]
Tead3	Gata3	154	FALSE	(149.999, 183.0]
Gata3	Nfic	154	FALSE	(149.999, 183.0]
Sin3a	Srebf1	154	FALSE	(149.999, 183.0]
Pou2af1	E2f2	154	FALSE	(149.999, 183.0]
Srf	Gli2	154	FALSE	(149.999, 183.0]
Tcf7l2	Elk3	154	FALSE	(149.999, 183.0]
Cebpb	Setdb1	154	FALSE	(149.999, 183.0]
Sox17	Stat5b	154	FALSE	(149.999, 183.0]
Mitf	Fosl2	154	TRUE	(149.999, 183.0]
Cebpe	Gabpa	154	FALSE	(149.999, 183.0]
Gabpa	Cebpe	154	FALSE	(149.999, 183.0]
Mef2d	Irf3	154	TRUE	(149.999, 183.0]
Stat5a	Pbx3	154	FALSE	(149.999, 183.0]
Hoxb5	Nr2f2	154	TRUE	(149.999, 183.0]
E2f2	Pou2af1	154	FALSE	(149.999, 183.0]
Nr1h3	Gata2	154	FALSE	(149.999, 183.0]
Ets2	Ddit3	154	FALSE	(149.999, 183.0]
Srebf1	Sin3a	154	FALSE	(149.999, 183.0]
Gabpa	Rxrb	154	FALSE	(149.999, 183.0]
Nfic	Gata3	154	FALSE	(149.999, 183.0]
Elk1	Foxp1	154	FALSE	(149.999, 183.0]
Elk1	Foxp2	154	FALSE	(149.999, 183.0]
Srebf1	Ikzf1	154	FALSE	(149.999, 183.0]
Irf2	Gata2	154	FALSE	(149.999, 183.0]
Nfic	Sox10	154	FALSE	(149.999, 183.0]
Hoxc10	Ets1	154	FALSE	(149.999, 183.0]
Sp4	Xbp1	154	FALSE	(149.999, 183.0]
Fosl1	Ehf	155	TRUE	(149.999, 183.0]
Gata3	Mxi1	155	FALSE	(149.999, 183.0]
Nr2f6	Srebf1	155	TRUE	(149.999, 183.0]
Foxp1	Pparg	155	FALSE	(149.999, 183.0]
Foxp2	Nfya	155	FALSE	(149.999, 183.0]
Dbp	Tcf7	155	FALSE	(149.999, 183.0]
Hoxb2	Sox11	155	FALSE	(149.999, 183.0]
Sp1	Foxa2	155	FALSE	(149.999, 183.0]
Dbp	Stat1	155	FALSE	(149.999, 183.0]
Kdm5a	Stat1	155	TRUE	(149.999, 183.0]
Bhlhe41	Pou2af1	155	FALSE	(149.999, 183.0]
Nr3c1	Tcf7	155	FALSE	(149.999, 183.0]
Pparg	Foxp1	155	FALSE	(149.999, 183.0]
Stat3	Dbp	155	FALSE	(149.999, 183.0]
Dbp	Stat5b	155	FALSE	(149.999, 183.0]
Dbp	Stat6	155	FALSE	(149.999, 183.0]
Creb3	Usf2	155	FALSE	(149.999, 183.0]
Pknox1	Hoxa7	155	FALSE	(149.999, 183.0]
Cebpz	Nfil3	155	FALSE	(149.999, 183.0]
Fosl2	Tal1	155	FALSE	(149.999, 183.0]
Klf5	Tcf12	155	FALSE	(149.999, 183.0]
Srebf1	Tead4	155	FALSE	(149.999, 183.0]
Hdac2	Nfatc2	155	FALSE	(149.999, 183.0]
Ep300	Hlf	155	FALSE	(149.999, 183.0]
Foxo1	Tbx2	155	FALSE	(149.999, 183.0]
Dbp	Stat3	155	FALSE	(149.999, 183.0]
Dbp	Stat5a	155	FALSE	(149.999, 183.0]
Mef2a	Hoxa5	155	FALSE	(149.999, 183.0]
Foxk1	Cebpb	155	FALSE	(149.999, 183.0]
Stat6	Tcf7l2	155	FALSE	(149.999, 183.0]
Hoxa5	Mef2a	155	FALSE	(149.999, 183.0]
Tcf7	Nr3c1	155	FALSE	(149.999, 183.0]
Stat5b	Tbx2	155	FALSE	(149.999, 183.0]
Fosl2	E2f4	155	FALSE	(149.999, 183.0]
Tcf7	Irf1	155	FALSE	(149.999, 183.0]
Stat6	Dbp	155	FALSE	(149.999, 183.0]
Stat5b	Dbp	155	FALSE	(149.999, 183.0]
Stat6	Hlf	155	FALSE	(149.999, 183.0]
Fosb	Mafb	155	FALSE	(149.999, 183.0]
Stat6	Gli1	155	FALSE	(149.999, 183.0]
Cebpb	Foxk1	155	FALSE	(149.999, 183.0]
Foxc1	Ikzf1	155	FALSE	(149.999, 183.0]
Ehf	Fosl1	155	TRUE	(149.999, 183.0]
Nr2f2	Cebpa	155	FALSE	(149.999, 183.0]
Nfic	Runx3	155	FALSE	(149.999, 183.0]
Tal1	Fosl2	155	FALSE	(149.999, 183.0]
Tcf7	Dbp	155	FALSE	(149.999, 183.0]
Kdm5a	Hoxa7	155	FALSE	(149.999, 183.0]
Klf5	Klf16	155	TRUE	(149.999, 183.0]
Klf16	Klf5	155	TRUE	(149.999, 183.0]
Tbx2	Foxo1	155	FALSE	(149.999, 183.0]
Foxa2	Klf1	155	FALSE	(149.999, 183.0]
Foxa2	Sp1	155	FALSE	(149.999, 183.0]
Elk4	Sox2	155	FALSE	(149.999, 183.0]
Mxi1	Gata3	155	FALSE	(149.999, 183.0]
Tead2	Ikzf1	155	FALSE	(149.999, 183.0]
Mef2a	Mafb	155	TRUE	(149.999, 183.0]
Tbx2	Stat5b	155	FALSE	(149.999, 183.0]
Elf4	Foxo3	155	FALSE	(149.999, 183.0]
Mef2a	Rel	155	FALSE	(149.999, 183.0]
Nfic	Creb3l1	155	TRUE	(149.999, 183.0]
Tcf12	Klf5	155	FALSE	(149.999, 183.0]
Stat5a	Dbp	155	FALSE	(149.999, 183.0]
Stat5b	Hlf	155	FALSE	(149.999, 183.0]
Foxo3	Elf4	155	FALSE	(149.999, 183.0]
Mafb	Mef2a	155	TRUE	(149.999, 183.0]
Pknox1	Sp3	155	FALSE	(149.999, 183.0]
Stat1	Kdm5a	155	TRUE	(149.999, 183.0]
Ets2	Nfia	155	FALSE	(149.999, 183.0]
Usf2	Creb3	155	FALSE	(149.999, 183.0]
Hlf	Stat5b	155	FALSE	(149.999, 183.0]
Creb3l1	Nfic	155	TRUE	(149.999, 183.0]
Tfe3	Taf7	155	FALSE	(149.999, 183.0]
Sp3	Pknox1	155	FALSE	(149.999, 183.0]
Tcf7l2	Stat6	155	FALSE	(149.999, 183.0]
Hlf	Stat6	155	FALSE	(149.999, 183.0]
Stat1	Dbp	155	FALSE	(149.999, 183.0]
Pitx2	Pparg	155	FALSE	(149.999, 183.0]
Srebf1	Nr2f6	155	TRUE	(149.999, 183.0]
Nfatc2	Hdac2	155	FALSE	(149.999, 183.0]
Mitf	Taf7	155	FALSE	(149.999, 183.0]
Nfil3	Cebpz	155	FALSE	(149.999, 183.0]
Irf5	Fos	155	FALSE	(149.999, 183.0]
Taf7	Mitf	155	FALSE	(149.999, 183.0]
Taf7	Tfe3	155	FALSE	(149.999, 183.0]
Cebpa	Nr2f2	155	FALSE	(149.999, 183.0]
Stat5a	Hlf	155	FALSE	(149.999, 183.0]
Hlf	Ep300	155	FALSE	(149.999, 183.0]
Ikzf1	Tead2	155	FALSE	(149.999, 183.0]
Sox17	Pbx3	155	FALSE	(149.999, 183.0]
Hoxa7	Pknox1	155	FALSE	(149.999, 183.0]
Nfia	Ets2	155	FALSE	(149.999, 183.0]
Pparg	Pitx2	155	FALSE	(149.999, 183.0]
Sox2	Elk4	155	FALSE	(149.999, 183.0]
Irf1	Tcf7	155	FALSE	(149.999, 183.0]
Gli1	Stat6	155	FALSE	(149.999, 183.0]
Pou2af1	Bhlhe41	155	FALSE	(149.999, 183.0]
Nfya	Foxp2	155	FALSE	(149.999, 183.0]
Hlf	Stat5a	155	FALSE	(149.999, 183.0]
Pbx3	Sox17	155	FALSE	(149.999, 183.0]
Sox11	Hoxb2	155	FALSE	(149.999, 183.0]
Hoxa7	Kdm5a	155	FALSE	(149.999, 183.0]
Tead4	Srebf1	155	FALSE	(149.999, 183.0]
Runx3	Nfic	155	FALSE	(149.999, 183.0]
Ikzf1	Foxc1	155	FALSE	(149.999, 183.0]
Mafb	Fosb	155	FALSE	(149.999, 183.0]
Rel	Mef2a	155	FALSE	(149.999, 183.0]
E2f4	Fosl2	155	FALSE	(149.999, 183.0]
Fos	Irf5	155	FALSE	(149.999, 183.0]
Klf1	Foxa2	155	FALSE	(149.999, 183.0]
Gtf2b	Hoxb7	156	FALSE	(149.999, 183.0]
Tbx2	Stat3	156	FALSE	(149.999, 183.0]
Lef1	Rest	156	FALSE	(149.999, 183.0]
Setdb1	E2f1	156	FALSE	(149.999, 183.0]
Ehf	Tcf7	156	FALSE	(149.999, 183.0]
Gtf2b	Cebpe	156	FALSE	(149.999, 183.0]
Hlf	Gtf2b	156	FALSE	(149.999, 183.0]
Foxc1	Klf15	156	FALSE	(149.999, 183.0]
Usf1	Pknox1	156	FALSE	(149.999, 183.0]
E2f1	Setdb1	156	FALSE	(149.999, 183.0]
Egr2	Nfya	156	FALSE	(149.999, 183.0]
Foxc1	Pparg	156	FALSE	(149.999, 183.0]
Bhlhe41	Stat5a	156	TRUE	(149.999, 183.0]
Hoxa5	Cebpb	156	FALSE	(149.999, 183.0]
Bhlhe41	Stat3	156	FALSE	(149.999, 183.0]
Tcf12	Foxa2	156	FALSE	(149.999, 183.0]
Ctcf	Xbp1	156	FALSE	(149.999, 183.0]
Klf5	Fosb	156	FALSE	(149.999, 183.0]
E2f1	Nfia	156	FALSE	(149.999, 183.0]
Arid3a	Nfya	156	FALSE	(149.999, 183.0]
Tcf7	Fli1	156	FALSE	(149.999, 183.0]
Fosb	Klf5	156	FALSE	(149.999, 183.0]
Gtf2b	Hlf	156	FALSE	(149.999, 183.0]
Gtf2b	Dbp	156	FALSE	(149.999, 183.0]
Tcf7	Ehf	156	FALSE	(149.999, 183.0]
Rara	E2f2	156	FALSE	(149.999, 183.0]
Nfia	E2f1	156	FALSE	(149.999, 183.0]
Elf1	Klf16	156	FALSE	(149.999, 183.0]
Nfya	Arid3a	156	FALSE	(149.999, 183.0]
Cebpb	Hoxa5	156	FALSE	(149.999, 183.0]
Foxa2	Tcf12	156	FALSE	(149.999, 183.0]
Fli1	Gata3	156	FALSE	(149.999, 183.0]
Gtf2b	Rxra	156	FALSE	(149.999, 183.0]
Dbp	Gtf2b	156	FALSE	(149.999, 183.0]
Egr1	Ikzf1	156	FALSE	(149.999, 183.0]
Pknox1	Usf1	156	FALSE	(149.999, 183.0]
Fosl2	Rest	156	FALSE	(149.999, 183.0]
Stat3	Tbx2	156	FALSE	(149.999, 183.0]
Nr1h3	Spib	156	FALSE	(149.999, 183.0]
Crem	Gata3	156	TRUE	(149.999, 183.0]
Cebpe	Gtf2b	156	FALSE	(149.999, 183.0]
Hdac2	Hoxa5	156	TRUE	(149.999, 183.0]
Irf9	Klf1	156	FALSE	(149.999, 183.0]
Nr3c1	Mitf	156	FALSE	(149.999, 183.0]
Mitf	Nr3c1	156	FALSE	(149.999, 183.0]
Stat3	Bhlhe41	156	FALSE	(149.999, 183.0]
Tead4	Usf2	156	FALSE	(149.999, 183.0]
Rest	Fosl2	156	FALSE	(149.999, 183.0]
Klf16	Elf1	156	FALSE	(149.999, 183.0]
Usf2	Tead4	156	FALSE	(149.999, 183.0]
Rest	Lef1	156	FALSE	(149.999, 183.0]
Spib	Nr1h3	156	FALSE	(149.999, 183.0]
Klf1	Irf9	156	FALSE	(149.999, 183.0]
Rxra	Gtf2b	156	FALSE	(149.999, 183.0]
Fli1	Tcf7	156	FALSE	(149.999, 183.0]
Srebf1	Tead2	156	FALSE	(149.999, 183.0]
Xbp1	Ctcf	156	FALSE	(149.999, 183.0]
Nr2c2	Nfya	156	TRUE	(149.999, 183.0]
Pparg	Foxc1	156	FALSE	(149.999, 183.0]
Tead2	Srebf1	156	FALSE	(149.999, 183.0]
Gata3	Fli1	156	FALSE	(149.999, 183.0]
Hoxa5	Hdac2	156	TRUE	(149.999, 183.0]
Hoxb7	Gtf2b	156	FALSE	(149.999, 183.0]
Nfya	Nr2c2	156	TRUE	(149.999, 183.0]
E2f2	Gli1	156	FALSE	(149.999, 183.0]
Stat5a	Bhlhe41	156	TRUE	(149.999, 183.0]
Nfya	Egr2	156	FALSE	(149.999, 183.0]
Gata3	Crem	156	TRUE	(149.999, 183.0]
E2f2	Rara	156	FALSE	(149.999, 183.0]
Ikzf1	Egr1	156	FALSE	(149.999, 183.0]
Klf15	Foxc1	156	FALSE	(149.999, 183.0]
Gli1	E2f2	156	FALSE	(149.999, 183.0]
Sox2	Mafk	157	FALSE	(149.999, 183.0]
Gata2	Pou2af1	157	FALSE	(149.999, 183.0]
Kdm5a	Stat6	157	FALSE	(149.999, 183.0]
Egr2	Ppard	157	FALSE	(149.999, 183.0]
Fosl1	Rarg	157	TRUE	(149.999, 183.0]
Taf1	Foxo3	157	FALSE	(149.999, 183.0]
Elf4	Nfyb	157	FALSE	(149.999, 183.0]
Fosl1	Taf1	157	FALSE	(149.999, 183.0]
Gabpa	Rest	157	TRUE	(149.999, 183.0]
Relb	Tcf12	157	FALSE	(149.999, 183.0]
Stat6	Srebf1	157	FALSE	(149.999, 183.0]
Sp3	Hsf1	157	FALSE	(149.999, 183.0]
Nr1h3	Nfyb	157	FALSE	(149.999, 183.0]
Hoxb2	Klf16	157	FALSE	(149.999, 183.0]
Taf1	Fosl1	157	FALSE	(149.999, 183.0]
Jun	Rxrb	157	FALSE	(149.999, 183.0]
Stat6	Kdm5a	157	FALSE	(149.999, 183.0]
Nfkb2	Xbp1	157	FALSE	(149.999, 183.0]
Foxa2	Nfyb	157	FALSE	(149.999, 183.0]
Nr1h3	Rest	157	FALSE	(149.999, 183.0]
Mafk	Sox2	157	FALSE	(149.999, 183.0]
Rest	Nr1h3	157	FALSE	(149.999, 183.0]
Ppard	Egr2	157	FALSE	(149.999, 183.0]
Nfyb	Elf4	157	FALSE	(149.999, 183.0]
Taf7	Elf3	157	FALSE	(149.999, 183.0]
Mafk	Ikzf1	157	FALSE	(149.999, 183.0]
Hsf1	Sp3	157	FALSE	(149.999, 183.0]
Nfe2	Arid3a	157	TRUE	(149.999, 183.0]
Nfyb	Nr1h3	157	FALSE	(149.999, 183.0]
E2f7	Hdac2	157	TRUE	(149.999, 183.0]
Elk4	Nfic	157	FALSE	(149.999, 183.0]
Stat3	Elf1	157	FALSE	(149.999, 183.0]
Rxrb	Jun	157	FALSE	(149.999, 183.0]
Foxp2	Hoxc6	157	FALSE	(149.999, 183.0]
Hoxc6	Foxp2	157	FALSE	(149.999, 183.0]
Hdac2	E2f7	157	TRUE	(149.999, 183.0]
Arid3a	Nfe2	157	TRUE	(149.999, 183.0]
Nfatc2	Elk4	157	FALSE	(149.999, 183.0]
Junb	Msx1	157	FALSE	(149.999, 183.0]
Klf16	Hoxb2	157	FALSE	(149.999, 183.0]
Foxo3	Taf1	157	FALSE	(149.999, 183.0]
Elk4	Nfatc2	157	FALSE	(149.999, 183.0]
Xbp1	Nfkb2	157	FALSE	(149.999, 183.0]
Rest	Gabpa	157	TRUE	(149.999, 183.0]
Elf1	Stat3	157	FALSE	(149.999, 183.0]
Rarg	Fosl1	157	TRUE	(149.999, 183.0]
Srebf1	Stat6	157	FALSE	(149.999, 183.0]
Foxp1	Rela	157	FALSE	(149.999, 183.0]
Msx1	Junb	157	FALSE	(149.999, 183.0]
Fosb	Foxo3	157	FALSE	(149.999, 183.0]
Pou2af1	Gata2	157	FALSE	(149.999, 183.0]
Foxp1	Runx3	157	TRUE	(149.999, 183.0]
Ikzf1	Mafk	157	FALSE	(149.999, 183.0]
Rela	Foxp1	157	FALSE	(149.999, 183.0]
Nfic	Elk4	157	FALSE	(149.999, 183.0]
Nfyb	Foxa2	157	FALSE	(149.999, 183.0]
Foxo3	Fosb	157	FALSE	(149.999, 183.0]
Tcf12	Relb	157	FALSE	(149.999, 183.0]
Elf3	Taf7	157	FALSE	(149.999, 183.0]
Runx3	Foxp1	157	TRUE	(149.999, 183.0]
Hoxc6	Klf5	158	FALSE	(149.999, 183.0]
Hoxc6	Sin3a	158	FALSE	(149.999, 183.0]
Patz1	Elf3	158	FALSE	(149.999, 183.0]
Foxp2	Ets1	158	FALSE	(149.999, 183.0]
Klf5	Pbx3	158	FALSE	(149.999, 183.0]
Klf5	Hoxc6	158	FALSE	(149.999, 183.0]
Tfe3	Nr2f6	158	FALSE	(149.999, 183.0]
Hcfc1	E2f7	158	TRUE	(149.999, 183.0]
E2f1	Egr2	158	FALSE	(149.999, 183.0]
Pparg	Junb	158	FALSE	(149.999, 183.0]
Hlf	Foxo1	158	FALSE	(149.999, 183.0]
Fos	Rxrb	158	FALSE	(149.999, 183.0]
Msx1	Rarg	158	FALSE	(149.999, 183.0]
Nfyb	Fosl1	158	FALSE	(149.999, 183.0]
Fosl1	Nfyb	158	FALSE	(149.999, 183.0]
Ikzf1	Nr2f2	158	FALSE	(149.999, 183.0]
Nfatc4	Gtf2b	158	FALSE	(149.999, 183.0]
Pbx3	Klf5	158	FALSE	(149.999, 183.0]
Gtf2b	Nfatc4	158	FALSE	(149.999, 183.0]
Egr2	Hoxa9	158	FALSE	(149.999, 183.0]
Nfic	Mxi1	158	FALSE	(149.999, 183.0]
Sp1	Taf7	158	FALSE	(149.999, 183.0]
Gabpa	Nfyb	158	TRUE	(149.999, 183.0]
Gabpa	Klf5	158	FALSE	(149.999, 183.0]
Rara	Sp3	158	FALSE	(149.999, 183.0]
Rara	Lef1	158	FALSE	(149.999, 183.0]
Sin3a	Ets2	158	FALSE	(149.999, 183.0]
Srebf1	Tcf12	158	FALSE	(149.999, 183.0]
Egr1	Irf9	158	FALSE	(149.999, 183.0]
Bdp1	Myc	158	FALSE	(149.999, 183.0]
Taf1	Atf7	158	FALSE	(149.999, 183.0]
Egr2	E2f1	158	FALSE	(149.999, 183.0]
Cebpe	Nr3c1	158	TRUE	(149.999, 183.0]
Tgif1	Klf16	158	TRUE	(149.999, 183.0]
E2f4	Creb3	158	FALSE	(149.999, 183.0]
Taf7	Sp1	158	FALSE	(149.999, 183.0]
Taf7	Klf5	158	FALSE	(149.999, 183.0]
Irf2	Gtf2b	158	FALSE	(149.999, 183.0]
Nfyb	Gabpa	158	TRUE	(149.999, 183.0]
Junb	Pparg	158	FALSE	(149.999, 183.0]
Irf9	Egr1	158	FALSE	(149.999, 183.0]
Klf16	Tgif1	158	TRUE	(149.999, 183.0]
E2f7	Hcfc1	158	TRUE	(149.999, 183.0]
Gtf2b	Irf2	158	FALSE	(149.999, 183.0]
Klf5	Taf7	158	FALSE	(149.999, 183.0]
Eomes	Irf1	158	FALSE	(149.999, 183.0]
Snai3	Gata6	158	FALSE	(149.999, 183.0]
Usf2	Srf	158	FALSE	(149.999, 183.0]
Sp3	Rara	158	FALSE	(149.999, 183.0]
Irf1	Eomes	158	FALSE	(149.999, 183.0]
Hnf1b	Foxo1	158	FALSE	(149.999, 183.0]
Lef1	Rara	158	FALSE	(149.999, 183.0]
Rarg	Msx1	158	FALSE	(149.999, 183.0]
Atf7	Taf1	158	FALSE	(149.999, 183.0]
Myc	Bdp1	158	FALSE	(149.999, 183.0]
Nr2f6	Tfe3	158	FALSE	(149.999, 183.0]
Grhl1	Ctcf	158	FALSE	(149.999, 183.0]
Mxi1	Nfic	158	FALSE	(149.999, 183.0]
Klf5	Gabpa	158	FALSE	(149.999, 183.0]
Fosl2	Nr2f6	158	FALSE	(149.999, 183.0]
Gli2	Nfatc4	158	TRUE	(149.999, 183.0]
Ets2	Sin3a	158	FALSE	(149.999, 183.0]
Tcf12	Tef	158	FALSE	(149.999, 183.0]
Gata6	Snai3	158	FALSE	(149.999, 183.0]
Elf3	Patz1	158	FALSE	(149.999, 183.0]
Mafg	Gata2	158	FALSE	(149.999, 183.0]
Ctcf	Grhl1	158	FALSE	(149.999, 183.0]
Irf8	Tcf7	158	FALSE	(149.999, 183.0]
Tcf7	Irf8	158	FALSE	(149.999, 183.0]
Tcf7	Tbx2	158	FALSE	(149.999, 183.0]
Nr2f2	Ikzf1	158	FALSE	(149.999, 183.0]
Tcf12	Srebf1	158	FALSE	(149.999, 183.0]
Srf	Usf2	158	FALSE	(149.999, 183.0]
Nfatc4	Gli2	158	TRUE	(149.999, 183.0]
Rxrb	Fos	158	FALSE	(149.999, 183.0]
Gata2	Mafg	158	FALSE	(149.999, 183.0]
Tbx2	Tcf7	158	FALSE	(149.999, 183.0]
Sin3a	Hoxc6	158	FALSE	(149.999, 183.0]
Foxo1	Hlf	158	FALSE	(149.999, 183.0]
Tef	Tcf12	158	FALSE	(149.999, 183.0]
Foxo1	Hnf1b	158	FALSE	(149.999, 183.0]
Hoxa9	Egr2	158	FALSE	(149.999, 183.0]
Nr2f6	Fosl2	158	FALSE	(149.999, 183.0]
Creb3	E2f4	158	FALSE	(149.999, 183.0]
Nr3c1	Cebpe	158	TRUE	(149.999, 183.0]
Ets1	Foxp2	158	FALSE	(149.999, 183.0]
Sox10	Rara	159	FALSE	(149.999, 183.0]
Bcl3	Tfe3	159	FALSE	(149.999, 183.0]
Mafk	Stat5a	159	FALSE	(149.999, 183.0]
Irf5	Xbp1	159	FALSE	(149.999, 183.0]
Tcf12	Cebpa	159	FALSE	(149.999, 183.0]
Ctcf	Maff	159	FALSE	(149.999, 183.0]
Egr2	Atf4	159	TRUE	(149.999, 183.0]
Sp4	Ep300	159	TRUE	(149.999, 183.0]
Tcf12	Hoxb5	159	FALSE	(149.999, 183.0]
Mef2d	Stat1	159	FALSE	(149.999, 183.0]
Klf1	Stat5b	159	FALSE	(149.999, 183.0]
Elk3	Fos	159	FALSE	(149.999, 183.0]
Nfya	Irf2	159	FALSE	(149.999, 183.0]
Bcl3	Nfe2	159	FALSE	(149.999, 183.0]
Creb3	Fli1	159	FALSE	(149.999, 183.0]
Ets1	Ddit3	159	FALSE	(149.999, 183.0]
Ddit3	Bach1	159	FALSE	(149.999, 183.0]
Foxo1	Irf3	159	FALSE	(149.999, 183.0]
Creb3	Maff	159	FALSE	(149.999, 183.0]
Ehf	Trp53	159	FALSE	(149.999, 183.0]
Fosl2	Rxrb	159	FALSE	(149.999, 183.0]
Ehf	Cebpa	159	FALSE	(149.999, 183.0]
Ep300	Sp4	159	TRUE	(149.999, 183.0]
Sp1	Runx3	159	FALSE	(149.999, 183.0]
Stat5a	Mafk	159	FALSE	(149.999, 183.0]
Elf2	Nfil3	159	FALSE	(149.999, 183.0]
Trp53	Ehf	159	FALSE	(149.999, 183.0]
Elf1	Foxp2	159	FALSE	(149.999, 183.0]
Runx3	Sp1	159	FALSE	(149.999, 183.0]
Batf	Sox2	159	FALSE	(149.999, 183.0]
Stat5b	Klf1	159	FALSE	(149.999, 183.0]
Stat1	Mef2d	159	FALSE	(149.999, 183.0]
Ddit3	Ets1	159	FALSE	(149.999, 183.0]
Sox11	Nfia	159	FALSE	(149.999, 183.0]
Atf4	Egr2	159	TRUE	(149.999, 183.0]
Rara	Sox10	159	FALSE	(149.999, 183.0]
Nfe2	Bcl3	159	FALSE	(149.999, 183.0]
Sox2	Batf	159	FALSE	(149.999, 183.0]
Hlf	Ddit3	159	FALSE	(149.999, 183.0]
Tfe3	Bcl3	159	FALSE	(149.999, 183.0]
Hoxb5	Tcf12	159	FALSE	(149.999, 183.0]
Xbp1	Irf5	159	FALSE	(149.999, 183.0]
Stat3	Elf3	159	FALSE	(149.999, 183.0]
Trp53	Mafb	159	FALSE	(149.999, 183.0]
Irf3	Foxo1	159	FALSE	(149.999, 183.0]
Ddit3	Mef2a	159	FALSE	(149.999, 183.0]
Maff	Ctcf	159	FALSE	(149.999, 183.0]
Gfi1	Mef2a	159	FALSE	(149.999, 183.0]
Maff	Creb3	159	FALSE	(149.999, 183.0]
Mef2a	Gfi1	159	FALSE	(149.999, 183.0]
Ddit3	Hlf	159	FALSE	(149.999, 183.0]
Mafb	Trp53	159	FALSE	(149.999, 183.0]
Nfya	Xbp1	159	FALSE	(149.999, 183.0]
Mafb	Hdac2	159	FALSE	(149.999, 183.0]
Cebpa	Elf4	159	TRUE	(149.999, 183.0]
Mef2a	Ddit3	159	FALSE	(149.999, 183.0]
Nfia	Sox11	159	FALSE	(149.999, 183.0]
Fli1	Creb3	159	FALSE	(149.999, 183.0]
Fos	Elk3	159	FALSE	(149.999, 183.0]
Nfil3	Elf2	159	FALSE	(149.999, 183.0]
Xbp1	Nfya	159	FALSE	(149.999, 183.0]
Hnf1b	Nfyb	159	FALSE	(149.999, 183.0]
Rxrb	Pbx3	159	FALSE	(149.999, 183.0]
Cebpa	Tcf12	159	FALSE	(149.999, 183.0]
Pbx3	Rxrb	159	FALSE	(149.999, 183.0]
Elf3	Stat3	159	FALSE	(149.999, 183.0]
Bach1	Ddit3	159	FALSE	(149.999, 183.0]
Rxrb	Fosl2	159	FALSE	(149.999, 183.0]
Cebpa	Ehf	159	FALSE	(149.999, 183.0]
Irf2	Nfya	159	FALSE	(149.999, 183.0]
Hdac2	Mafb	159	FALSE	(149.999, 183.0]
Foxp2	Elf1	159	FALSE	(149.999, 183.0]
Elf4	Cebpa	159	TRUE	(149.999, 183.0]
Nfyb	Hnf1b	159	FALSE	(149.999, 183.0]
Gata3	Irf9	160	FALSE	(149.999, 183.0]
Gmeb2	Gata3	160	FALSE	(149.999, 183.0]
Gata3	Gmeb2	160	FALSE	(149.999, 183.0]
Yy1	Tfdp1	160	FALSE	(149.999, 183.0]
Usf2	Hdac2	160	FALSE	(149.999, 183.0]
Klf1	Srf	160	FALSE	(149.999, 183.0]
Lef1	Tfdp1	160	FALSE	(149.999, 183.0]
Hnf1b	Gli2	160	FALSE	(149.999, 183.0]
Tcf12	E2f2	160	FALSE	(149.999, 183.0]
Sp3	Foxa2	160	FALSE	(149.999, 183.0]
Mafg	Hoxc10	160	FALSE	(149.999, 183.0]
Nfil3	Atf7	160	FALSE	(149.999, 183.0]
Klf15	Foxk1	160	FALSE	(149.999, 183.0]
Gata6	Egr2	160	TRUE	(149.999, 183.0]
Gli1	Mef2d	160	FALSE	(149.999, 183.0]
Tead2	Pknox1	160	FALSE	(149.999, 183.0]
Nfya	Ets2	160	FALSE	(149.999, 183.0]
Atf7	Nfil3	160	FALSE	(149.999, 183.0]
Mafg	Hoxa9	160	FALSE	(149.999, 183.0]
Irf5	Egr1	160	FALSE	(149.999, 183.0]
Gli2	Hnf1b	160	FALSE	(149.999, 183.0]
Atf4	E2f2	160	FALSE	(149.999, 183.0]
Elk3	Ets2	160	TRUE	(149.999, 183.0]
Esrra	Mafk	160	FALSE	(149.999, 183.0]
Gli2	Tef	160	FALSE	(149.999, 183.0]
Rela	Mef2d	160	FALSE	(149.999, 183.0]
Ets2	Nfya	160	FALSE	(149.999, 183.0]
Tgif1	Nfatc2	160	TRUE	(149.999, 183.0]
Ctcf	Nr2f2	160	FALSE	(149.999, 183.0]
Gli1	Relb	160	FALSE	(149.999, 183.0]
Cebpa	Foxc1	160	FALSE	(149.999, 183.0]
Nfatc2	Tgif1	160	TRUE	(149.999, 183.0]
Mafb	Hoxa9	160	FALSE	(149.999, 183.0]
Mafb	Hoxc10	160	FALSE	(149.999, 183.0]
Elf4	Kdm5a	160	FALSE	(149.999, 183.0]
Hoxc10	Maff	160	FALSE	(149.999, 183.0]
Hoxc10	Mafg	160	FALSE	(149.999, 183.0]
Hoxc10	Mafb	160	FALSE	(149.999, 183.0]
Hoxc10	Mafk	160	FALSE	(149.999, 183.0]
Egr2	Rxra	160	FALSE	(149.999, 183.0]
Elf1	Rela	160	FALSE	(149.999, 183.0]
E2f7	Eomes	160	FALSE	(149.999, 183.0]
E2f7	Sp4	160	FALSE	(149.999, 183.0]
Egr2	Gata6	160	TRUE	(149.999, 183.0]
Relb	Gli1	160	FALSE	(149.999, 183.0]
Hdac2	Usf2	160	FALSE	(149.999, 183.0]
Tef	Gli2	160	FALSE	(149.999, 183.0]
Mef2a	E2f7	160	FALSE	(149.999, 183.0]
Rxra	Egr2	160	FALSE	(149.999, 183.0]
Rxra	Stat5a	160	FALSE	(149.999, 183.0]
Maff	Hoxc10	160	FALSE	(149.999, 183.0]
Foxa2	Sp3	160	FALSE	(149.999, 183.0]
Dbp	Kdm5a	160	FALSE	(149.999, 183.0]
Mafk	Esrra	160	FALSE	(149.999, 183.0]
Pknox1	Tead2	160	FALSE	(149.999, 183.0]
Mafk	Hoxc10	160	FALSE	(149.999, 183.0]
Hoxa9	Mafb	160	FALSE	(149.999, 183.0]
Eomes	E2f7	160	FALSE	(149.999, 183.0]
Nr2f2	Ctcf	160	FALSE	(149.999, 183.0]
Hoxa9	Jund	160	FALSE	(149.999, 183.0]
Jund	Hoxa9	160	FALSE	(149.999, 183.0]
Irf9	Spib	160	TRUE	(149.999, 183.0]
Ikzf1	Srf	160	FALSE	(149.999, 183.0]
Ets2	Elk3	160	TRUE	(149.999, 183.0]
Hoxa9	Mafg	160	FALSE	(149.999, 183.0]
Spib	Irf9	160	TRUE	(149.999, 183.0]
Irf9	Gata3	160	FALSE	(149.999, 183.0]
Sp4	E2f7	160	FALSE	(149.999, 183.0]
E2f7	Mef2a	160	FALSE	(149.999, 183.0]
E2f2	Tcf12	160	FALSE	(149.999, 183.0]
Egr1	Irf5	160	FALSE	(149.999, 183.0]
Mef2d	Rela	160	FALSE	(149.999, 183.0]
Foxk1	Klf15	160	FALSE	(149.999, 183.0]
Foxc1	Cebpa	160	FALSE	(149.999, 183.0]
E2f2	Atf4	160	FALSE	(149.999, 183.0]
Stat5a	Rxra	160	FALSE	(149.999, 183.0]
Elf1	Kdm5a	160	TRUE	(149.999, 183.0]
Srf	Klf1	160	FALSE	(149.999, 183.0]
Tfdp1	Lef1	160	FALSE	(149.999, 183.0]
Tfdp1	Yy1	160	FALSE	(149.999, 183.0]
Kdm5a	Dbp	160	FALSE	(149.999, 183.0]
Mef2d	Gli1	160	FALSE	(149.999, 183.0]
Kdm5a	Elf1	160	TRUE	(149.999, 183.0]
Kdm5a	Elf4	160	FALSE	(149.999, 183.0]
Rela	Elf1	160	FALSE	(149.999, 183.0]
Srf	Ikzf1	160	FALSE	(149.999, 183.0]
Ets2	Tfe3	161	FALSE	(149.999, 183.0]
Stat5b	Mafk	161	FALSE	(149.999, 183.0]
Sox11	Stat5b	161	FALSE	(149.999, 183.0]
Msx1	Foxp1	161	FALSE	(149.999, 183.0]
Tfe3	Ets2	161	FALSE	(149.999, 183.0]
Tef	Fosl1	161	FALSE	(149.999, 183.0]
Mecp2	Stat5a	161	FALSE	(149.999, 183.0]
Crem	Ets2	161	FALSE	(149.999, 183.0]
Yy1	Egr2	161	FALSE	(149.999, 183.0]
Atf3	Gfi1	161	FALSE	(149.999, 183.0]
Ep300	Hoxb2	161	FALSE	(149.999, 183.0]
Hoxb5	Gata3	161	FALSE	(149.999, 183.0]
Fosl2	Dbp	161	FALSE	(149.999, 183.0]
Klf5	Irf1	161	FALSE	(149.999, 183.0]
E2f2	Cebpe	161	TRUE	(149.999, 183.0]
Fosl1	Tef	161	FALSE	(149.999, 183.0]
Egr2	Yy1	161	FALSE	(149.999, 183.0]
Dbp	Fosl2	161	FALSE	(149.999, 183.0]
Fos	Tcf7l2	161	TRUE	(149.999, 183.0]
Esrra	Bcl3	161	FALSE	(149.999, 183.0]
Mafk	Stat5b	161	FALSE	(149.999, 183.0]
Gata3	Hoxb5	161	FALSE	(149.999, 183.0]
Cebpe	Nfia	161	FALSE	(149.999, 183.0]
Tead3	Klf5	161	FALSE	(149.999, 183.0]
Jund	Irf1	161	TRUE	(149.999, 183.0]
Patz1	Rel	161	FALSE	(149.999, 183.0]
Gata3	Mecp2	161	FALSE	(149.999, 183.0]
Foxp1	E2f7	161	FALSE	(149.999, 183.0]
Gfi1	Atf3	161	FALSE	(149.999, 183.0]
Rel	Patz1	161	FALSE	(149.999, 183.0]
Foxp1	Msx1	161	FALSE	(149.999, 183.0]
Bcl3	Esrra	161	FALSE	(149.999, 183.0]
Irf1	Klf5	161	FALSE	(149.999, 183.0]
Ets2	Crem	161	FALSE	(149.999, 183.0]
Hoxb2	Ep300	161	FALSE	(149.999, 183.0]
E2f7	Pparg	161	FALSE	(149.999, 183.0]
Gata6	Sp4	161	FALSE	(149.999, 183.0]
Sp4	Gata6	161	FALSE	(149.999, 183.0]
E2f7	Foxk1	161	FALSE	(149.999, 183.0]
Irf1	Jund	161	TRUE	(149.999, 183.0]
Irf1	Elk4	161	FALSE	(149.999, 183.0]
Stat5a	Mecp2	161	FALSE	(149.999, 183.0]
Foxk1	E2f7	161	FALSE	(149.999, 183.0]
Irf5	Mecp2	161	FALSE	(149.999, 183.0]
Pparg	E2f7	161	FALSE	(149.999, 183.0]
Tcf7l2	Fos	161	TRUE	(149.999, 183.0]
Mitf	Irf8	161	FALSE	(149.999, 183.0]
Taf7	Maff	161	FALSE	(149.999, 183.0]
Mecp2	Irf5	161	FALSE	(149.999, 183.0]
Cebpe	E2f2	161	TRUE	(149.999, 183.0]
Nfia	Cebpe	161	FALSE	(149.999, 183.0]
Irf8	Mitf	161	FALSE	(149.999, 183.0]
Klf5	Tead3	161	FALSE	(149.999, 183.0]
Maff	Taf7	161	FALSE	(149.999, 183.0]
E2f7	Foxp1	161	FALSE	(149.999, 183.0]
Elk4	Irf1	161	FALSE	(149.999, 183.0]
Mecp2	Gata3	161	FALSE	(149.999, 183.0]
Stat5b	Sox11	161	FALSE	(149.999, 183.0]
Elf1	Nr2c2	162	TRUE	(149.999, 183.0]
Ehf	Elk1	162	FALSE	(149.999, 183.0]
Fli1	Creb3l1	162	FALSE	(149.999, 183.0]
Elf1	Elk1	162	FALSE	(149.999, 183.0]
Jund	Tal1	162	FALSE	(149.999, 183.0]
Tcf7	Klf15	162	FALSE	(149.999, 183.0]
Foxp2	Ets2	162	FALSE	(149.999, 183.0]
Sox17	Klf15	162	FALSE	(149.999, 183.0]
Jund	Nfkb2	162	FALSE	(149.999, 183.0]
Elf2	Nr2c2	162	TRUE	(149.999, 183.0]
Tef	Rela	162	FALSE	(149.999, 183.0]
Tcf7	Rest	162	FALSE	(149.999, 183.0]
Yy1	Mitf	162	FALSE	(149.999, 183.0]
E2f6	Esrra	162	FALSE	(149.999, 183.0]
Xbp1	Hdac2	162	FALSE	(149.999, 183.0]
Hsf1	Fosl2	162	FALSE	(149.999, 183.0]
Sox17	Nfyb	162	FALSE	(149.999, 183.0]
Klf15	Atf4	162	FALSE	(149.999, 183.0]
Elk1	Elf2	162	FALSE	(149.999, 183.0]
Taf7	Rxra	162	FALSE	(149.999, 183.0]
Elk1	Elf1	162	FALSE	(149.999, 183.0]
Elk1	Elf4	162	FALSE	(149.999, 183.0]
Mitf	Yy1	162	FALSE	(149.999, 183.0]
Taf7	Tead4	162	TRUE	(149.999, 183.0]
Irf7	Etv3	162	TRUE	(149.999, 183.0]
Rara	Usf2	162	TRUE	(149.999, 183.0]
Ets2	Foxp2	162	FALSE	(149.999, 183.0]
Klf15	Sox17	162	FALSE	(149.999, 183.0]
Klf15	Tcf7	162	FALSE	(149.999, 183.0]
Klf15	Trp53	162	FALSE	(149.999, 183.0]
Nfil3	Msx1	162	FALSE	(149.999, 183.0]
Sox17	Hoxc6	162	FALSE	(149.999, 183.0]
Sp3	Nfat5	162	FALSE	(149.999, 183.0]
Ets2	Atf4	162	TRUE	(149.999, 183.0]
Xbp1	Lef1	162	FALSE	(149.999, 183.0]
Gata3	Usf2	162	FALSE	(149.999, 183.0]
Rest	Pml	162	TRUE	(149.999, 183.0]
Rest	Tcf7l2	162	FALSE	(149.999, 183.0]
Rest	Tcf7	162	FALSE	(149.999, 183.0]
Foxo1	Nfia	162	FALSE	(149.999, 183.0]
Tead4	Taf7	162	TRUE	(149.999, 183.0]
Msx1	Pparg	162	FALSE	(149.999, 183.0]
Msx1	Nfil3	162	FALSE	(149.999, 183.0]
Rxra	Taf7	162	FALSE	(149.999, 183.0]
Myc	Foxp2	162	FALSE	(149.999, 183.0]
Nfia	Foxo1	162	FALSE	(149.999, 183.0]
Klf1	Atf3	162	FALSE	(149.999, 183.0]
Hdac2	Xbp1	162	FALSE	(149.999, 183.0]
Pml	Rest	162	TRUE	(149.999, 183.0]
Elf2	Elk1	162	FALSE	(149.999, 183.0]
Elk1	Ehf	162	FALSE	(149.999, 183.0]
Nr2c2	Elf1	162	TRUE	(149.999, 183.0]
Usf2	Gata3	162	FALSE	(149.999, 183.0]
Irf1	Nfyb	162	FALSE	(149.999, 183.0]
Nr2c2	Elf2	162	TRUE	(149.999, 183.0]
Foxp2	Myc	162	FALSE	(149.999, 183.0]
Pparg	Msx1	162	FALSE	(149.999, 183.0]
Tcf7l2	Rest	162	FALSE	(149.999, 183.0]
Mxi1	Mef2a	162	FALSE	(149.999, 183.0]
Fosl2	Hsf1	162	FALSE	(149.999, 183.0]
Hoxc6	Sox17	162	FALSE	(149.999, 183.0]
Lef1	Xbp1	162	FALSE	(149.999, 183.0]
Creb3l1	Fli1	162	FALSE	(149.999, 183.0]
Mef2a	Mxi1	162	FALSE	(149.999, 183.0]
Usf2	Rara	162	TRUE	(149.999, 183.0]
Etv3	Irf7	162	TRUE	(149.999, 183.0]
Nfyb	Sox17	162	FALSE	(149.999, 183.0]
Nfkb2	Jund	162	FALSE	(149.999, 183.0]
Atf3	Klf1	162	FALSE	(149.999, 183.0]
Atf4	Klf15	162	FALSE	(149.999, 183.0]
Tal1	Jund	162	FALSE	(149.999, 183.0]
Atf4	Ets2	162	TRUE	(149.999, 183.0]
Trp53	Klf15	162	FALSE	(149.999, 183.0]
Rela	Tef	162	FALSE	(149.999, 183.0]
Nfat5	Sp3	162	FALSE	(149.999, 183.0]
Esrra	E2f6	162	FALSE	(149.999, 183.0]
Mef2d	Egr2	162	FALSE	(149.999, 183.0]
Elf4	Elk1	162	FALSE	(149.999, 183.0]
Egr2	Mef2d	162	FALSE	(149.999, 183.0]
Nfyb	Irf1	162	FALSE	(149.999, 183.0]
Tgif1	Bhlhe41	163	FALSE	(149.999, 183.0]
Jund	E2f6	163	FALSE	(149.999, 183.0]
Irf2	Klf16	163	FALSE	(149.999, 183.0]
Hoxb7	Foxo3	163	FALSE	(149.999, 183.0]
Irf2	Grhl1	163	FALSE	(149.999, 183.0]
Hnf1b	Rel	163	FALSE	(149.999, 183.0]
Tgif1	Cebpb	163	TRUE	(149.999, 183.0]
Elk3	Elf2	163	FALSE	(149.999, 183.0]
Tef	Mafg	163	FALSE	(149.999, 183.0]
Grhl1	Irf2	163	FALSE	(149.999, 183.0]
Rel	Hnf1b	163	FALSE	(149.999, 183.0]
Foxp1	Klf15	163	FALSE	(149.999, 183.0]
Klf1	Rxra	163	FALSE	(149.999, 183.0]
Nfya	Mitf	163	FALSE	(149.999, 183.0]
Mafk	Tef	163	FALSE	(149.999, 183.0]
Mafk	Hlf	163	FALSE	(149.999, 183.0]
Mafk	Dbp	163	FALSE	(149.999, 183.0]
Atf7	Egr1	163	FALSE	(149.999, 183.0]
Dbp	Mafg	163	FALSE	(149.999, 183.0]
Sp3	Stat5a	163	FALSE	(149.999, 183.0]
Junb	Foxo1	163	TRUE	(149.999, 183.0]
Dbp	Mafb	163	FALSE	(149.999, 183.0]
Dbp	Mafk	163	FALSE	(149.999, 183.0]
Maff	Tef	163	FALSE	(149.999, 183.0]
Elf3	Elk1	163	FALSE	(149.999, 183.0]
Foxo3	Hoxb7	163	FALSE	(149.999, 183.0]
Tgif1	Nr1h3	163	FALSE	(149.999, 183.0]
Maff	Arid3a	163	FALSE	(149.999, 183.0]
E2f6	Jund	163	FALSE	(149.999, 183.0]
Arid3a	Maff	163	FALSE	(149.999, 183.0]
Elk1	Cebpa	163	FALSE	(149.999, 183.0]
Hoxa5	Sox17	163	FALSE	(149.999, 183.0]
Ets2	Nfic	163	FALSE	(149.999, 183.0]
Mitf	Nfya	163	FALSE	(149.999, 183.0]
Bhlhe41	Tgif1	163	FALSE	(149.999, 183.0]
Hlf	Mafk	163	FALSE	(149.999, 183.0]
Nfic	Ets2	163	FALSE	(149.999, 183.0]
Hlf	Mafb	163	FALSE	(149.999, 183.0]
Klf16	Irf2	163	FALSE	(149.999, 183.0]
Tcf7l2	Rela	163	FALSE	(149.999, 183.0]
Cebpb	Tgif1	163	TRUE	(149.999, 183.0]
Cebpa	Elk1	163	FALSE	(149.999, 183.0]
Hlf	Mafg	163	FALSE	(149.999, 183.0]
Mafb	Ddit3	163	FALSE	(149.999, 183.0]
Hlf	Maff	163	FALSE	(149.999, 183.0]
Mafb	Dbp	163	FALSE	(149.999, 183.0]
Elk1	Elf3	163	FALSE	(149.999, 183.0]
Hoxb7	Foxo1	163	FALSE	(149.999, 183.0]
Egr1	Mitf	163	TRUE	(149.999, 183.0]
Cebpe	Maff	163	FALSE	(149.999, 183.0]
Maff	Hlf	163	FALSE	(149.999, 183.0]
Ets2	Xbp1	163	FALSE	(149.999, 183.0]
Atf4	Sox17	163	FALSE	(149.999, 183.0]
Sox17	Atf4	163	FALSE	(149.999, 183.0]
Maff	Cebpe	163	FALSE	(149.999, 183.0]
Irf3	Fosl1	163	FALSE	(149.999, 183.0]
Rela	Tcf7l2	163	FALSE	(149.999, 183.0]
Pknox1	Jun	163	FALSE	(149.999, 183.0]
Nr1h3	Tgif1	163	FALSE	(149.999, 183.0]
Ep300	Mafg	163	FALSE	(149.999, 183.0]
Rxra	Klf1	163	FALSE	(149.999, 183.0]
Nr1h3	Stat5b	163	FALSE	(149.999, 183.0]
Mitf	Egr1	163	TRUE	(149.999, 183.0]
Stat5a	Sp3	163	FALSE	(149.999, 183.0]
Nfia	Gli2	163	TRUE	(149.999, 183.0]
Klf15	Foxp1	163	FALSE	(149.999, 183.0]
Cebpe	Mafg	163	TRUE	(149.999, 183.0]
Egr1	Atf7	163	FALSE	(149.999, 183.0]
Sox17	Hoxa5	163	FALSE	(149.999, 183.0]
Mafb	Hlf	163	FALSE	(149.999, 183.0]
Mafg	Ep300	163	FALSE	(149.999, 183.0]
Mafg	Hlf	163	FALSE	(149.999, 183.0]
Fosb	Tcf7	163	FALSE	(149.999, 183.0]
Mafg	Cebpe	163	TRUE	(149.999, 183.0]
Mafg	Dbp	163	FALSE	(149.999, 183.0]
Jun	Pknox1	163	FALSE	(149.999, 183.0]
Ddit3	Mafb	163	FALSE	(149.999, 183.0]
Tcf7	Fosb	163	FALSE	(149.999, 183.0]
Xbp1	Ets2	163	FALSE	(149.999, 183.0]
Mafg	Tef	163	FALSE	(149.999, 183.0]
Fosl1	Irf3	163	FALSE	(149.999, 183.0]
Tef	Maff	163	FALSE	(149.999, 183.0]
Tef	Mafk	163	FALSE	(149.999, 183.0]
Gli2	Nfia	163	TRUE	(149.999, 183.0]
Foxo1	Hoxb7	163	FALSE	(149.999, 183.0]
Elf2	Elk3	163	FALSE	(149.999, 183.0]
Foxo1	Junb	163	TRUE	(149.999, 183.0]
Stat5b	Nr1h3	163	FALSE	(149.999, 183.0]
Dbp	Klf15	164	TRUE	(149.999, 183.0]
Pou2af1	Ets1	164	TRUE	(149.999, 183.0]
Junb	Hsf1	164	FALSE	(149.999, 183.0]
Nfatc2	Patz1	164	FALSE	(149.999, 183.0]
Ets1	Pou2af1	164	TRUE	(149.999, 183.0]
Snai3	Cebpa	164	FALSE	(149.999, 183.0]
Junb	Nfya	164	FALSE	(149.999, 183.0]
Nfat5	Dbp	164	FALSE	(149.999, 183.0]
Klf15	Dbp	164	TRUE	(149.999, 183.0]
Rxrb	Gtf2b	164	FALSE	(149.999, 183.0]
Ep300	Nfe2	164	FALSE	(149.999, 183.0]
Myc	Foxk1	164	FALSE	(149.999, 183.0]
Mafk	Hoxa9	164	FALSE	(149.999, 183.0]
Nfya	Pparg	164	FALSE	(149.999, 183.0]
Cebpe	Nfat5	164	FALSE	(149.999, 183.0]
Sox17	Tead2	164	TRUE	(149.999, 183.0]
Jun	Grhl1	164	TRUE	(149.999, 183.0]
Rxra	Nfil3	164	TRUE	(149.999, 183.0]
Pitx2	Yy1	164	FALSE	(149.999, 183.0]
Tfdp1	Sin3a	164	TRUE	(149.999, 183.0]
Tgif1	Stat1	164	FALSE	(149.999, 183.0]
Stat1	Tgif1	164	FALSE	(149.999, 183.0]
Yy1	Pitx2	164	FALSE	(149.999, 183.0]
Nfat5	Cebpe	164	FALSE	(149.999, 183.0]
Tcf7l2	Tef	164	FALSE	(149.999, 183.0]
Spib	Nfatc2	164	FALSE	(149.999, 183.0]
Pparg	Nfya	164	FALSE	(149.999, 183.0]
Foxp2	Esrra	164	FALSE	(149.999, 183.0]
Taf1	Nr2c2	164	TRUE	(149.999, 183.0]
Dbp	Nfat5	164	FALSE	(149.999, 183.0]
Nfil3	Rxra	164	TRUE	(149.999, 183.0]
Elf2	Foxk1	164	FALSE	(149.999, 183.0]
Tead2	Sox17	164	TRUE	(149.999, 183.0]
Nfya	Junb	164	FALSE	(149.999, 183.0]
Nfat5	Hlf	164	FALSE	(149.999, 183.0]
Foxk1	Foxc1	164	FALSE	(149.999, 183.0]
Foxk1	Myc	164	FALSE	(149.999, 183.0]
Foxk1	Atf7	164	FALSE	(149.999, 183.0]
Grhl1	Jun	164	TRUE	(149.999, 183.0]
Sin3a	Tfdp1	164	TRUE	(149.999, 183.0]
Cebpa	Foxp1	164	FALSE	(149.999, 183.0]
Mafb	Rarg	164	FALSE	(149.999, 183.0]
Atf7	Foxk1	164	FALSE	(149.999, 183.0]
Hoxa9	Mafk	164	FALSE	(149.999, 183.0]
Eomes	Tbx2	164	FALSE	(149.999, 183.0]
Foxk1	Elf2	164	FALSE	(149.999, 183.0]
Mafb	Myc	164	FALSE	(149.999, 183.0]
Foxp1	Cebpa	164	FALSE	(149.999, 183.0]
Myc	Mafb	164	FALSE	(149.999, 183.0]
Pml	Gli2	164	FALSE	(149.999, 183.0]
Gtf2b	Rxrb	164	FALSE	(149.999, 183.0]
Hsf1	Junb	164	FALSE	(149.999, 183.0]
Nr2f2	Fosl1	164	FALSE	(149.999, 183.0]
Cebpa	Snai3	164	FALSE	(149.999, 183.0]
Gli2	Pml	164	FALSE	(149.999, 183.0]
Rarg	Mafb	164	FALSE	(149.999, 183.0]
Tbx2	Eomes	164	FALSE	(149.999, 183.0]
Patz1	Nfatc2	164	FALSE	(149.999, 183.0]
Nr2c2	Taf1	164	TRUE	(149.999, 183.0]
Hoxa9	E2f4	164	FALSE	(149.999, 183.0]
Hdac2	Klf15	164	FALSE	(149.999, 183.0]
Klf15	Hdac2	164	FALSE	(149.999, 183.0]
Foxc1	Foxk1	164	FALSE	(149.999, 183.0]
Nfatc2	Spib	164	FALSE	(149.999, 183.0]
Hlf	Nfat5	164	FALSE	(149.999, 183.0]
Esrra	Foxp2	164	FALSE	(149.999, 183.0]
Fosl1	Nr2f2	164	FALSE	(149.999, 183.0]
Nfe2	Ep300	164	FALSE	(149.999, 183.0]
E2f4	Hoxa9	164	FALSE	(149.999, 183.0]
Tef	Tcf7l2	164	FALSE	(149.999, 183.0]
Foxp2	Elf3	165	FALSE	(149.999, 183.0]
Ctcf	Elf2	165	TRUE	(149.999, 183.0]
Ctcf	Fosl2	165	FALSE	(149.999, 183.0]
E2f6	Elf3	165	FALSE	(149.999, 183.0]
Atf4	Sp3	165	FALSE	(149.999, 183.0]
Fosl2	Runx3	165	FALSE	(149.999, 183.0]
Pknox1	Pparg	165	FALSE	(149.999, 183.0]
Bdp1	Trp53	165	FALSE	(149.999, 183.0]
Elf2	Xbp1	165	FALSE	(149.999, 183.0]
Rxrb	Ehf	165	FALSE	(149.999, 183.0]
E2f2	Foxo1	165	FALSE	(149.999, 183.0]
Rxra	Klf5	165	TRUE	(149.999, 183.0]
Foxp2	Stat6	165	FALSE	(149.999, 183.0]
Srebf1	E2f1	165	FALSE	(149.999, 183.0]
Ets1	Rest	165	FALSE	(149.999, 183.0]
Fosl1	Batf	165	FALSE	(149.999, 183.0]
Nfkb2	Ddit3	165	FALSE	(149.999, 183.0]
Fosb	Hoxb7	165	FALSE	(149.999, 183.0]
Lef1	Elf3	165	FALSE	(149.999, 183.0]
Nfe2	Foxa2	165	FALSE	(149.999, 183.0]
Gata6	Nfat5	165	FALSE	(149.999, 183.0]
Hcfc1	Gfi1	165	TRUE	(149.999, 183.0]
Spib	Patz1	165	FALSE	(149.999, 183.0]
Cebpe	Klf15	165	FALSE	(149.999, 183.0]
Tcf7l2	Setdb1	165	FALSE	(149.999, 183.0]
Ehf	Foxp2	165	FALSE	(149.999, 183.0]
Mafg	Rxrb	165	FALSE	(149.999, 183.0]
Nfat5	Gata6	165	FALSE	(149.999, 183.0]
Gfi1	Hcfc1	165	TRUE	(149.999, 183.0]
Ehf	Rxrb	165	FALSE	(149.999, 183.0]
Nr2c2	Usf2	165	FALSE	(149.999, 183.0]
Fosl2	Ctcf	165	FALSE	(149.999, 183.0]
Srebf1	Bhlhe41	165	TRUE	(149.999, 183.0]
Patz1	Spib	165	FALSE	(149.999, 183.0]
Mecp2	Stat1	165	FALSE	(149.999, 183.0]
Bhlhe41	Srebf1	165	TRUE	(149.999, 183.0]
Ehf	Xbp1	165	FALSE	(149.999, 183.0]
Irf5	Gfi1	165	FALSE	(149.999, 183.0]
Foxa2	Bach1	165	FALSE	(149.999, 183.0]
Xbp1	Elf2	165	FALSE	(149.999, 183.0]
Bcl3	E2f1	165	FALSE	(149.999, 183.0]
Esrra	Stat3	165	FALSE	(149.999, 183.0]
Elf4	Stat1	165	TRUE	(149.999, 183.0]
Junb	Xbp1	165	TRUE	(149.999, 183.0]
Hoxb7	Fosb	165	FALSE	(149.999, 183.0]
Rxrb	Maff	165	FALSE	(149.999, 183.0]
Elf3	E2f6	165	FALSE	(149.999, 183.0]
Ddit3	Nfkb2	165	FALSE	(149.999, 183.0]
Rest	Ets1	165	FALSE	(149.999, 183.0]
Hoxb5	Gfi1	165	FALSE	(149.999, 183.0]
Trp53	Bdp1	165	FALSE	(149.999, 183.0]
Setdb1	Tcf7l2	165	FALSE	(149.999, 183.0]
Elf2	Ctcf	165	TRUE	(149.999, 183.0]
Elk4	Snai3	165	FALSE	(149.999, 183.0]
Foxp1	Elf3	165	FALSE	(149.999, 183.0]
Batf	Fosl1	165	FALSE	(149.999, 183.0]
Gfi1	Hoxb5	165	FALSE	(149.999, 183.0]
E2f1	Pml	165	FALSE	(149.999, 183.0]
Foxa2	Nfe2	165	FALSE	(149.999, 183.0]
Rxrb	Mafg	165	FALSE	(149.999, 183.0]
Klf5	Rxra	165	TRUE	(149.999, 183.0]
Foxo1	E2f2	165	FALSE	(149.999, 183.0]
Xbp1	Junb	165	TRUE	(149.999, 183.0]
Gfi1	Irf5	165	FALSE	(149.999, 183.0]
Stat1	Mecp2	165	FALSE	(149.999, 183.0]
Pml	E2f1	165	FALSE	(149.999, 183.0]
E2f1	Bcl3	165	FALSE	(149.999, 183.0]
Pparg	Pknox1	165	FALSE	(149.999, 183.0]
Stat1	Elf4	165	TRUE	(149.999, 183.0]
Runx3	Fosl2	165	FALSE	(149.999, 183.0]
Xbp1	Ehf	165	FALSE	(149.999, 183.0]
Bach1	Foxa2	165	FALSE	(149.999, 183.0]
Usf2	Nr2c2	165	FALSE	(149.999, 183.0]
Snai3	Elk4	165	FALSE	(149.999, 183.0]
Stat6	Foxp2	165	FALSE	(149.999, 183.0]
Maff	Rxrb	165	FALSE	(149.999, 183.0]
Elf3	Lef1	165	FALSE	(149.999, 183.0]
Elf3	Foxp2	165	FALSE	(149.999, 183.0]
Elf3	Foxp1	165	FALSE	(149.999, 183.0]
Stat3	Esrra	165	FALSE	(149.999, 183.0]
Foxp2	Ehf	165	FALSE	(149.999, 183.0]
Xbp1	Elf1	165	FALSE	(149.999, 183.0]
Elf3	Xbp1	165	FALSE	(149.999, 183.0]
Sp3	Atf4	165	FALSE	(149.999, 183.0]
E2f1	Srebf1	165	FALSE	(149.999, 183.0]
Xbp1	Elf3	165	FALSE	(149.999, 183.0]
Elf1	Xbp1	165	FALSE	(149.999, 183.0]
Klf15	Cebpe	165	FALSE	(149.999, 183.0]
Spib	Hoxa9	166	FALSE	(149.999, 183.0]
Nr2c2	Atf7	166	FALSE	(149.999, 183.0]
Hoxb2	Sin3a	166	FALSE	(149.999, 183.0]
Rara	Tfe3	166	FALSE	(149.999, 183.0]
Foxp1	Irf8	166	TRUE	(149.999, 183.0]
E2f4	Gli1	166	FALSE	(149.999, 183.0]
Rarg	Kdm5a	166	FALSE	(149.999, 183.0]
Hoxa9	Spib	166	FALSE	(149.999, 183.0]
Nr2f2	Hoxa5	166	TRUE	(149.999, 183.0]
Stat3	Msx1	166	FALSE	(149.999, 183.0]
Stat6	E2f4	166	FALSE	(149.999, 183.0]
Fli1	Gata6	166	FALSE	(149.999, 183.0]
Klf16	Klf1	166	FALSE	(149.999, 183.0]
Foxk1	Foxo1	166	FALSE	(149.999, 183.0]
Nr2f2	Tcf7	166	FALSE	(149.999, 183.0]
Tal1	Fosl1	166	FALSE	(149.999, 183.0]
Msx1	Stat3	166	FALSE	(149.999, 183.0]
Etv3	Gata2	166	FALSE	(149.999, 183.0]
Pparg	Klf1	166	FALSE	(149.999, 183.0]
Mafb	Jund	166	FALSE	(149.999, 183.0]
Atf7	Nr2c2	166	FALSE	(149.999, 183.0]
Rarg	Sp3	166	FALSE	(149.999, 183.0]
Fos	Gli2	166	TRUE	(149.999, 183.0]
Pbx3	Eomes	166	FALSE	(149.999, 183.0]
Foxo3	Rest	166	FALSE	(149.999, 183.0]
Bcl3	Mef2d	166	FALSE	(149.999, 183.0]
Mef2d	Bcl3	166	FALSE	(149.999, 183.0]
E2f4	Stat6	166	FALSE	(149.999, 183.0]
Klf1	Pparg	166	FALSE	(149.999, 183.0]
Gata6	Fli1	166	FALSE	(149.999, 183.0]
Esrra	Atf4	166	FALSE	(149.999, 183.0]
Hoxa9	Gli1	166	TRUE	(149.999, 183.0]
Klf1	Klf16	166	FALSE	(149.999, 183.0]
Hoxa5	Nr2f2	166	TRUE	(149.999, 183.0]
Irf8	Foxp1	166	TRUE	(149.999, 183.0]
Foxo1	Foxk1	166	FALSE	(149.999, 183.0]
Gata2	Gli2	166	FALSE	(149.999, 183.0]
Gata2	Etv3	166	FALSE	(149.999, 183.0]
Tfdp1	Mxi1	166	FALSE	(149.999, 183.0]
Tfdp1	Nfat5	166	FALSE	(149.999, 183.0]
Gli1	Hoxa9	166	TRUE	(149.999, 183.0]
Eomes	Pbx3	166	FALSE	(149.999, 183.0]
Tal1	Gli1	166	FALSE	(149.999, 183.0]
Stat1	Mxi1	166	FALSE	(149.999, 183.0]
Rxra	Tbx2	166	FALSE	(149.999, 183.0]
Rest	Foxo3	166	FALSE	(149.999, 183.0]
Ddit3	Nfat5	166	TRUE	(149.999, 183.0]
Gfi1	Nfyb	166	TRUE	(149.999, 183.0]
Mxi1	Tfdp1	166	FALSE	(149.999, 183.0]
Sin3a	Hoxb2	166	FALSE	(149.999, 183.0]
Sp1	Bcl3	166	FALSE	(149.999, 183.0]
Fosl1	Tal1	166	FALSE	(149.999, 183.0]
Tfe3	Rara	166	FALSE	(149.999, 183.0]
Atf4	Esrra	166	FALSE	(149.999, 183.0]
Bcl3	Sp1	166	FALSE	(149.999, 183.0]
Hoxa9	Rela	166	FALSE	(149.999, 183.0]
Gli1	E2f4	166	FALSE	(149.999, 183.0]
Nfia	Stat5a	166	FALSE	(149.999, 183.0]
Mxi1	Stat1	166	FALSE	(149.999, 183.0]
Lef1	Klf15	166	FALSE	(149.999, 183.0]
Kdm5a	Rarg	166	FALSE	(149.999, 183.0]
Klf15	Lef1	166	FALSE	(149.999, 183.0]
Nfat5	Tfdp1	166	FALSE	(149.999, 183.0]
Gli2	Gata2	166	FALSE	(149.999, 183.0]
Stat5a	Nfia	166	FALSE	(149.999, 183.0]
Gli2	Fos	166	TRUE	(149.999, 183.0]
Tcf7	Nr2f2	166	FALSE	(149.999, 183.0]
Rela	Hoxa9	166	FALSE	(149.999, 183.0]
Nfat5	Ddit3	166	TRUE	(149.999, 183.0]
Gli1	Tal1	166	FALSE	(149.999, 183.0]
Sp3	Rarg	166	FALSE	(149.999, 183.0]
Jund	Mafb	166	FALSE	(149.999, 183.0]
Nfyb	Gfi1	166	TRUE	(149.999, 183.0]
Tbx2	Rxra	166	FALSE	(149.999, 183.0]
Esrra	Foxp1	167	FALSE	(149.999, 183.0]
Srf	Ppard	167	FALSE	(149.999, 183.0]
Sox11	Elf2	167	FALSE	(149.999, 183.0]
Hdac2	Srebf1	167	FALSE	(149.999, 183.0]
Rxra	Tef	167	TRUE	(149.999, 183.0]
Foxa2	E2f6	167	FALSE	(149.999, 183.0]
Crem	Elk1	167	FALSE	(149.999, 183.0]
Nfatc2	Tcf7l2	167	FALSE	(149.999, 183.0]
Bhlhe41	Egr1	167	FALSE	(149.999, 183.0]
Fosl2	Ikzf1	167	FALSE	(149.999, 183.0]
Sox10	Rest	167	FALSE	(149.999, 183.0]
Etv3	Esrra	167	FALSE	(149.999, 183.0]
Foxa2	Sin3a	167	FALSE	(149.999, 183.0]
Tef	Rxra	167	TRUE	(149.999, 183.0]
Nfyb	Srebf1	167	FALSE	(149.999, 183.0]
Stat3	Creb3	167	FALSE	(149.999, 183.0]
Elf4	Pparg	167	FALSE	(149.999, 183.0]
Tcf7	Mitf	167	FALSE	(149.999, 183.0]
Jund	Stat5b	167	FALSE	(149.999, 183.0]
Irf8	Crem	167	FALSE	(149.999, 183.0]
E2f7	Junb	167	FALSE	(149.999, 183.0]
Elf2	Sox11	167	FALSE	(149.999, 183.0]
Grhl1	Egr1	167	FALSE	(149.999, 183.0]
Rest	Sox10	167	FALSE	(149.999, 183.0]
Bhlhe41	Elk4	167	FALSE	(149.999, 183.0]
Crem	Irf8	167	FALSE	(149.999, 183.0]
Ikzf1	Fosl2	167	FALSE	(149.999, 183.0]
Eomes	Mecp2	167	FALSE	(149.999, 183.0]
Elk4	Bhlhe41	167	FALSE	(149.999, 183.0]
Ppard	Srf	167	FALSE	(149.999, 183.0]
Mafk	Egr2	167	TRUE	(149.999, 183.0]
Egr2	Mafk	167	TRUE	(149.999, 183.0]
Foxp1	Esrra	167	FALSE	(149.999, 183.0]
Sin3a	Foxa2	167	FALSE	(149.999, 183.0]
Egr1	Bhlhe41	167	FALSE	(149.999, 183.0]
Mitf	Tcf7	167	FALSE	(149.999, 183.0]
E2f6	Foxa2	167	FALSE	(149.999, 183.0]
Nfya	Elk3	167	FALSE	(149.999, 183.0]
Gabpa	Tfdp1	167	TRUE	(149.999, 183.0]
Usf1	Xbp1	167	FALSE	(149.999, 183.0]
Esrra	Etv3	167	FALSE	(149.999, 183.0]
Srebf1	Irf1	167	FALSE	(149.999, 183.0]
Elk1	Crem	167	FALSE	(149.999, 183.0]
Junb	E2f7	167	FALSE	(149.999, 183.0]
Tead4	Gli2	167	FALSE	(149.999, 183.0]
Srebf1	Hdac2	167	FALSE	(149.999, 183.0]
Elk3	Nfya	167	FALSE	(149.999, 183.0]
Srebf1	Nfyb	167	FALSE	(149.999, 183.0]
Egr1	Grhl1	167	FALSE	(149.999, 183.0]
Irf1	Srebf1	167	FALSE	(149.999, 183.0]
Pparg	Elf4	167	FALSE	(149.999, 183.0]
Creb3	Stat3	167	FALSE	(149.999, 183.0]
Mecp2	Eomes	167	FALSE	(149.999, 183.0]
Stat5b	Jund	167	FALSE	(149.999, 183.0]
Tcf7l2	Nfatc2	167	FALSE	(149.999, 183.0]
Tfdp1	Gabpa	167	TRUE	(149.999, 183.0]
Xbp1	Usf1	167	FALSE	(149.999, 183.0]
Gli2	Tead4	167	FALSE	(149.999, 183.0]
Gata6	Elf3	168	FALSE	(149.999, 183.0]
Rxra	Nfkb2	168	FALSE	(149.999, 183.0]
Pitx2	Fos	168	FALSE	(149.999, 183.0]
Srebf1	Ets1	168	FALSE	(149.999, 183.0]
Rest	Egr1	168	FALSE	(149.999, 183.0]
Tfdp1	Jun	168	FALSE	(149.999, 183.0]
Sin3a	Stat5b	168	FALSE	(149.999, 183.0]
Gabpa	Fosl2	168	FALSE	(149.999, 183.0]
Runx3	Mitf	168	FALSE	(149.999, 183.0]
E2f1	Elf1	168	FALSE	(149.999, 183.0]
Hsf1	Klf1	168	FALSE	(149.999, 183.0]
Mitf	Runx3	168	FALSE	(149.999, 183.0]
E2f6	Fosl2	168	FALSE	(149.999, 183.0]
Sox17	Pparg	168	TRUE	(149.999, 183.0]
Rxra	Sox10	168	FALSE	(149.999, 183.0]
Hcfc1	Mxi1	168	TRUE	(149.999, 183.0]
Pou2af1	Trp53	168	FALSE	(149.999, 183.0]
Stat1	Atf7	168	FALSE	(149.999, 183.0]
Mafb	Sox2	168	FALSE	(149.999, 183.0]
Elf3	Gata6	168	FALSE	(149.999, 183.0]
Elf1	E2f1	168	FALSE	(149.999, 183.0]
Stat5b	Sox10	168	FALSE	(149.999, 183.0]
Stat5b	Sin3a	168	FALSE	(149.999, 183.0]
Jun	Tfdp1	168	FALSE	(149.999, 183.0]
Tef	Atf3	168	FALSE	(149.999, 183.0]
Ets1	Srebf1	168	FALSE	(149.999, 183.0]
Nfya	E2f7	168	TRUE	(149.999, 183.0]
Klf5	Fli1	168	FALSE	(149.999, 183.0]
Trp53	Pou2af1	168	FALSE	(149.999, 183.0]
Srf	Atf7	168	FALSE	(149.999, 183.0]
Pparg	Sox17	168	TRUE	(149.999, 183.0]
Fli1	Klf5	168	FALSE	(149.999, 183.0]
Pparg	Atf7	168	FALSE	(149.999, 183.0]
Pml	Irf8	168	TRUE	(149.999, 183.0]
Atf7	Srf	168	FALSE	(149.999, 183.0]
Pparg	Tead4	168	FALSE	(149.999, 183.0]
Fos	Klf1	168	FALSE	(149.999, 183.0]
Klf1	Fos	168	FALSE	(149.999, 183.0]
Atf7	Pparg	168	FALSE	(149.999, 183.0]
Foxp1	Hoxb7	168	FALSE	(149.999, 183.0]
Hoxb7	Foxp1	168	FALSE	(149.999, 183.0]
Nfya	Ikzf1	168	FALSE	(149.999, 183.0]
Sox17	Usf1	168	FALSE	(149.999, 183.0]
Fos	Pitx2	168	FALSE	(149.999, 183.0]
Klf1	Hsf1	168	FALSE	(149.999, 183.0]
Atf7	Stat1	168	FALSE	(149.999, 183.0]
Tead4	Pparg	168	FALSE	(149.999, 183.0]
Atf3	Tef	168	FALSE	(149.999, 183.0]
Stat5a	Mitf	168	FALSE	(149.999, 183.0]
Ets2	Hoxc6	168	FALSE	(149.999, 183.0]
Mitf	Stat5a	168	FALSE	(149.999, 183.0]
Fosl2	Gabpa	168	FALSE	(149.999, 183.0]
Egr1	Rest	168	FALSE	(149.999, 183.0]
Mitf	Srebf1	168	FALSE	(149.999, 183.0]
Mxi1	Hcfc1	168	TRUE	(149.999, 183.0]
Irf8	Pml	168	TRUE	(149.999, 183.0]
E2f7	Nfya	168	TRUE	(149.999, 183.0]
Fosl2	E2f6	168	FALSE	(149.999, 183.0]
Sox10	Stat5b	168	FALSE	(149.999, 183.0]
Nfkb2	Rxra	168	FALSE	(149.999, 183.0]
Mef2d	Ikzf1	168	FALSE	(149.999, 183.0]
Srebf1	Mitf	168	FALSE	(149.999, 183.0]
Ikzf1	Nfya	168	FALSE	(149.999, 183.0]
Usf1	Sox17	168	FALSE	(149.999, 183.0]
Sox2	Mafb	168	FALSE	(149.999, 183.0]
Hoxc6	Ets2	168	FALSE	(149.999, 183.0]
Ikzf1	Mef2d	168	FALSE	(149.999, 183.0]
Sox10	Rxra	168	FALSE	(149.999, 183.0]
Nfyb	Junb	169	FALSE	(149.999, 183.0]
Stat3	Nfe2	169	FALSE	(149.999, 183.0]
Atf3	Tal1	169	FALSE	(149.999, 183.0]
Srebf1	Tead3	169	FALSE	(149.999, 183.0]
Foxp1	Tal1	169	FALSE	(149.999, 183.0]
Elk3	Nfyb	169	FALSE	(149.999, 183.0]
Cebpz	Nfya	169	FALSE	(149.999, 183.0]
Runx3	Atf3	169	FALSE	(149.999, 183.0]
Eomes	Sin3a	169	FALSE	(149.999, 183.0]
Nfya	Cebpz	169	FALSE	(149.999, 183.0]
Nfya	Fosl1	169	FALSE	(149.999, 183.0]
Atf3	Runx3	169	FALSE	(149.999, 183.0]
Nfya	Atf7	169	FALSE	(149.999, 183.0]
E2f7	Hoxa5	169	FALSE	(149.999, 183.0]
Nfya	Nr2f2	169	FALSE	(149.999, 183.0]
Fos	Creb3l1	169	TRUE	(149.999, 183.0]
Junb	Ppard	169	FALSE	(149.999, 183.0]
Gata6	Taf1	169	FALSE	(149.999, 183.0]
Rara	Ppard	169	FALSE	(149.999, 183.0]
Junb	Nfyb	169	FALSE	(149.999, 183.0]
Hoxa5	E2f7	169	FALSE	(149.999, 183.0]
Atf7	Nfya	169	FALSE	(149.999, 183.0]
Irf3	Ddit3	169	FALSE	(149.999, 183.0]
Tal1	Atf3	169	FALSE	(149.999, 183.0]
Klf16	Klf15	169	FALSE	(149.999, 183.0]
Eomes	Tead2	169	FALSE	(149.999, 183.0]
Ddit3	Irf3	169	FALSE	(149.999, 183.0]
Pparg	Patz1	169	FALSE	(149.999, 183.0]
Sin3a	Eomes	169	FALSE	(149.999, 183.0]
Sox17	Tbx2	169	FALSE	(149.999, 183.0]
Taf1	Gata6	169	FALSE	(149.999, 183.0]
Klf15	Klf16	169	FALSE	(149.999, 183.0]
Nfyb	Elk3	169	FALSE	(149.999, 183.0]
Elk4	Irf8	169	FALSE	(149.999, 183.0]
Tbx2	Sox17	169	FALSE	(149.999, 183.0]
Creb3l1	Fos	169	TRUE	(149.999, 183.0]
Tead2	Eomes	169	FALSE	(149.999, 183.0]
Irf8	Elk4	169	FALSE	(149.999, 183.0]
Ppard	Junb	169	FALSE	(149.999, 183.0]
Tcf7	Stat5b	169	TRUE	(149.999, 183.0]
Hoxa9	Stat1	169	FALSE	(149.999, 183.0]
Tead3	Srebf1	169	FALSE	(149.999, 183.0]
Fosl1	Nfya	169	FALSE	(149.999, 183.0]
Stat1	Maff	169	FALSE	(149.999, 183.0]
Nfe2	Stat3	169	FALSE	(149.999, 183.0]
Stat1	Hoxa9	169	FALSE	(149.999, 183.0]
Tal1	Foxp1	169	FALSE	(149.999, 183.0]
Maff	Stat1	169	FALSE	(149.999, 183.0]
Stat5b	Tcf7	169	TRUE	(149.999, 183.0]
Patz1	Pparg	169	FALSE	(149.999, 183.0]
Nr2f2	Nfya	169	FALSE	(149.999, 183.0]
Ppard	Rara	169	FALSE	(149.999, 183.0]
Rel	Nfil3	170	FALSE	(149.999, 183.0]
Rel	Mafk	170	FALSE	(149.999, 183.0]
Stat6	Ppard	170	FALSE	(149.999, 183.0]
Msx1	Foxp2	170	FALSE	(149.999, 183.0]
Stat5b	Tef	170	FALSE	(149.999, 183.0]
Tef	Stat5a	170	FALSE	(149.999, 183.0]
Hdac2	Bhlhe41	170	FALSE	(149.999, 183.0]
Cebpb	E2f2	170	FALSE	(149.999, 183.0]
Mef2d	Ppard	170	FALSE	(149.999, 183.0]
Stat5b	Atf7	170	FALSE	(149.999, 183.0]
Setdb1	Sp3	170	TRUE	(149.999, 183.0]
Eomes	Yy1	170	FALSE	(149.999, 183.0]
Ddit3	Taf1	170	FALSE	(149.999, 183.0]
Mecp2	Gfi1	170	FALSE	(149.999, 183.0]
Gfi1	Mecp2	170	FALSE	(149.999, 183.0]
Nfkb2	Foxo1	170	TRUE	(149.999, 183.0]
Gfi1	Nfkb2	170	FALSE	(149.999, 183.0]
Nfatc4	Stat6	170	FALSE	(149.999, 183.0]
Yy1	Eomes	170	FALSE	(149.999, 183.0]
Hdac2	Foxp2	170	TRUE	(149.999, 183.0]
Gli1	Rel	170	FALSE	(149.999, 183.0]
Foxp2	Msx1	170	FALSE	(149.999, 183.0]
Tcf7	E2f7	170	FALSE	(149.999, 183.0]
Nfkb2	Gfi1	170	FALSE	(149.999, 183.0]
Tcf7	Sox11	170	FALSE	(149.999, 183.0]
Foxp2	Tcf7	170	FALSE	(149.999, 183.0]
Stat6	Nfatc4	170	FALSE	(149.999, 183.0]
Tcf7	Foxp2	170	FALSE	(149.999, 183.0]
Foxo1	Nfkb2	170	TRUE	(149.999, 183.0]
Foxp2	Hdac2	170	TRUE	(149.999, 183.0]
Elf4	Stat3	170	FALSE	(149.999, 183.0]
Foxa2	Gtf2b	170	FALSE	(149.999, 183.0]
E2f6	Egr2	170	FALSE	(149.999, 183.0]
Taf1	Ddit3	170	FALSE	(149.999, 183.0]
Nfil3	Rel	170	FALSE	(149.999, 183.0]
Egr2	E2f6	170	FALSE	(149.999, 183.0]
Stat3	Elf4	170	FALSE	(149.999, 183.0]
Hoxb2	Egr1	170	TRUE	(149.999, 183.0]
Klf15	Stat5a	170	FALSE	(149.999, 183.0]
Stat5a	Klf15	170	FALSE	(149.999, 183.0]
Nfia	Usf1	170	FALSE	(149.999, 183.0]
Sox11	Tcf7	170	FALSE	(149.999, 183.0]
Sox11	Stat1	170	FALSE	(149.999, 183.0]
Egr1	Hoxb2	170	TRUE	(149.999, 183.0]
Ppard	Mef2d	170	FALSE	(149.999, 183.0]
Stat1	Sox11	170	FALSE	(149.999, 183.0]
Stat5a	Atf7	170	FALSE	(149.999, 183.0]
Sin3a	Hoxb5	170	FALSE	(149.999, 183.0]
Sp3	Setdb1	170	TRUE	(149.999, 183.0]
Ppard	Stat6	170	FALSE	(149.999, 183.0]
Usf1	Nfia	170	FALSE	(149.999, 183.0]
Atf7	Stat5a	170	FALSE	(149.999, 183.0]
Bhlhe41	Hdac2	170	FALSE	(149.999, 183.0]
Atf7	Stat5b	170	FALSE	(149.999, 183.0]
Mafk	Rel	170	FALSE	(149.999, 183.0]
Hoxb5	Sin3a	170	FALSE	(149.999, 183.0]
Stat5a	Tef	170	FALSE	(149.999, 183.0]
E2f2	Cebpb	170	FALSE	(149.999, 183.0]
Rel	Gli1	170	FALSE	(149.999, 183.0]
Tef	Stat5b	170	FALSE	(149.999, 183.0]
Gtf2b	Foxa2	170	FALSE	(149.999, 183.0]
E2f7	Tcf7	170	FALSE	(149.999, 183.0]
Tcf7	Sox10	171	FALSE	(149.999, 183.0]
Sin3a	Hoxa5	171	FALSE	(149.999, 183.0]
Rxra	Atf4	171	FALSE	(149.999, 183.0]
Ets1	Nfat5	171	FALSE	(149.999, 183.0]
E2f2	Foxp1	171	FALSE	(149.999, 183.0]
Mecp2	Foxo3	171	FALSE	(149.999, 183.0]
Mecp2	Srf	171	FALSE	(149.999, 183.0]
Hoxc6	Sox10	171	FALSE	(149.999, 183.0]
Fosl2	Mecp2	171	FALSE	(149.999, 183.0]
Mafg	Tal1	171	FALSE	(149.999, 183.0]
E2f6	Stat3	171	FALSE	(149.999, 183.0]
Crem	Mef2d	171	FALSE	(149.999, 183.0]
Mafg	Ctcf	171	FALSE	(149.999, 183.0]
Sox10	Hoxc6	171	FALSE	(149.999, 183.0]
Nfat5	Ets1	171	FALSE	(149.999, 183.0]
Stat3	E2f6	171	FALSE	(149.999, 183.0]
Gmeb2	Nfatc4	171	FALSE	(149.999, 183.0]
Sox10	Tcf7	171	FALSE	(149.999, 183.0]
Mef2d	Rel	171	FALSE	(149.999, 183.0]
Tal1	Mafg	171	FALSE	(149.999, 183.0]
E2f7	Lef1	171	FALSE	(149.999, 183.0]
Msx1	Taf1	171	FALSE	(149.999, 183.0]
Usf1	Nfil3	171	FALSE	(149.999, 183.0]
Nfic	Sox2	171	FALSE	(149.999, 183.0]
Lef1	E2f7	171	FALSE	(149.999, 183.0]
Gli1	Ets2	171	FALSE	(149.999, 183.0]
Mef2d	Crem	171	FALSE	(149.999, 183.0]
Gtf2b	Gata2	171	FALSE	(149.999, 183.0]
Foxo3	Mecp2	171	FALSE	(149.999, 183.0]
Fos	Bhlhe41	171	FALSE	(149.999, 183.0]
Foxp1	E2f2	171	FALSE	(149.999, 183.0]
Yy1	Fosb	171	FALSE	(149.999, 183.0]
Nfil3	Usf1	171	FALSE	(149.999, 183.0]
Mecp2	Fosl2	171	FALSE	(149.999, 183.0]
Foxo1	Hoxb5	171	FALSE	(149.999, 183.0]
Gmeb1	Nfatc4	171	FALSE	(149.999, 183.0]
Elk4	Relb	171	FALSE	(149.999, 183.0]
Rest	Gata3	171	FALSE	(149.999, 183.0]
Hoxa5	Sin3a	171	FALSE	(149.999, 183.0]
Srebf1	Nfatc4	171	FALSE	(149.999, 183.0]
Tgif1	Sox2	171	FALSE	(149.999, 183.0]
Nfatc4	Gmeb2	171	FALSE	(149.999, 183.0]
Rel	Mef2d	171	FALSE	(149.999, 183.0]
Bhlhe41	Fosl1	171	FALSE	(149.999, 183.0]
Taf1	Msx1	171	FALSE	(149.999, 183.0]
Ctcf	Mafg	171	FALSE	(149.999, 183.0]
Klf5	Nr2c2	171	FALSE	(149.999, 183.0]
Creb3	Cebpz	171	FALSE	(149.999, 183.0]
Nfatc4	Srebf1	171	FALSE	(149.999, 183.0]
Mitf	Mxi1	171	FALSE	(149.999, 183.0]
Cebpz	Creb3	171	FALSE	(149.999, 183.0]
Fosl1	Bhlhe41	171	FALSE	(149.999, 183.0]
Atf4	E2f1	171	FALSE	(149.999, 183.0]
Gata2	Gtf2b	171	FALSE	(149.999, 183.0]
Etv3	Foxp2	171	FALSE	(149.999, 183.0]
E2f4	Gata6	171	FALSE	(149.999, 183.0]
Nfatc4	Gmeb1	171	FALSE	(149.999, 183.0]
Gata3	Gabpa	171	FALSE	(149.999, 183.0]
E2f1	Atf4	171	FALSE	(149.999, 183.0]
Gata6	E2f4	171	FALSE	(149.999, 183.0]
Cebpz	Foxp2	171	FALSE	(149.999, 183.0]
Foxp2	Etv3	171	FALSE	(149.999, 183.0]
Gata3	Rest	171	FALSE	(149.999, 183.0]
Srf	Mecp2	171	FALSE	(149.999, 183.0]
Hoxb5	Foxo1	171	FALSE	(149.999, 183.0]
Mxi1	Mitf	171	FALSE	(149.999, 183.0]
Bhlhe41	Klf15	171	FALSE	(149.999, 183.0]
Bhlhe41	Fos	171	FALSE	(149.999, 183.0]
Nr2c2	Klf5	171	FALSE	(149.999, 183.0]
Sox2	Tgif1	171	FALSE	(149.999, 183.0]
Atf4	Rxra	171	FALSE	(149.999, 183.0]
Ets2	Sox17	171	TRUE	(149.999, 183.0]
Irf1	Nr1h3	171	FALSE	(149.999, 183.0]
Sox2	Nfic	171	FALSE	(149.999, 183.0]
Sox17	Ets2	171	TRUE	(149.999, 183.0]
Klf15	Bhlhe41	171	FALSE	(149.999, 183.0]
Gabpa	Gata3	171	FALSE	(149.999, 183.0]
Nr1h3	Irf1	171	FALSE	(149.999, 183.0]
Foxp2	Cebpz	171	FALSE	(149.999, 183.0]
Jund	Mxi1	171	FALSE	(149.999, 183.0]
Ets2	Gli1	171	FALSE	(149.999, 183.0]
Mxi1	Jund	171	FALSE	(149.999, 183.0]
Relb	Elk4	171	FALSE	(149.999, 183.0]
Fosb	Yy1	171	FALSE	(149.999, 183.0]
Nfil3	Pbx3	172	FALSE	(149.999, 183.0]
Ets1	Setdb1	172	FALSE	(149.999, 183.0]
Atf3	Gtf2b	172	FALSE	(149.999, 183.0]
Nfic	Lef1	172	FALSE	(149.999, 183.0]
Elk1	Ppard	172	FALSE	(149.999, 183.0]
Gata6	Rel	172	FALSE	(149.999, 183.0]
Klf15	Tfe3	172	FALSE	(149.999, 183.0]
Junb	Foxa2	172	FALSE	(149.999, 183.0]
Hdac2	Elk1	172	FALSE	(149.999, 183.0]
Rel	Gata6	172	FALSE	(149.999, 183.0]
Relb	E2f1	172	FALSE	(149.999, 183.0]
Setdb1	Ets1	172	FALSE	(149.999, 183.0]
Mafk	Egr1	172	TRUE	(149.999, 183.0]
Tead4	E2f7	172	FALSE	(149.999, 183.0]
Pml	Kdm5a	172	TRUE	(149.999, 183.0]
Foxa2	Junb	172	FALSE	(149.999, 183.0]
Tead3	E2f7	172	FALSE	(149.999, 183.0]
Mef2a	Tcf7	172	FALSE	(149.999, 183.0]
Tead4	Trp53	172	FALSE	(149.999, 183.0]
Elk1	Egr1	172	FALSE	(149.999, 183.0]
Atf3	Sp1	172	FALSE	(149.999, 183.0]
Elf4	Eomes	172	FALSE	(149.999, 183.0]
Bhlhe41	Jun	172	FALSE	(149.999, 183.0]
Junb	Ikzf1	172	FALSE	(149.999, 183.0]
Hoxa9	Elf2	172	FALSE	(149.999, 183.0]
E2f1	Relb	172	FALSE	(149.999, 183.0]
Sp1	Atf3	172	FALSE	(149.999, 183.0]
Fosb	Hsf1	172	FALSE	(149.999, 183.0]
Eomes	Elf4	172	FALSE	(149.999, 183.0]
Mafk	Gata3	172	FALSE	(149.999, 183.0]
Taf7	Tal1	172	TRUE	(149.999, 183.0]
Nfyb	Bdp1	172	FALSE	(149.999, 183.0]
Ppard	Elk1	172	FALSE	(149.999, 183.0]
Tcf12	Nfia	172	FALSE	(149.999, 183.0]
Tcf7	Mef2a	172	FALSE	(149.999, 183.0]
Ep300	Tbx2	172	FALSE	(149.999, 183.0]
Mitf	Nfia	172	TRUE	(149.999, 183.0]
E2f7	Tead4	172	FALSE	(149.999, 183.0]
Lef1	Nfic	172	FALSE	(149.999, 183.0]
Ikzf1	Junb	172	FALSE	(149.999, 183.0]
Tbx2	Ep300	172	FALSE	(149.999, 183.0]
Gli2	Bcl3	172	FALSE	(149.999, 183.0]
Bcl3	Gli2	172	FALSE	(149.999, 183.0]
Tfe3	Klf15	172	FALSE	(149.999, 183.0]
Ctcf	Nr1h3	172	FALSE	(149.999, 183.0]
Jun	Bhlhe41	172	FALSE	(149.999, 183.0]
Kdm5a	Pml	172	TRUE	(149.999, 183.0]
Bdp1	Nfyb	172	FALSE	(149.999, 183.0]
E2f7	Tead3	172	FALSE	(149.999, 183.0]
Elk1	Hdac2	172	FALSE	(149.999, 183.0]
Gtf2b	Atf3	172	FALSE	(149.999, 183.0]
Pbx3	Nfil3	172	FALSE	(149.999, 183.0]
Nfia	Tcf12	172	FALSE	(149.999, 183.0]
Tal1	Taf7	172	TRUE	(149.999, 183.0]
Egr1	Mafk	172	TRUE	(149.999, 183.0]
Egr1	Elk1	172	FALSE	(149.999, 183.0]
Elf2	Hoxa9	172	FALSE	(149.999, 183.0]
Nr1h3	Ctcf	172	FALSE	(149.999, 183.0]
Gata3	Mafk	172	FALSE	(149.999, 183.0]
Hsf1	Fosb	172	FALSE	(149.999, 183.0]
Trp53	Tead4	172	FALSE	(149.999, 183.0]
Nfia	Mitf	172	TRUE	(149.999, 183.0]
Nfic	Cebpz	173	FALSE	(149.999, 183.0]
Usf1	Tef	173	FALSE	(149.999, 183.0]
Rxrb	Pml	173	FALSE	(149.999, 183.0]
Sp4	Tcf7l2	173	FALSE	(149.999, 183.0]
Rara	Nr2f6	173	FALSE	(149.999, 183.0]
Nfyb	Pparg	173	FALSE	(149.999, 183.0]
Klf16	Rara	173	FALSE	(149.999, 183.0]
Tbx2	Hdac2	173	FALSE	(149.999, 183.0]
Runx3	Pou2af1	173	TRUE	(149.999, 183.0]
Rara	Klf16	173	FALSE	(149.999, 183.0]
Fos	Etv3	173	FALSE	(149.999, 183.0]
Usf2	Elk1	173	FALSE	(149.999, 183.0]
Elk1	Usf2	173	FALSE	(149.999, 183.0]
Tcf7l2	Sp4	173	FALSE	(149.999, 183.0]
Pou2af1	Runx3	173	TRUE	(149.999, 183.0]
Rarg	Stat5a	173	FALSE	(149.999, 183.0]
Sox10	Foxo1	173	FALSE	(149.999, 183.0]
Cebpz	Nfic	173	FALSE	(149.999, 183.0]
Fosb	Stat5a	173	FALSE	(149.999, 183.0]
Pml	Tcf7l2	173	FALSE	(149.999, 183.0]
Gli2	Setdb1	173	FALSE	(149.999, 183.0]
Tef	Usf1	173	FALSE	(149.999, 183.0]
Pml	Rxrb	173	FALSE	(149.999, 183.0]
Ets1	Hdac2	173	FALSE	(149.999, 183.0]
Stat5a	Rarg	173	FALSE	(149.999, 183.0]
Etv3	Fos	173	FALSE	(149.999, 183.0]
Hdac2	Ets1	173	FALSE	(149.999, 183.0]
Stat5a	Fosb	173	FALSE	(149.999, 183.0]
Foxo1	Sox10	173	FALSE	(149.999, 183.0]
Gabpa	Fosl1	173	FALSE	(149.999, 183.0]
Hdac2	Tbx2	173	FALSE	(149.999, 183.0]
Fosl1	Gabpa	173	FALSE	(149.999, 183.0]
Nr2f6	Rara	173	FALSE	(149.999, 183.0]
Tcf7l2	Pml	173	FALSE	(149.999, 183.0]
Pparg	Nfyb	173	FALSE	(149.999, 183.0]
Setdb1	Gli2	173	FALSE	(149.999, 183.0]
Fosl2	Sin3a	174	FALSE	(149.999, 183.0]
Rest	Nfic	174	FALSE	(149.999, 183.0]
Rara	Foxp1	174	FALSE	(149.999, 183.0]
Irf5	Myc	174	FALSE	(149.999, 183.0]
Gli1	Setdb1	174	FALSE	(149.999, 183.0]
Stat5a	Foxa2	174	FALSE	(149.999, 183.0]
Mafk	Mef2a	174	TRUE	(149.999, 183.0]
Crem	Ikzf1	174	FALSE	(149.999, 183.0]
Sin3a	Fosl2	174	FALSE	(149.999, 183.0]
Rxra	Irf8	174	FALSE	(149.999, 183.0]
Nr3c1	Irf2	174	TRUE	(149.999, 183.0]
Sox10	Tead2	174	FALSE	(149.999, 183.0]
Mef2d	Sox2	174	FALSE	(149.999, 183.0]
Stat1	Klf1	174	FALSE	(149.999, 183.0]
Irf9	Pparg	174	FALSE	(149.999, 183.0]
Hoxb2	Foxp1	174	FALSE	(149.999, 183.0]
Tgif1	Hdac2	174	FALSE	(149.999, 183.0]
Irf9	Nr3c1	174	FALSE	(149.999, 183.0]
Myc	Irf5	174	FALSE	(149.999, 183.0]
Pitx2	Hnf1b	174	FALSE	(149.999, 183.0]
Nr2f6	Esrra	174	TRUE	(149.999, 183.0]
Sox2	Mef2d	174	FALSE	(149.999, 183.0]
Nr3c1	Irf9	174	FALSE	(149.999, 183.0]
Irf2	Nr3c1	174	TRUE	(149.999, 183.0]
Egr1	Rxrb	174	FALSE	(149.999, 183.0]
Ets2	Elk4	174	FALSE	(149.999, 183.0]
Pparg	Tal1	174	FALSE	(149.999, 183.0]
Tal1	Pparg	174	FALSE	(149.999, 183.0]
Foxp1	Hoxb2	174	FALSE	(149.999, 183.0]
Mef2a	Gli2	174	FALSE	(149.999, 183.0]
Foxo1	E2f4	174	FALSE	(149.999, 183.0]
Batf	Srf	174	FALSE	(149.999, 183.0]
Fosl2	Foxo3	174	FALSE	(149.999, 183.0]
Trp53	Hoxb5	174	FALSE	(149.999, 183.0]
Trp53	Elf3	174	FALSE	(149.999, 183.0]
Elk4	Ets2	174	FALSE	(149.999, 183.0]
Tead2	Sox10	174	FALSE	(149.999, 183.0]
Ets1	Arid3a	174	FALSE	(149.999, 183.0]
Gli2	Mef2a	174	FALSE	(149.999, 183.0]
E2f4	Foxo1	174	FALSE	(149.999, 183.0]
Foxo3	Fosl2	174	FALSE	(149.999, 183.0]
Pou2af1	Jun	174	FALSE	(149.999, 183.0]
Jun	Pou2af1	174	FALSE	(149.999, 183.0]
Nfe2	Hnf1b	174	FALSE	(149.999, 183.0]
Hdac2	Tgif1	174	FALSE	(149.999, 183.0]
Setdb1	Gli1	174	FALSE	(149.999, 183.0]
Tcf12	Foxo3	174	FALSE	(149.999, 183.0]
Tef	Yy1	174	FALSE	(149.999, 183.0]
Yy1	Tef	174	FALSE	(149.999, 183.0]
Arid3a	Ets1	174	FALSE	(149.999, 183.0]
Foxc1	Hoxb5	174	FALSE	(149.999, 183.0]
Foxc1	Nfyb	174	FALSE	(149.999, 183.0]
Srf	Batf	174	FALSE	(149.999, 183.0]
Esrra	Nr2f6	174	TRUE	(149.999, 183.0]
Elf1	Cebpb	174	FALSE	(149.999, 183.0]
Tcf12	Klf1	174	FALSE	(149.999, 183.0]
Hoxb5	Trp53	174	FALSE	(149.999, 183.0]
Klf1	Tcf12	174	FALSE	(149.999, 183.0]
Foxp1	Rara	174	FALSE	(149.999, 183.0]
Elf3	Trp53	174	FALSE	(149.999, 183.0]
Gli1	Ets1	174	FALSE	(149.999, 183.0]
Nfyb	Foxc1	174	FALSE	(149.999, 183.0]
Fos	Klf15	174	FALSE	(149.999, 183.0]
Irf8	Rxra	174	FALSE	(149.999, 183.0]
Pparg	Irf9	174	FALSE	(149.999, 183.0]
Rxrb	Egr1	174	FALSE	(149.999, 183.0]
Fosb	Irf1	174	FALSE	(149.999, 183.0]
Foxo3	Tcf12	174	FALSE	(149.999, 183.0]
Klf15	Fos	174	FALSE	(149.999, 183.0]
Klf1	Stat1	174	FALSE	(149.999, 183.0]
Ikzf1	Crem	174	FALSE	(149.999, 183.0]
Rxra	Sox2	174	FALSE	(149.999, 183.0]
Ets1	Gli1	174	FALSE	(149.999, 183.0]
Irf1	Fosb	174	FALSE	(149.999, 183.0]
Hoxb5	Foxc1	174	FALSE	(149.999, 183.0]
Nfic	Rest	174	FALSE	(149.999, 183.0]
Hnf1b	Nfe2	174	FALSE	(149.999, 183.0]
Cebpb	Elf1	174	FALSE	(149.999, 183.0]
Sp3	Atf3	174	FALSE	(149.999, 183.0]
Hnf1b	Pitx2	174	FALSE	(149.999, 183.0]
Mef2a	Mafk	174	TRUE	(149.999, 183.0]
Foxa2	Stat5a	174	FALSE	(149.999, 183.0]
Sox2	Rxra	174	FALSE	(149.999, 183.0]
Atf3	Sp3	174	FALSE	(149.999, 183.0]
Mxi1	Tcf12	175	FALSE	(149.999, 183.0]
Cebpa	Irf5	175	TRUE	(149.999, 183.0]
Hdac2	Cebpz	175	FALSE	(149.999, 183.0]
Ikzf1	Pparg	175	FALSE	(149.999, 183.0]
Rxra	Tal1	175	FALSE	(149.999, 183.0]
Rarg	E2f4	175	FALSE	(149.999, 183.0]
Myc	Klf16	175	TRUE	(149.999, 183.0]
Sox2	Gabpa	175	FALSE	(149.999, 183.0]
Nfic	Fosl1	175	FALSE	(149.999, 183.0]
Tal1	Rxra	175	FALSE	(149.999, 183.0]
Sox10	Fosl1	175	FALSE	(149.999, 183.0]
Hcfc1	Sp4	175	FALSE	(149.999, 183.0]
E2f4	Rarg	175	FALSE	(149.999, 183.0]
Hoxc6	Nr2f2	175	FALSE	(149.999, 183.0]
Sp4	Hcfc1	175	FALSE	(149.999, 183.0]
Sox10	Klf1	175	FALSE	(149.999, 183.0]
Yy1	Ppard	175	FALSE	(149.999, 183.0]
Irf5	Cebpa	175	TRUE	(149.999, 183.0]
Nr2c2	Bcl3	175	FALSE	(149.999, 183.0]
Rxrb	Yy1	175	FALSE	(149.999, 183.0]
Pparg	Ikzf1	175	FALSE	(149.999, 183.0]
Gata2	Irf1	175	TRUE	(149.999, 183.0]
Tead4	Ets1	175	FALSE	(149.999, 183.0]
Nr2f2	Sp1	175	FALSE	(149.999, 183.0]
Mafk	Taf7	175	FALSE	(149.999, 183.0]
Cebpz	Hdac2	175	FALSE	(149.999, 183.0]
Atf7	Ddit3	175	FALSE	(149.999, 183.0]
Yy1	Rxrb	175	FALSE	(149.999, 183.0]
Atf3	Eomes	175	FALSE	(149.999, 183.0]
Klf1	Sox10	175	FALSE	(149.999, 183.0]
Gmeb1	Tead4	175	FALSE	(149.999, 183.0]
Nfatc4	Pparg	175	FALSE	(149.999, 183.0]
Tcf12	Mxi1	175	FALSE	(149.999, 183.0]
Fosl1	Sox10	175	FALSE	(149.999, 183.0]
Tead4	Gmeb1	175	FALSE	(149.999, 183.0]
Pml	Irf9	175	TRUE	(149.999, 183.0]
Nfatc4	Stat5b	175	FALSE	(149.999, 183.0]
Ets1	Tead4	175	FALSE	(149.999, 183.0]
Klf5	Atf7	175	FALSE	(149.999, 183.0]
Atf7	Klf5	175	FALSE	(149.999, 183.0]
Foxo1	Foxc1	175	TRUE	(149.999, 183.0]
Atf3	Tcf12	175	FALSE	(149.999, 183.0]
Ddit3	Atf7	175	FALSE	(149.999, 183.0]
Batf	Bhlhe41	175	FALSE	(149.999, 183.0]
Eomes	Atf3	175	FALSE	(149.999, 183.0]
Irf1	Gata2	175	TRUE	(149.999, 183.0]
Klf16	Myc	175	TRUE	(149.999, 183.0]
Bcl3	Nr2c2	175	FALSE	(149.999, 183.0]
Nr2f2	Hoxc6	175	FALSE	(149.999, 183.0]
Taf1	Maff	175	FALSE	(149.999, 183.0]
Irf9	Pml	175	TRUE	(149.999, 183.0]
Ppard	Yy1	175	FALSE	(149.999, 183.0]
Tcf12	Atf3	175	FALSE	(149.999, 183.0]
Sp1	Nr2f2	175	FALSE	(149.999, 183.0]
Fosl1	Nfic	175	FALSE	(149.999, 183.0]
Tcf12	Hoxa9	175	FALSE	(149.999, 183.0]
Eomes	Hoxa9	175	FALSE	(149.999, 183.0]
Foxc1	Foxo1	175	TRUE	(149.999, 183.0]
Hoxa9	Tcf12	175	FALSE	(149.999, 183.0]
Bhlhe41	Batf	175	FALSE	(149.999, 183.0]
Bhlhe41	E2f6	175	FALSE	(149.999, 183.0]
Pparg	Nfatc4	175	FALSE	(149.999, 183.0]
Gabpa	Sox2	175	FALSE	(149.999, 183.0]
Maff	Taf1	175	FALSE	(149.999, 183.0]
Stat5b	Nfatc4	175	FALSE	(149.999, 183.0]
Hoxa9	Eomes	175	FALSE	(149.999, 183.0]
Taf7	Mafk	175	FALSE	(149.999, 183.0]
E2f6	Bhlhe41	175	FALSE	(149.999, 183.0]
Nfatc2	Nr3c1	176	FALSE	(149.999, 183.0]
Tcf12	Irf8	176	FALSE	(149.999, 183.0]
Gli2	Bhlhe41	176	FALSE	(149.999, 183.0]
Hdac2	Tead3	176	FALSE	(149.999, 183.0]
Cebpa	Hoxa7	176	FALSE	(149.999, 183.0]
Gtf2b	Gfi1	176	TRUE	(149.999, 183.0]
Sp4	E2f1	176	FALSE	(149.999, 183.0]
Klf16	Gtf2b	176	FALSE	(149.999, 183.0]
Tcf12	Rxra	176	FALSE	(149.999, 183.0]
Tead2	Hdac2	176	TRUE	(149.999, 183.0]
Nfatc2	Rest	176	FALSE	(149.999, 183.0]
Tcf12	Fos	176	FALSE	(149.999, 183.0]
Xbp1	Rxra	176	FALSE	(149.999, 183.0]
Gfi1	Gtf2b	176	TRUE	(149.999, 183.0]
Hoxb2	Cebpe	176	FALSE	(149.999, 183.0]
Patz1	Gtf2b	176	FALSE	(149.999, 183.0]
Gtf2b	Sp4	176	FALSE	(149.999, 183.0]
Gabpa	Ets2	176	FALSE	(149.999, 183.0]
Egr1	Elf1	176	FALSE	(149.999, 183.0]
Cebpe	Hoxb2	176	FALSE	(149.999, 183.0]
Gabpa	Tcf7l2	176	FALSE	(149.999, 183.0]
Ddit3	Foxa2	176	FALSE	(149.999, 183.0]
Stat1	Fosb	176	FALSE	(149.999, 183.0]
E2f1	Sp4	176	FALSE	(149.999, 183.0]
Tcf7l2	Gabpa	176	FALSE	(149.999, 183.0]
Ets2	Gabpa	176	FALSE	(149.999, 183.0]
Usf1	Bcl3	176	FALSE	(149.999, 183.0]
Stat1	Gli1	176	FALSE	(149.999, 183.0]
Gtf2b	Gli1	176	FALSE	(149.999, 183.0]
Sox2	Ehf	176	TRUE	(149.999, 183.0]
Gli1	Stat1	176	FALSE	(149.999, 183.0]
Klf1	Mef2d	176	FALSE	(149.999, 183.0]
Sp3	Relb	176	FALSE	(149.999, 183.0]
Klf1	Stat6	176	FALSE	(149.999, 183.0]
Hdac2	Tead2	176	TRUE	(149.999, 183.0]
Mef2d	Klf1	176	FALSE	(149.999, 183.0]
Klf1	Gtf2b	176	FALSE	(149.999, 183.0]
Foxp1	Hoxb5	176	FALSE	(149.999, 183.0]
Irf7	Pparg	176	TRUE	(149.999, 183.0]
Klf1	Mef2a	176	FALSE	(149.999, 183.0]
Pparg	Irf7	176	TRUE	(149.999, 183.0]
Gata3	Tef	176	FALSE	(149.999, 183.0]
Fos	Tcf12	176	FALSE	(149.999, 183.0]
Bcl3	Usf1	176	FALSE	(149.999, 183.0]
Relb	Sp3	176	FALSE	(149.999, 183.0]
Sox11	Mef2a	176	FALSE	(149.999, 183.0]
Mef2a	Sox11	176	FALSE	(149.999, 183.0]
Arid3a	Pbx3	176	FALSE	(149.999, 183.0]
Gtf2b	Patz1	176	FALSE	(149.999, 183.0]
Hoxb5	Foxp1	176	FALSE	(149.999, 183.0]
Rest	Nfatc2	176	FALSE	(149.999, 183.0]
Elf1	Egr1	176	FALSE	(149.999, 183.0]
Gli1	Gtf2b	176	FALSE	(149.999, 183.0]
Foxa2	Ddit3	176	FALSE	(149.999, 183.0]
Sp4	Gtf2b	176	FALSE	(149.999, 183.0]
Bhlhe41	Gli2	176	FALSE	(149.999, 183.0]
Mafk	Sox10	176	TRUE	(149.999, 183.0]
Gtf2b	Klf1	176	FALSE	(149.999, 183.0]
Stat6	Klf1	176	FALSE	(149.999, 183.0]
Fosb	Stat1	176	FALSE	(149.999, 183.0]
Mef2a	Klf1	176	FALSE	(149.999, 183.0]
Tead3	Hdac2	176	FALSE	(149.999, 183.0]
Tef	Gata3	176	FALSE	(149.999, 183.0]
Mxi1	Arid3a	176	TRUE	(149.999, 183.0]
Rxra	Tcf12	176	FALSE	(149.999, 183.0]
Hoxa7	Cebpa	176	FALSE	(149.999, 183.0]
Irf8	Tcf12	176	FALSE	(149.999, 183.0]
Sox10	Mafk	176	TRUE	(149.999, 183.0]
Ehf	Sox2	176	TRUE	(149.999, 183.0]
Pbx3	Arid3a	176	FALSE	(149.999, 183.0]
Arid3a	Mxi1	176	TRUE	(149.999, 183.0]
Gtf2b	Klf16	176	FALSE	(149.999, 183.0]
Rxra	Xbp1	176	FALSE	(149.999, 183.0]
Nr3c1	Nfatc2	176	FALSE	(149.999, 183.0]
Nfic	Stat5a	177	FALSE	(149.999, 183.0]
Pparg	Mafb	177	FALSE	(149.999, 183.0]
Nfyb	Sox2	177	TRUE	(149.999, 183.0]
Stat5a	Nfic	177	FALSE	(149.999, 183.0]
Nr3c1	Hcfc1	177	TRUE	(149.999, 183.0]
Gata2	Kdm5a	177	FALSE	(149.999, 183.0]
Sox17	Foxp2	177	FALSE	(149.999, 183.0]
Nfya	Nfia	177	FALSE	(149.999, 183.0]
Jund	Bcl3	177	TRUE	(149.999, 183.0]
Sp3	Tgif1	177	FALSE	(149.999, 183.0]
Elf4	Elf2	177	FALSE	(149.999, 183.0]
Tgif1	Sp3	177	FALSE	(149.999, 183.0]
Gabpa	Foxp2	177	FALSE	(149.999, 183.0]
Nfia	Nfya	177	FALSE	(149.999, 183.0]
Foxk1	Nr2f2	177	FALSE	(149.999, 183.0]
Sox11	Cebpa	177	FALSE	(149.999, 183.0]
Stat5a	Klf5	177	FALSE	(149.999, 183.0]
E2f2	Nfkb2	177	FALSE	(149.999, 183.0]
Foxo3	Msx1	177	FALSE	(149.999, 183.0]
Gabpa	Ets1	177	FALSE	(149.999, 183.0]
Rxra	Irf3	177	FALSE	(149.999, 183.0]
Kdm5a	Gata2	177	FALSE	(149.999, 183.0]
Tcf7l2	Nr3c1	177	FALSE	(149.999, 183.0]
Irf7	Egr2	177	FALSE	(149.999, 183.0]
Mafb	Pparg	177	FALSE	(149.999, 183.0]
Egr2	Irf7	177	FALSE	(149.999, 183.0]
Elk3	Fosb	177	FALSE	(149.999, 183.0]
Nr3c1	Tcf7l2	177	FALSE	(149.999, 183.0]
Mitf	Foxc1	177	FALSE	(149.999, 183.0]
[truncated: 10,199 more rows]

## Sheet: CSI_scores
Regulon1	Regulon2	CSI_Score	STRING_CombinedScore
Arid3a	Arid3a	0.994253
Arid3a	Atf3	0
Arid3a	Atf4	0
Arid3a	Atf7	0
Arid3a	Bach1	0.706897
Arid3a	Batf	0.5
Arid3a	Bcl3	0.293103	184
Arid3a	Bdp1	0.58046
Arid3a	Bhlhe41	0.00574713	223
Arid3a	Cebpa	0.787356	375
Arid3a	Cebpb	0.735632	248
Arid3a	Cebpd	0.925287
Arid3a	Cebpe	0.982759
Arid3a	Cebpz	0.183908
Arid3a	Creb3	0.0229885
Arid3a	Creb3l1	0
Arid3a	Crem	0.0287356
Arid3a	Ctcf	0.551724	183
Arid3a	Dbp	0.00574713
Arid3a	Ddit3	0.264368
Arid3a	E2f1	0.804598	214
Arid3a	E2f2	0.931034	192
Arid3a	E2f4	0.189655	275
Arid3a	E2f6	0.143678	216
Arid3a	E2f7	0.724138
Arid3a	Egr1	0	183
Arid3a	Egr2	0
Arid3a	Ehf	0.00574713
Arid3a	Elf1	0.591954
Arid3a	Elf2	0.373563
Arid3a	Elf3	0.0172414
Arid3a	Elf4	0.971264
Arid3a	Elk1	0
Arid3a	Elk3	0.0632184
Arid3a	Elk4	0.33908
Arid3a	Eomes	0.189655
Arid3a	Ep300	0.609195	207
Arid3a	Esrra	0.0804598
Arid3a	Ets1	0.522989	174
Arid3a	Ets2	0.0172414
Arid3a	Etv3	0.758621
Arid3a	Fli1	0.913793
Arid3a	Fos	0.00574713	252
Arid3a	Fosb	0
Arid3a	Fosl1	0
Arid3a	Fosl2	0.0632184
Arid3a	Foxa2	0.00574713
Arid3a	Foxc1	0.00574713
Arid3a	Foxk1	0.431034
Arid3a	Foxo1	0.0517241
Arid3a	Foxo3	0.00574713
Arid3a	Foxp1	0.132184	265
Arid3a	Foxp2	0
Arid3a	Gabpa	0.37931	153
Arid3a	Gata2	0.5	233
Arid3a	Gata3	0	215
Arid3a	Gata6	0
Arid3a	Gfi1	0.66092
Arid3a	Gli1	0
Arid3a	Gli2	0.00574713
Arid3a	Gmeb1	0.689655
Arid3a	Gmeb2	0.16092
Arid3a	Grhl1	0
Arid3a	Gtf2b	0.362069
Arid3a	Hcfc1	0.626437
Arid3a	Hdac2	0	307
Arid3a	Hlf	0.126437
Arid3a	Hnf1b	0.00574713
Arid3a	Hoxa5	0
Arid3a	Hoxa7	0
Arid3a	Hoxa9	0
Arid3a	Hoxb2	0
Arid3a	Hoxb5	0
Arid3a	Hoxb7	0	426
Arid3a	Hoxc10	0
Arid3a	Hoxc6	0
Arid3a	Hsf1	0.229885
Arid3a	Ikzf1	0.908046
Arid3a	Irf1	0.132184
Arid3a	Irf2	0.626437
Arid3a	Irf3	0.373563
Arid3a	Irf5	0.804598
Arid3a	Irf7	0.724138
Arid3a	Irf8	0.83908
Arid3a	Irf9	0.557471
Arid3a	Jun	0	241
Arid3a	Junb	0.00574713	209
Arid3a	Jund	0.00574713	209
Arid3a	Kdm5a	0.362069
Arid3a	Klf1	0.0229885	261
Arid3a	Klf15	0
Arid3a	Klf16	0
Arid3a	Klf5	0.00574713
Arid3a	Lef1	0.109195
Arid3a	Mafb	0.545977
Arid3a	Maff	0	163
Arid3a	Mafg	0.936782	482
Arid3a	Mafk	0.00574713	297
Arid3a	Mecp2	0.0517241
Arid3a	Mef2a	0.0632184	312
Arid3a	Mef2d	0.293103
Arid3a	Mitf	0.045977
Arid3a	Msx1	0
Arid3a	Mxi1	0.936782	176
Arid3a	Myc	0	178
Arid3a	Nfat5	0.0804598
Arid3a	Nfatc2	0.00574713
Arid3a	Nfatc4	0
Arid3a	Nfe2	0.971264	157
Arid3a	Nfia	0
Arid3a	Nfic	0.0517241	241
Arid3a	Nfil3	0.591954
Arid3a	Nfkb2	0.408046
Arid3a	Nfya	0.557471	156
Arid3a	Nfyb	0.327586	311
Arid3a	Nr1h3	0.0517241
Arid3a	Nr2c2	0.591954	185
Arid3a	Nr2f2	0
Arid3a	Nr2f6	0
Arid3a	Nr3c1	0.724138	288
Arid3a	Patz1	0.494253
Arid3a	Pbx3	0	176
Arid3a	Pitx2	0
Arid3a	Pknox1	0.0287356
Arid3a	Pml	0.557471	182
Arid3a	Pou2af1	0.626437	260
Arid3a	Ppard	0.00574713
Arid3a	Pparg	0.0977011
Arid3a	Rara	0.896552
Arid3a	Rarg	0
Arid3a	Rel	0.586207	199
Arid3a	Rela	0.241379
Arid3a	Relb	0.373563
Arid3a	Rest	0.0114943
Arid3a	Runx3	0.637931
Arid3a	Rxra	0.293103
Arid3a	Rxrb	0.413793
Arid3a	Setdb1	0.201149
Arid3a	Sin3a	0.436782	530
Arid3a	Snai3	0
Arid3a	Sox10	0	200
Arid3a	Sox11	0
Arid3a	Sox17	0.00574713
Arid3a	Sox2	0	526
Arid3a	Sp1	0.58046
Arid3a	Sp3	0.448276
Arid3a	Sp4	0.310345
Arid3a	Spib	0.655172
Arid3a	Srebf1	0.00574713
Arid3a	Srf	0.00574713
Arid3a	Stat1	0.701149	237
Arid3a	Stat3	0.350575	179
Arid3a	Stat5a	0.126437
Arid3a	Stat5b	0.385057
Arid3a	Stat6	0.902299
Arid3a	Taf1	0.241379	220
Arid3a	Taf7	0.00574713	214
Arid3a	Tal1	0.114943	181
Arid3a	Tbx2	0
Arid3a	Tcf12	0.155172	179
Arid3a	Tcf7	0.0862069
Arid3a	Tcf7l2	0.0977011
Arid3a	Tead2	0
Arid3a	Tead3	0
Arid3a	Tead4	0	245
Arid3a	Tef	0.00574713
Arid3a	Tfdp1	0.735632	245
Arid3a	Tfe3	0.310345
Arid3a	Tgif1	0
Arid3a	Trp53	0	477
Arid3a	Usf1	0.534483	151
Arid3a	Usf2	0.781609
Arid3a	Xbp1	0.091954
Arid3a	Yy1	0.436782	247
Atf3	Arid3a	0
Atf3	Atf3	0.994253
Atf3	Atf4	0.873563	987
Atf3	Atf7	0.091954	333
Atf3	Bach1	0.408046
Atf3	Batf	0.00574713	336
Atf3	Bcl3	0.666667	369
Atf3	Bdp1	0
Atf3	Bhlhe41	0.436782	197
Atf3	Cebpa	0.241379	586
Atf3	Cebpb	0.689655	753
Atf3	Cebpd	0.522989
Atf3	Cebpe	0	280
Atf3	Cebpz	0
Atf3	Creb3	0.344828	263
Atf3	Creb3l1	0.672414
Atf3	Crem	0.5	911
Atf3	Ctcf	0	284
Atf3	Dbp	0.41954
Atf3	Ddit3	0.545977	967
Atf3	E2f1	0	187
Atf3	E2f2	0	199
Atf3	E2f4	0	372
Atf3	E2f6	0	279
Atf3	E2f7	0
Atf3	Egr1	0.902299	886
Atf3	Egr2	0.850575	603
Atf3	Ehf	0.827586
Atf3	Elf1	0
Atf3	Elf2	0
Atf3	Elf3	0.850575
Atf3	Elf4	0
Atf3	Elk1	0
Atf3	Elk3	0.488506
Atf3	Elk4	0	182
Atf3	Eomes	0	175
Atf3	Ep300	0	336
Atf3	Esrra	0.5	222
Atf3	Ets1	0	339
Atf3	Ets2	0.816092	387
Atf3	Etv3	0.0689655	184
Atf3	Fli1	0
Atf3	Fos	0.982759	887
Atf3	Fosb	0.896552	332
Atf3	Fosl1	0.948276	430
Atf3	Fosl2	0.885057	560
Atf3	Foxa2	0.321839	180
Atf3	Foxc1	0.833333	205
Atf3	Foxk1	0.00574713
Atf3	Foxo1	0.166667	540
Atf3	Foxo3	0.0172414	292
Atf3	Foxp1	0
Atf3	Foxp2	0.54023
Atf3	Gabpa	0	187
Atf3	Gata2	0.287356	284
Atf3	Gata3	0.816092	295
Atf3	Gata6	0.477011	230
Atf3	Gfi1	0	161
Atf3	Gli1	0.505747
Atf3	Gli2	0.643678
Atf3	Gmeb1	0
Atf3	Gmeb2	0
Atf3	Grhl1	0.931034
Atf3	Gtf2b	0	172
Atf3	Hcfc1	0
Atf3	Hdac2	0.373563	650
Atf3	Hlf	0.0229885
Atf3	Hnf1b	0.45977
Atf3	Hoxa5	0.212644
Atf3	Hoxa7	0.764368
Atf3	Hoxa9	0.465517
Atf3	Hoxb2	0.505747
Atf3	Hoxb5	0.091954
Atf3	Hoxb7	0.586207
Atf3	Hoxc10	0.517241
Atf3	Hoxc6	0.729885
Atf3	Hsf1	0	713
Atf3	Ikzf1	0
Atf3	Irf1	0.574713	503
Atf3	Irf2	0	266
Atf3	Irf3	0	319
Atf3	Irf5	0.00574713	246
Atf3	Irf7	0.206897	626
Atf3	Irf8	0	301
Atf3	Irf9	0.0402299	300
Atf3	Jun	0.982759	995
Atf3	Junb	0.873563	853
Atf3	Jund	0.873563	664
Atf3	Kdm5a	0
Atf3	Klf1	0.045977	162
Atf3	Klf15	0.390805	201
Atf3	Klf16	0.844828	193
Atf3	Klf5	0.83908	200
Atf3	Lef1	0	185
Atf3	Mafb	0.413793	361
Atf3	Maff	0.87931	692
Atf3	Mafg	0.218391	412
Atf3	Mafk	0.885057	356
Atf3	Mecp2	0
Atf3	Mef2a	0.494253	282
Atf3	Mef2d	0	232
Atf3	Mitf	0.718391	182
Atf3	Msx1	0.672414
Atf3	Mxi1	0.0229885	250
Atf3	Myc	0.896552	544
Atf3	Nfat5	0.666667	216
Atf3	Nfatc2	0.666667	223
Atf3	Nfatc4	0.58046	202
Atf3	Nfe2	0	211
Atf3	Nfia	0.574713
Atf3	Nfic	0.5	191
Atf3	Nfil3	0.850575	531
Atf3	Nfkb2	0.16092	535
Atf3	Nfya	0	415
Atf3	Nfyb	0	392
Atf3	Nr1h3	0.482759	234
Atf3	Nr2c2	0
Atf3	Nr2f2	0.390805
Atf3	Nr2f6	0.511494
Atf3	Nr3c1	0	221
Atf3	Patz1	0
Atf3	Pbx3	0.143678	230
Atf3	Pitx2	0.764368
Atf3	Pknox1	0.0517241
Atf3	Pml	0
Atf3	Pou2af1	0	197
Atf3	Ppard	0.632184	151
Atf3	Pparg	0.672414	585
Atf3	Rara	0.0172414
Atf3	Rarg	0.913793
Atf3	Rel	0.0287356	415
Atf3	Rela	0.609195	379
Atf3	Relb	0.241379	398
Atf3	Rest	0	214
Atf3	Runx3	0	169
Atf3	Rxra	0.804598	187
Atf3	Rxrb	0
Atf3	Setdb1	0
Atf3	Sin3a	0	220
Atf3	Snai3	0.137931
Atf3	Sox10	0.770115	179
Atf3	Sox11	0.482759	740
Atf3	Sox17	0.563218
Atf3	Sox2	0.287356	222
Atf3	Sp1	0	172
Atf3	Sp3	0	174
Atf3	Sp4	0
Atf3	Spib	0
Atf3	Srebf1	0.522989	226
Atf3	Srf	0.758621	339
Atf3	Stat1	0	719
Atf3	Stat3	0.804598	731
Atf3	Stat5a	0	261
Atf3	Stat5b	0
Atf3	Stat6	0	233
Atf3	Taf1	0	283
Atf3	Taf7	0.0747126
Atf3	Tal1	0.0344828	169
Atf3	Tbx2	0.454023
Atf3	Tcf12	0	175
Atf3	Tcf7	0
Atf3	Tcf7l2	0.706897
Atf3	Tead2	0.241379	192
Atf3	Tead3	0.724138	200
Atf3	Tead4	0.54023	286
Atf3	Tef	0.41954	168
Atf3	Tfdp1	0
Atf3	Tfe3	0.241379
Atf3	Tgif1	0.810345	424
Atf3	Trp53	0	800
Atf3	Usf1	0	352
Atf3	Usf2	0	302
Atf3	Xbp1	0.62069	934
Atf3	Yy1	0	304
Atf4	Arid3a	0
Atf4	Atf3	0.873563	987
Atf4	Atf4	0.994253
Atf4	Atf7	0.431034	293
Atf4	Bach1	0.477011
Atf4	Batf	0.0517241	337
Atf4	Bcl3	0.712644
Atf4	Bdp1	0
Atf4	Bhlhe41	0.5
Atf4	Cebpa	0.0229885	591
Atf4	Cebpb	0.793103	630
Atf4	Cebpd	0.66092
Atf4	Cebpe	0	306
Atf4	Cebpz	0
Atf4	Creb3	0.488506	901
Atf4	Creb3l1	0.810345	901
Atf4	Crem	0.724138	861
Atf4	Ctcf	0
Atf4	Dbp	0.488506	242
Atf4	Ddit3	0.810345	994
Atf4	E2f1	0	171
Atf4	E2f2	0	160
Atf4	E2f4	0
Atf4	E2f6	0
Atf4	E2f7	0
Atf4	Egr1	0.87931	415
Atf4	Egr2	0.91954	159
Atf4	Ehf	0.367816
Atf4	Elf1	0
Atf4	Elf2	0	312
Atf4	Elf3	0.396552
Atf4	Elf4	0
Atf4	Elk1	0
Atf4	Elk3	0.614943
Atf4	Elk4	0
Atf4	Eomes	0
Atf4	Ep300	0	865
Atf4	Esrra	0.149425	166
Atf4	Ets1	0	151
Atf4	Ets2	0.741379	162
Atf4	Etv3	0.0287356
Atf4	Fli1	0
Atf4	Fos	0.850575	789
Atf4	Fosb	0.931034	362
Atf4	Fosl1	0.942529	708
Atf4	Fosl2	0.91954	620
Atf4	Foxa2	0.206897
Atf4	Foxc1	0.948276
Atf4	Foxk1	0.0229885
Atf4	Foxo1	0.764368	729
Atf4	Foxo3	0	476
Atf4	Foxp1	0.0402299
Atf4	Foxp2	0.488506
Atf4	Gabpa	0
Atf4	Gata2	0.0574713
Atf4	Gata3	0.37931
Atf4	Gata6	0.557471
Atf4	Gfi1	0
Atf4	Gli1	0.609195
Atf4	Gli2	0.775862
Atf4	Gmeb1	0
Atf4	Gmeb2	0.126437
Atf4	Grhl1	0.465517
Atf4	Gtf2b	0	359
Atf4	Hcfc1	0
Atf4	Hdac2	0.0344828
Atf4	Hlf	0	242
Atf4	Hnf1b	0.304598
Atf4	Hoxa5	0.16092
Atf4	Hoxa7	0.327586
Atf4	Hoxa9	0.344828
Atf4	Hoxb2	0.522989
Atf4	Hoxb5	0.0804598
Atf4	Hoxb7	0.293103
Atf4	Hoxc10	0.632184
Atf4	Hoxc6	0.689655
Atf4	Hsf1	0	278
Atf4	Ikzf1	0
Atf4	Irf1	0.637931	229
Atf4	Irf2	0
Atf4	Irf3	0	179
Atf4	Irf5	0
Atf4	Irf7	0.132184	542
Atf4	Irf8	0
Atf4	Irf9	0.0287356
Atf4	Jun	0.862069	827
Atf4	Junb	0.873563	221
Atf4	Jund	0.850575	217
Atf4	Kdm5a	0
Atf4	Klf1	0.0344828
Atf4	Klf15	0.333333	162
Atf4	Klf16	0.54023
Atf4	Klf5	0.385057
Atf4	Lef1	0
Atf4	Mafb	0.137931	309
Atf4	Maff	0.982759	296
Atf4	Mafg	0.712644	389
Atf4	Mafk	0.982759	376
Atf4	Mecp2	0
Atf4	Mef2a	0.758621
Atf4	Mef2d	0.0517241
Atf4	Mitf	0.614943	327
Atf4	Msx1	0.787356
Atf4	Mxi1	0.00574713
Atf4	Myc	0.977011	460
Atf4	Nfat5	0.885057
Atf4	Nfatc2	0.931034
Atf4	Nfatc4	0.706897	192
Atf4	Nfe2	0	429
Atf4	Nfia	0.729885
Atf4	Nfic	0.54023
Atf4	Nfil3	0.735632	365
Atf4	Nfkb2	0.408046
Atf4	Nfya	0	206
Atf4	Nfyb	0
Atf4	Nr1h3	0.482759	329
Atf4	Nr2c2	0
Atf4	Nr2f2	0.454023
Atf4	Nr2f6	0.333333
Atf4	Nr3c1	0.00574713	288
Atf4	Patz1	0
Atf4	Pbx3	0.488506
Atf4	Pitx2	0.356322
Atf4	Pknox1	0.281609
Atf4	Pml	0
Atf4	Pou2af1	0
Atf4	Ppard	0.505747	235
Atf4	Pparg	0.477011	360
Atf4	Rara	0
Atf4	Rarg	0.666667
Atf4	Rel	0.0517241	179
Atf4	Rela	0.758621	237
Atf4	Relb	0.505747	215
Atf4	Rest	0.0114943
Atf4	Runx3	0
Atf4	Rxra	0.178161	171
Atf4	Rxrb	0
Atf4	Setdb1	0
Atf4	Sin3a	0
Atf4	Snai3	0.12069
Atf4	Sox10	0.718391	232
Atf4	Sox11	0.528736	153
Atf4	Sox17	0.488506	163
Atf4	Sox2	0.172414
Atf4	Sp1	0	247
Atf4	Sp3	0	165
Atf4	Sp4	0
Atf4	Spib	0
Atf4	Srebf1	0.229885	540
Atf4	Srf	0.896552
Atf4	Stat1	0	286
Atf4	Stat3	0.91954	464
Atf4	Stat5a	0.00574713	195
Atf4	Stat5b	0
Atf4	Stat6	0
Atf4	Taf1	0
Atf4	Taf7	0.126437
Atf4	Tal1	0.0114943
Atf4	Tbx2	0.436782
Atf4	Tcf12	0
Atf4	Tcf7	0
Atf4	Tcf7l2	0.528736
Atf4	Tead2	0.298851
Atf4	Tead3	0.574713
Atf4	Tead4	0.362069
Atf4	Tef	0.488506	245
Atf4	Tfdp1	0
Atf4	Tfe3	0.655172	270
Atf4	Tgif1	0.931034
Atf4	Trp53	0	587
Atf4	Usf1	0	179
Atf4	Usf2	0
Atf4	Xbp1	0.821839	987
Atf4	Yy1	0	182
Atf7	Arid3a	0
Atf7	Atf3	0.091954	333
Atf7	Atf4	0.431034	293
Atf7	Atf7	0.994253
Atf7	Bach1	0.114943	446
Atf7	Batf	0.045977	262
Atf7	Bcl3	0.0517241
Atf7	Bdp1	0.166667
Atf7	Bhlhe41	0.0632184
Atf7	Cebpa	0.0229885
Atf7	Cebpb	0.12069
Atf7	Cebpd	0.183908
Atf7	Cebpe	0
Atf7	Cebpz	0.109195	332
Atf7	Creb3	0.54023
Atf7	Creb3l1	0.425287
Atf7	Crem	0.327586	230
Atf7	Ctcf	0.224138
Atf7	Dbp	0.568966
Atf7	Ddit3	0.264368	175
Atf7	E2f1	0.00574713
Atf7	E2f2	0
Atf7	E2f4	0	270
Atf7	E2f6	0.114943
Atf7	E2f7	0
Atf7	Egr1	0.413793	163
Atf7	Egr2	0.33908
Atf7	Ehf	0
Atf7	Elf1	0.103448
Atf7	Elf2	0.672414
Atf7	Elf3	0
Atf7	Elf4	0.0114943
Atf7	Elk1	0.62069	194
Atf7	Elk3	0.178161
Atf7	Elk4	0.632184
Atf7	Eomes	0.0172414
Atf7	Ep300	0.304598
Atf7	Esrra	0
Atf7	Ets1	0.126437
Atf7	Ets2	0.0517241
Atf7	Etv3	0.0229885
Atf7	Fli1	0.0114943
Atf7	Fos	0.166667	769
Atf7	Fosb	0.350575
Atf7	Fosl1	0.218391	275
Atf7	Fosl2	0.16092	640
Atf7	Foxa2	0.126437
Atf7	Foxc1	0.45977
Atf7	Foxk1	0.0517241	164
Atf7	Foxo1	0.275862
Atf7	Foxo3	0.0229885
Atf7	Foxp1	0.270115
Atf7	Foxp2	0.172414
Atf7	Gabpa	0.252874
Atf7	Gata2	0.0344828	184
Atf7	Gata3	0.206897	184
Atf7	Gata6	0.247126	249
Atf7	Gfi1	0.0114943
Atf7	Gli1	0.45977
Atf7	Gli2	0.454023
Atf7	Gmeb1	0.109195
Atf7	Gmeb2	0.396552
Atf7	Grhl1	0.045977
Atf7	Gtf2b	0.0804598
Atf7	Hcfc1	0.201149
Atf7	Hdac2	0	250
Atf7	Hlf	0.0114943
Atf7	Hnf1b	0.00574713
Atf7	Hoxa5	0.298851
Atf7	Hoxa7	0.126437
Atf7	Hoxa9	0.0344828
Atf7	Hoxb2	0.557471
Atf7	Hoxb5	0.321839
Atf7	Hoxb7	0.0172414
Atf7	Hoxc10	0.293103
Atf7	Hoxc6	0.195402
Atf7	Hsf1	0.385057	259
Atf7	Ikzf1	0.0689655
Atf7	Irf1	0.045977
Atf7	Irf2	0.16092
Atf7	Irf3	0.511494
Atf7	Irf5	0.0689655
Atf7	Irf7	0
Atf7	Irf8	0.0804598
Atf7	Irf9	0.0172414
Atf7	Jun	0.114943	673
Atf7	Junb	0.166667	722
Atf7	Jund	0.172414	524
Atf7	Kdm5a	0.701149
Atf7	Klf1	0.00574713
Atf7	Klf15	0.218391
Atf7	Klf16	0.0632184	357
Atf7	Klf5	0	175
Atf7	Lef1	0.0862069	152
Atf7	Mafb	0.00574713
Atf7	Maff	0.350575
Atf7	Mafg	0.0229885
Atf7	Mafk	0.304598
Atf7	Mecp2	0.482759
Atf7	Mef2a	0.16092	277
Atf7	Mef2d	0.568966	277
Atf7	Mitf	0.126437
Atf7	Msx1	0.091954
Atf7	Mxi1	0.0114943
Atf7	Myc	0.33908
Atf7	Nfat5	0.304598	150
Atf7	Nfatc2	0.436782
Atf7	Nfatc4	0.494253
Atf7	Nfe2	0.00574713	591
Atf7	Nfia	0.436782
Atf7	Nfic	0.310345
Atf7	Nfil3	0.103448	160
Atf7	Nfkb2	0.183908
Atf7	Nfya	0.0689655	169
Atf7	Nfyb	0
Atf7	Nr1h3	0.0747126
Atf7	Nr2c2	0.310345	166
Atf7	Nr2f2	0.45977
Atf7	Nr2f6	0
Atf7	Nr3c1	0.385057
Atf7	Patz1	0.149425
Atf7	Pbx3	0.275862
Atf7	Pitx2	0.0229885
Atf7	Pknox1	0.0517241
Atf7	Pml	0.143678	153
Atf7	Pou2af1	0.344828
Atf7	Ppard	0.00574713
Atf7	Pparg	0.0402299	168
Atf7	Rara	0.0172414
Atf7	Rarg	0.12069
Atf7	Rel	0.149425
Atf7	Rela	0.103448	151
Atf7	Relb	0.12069
Atf7	Rest	0.183908
Atf7	Runx3	0.0747126
Atf7	Rxra	0
Atf7	Rxrb	0.344828
Atf7	Setdb1	0.436782	414
Atf7	Sin3a	0.132184	197
Atf7	Snai3	0
Atf7	Sox10	0.235632	181
Atf7	Sox11	0.137931
Atf7	Sox17	0.0574713
Atf7	Sox2	0
Atf7	Sp1	0.333333
Atf7	Sp3	0.212644
Atf7	Sp4	0.293103
Atf7	Spib	0.137931
Atf7	Srebf1	0.103448
Atf7	Srf	0.201149	168
Atf7	Stat1	0.0689655	168
Atf7	Stat3	0.229885	182
Atf7	Stat5a	0.143678	170
Atf7	Stat5b	0.132184	170
Atf7	Stat6	0.0344828	221
Atf7	Taf1	0.655172	158
Atf7	Taf7	0
Atf7	Tal1	0.00574713
Atf7	Tbx2	0.614943
Atf7	Tcf12	0.206897
Atf7	Tcf7	0.103448	426
Atf7	Tcf7l2	0.091954
Atf7	Tead2	0.183908	264
Atf7	Tead3	0.287356	264
Atf7	Tead4	0	264
Atf7	Tef	0.218391
Atf7	Tfdp1	0	226
Atf7	Tfe3	0.0632184
Atf7	Tgif1	0.206897
Atf7	Trp53	0
Atf7	Usf1	0.212644
Atf7	Usf2	0.0977011
Atf7	Xbp1	0.488506	415
Atf7	Yy1	0.689655	197
Bach1	Arid3a	0.706897
Bach1	Atf3	0.408046
Bach1	Atf4	0.477011
Bach1	Atf7	0.114943	446
Bach1	Bach1	0.994253
Bach1	Batf	0.718391	182
Bach1	Bcl3	0.850575
Bach1	Bdp1	0.0172414
Bach1	Bhlhe41	0.396552
Bach1	Cebpa	0.856322
Bach1	Cebpb	0.896552	180
Bach1	Cebpd	0.545977
Bach1	Cebpe	0.534483
Bach1	Cebpz	0.143678
Bach1	Creb3	0.12069
Bach1	Creb3l1	0.0747126
Bach1	Crem	0.850575
Bach1	Ctcf	0.109195
Bach1	Dbp	0.0689655
Bach1	Ddit3	0.390805	159
Bach1	E2f1	0.0517241
Bach1	E2f2	0.189655
Bach1	E2f4	0
Bach1	E2f6	0.0804598
Bach1	E2f7	0
Bach1	Egr1	0.316092
Bach1	Egr2	0.522989
Bach1	Ehf	0.0287356
Bach1	Elf1	0.413793
Bach1	Elf2	0.16092
Bach1	Elf3	0.0689655
Bach1	Elf4	0.689655
Bach1	Elk1	0
Bach1	Elk3	0.534483
Bach1	Elk4	0.16092
Bach1	Eomes	0.0574713
Bach1	Ep300	0.390805
Bach1	Esrra	0.0229885
Bach1	Ets1	0.431034
Bach1	Ets2	0.58046
Bach1	Etv3	0.936782
Bach1	Fli1	0.62069
Bach1	Fos	0.396552	237
Bach1	Fosb	0.494253
Bach1	Fosl1	0.241379
Bach1	Fosl2	0.747126
Bach1	Foxa2	0.0344828	165
Bach1	Foxc1	0.189655
Bach1	Foxk1	0.321839
Bach1	Foxo1	0.270115
Bach1	Foxo3	0
Bach1	Foxp1	0.0747126
Bach1	Foxp2	0.0114943
Bach1	Gabpa	0
Bach1	Gata2	0.310345
Bach1	Gata3	0.0689655
Bach1	Gata6	0.0172414
Bach1	Gfi1	0.0114943
Bach1	Gli1	0.0172414
Bach1	Gli2	0.0862069
Bach1	Gmeb1	0.0574713
Bach1	Gmeb2	0.155172
Bach1	Grhl1	0.12069
Bach1	Gtf2b	0.00574713
Bach1	Hcfc1	0.0574713	231
Bach1	Hdac2	0
Bach1	Hlf	0.0689655
Bach1	Hnf1b	0.0287356	321
Bach1	Hoxa5	0
Bach1	Hoxa7	0
Bach1	Hoxa9	0
Bach1	Hoxb2	0
Bach1	Hoxb5	0
Bach1	Hoxb7	0
Bach1	Hoxc10	0.0114943
Bach1	Hoxc6	0.0344828
Bach1	Hsf1	0
Bach1	Ikzf1	0.511494
Bach1	Irf1	0.695402
Bach1	Irf2	0.511494
Bach1	Irf3	0.00574713
Bach1	Irf5	0.850575
Bach1	Irf7	0.827586
Bach1	Irf8	0.787356
Bach1	Irf9	0.689655
Bach1	Jun	0.350575	153
Bach1	Junb	0.643678
Bach1	Jund	0.62069
Bach1	Kdm5a	0.137931
Bach1	Klf1	0
Bach1	Klf15	0.00574713
Bach1	Klf16	0.413793
Bach1	Klf5	0
Bach1	Lef1	0.155172
Bach1	Mafb	0.885057	329
Bach1	Maff	0.465517	372
Bach1	Mafg	0.632184	754
Bach1	Mafk	0.568966	811
Bach1	Mecp2	0.045977
Bach1	Mef2a	0.752874
Bach1	Mef2d	0.33908
Bach1	Mitf	0.678161
Bach1	Msx1	0.0804598
Bach1	Mxi1	0.764368	154
Bach1	Myc	0.534483	248
Bach1	Nfat5	0.367816
Bach1	Nfatc2	0.264368
Bach1	Nfatc4	0.0287356
Bach1	Nfe2	0.511494	177
Bach1	Nfia	0.12069
Bach1	Nfic	0.114943
Bach1	Nfil3	0.867816
Bach1	Nfkb2	0.764368
Bach1	Nfya	0.247126
Bach1	Nfyb	0
Bach1	Nr1h3	0.172414
Bach1	Nr2c2	0.0689655	216
Bach1	Nr2f2	0.0172414
Bach1	Nr2f6	0.0114943
Bach1	Nr3c1	0.41954
Bach1	Patz1	0.0632184	202
Bach1	Pbx3	0
Bach1	Pitx2	0.00574713
Bach1	Pknox1	0.241379
Bach1	Pml	0.126437
Bach1	Pou2af1	0.114943
Bach1	Ppard	0.0804598
Bach1	Pparg	0.494253
Bach1	Rara	0.798851
Bach1	Rarg	0.0114943
Bach1	Rel	0.856322
Bach1	Rela	0.735632
Bach1	Relb	0.821839
Bach1	Rest	0
Bach1	Runx3	0.586207
Bach1	Rxra	0.413793
Bach1	Rxrb	0.206897
Bach1	Setdb1	0
Bach1	Sin3a	0
Bach1	Snai3	0
Bach1	Sox10	0.166667
Bach1	Sox11	0.132184
Bach1	Sox17	0.425287
Bach1	Sox2	0
Bach1	Sp1	0.229885
Bach1	Sp3	0.281609
Bach1	Sp4	0.143678
Bach1	Spib	0.37931
Bach1	Srebf1	0.0517241
Bach1	Srf	0.264368
Bach1	Stat1	0.609195
Bach1	Stat3	0.810345
Bach1	Stat5a	0.344828
Bach1	Stat5b	0.350575
Bach1	Stat6	0.850575
Bach1	Taf1	0
Bach1	Taf7	0.183908
Bach1	Tal1	0.0862069
Bach1	Tbx2	0.0229885
Bach1	Tcf12	0.137931
Bach1	Tcf7	0.137931
Bach1	Tcf7l2	0.477011
Bach1	Tead2	0
Bach1	Tead3	0
Bach1	Tead4	0.0172414
Bach1	Tef	0.212644
Bach1	Tfdp1	0
Bach1	Tfe3	0.873563
Bach1	Tgif1	0.683908
Bach1	Trp53	0	767
Bach1	Usf1	0.264368
Bach1	Usf2	0.643678
Bach1	Xbp1	0.517241
Bach1	Yy1	0.0574713
Batf	Arid3a	0.5
Batf	Atf3	0.00574713	336
Batf	Atf4	0.0517241	337
Batf	Atf7	0.045977	262
Batf	Bach1	0.718391	182
Batf	Batf	0.994253
Batf	Bcl3	0.821839	337
Batf	Bdp1	0.287356
Batf	Bhlhe41	0.0172414	175
Batf	Cebpa	0.293103	333
Batf	Cebpb	0.454023	291
Batf	Cebpd	0.0747126
Batf	Cebpe	0.436782
Batf	Cebpz	0.316092
Batf	Creb3	0
Batf	Creb3l1	0
Batf	Crem	0.741379	304
Batf	Ctcf	0.454023	356
Batf	Dbp	0.00574713	222
Batf	Ddit3	0.298851	194
Batf	E2f1	0.298851
Batf	E2f2	0.436782
Batf	E2f4	0
Batf	E2f6	0.132184	189
Batf	E2f7	0.0172414
Batf	Egr1	0	227
Batf	Egr2	0.114943	655
Batf	Ehf	0.00574713
Batf	Elf1	0.91954
Batf	Elf2	0.574713
Batf	Elf3	0.0287356
Batf	Elf4	0.793103	205
Batf	Elk1	0.0229885
Batf	Elk3	0.114943
Batf	Elk4	0.666667
Batf	Eomes	0.643678	682
Batf	Ep300	0.465517	331
Batf	Esrra	0.0172414	181
Batf	Ets1	0.902299	390
Batf	Ets2	0.12069
Batf	Etv3	0.896552
Batf	Fli1	0.793103
Batf	Fos	0.0402299	264
Batf	Fosb	0.0632184
Batf	Fosl1	0.00574713	165
Batf	Fosl2	0.448276	183
Batf	Foxa2	0
Batf	Foxc1	0.0114943
Batf	Foxk1	0.229885
Batf	Foxo1	0.712644	356
Batf	Foxo3	0.0172414	206
Batf	Foxp1	0.563218	289
Batf	Foxp2	0
Batf	Gabpa	0.362069	151
Batf	Gata2	0.114943	238
Batf	Gata3	0.327586	651
Batf	Gata6	0	193
Batf	Gfi1	0.442529	443
Batf	Gli1	0
Batf	Gli2	0
Batf	Gmeb1	0.0229885
Batf	Gmeb2	0.37931
Batf	Grhl1	0.0114943
Batf	Gtf2b	0.241379
Batf	Hcfc1	0.362069
Batf	Hdac2	0	263
Batf	Hlf	0.0287356	326
Batf	Hnf1b	0
Batf	Hoxa5	0
Batf	Hoxa7	0
Batf	Hoxa9	0
Batf	Hoxb2	0
Batf	Hoxb5	0
Batf	Hoxb7	0
Batf	Hoxc10	0
Batf	Hoxc6	0
Batf	Hsf1	0.304598	212
Batf	Ikzf1	0.821839	484
Batf	Irf1	0.87931	430
Batf	Irf2	0.862069	207
Batf	Irf3	0.563218
Batf	Irf5	0.844828	224
Batf	Irf7	0.896552	191
Batf	Irf8	0.833333	648
Batf	Irf9	0.902299	263
Batf	Jun	0.00574713	765
Batf	Junb	0.655172	880
Batf	Jund	0.195402	590
Batf	Kdm5a	0.465517
Batf	Klf1	0
Batf	Klf15	0
Batf	Klf16	0.454023
Batf	Klf5	0
Batf	Lef1	0.913793	211
Batf	Mafb	0.465517	184
Batf	Maff	0.0632184	284
Batf	Mafg	0.287356	428
Batf	Mafk	0.0862069	234
Batf	Mecp2	0.344828
Batf	Mef2a	0.137931	223
Batf	Mef2d	0.603448	185
Batf	Mitf	0.0114943
Batf	Msx1	0
Batf	Mxi1	0.385057	178
Batf	Myc	0.0862069	217
Batf	Nfat5	0.103448	184
Batf	Nfatc2	0.201149	407
Batf	Nfatc4	0
Batf	Nfe2	0.454023	310
Batf	Nfia	0.00574713
Batf	Nfic	0.0114943	217
Batf	Nfil3	0.373563	473
Batf	Nfkb2	0.873563	274
Batf	Nfya	0.45977
Batf	Nfyb	0
Batf	Nr1h3	0.0114943
Batf	Nr2c2	0.494253
Batf	Nr2f2	0
Batf	Nr2f6	0	206
Batf	Nr3c1	0.413793
Batf	Patz1	0.431034
Batf	Pbx3	0
Batf	Pitx2	0
Batf	Pknox1	0.218391
Batf	Pml	0.626437
Batf	Pou2af1	0.528736	389
Batf	Ppard	0.00574713
Batf	Pparg	0.0402299	186
Batf	Rara	0.689655
Batf	Rarg	0
Batf	Rel	0.862069	361
Batf	Rela	0.385057	285
Batf	Relb	0.873563	253
Batf	Rest	0.00574713	385
Batf	Runx3	0.965517	480
Batf	Rxra	0.0402299	198
Batf	Rxrb	0.505747
Batf	Setdb1	0.0402299
Batf	Sin3a	0.367816	153
Batf	Snai3	0.0344828
Batf	Sox10	0.00574713
Batf	Sox11	0
Batf	Sox17	0.00574713
Batf	Sox2	0	159
Batf	Sp1	0.436782
Batf	Sp3	0.586207
Batf	Sp4	0.724138
Batf	Spib	0.83908	525
Batf	Srebf1	0.0114943
Batf	Srf	0.0172414	174
Batf	Stat1	0.931034	492
Batf	Stat3	0.626437	767
Batf	Stat5a	0.787356	558
Batf	Stat5b	0.804598	316
Batf	Stat6	0.712644	538
Batf	Taf1	0.109195	202
Batf	Taf7	0.00574713
Batf	Tal1	0
Batf	Tbx2	0.00574713
Batf	Tcf12	0.327586	206
Batf	Tcf7	0.83908	421
Batf	Tcf7l2	0.0114943
Batf	Tead2	0	192
Batf	Tead3	0	192
Batf	Tead4	0	208
Batf	Tef	0.0114943
Batf	Tfdp1	0.0517241
Batf	Tfe3	0.344828
Batf	Tgif1	0.672414
Batf	Trp53	0.0747126	201
Batf	Usf1	0.482759	374
Batf	Usf2	0.58046	241
Batf	Xbp1	0.0172414	359
Batf	Yy1	0.37931	219
Bcl3	Arid3a	0.293103	184
Bcl3	Atf3	0.666667	369
Bcl3	Atf4	0.712644
Bcl3	Atf7	0.0517241
Bcl3	Bach1	0.850575
Bcl3	Batf	0.821839	337
Bcl3	Bcl3	0.994253
Bcl3	Bdp1	0
Bcl3	Bhlhe41	0.0977011
Bcl3	Cebpa	0.275862	180
Bcl3	Cebpb	0.908046	346
Bcl3	Cebpd	0.655172
Bcl3	Cebpe	0.172414
Bcl3	Cebpz	0.0402299
Bcl3	Creb3	0.0287356
Bcl3	Creb3l1	0.304598
Bcl3	Crem	0.885057
Bcl3	Ctcf	0.0344828	244
Bcl3	Dbp	0.0977011
Bcl3	Ddit3	0.586207	261
Bcl3	E2f1	0	165
Bcl3	E2f2	0.0287356
Bcl3	E2f4	0	219
Bcl3	E2f6	0	198
Bcl3	E2f7	0
Bcl3	Egr1	0.528736	349
Bcl3	Egr2	0.752874	200
Bcl3	Ehf	0.0402299
Bcl3	Elf1	0.695402	325
Bcl3	Elf2	0.218391
Bcl3	Elf3	0.172414
Bcl3	Elf4	0.45977	223
Bcl3	Elk1	0
Bcl3	Elk3	0.551724
Bcl3	Elk4	0.264368
Bcl3	Eomes	0
Bcl3	Ep300	0.126437	316
Bcl3	Esrra	0.0517241	161
Bcl3	Ets1	0.66092	219
Bcl3	Ets2	0.764368	269
Bcl3	Etv3	0.850575	310
Bcl3	Fli1	0.58046
Bcl3	Fos	0.603448	412
Bcl3	Fosb	0.683908	216
Bcl3	Fosl1	0.534483	230
Bcl3	Fosl2	0.862069	308
Bcl3	Foxa2	0.0114943
Bcl3	Foxc1	0.333333
Bcl3	Foxk1	0.0632184
Bcl3	Foxo1	0.672414	217
Bcl3	Foxo3	0.0747126	229
Bcl3	Foxp1	0.528736
Bcl3	Foxp2	0
Bcl3	Gabpa	0
Bcl3	Gata2	0.591954	185
Bcl3	Gata3	0.206897	271
Bcl3	Gata6	0.0747126
Bcl3	Gfi1	0
Bcl3	Gli1	0.0402299	152
Bcl3	Gli2	0.316092	172
Bcl3	Gmeb1	0.00574713
Bcl3	Gmeb2	0.316092
Bcl3	Grhl1	0.178161
Bcl3	Gtf2b	0	190
Bcl3	Hcfc1	0
Bcl3	Hdac2	0	256
Bcl3	Hlf	0
Bcl3	Hnf1b	0.0344828
Bcl3	Hoxa5	0
Bcl3	Hoxa7	0
Bcl3	Hoxa9	0
Bcl3	Hoxb2	0.0114943
Bcl3	Hoxb5	0
Bcl3	Hoxb7	0
Bcl3	Hoxc10	0.16092
Bcl3	Hoxc6	0.166667
Bcl3	Hsf1	0.0114943
Bcl3	Ikzf1	0.37931	250
Bcl3	Irf1	0.971264	449
Bcl3	Irf2	0.695402	191
Bcl3	Irf3	0.0402299	216
Bcl3	Irf5	0.752874	238
Bcl3	Irf7	0.931034	332
Bcl3	Irf8	0.678161	264
Bcl3	Irf9	0.908046	187
Bcl3	Jun	0.557471	702
Bcl3	Junb	0.913793	374
Bcl3	Jund	0.833333	177
Bcl3	Kdm5a	0.109195
Bcl3	Klf1	0
Bcl3	Klf15	0.00574713
Bcl3	Klf16	0.718391
Bcl3	Klf5	0.0517241	209
Bcl3	Lef1	0.442529
Bcl3	Mafb	0.551724	245
Bcl3	Maff	0.712644	354
Bcl3	Mafg	0.41954	215
Bcl3	Mafk	0.781609	292
Bcl3	Mecp2	0.0402299
Bcl3	Mef2a	0.454023	151
Bcl3	Mef2d	0.293103	166
Bcl3	Mitf	0.310345
Bcl3	Msx1	0.275862	192
Bcl3	Mxi1	0.16092	191
Bcl3	Myc	0.764368	404
Bcl3	Nfat5	0.350575
Bcl3	Nfatc2	0.333333
Bcl3	Nfatc4	0.172414
Bcl3	Nfe2	0.155172	159
Bcl3	Nfia	0.206897
Bcl3	Nfic	0.132184	180
Bcl3	Nfil3	0.856322	248
Bcl3	Nfkb2	0.948276	855
Bcl3	Nfya	0.155172
Bcl3	Nfyb	0	196
Bcl3	Nr1h3	0.310345
Bcl3	Nr2c2	0.0172414	175
Bcl3	Nr2f2	0.0402299
Bcl3	Nr2f6	0.045977
Bcl3	Nr3c1	0.143678	181
Bcl3	Patz1	0.0402299
Bcl3	Pbx3	0
Bcl3	Pitx2	0.00574713
Bcl3	Pknox1	0.557471
Bcl3	Pml	0.229885
Bcl3	Pou2af1	0.304598	266
Bcl3	Ppard	0.103448
Bcl3	Pparg	0.557471
Bcl3	Rara	0.678161	241
Bcl3	Rarg	0.045977
Bcl3	Rel	0.821839	887
Bcl3	Rela	0.936782	880
Bcl3	Relb	0.971264	923
Bcl3	Rest	0	180
Bcl3	Runx3	0.724138
Bcl3	Rxra	0.293103	205
Bcl3	Rxrb	0.103448
Bcl3	Setdb1	0
Bcl3	Sin3a	0	223
Bcl3	Snai3	0
Bcl3	Sox10	0.310345
Bcl3	Sox11	0.327586
Bcl3	Sox17	0.66092
Bcl3	Sox2	0
Bcl3	Sp1	0.143678	166
Bcl3	Sp3	0.206897
Bcl3	Sp4	0.270115
Bcl3	Spib	0.62069	219
Bcl3	Srebf1	0.0402299
Bcl3	Srf	0.229885
Bcl3	Stat1	0.775862	502
Bcl3	Stat3	0.942529	775
Bcl3	Stat5a	0.281609	368
Bcl3	Stat5b	0.229885	220
Bcl3	Stat6	0.367816	308
Bcl3	Taf1	0	238
Bcl3	Taf7	0.494253	182
Bcl3	Tal1	0.0287356	183
Bcl3	Tbx2	0.0574713
Bcl3	Tcf12	0.045977	220
Bcl3	Tcf7	0.241379
Bcl3	Tcf7l2	0.252874
Bcl3	Tead2	0.00574713
Bcl3	Tead3	0.0632184
Bcl3	Tead4	0.270115
Bcl3	Tef	0.0862069
Bcl3	Tfdp1	0
Bcl3	Tfe3	0.551724	159
Bcl3	Tgif1	0.862069
Bcl3	Trp53	0	440
Bcl3	Usf1	0	176
Bcl3	Usf2	0.109195
Bcl3	Xbp1	0.632184	204
Bcl3	Yy1	0	232
Bdp1	Arid3a	0.58046
Bdp1	Atf3	0
Bdp1	Atf4	0
Bdp1	Atf7	0.166667
Bdp1	Bach1	0.0172414
Bdp1	Batf	0.287356
Bdp1	Bcl3	0
Bdp1	Bdp1	0.994253
Bdp1	Bhlhe41	0
Bdp1	Cebpa	0.0402299
Bdp1	Cebpb	0
Bdp1	Cebpd	0.155172
Bdp1	Cebpe	0.655172
Bdp1	Cebpz	0.672414
Bdp1	Creb3	0
Bdp1	Creb3l1	0
Bdp1	Crem	0
Bdp1	Ctcf	0.683908
Bdp1	Dbp	0
Bdp1	Ddit3	0
Bdp1	E2f1	0.649425
Bdp1	E2f2	0.655172
Bdp1	E2f4	0.626437
Bdp1	E2f6	0.614943
Bdp1	E2f7	0.62069
Bdp1	Egr1	0
Bdp1	Egr2	0
Bdp1	Ehf	0.0229885
Bdp1	Elf1	0.563218
Bdp1	Elf2	0.758621
Bdp1	Elf3	0.0172414
Bdp1	Elf4	0.58046
Bdp1	Elk1	0.591954
Bdp1	Elk3	0
Bdp1	Elk4	0.729885
Bdp1	Eomes	0.735632
Bdp1	Ep300	0.712644
Bdp1	Esrra	0.0229885
Bdp1	Ets1	0.465517
Bdp1	Ets2	0.00574713
Bdp1	Etv3	0.218391
Bdp1	Fli1	0.557471
Bdp1	Fos	0
Bdp1	Fosb	0
Bdp1	Fosl1	0
Bdp1	Fosl2	0
Bdp1	Foxa2	0
Bdp1	Foxc1	0
Bdp1	Foxk1	0.0747126
Bdp1	Foxo1	0.0689655
Bdp1	Foxo3	0.0517241
Bdp1	Foxp1	0.442529
Bdp1	Foxp2	0
Bdp1	Gabpa	0.804598
Bdp1	Gata2	0.287356
Bdp1	Gata3	0.0574713
Bdp1	Gata6	0
Bdp1	Gfi1	0.574713
Bdp1	Gli1	0
Bdp1	Gli2	0
Bdp1	Gmeb1	0.66092
Bdp1	Gmeb2	0.545977
Bdp1	Grhl1	0.00574713
Bdp1	Gtf2b	0.517241	798
Bdp1	Hcfc1	0.758621
Bdp1	Hdac2	0.0172414
Bdp1	Hlf	0.0114943
Bdp1	Hnf1b	0
Bdp1	Hoxa5	0
Bdp1	Hoxa7	0
Bdp1	Hoxa9	0
Bdp1	Hoxb2	0
Bdp1	Hoxb5	0
Bdp1	Hoxb7	0
Bdp1	Hoxc10	0
Bdp1	Hoxc6	0
Bdp1	Hsf1	0.551724
Bdp1	Ikzf1	0.591954
Bdp1	Irf1	0
Bdp1	Irf2	0.522989
Bdp1	Irf3	0.632184
Bdp1	Irf5	0.327586
Bdp1	Irf7	0.0574713
Bdp1	Irf8	0.465517
Bdp1	Irf9	0.298851
Bdp1	Jun	0
Bdp1	Junb	0
Bdp1	Jund	0
Bdp1	Kdm5a	0.821839
Bdp1	Klf1	0.137931
Bdp1	Klf15	0
Bdp1	Klf16	0.0747126
Bdp1	Klf5	0.0344828
Bdp1	Lef1	0.316092
Bdp1	Mafb	0
Bdp1	Maff	0
Bdp1	Mafg	0.356322
Bdp1	Mafk	0
Bdp1	Mecp2	0.281609
Bdp1	Mef2a	0
Bdp1	Mef2d	0.37931
Bdp1	Mitf	0
Bdp1	Msx1	0.0862069
Bdp1	Mxi1	0.482759
Bdp1	Myc	0	158
Bdp1	Nfat5	0.00574713	290
Bdp1	Nfatc2	0
Bdp1	Nfatc4	0
Bdp1	Nfe2	0.637931
Bdp1	Nfia	0
Bdp1	Nfic	0
Bdp1	Nfil3	0
Bdp1	Nfkb2	0.178161
Bdp1	Nfya	0.482759
Bdp1	Nfyb	0.666667	172
Bdp1	Nr1h3	0
Bdp1	Nr2c2	0.770115
Bdp1	Nr2f2	0
Bdp1	Nr2f6	0.0229885
Bdp1	Nr3c1	0.643678
Bdp1	Patz1	0.58046
Bdp1	Pbx3	0.241379
Bdp1	Pitx2	0
Bdp1	Pknox1	0.109195
Bdp1	Pml	0.678161
Bdp1	Pou2af1	0.586207
Bdp1	Ppard	0
Bdp1	Pparg	0
Bdp1	Rara	0.252874
Bdp1	Rarg	0
Bdp1	Rel	0.270115
Bdp1	Rela	0.149425
Bdp1	Relb	0.114943
Bdp1	Rest	0.632184
Bdp1	Runx3	0.413793
Bdp1	Rxra	0.00574713
Bdp1	Rxrb	0.425287
Bdp1	Setdb1	0.896552
Bdp1	Sin3a	0.804598
Bdp1	Snai3	0.816092
Bdp1	Sox10	0
Bdp1	Sox11	0
Bdp1	Sox17	0.0172414
Bdp1	Sox2	0.287356
Bdp1	Sp1	0.747126
Bdp1	Sp3	0.551724
Bdp1	Sp4	0.678161
Bdp1	Spib	0.551724
Bdp1	Srebf1	0
Bdp1	Srf	0
Bdp1	Stat1	0.396552
Bdp1	Stat3	0
Bdp1	Stat5a	0.270115
Bdp1	Stat5b	0.287356
Bdp1	Stat6	0.413793
Bdp1	Taf1	0.816092	509
Bdp1	Taf7	0.465517
Bdp1	Tal1	0.247126
Bdp1	Tbx2	0
Bdp1	Tcf12	0.413793
Bdp1	Tcf7	0.235632
Bdp1	Tcf7l2	0
Bdp1	Tead2	0.00574713
Bdp1	Tead3	0
Bdp1	Tead4	0.62069
Bdp1	Tef	0
Bdp1	Tfdp1	0.62069
Bdp1	Tfe3	0
Bdp1	Tgif1	0
Bdp1	Trp53	0.609195	165
Bdp1	Usf1	0.586207
Bdp1	Usf2	0.264368
Bdp1	Xbp1	0
Bdp1	Yy1	0.821839
Bhlhe41	Arid3a	0.00574713	223
Bhlhe41	Atf3	0.436782	197
Bhlhe41	Atf4	0.5
Bhlhe41	Atf7	0.0632184
Bhlhe41	Bach1	0.396552
Bhlhe41	Batf	0.0172414	175
Bhlhe41	Bcl3	0.0977011
Bhlhe41	Bdp1	0
Bhlhe41	Bhlhe41	0.994253
Bhlhe41	Cebpa	0.706897	567
Bhlhe41	Cebpb	0.224138	580
Bhlhe41	Cebpd	0.0402299
Bhlhe41	Cebpe	0
Bhlhe41	Cebpz	0.0517241
Bhlhe41	Creb3	0.683908
Bhlhe41	Creb3l1	0.402299
Bhlhe41	Crem	0.241379
Bhlhe41	Ctcf	0
Bhlhe41	Dbp	0.385057	509
Bhlhe41	Ddit3	0.166667
Bhlhe41	E2f1	0
Bhlhe41	E2f2	0
Bhlhe41	E2f4	0
Bhlhe41	E2f6	0	175
Bhlhe41	E2f7	0
Bhlhe41	Egr1	0.41954	167
Bhlhe41	Egr2	0.402299
Bhlhe41	Ehf	0.735632
Bhlhe41	Elf1	0
Bhlhe41	Elf2	0
Bhlhe41	Elf3	0.793103
Bhlhe41	Elf4	0.00574713
Bhlhe41	Elk1	0.0689655
Bhlhe41	Elk3	0.241379
Bhlhe41	Elk4	0	167
Bhlhe41	Eomes	0.0402299
Bhlhe41	Ep300	0	198
Bhlhe41	Esrra	0.494253
Bhlhe41	Ets1	0
Bhlhe41	Ets2	0.689655
Bhlhe41	Etv3	0.0689655
Bhlhe41	Fli1	0.00574713
Bhlhe41	Fos	0.344828	171
Bhlhe41	Fosb	0.454023
Bhlhe41	Fosl1	0.528736	171
Bhlhe41	Fosl2	0.356322
Bhlhe41	Foxa2	0.557471
Bhlhe41	Foxc1	0.511494
Bhlhe41	Foxk1	0.16092
Bhlhe41	Foxo1	0.143678
Bhlhe41	Foxo3	0
Bhlhe41	Foxp1	0
Bhlhe41	Foxp2	0.568966
Bhlhe41	Gabpa	0
Bhlhe41	Gata2	0.045977	197
Bhlhe41	Gata3	0.758621	358
Bhlhe41	Gata6	0.471264	198
Bhlhe41	Gfi1	0	244
Bhlhe41	Gli1	0.362069
Bhlhe41	Gli2	0.235632	176
Bhlhe41	Gmeb1	0.00574713	151
Bhlhe41	Gmeb2	0.0172414
Bhlhe41	Grhl1	0.614943
Bhlhe41	Gtf2b	0	215
Bhlhe41	Hcfc1	0
Bhlhe41	Hdac2	0.0804598	170
Bhlhe41	Hlf	0.511494	338
Bhlhe41	Hnf1b	0.729885
Bhlhe41	Hoxa5	0.195402
Bhlhe41	Hoxa7	0.149425
Bhlhe41	Hoxa9	0.517241
Bhlhe41	Hoxb2	0.448276
Bhlhe41	Hoxb5	0.189655
Bhlhe41	Hoxb7	0.431034
Bhlhe41	Hoxc10	0.350575
Bhlhe41	Hoxc6	0.45977
Bhlhe41	Hsf1	0	239
Bhlhe41	Ikzf1	0
Bhlhe41	Irf1	0.0574713
Bhlhe41	Irf2	0
Bhlhe41	Irf3	0
Bhlhe41	Irf5	0.0344828
Bhlhe41	Irf7	0.0229885
Bhlhe41	Irf8	0.0172414
Bhlhe41	Irf9	0.0172414
Bhlhe41	Jun	0.408046	172
Bhlhe41	Junb	0.235632
Bhlhe41	Jund	0.362069
Bhlhe41	Kdm5a	0.0114943
Bhlhe41	Klf1	0
Bhlhe41	Klf15	0.517241	171
Bhlhe41	Klf16	0.103448
Bhlhe41	Klf5	0.603448
Bhlhe41	Lef1	0
Bhlhe41	Mafb	0.752874
Bhlhe41	Maff	0.534483
Bhlhe41	Mafg	0.235632
Bhlhe41	Mafk	0.574713
Bhlhe41	Mecp2	0.465517
Bhlhe41	Mef2a	0.442529
Bhlhe41	Mef2d	0
Bhlhe41	Mitf	0.724138
Bhlhe41	Msx1	0.356322
Bhlhe41	Mxi1	0.350575	199
Bhlhe41	Myc	0.402299	270
Bhlhe41	Nfat5	0.425287
Bhlhe41	Nfatc2	0.494253
Bhlhe41	Nfatc4	0.333333
Bhlhe41	Nfe2	0
Bhlhe41	Nfia	0.402299
Bhlhe41	Nfic	0.396552	203
Bhlhe41	Nfil3	0.229885	815
Bhlhe41	Nfkb2	0.0402299
Bhlhe41	Nfya	0
Bhlhe41	Nfyb	0
Bhlhe41	Nr1h3	0.281609	224
Bhlhe41	Nr2c2	0
Bhlhe41	Nr2f2	0.41954
Bhlhe41	Nr2f6	0.672414
Bhlhe41	Nr3c1	0.0229885	193
Bhlhe41	Patz1	0
Bhlhe41	Pbx3	0.597701
Bhlhe41	Pitx2	0.402299
Bhlhe41	Pknox1	0.0114943
Bhlhe41	Pml	0
Bhlhe41	Pou2af1	0	155
Bhlhe41	Ppard	0.890805
Bhlhe41	Pparg	0.597701	184
Bhlhe41	Rara	0.0229885
Bhlhe41	Rarg	0.149425
Bhlhe41	Rel	0.0344828
Bhlhe41	Rela	0.143678
Bhlhe41	Relb	0.0574713
Bhlhe41	Rest	0
Bhlhe41	Runx3	0	202
Bhlhe41	Rxra	0.37931	303
Bhlhe41	Rxrb	0.0114943	184
Bhlhe41	Setdb1	0.00574713
Bhlhe41	Sin3a	0
Bhlhe41	Snai3	0.275862
Bhlhe41	Sox10	0.988506
Bhlhe41	Sox11	0.321839
Bhlhe41	Sox17	0.178161
Bhlhe41	Sox2	0.454023
Bhlhe41	Sp1	0	483
Bhlhe41	Sp3	0
Bhlhe41	Sp4	0.0747126
Bhlhe41	Spib	0
Bhlhe41	Srebf1	0.83908	165
Bhlhe41	Srf	0.862069
Bhlhe41	Stat1	0	226
Bhlhe41	Stat3	0.356322	156
Bhlhe41	Stat5a	0.747126	156
Bhlhe41	Stat5b	0
Bhlhe41	Stat6	0.00574713
Bhlhe41	Taf1	0.0114943
Bhlhe41	Taf7	0.0632184
Bhlhe41	Tal1	0.0229885	182
Bhlhe41	Tbx2	0.344828
Bhlhe41	Tcf12	0.0229885	240
Bhlhe41	Tcf7	0	206
Bhlhe41	Tcf7l2	0.614943
Bhlhe41	Tead2	0.770115
Bhlhe41	Tead3	0.442529
Bhlhe41	Tead4	0.287356
Bhlhe41	Tef	0.873563	540
Bhlhe41	Tfdp1	0	240
Bhlhe41	Tfe3	0.913793	236
Bhlhe41	Tgif1	0.568966	163
Bhlhe41	Trp53	0	389
Bhlhe41	Usf1	0	233
Bhlhe41	Usf2	0.0114943	231
Bhlhe41	Xbp1	0.534483
Bhlhe41	Yy1	0
Cebpa	Arid3a	0.787356	375
Cebpa	Atf3	0.241379	586
Cebpa	Atf4	0.0229885	591
Cebpa	Atf7	0.0229885
Cebpa	Bach1	0.856322
Cebpa	Batf	0.293103	333
Cebpa	Bcl3	0.275862	180
Cebpa	Bdp1	0.0402299
Cebpa	Bhlhe41	0.706897	567
Cebpa	Cebpa	0.994253
Cebpa	Cebpb	0.66092	906
Cebpa	Cebpd	0.488506
Cebpa	Cebpe	0.735632	405
Cebpa	Cebpz	0.0574713	188
Cebpa	Creb3	0.534483	207
Cebpa	Creb3l1	0.0172414	253
Cebpa	Crem	0.045977	462
Cebpa	Ctcf	0.091954	515
Cebpa	Dbp	0.212644	320
Cebpa	Ddit3	0.12069	903
Cebpa	E2f1	0.224138	789
Cebpa	E2f2	0.390805	234
Cebpa	E2f4	0	315
Cebpa	E2f6	0	193
Cebpa	E2f7	0.00574713	192
Cebpa	Egr1	0.0517241	598
Cebpa	Egr2	0.0574713	351
Cebpa	Ehf	0.58046	159
Cebpa	Elf1	0.270115
Cebpa	Elf2	0
Cebpa	Elf3	0.643678	262
Cebpa	Elf4	0.758621	159
Cebpa	Elk1	0	163
Cebpa	Elk3	0.281609
Cebpa	Elk4	0.045977	267
Cebpa	Eomes	0
Cebpa	Ep300	0.33908	746
Cebpa	Esrra	0.390805	152
Cebpa	Ets1	0.166667	485
Cebpa	Ets2	0.258621	424
Cebpa	Etv3	0.758621
Cebpa	Fli1	0.695402	150
Cebpa	Fos	0.195402	565
Cebpa	Fosb	0.0574713	223
Cebpa	Fosl1	0.183908	382
Cebpa	Fosl2	0.247126	346
Cebpa	Foxa2	0.890805	696
Cebpa	Foxc1	0.0287356	160
Cebpa	Foxk1	0.183908
Cebpa	Foxo1	0.0172414	843
Cebpa	Foxo3	0	328
Cebpa	Foxp1	0.00574713	164
Cebpa	Foxp2	0.0517241
Cebpa	Gabpa	0	264
Cebpa	Gata2	0.390805	723
Cebpa	Gata3	0.103448	559
Cebpa	Gata6	0.0402299	374
Cebpa	Gfi1	0.103448	545
Cebpa	Gli1	0.0402299
Cebpa	Gli2	0.0229885
Cebpa	Gmeb1	0.0229885
Cebpa	Gmeb2	0
Cebpa	Grhl1	0.637931
Cebpa	Gtf2b	0	289
Cebpa	Hcfc1	0.304598
Cebpa	Hdac2	0	250
Cebpa	Hlf	0.678161
Cebpa	Hnf1b	0.488506	312
Cebpa	Hoxa5	0	195
Cebpa	Hoxa7	0	176
Cebpa	Hoxa9	0.0344828	523
Cebpa	Hoxb2	0	230
Cebpa	Hoxb5	0
Cebpa	Hoxb7	0.0114943	343
Cebpa	Hoxc10	0.00574713
Cebpa	Hoxc6	0.0229885
Cebpa	Hsf1	0.0747126	250
Cebpa	Ikzf1	0.62069	498
Cebpa	Irf1	0.178161	291
Cebpa	Irf2	0.494253	197
Cebpa	Irf3	0.201149
Cebpa	Irf5	0.804598	175
Cebpa	Irf7	0.528736	202
Cebpa	Irf8	0.821839	474
Cebpa	Irf9	0.448276	280
Cebpa	Jun	0.241379	780
Cebpa	Junb	0.206897	312
Cebpa	Jund	0.195402	371
Cebpa	Kdm5a	0.0862069
Cebpa	Klf1	0	472
Cebpa	Klf15	0.706897	415
Cebpa	Klf16	0.321839
Cebpa	Klf5	0.333333	437
Cebpa	Lef1	0.0172414	336
Cebpa	Mafb	0.988506	381
Cebpa	Maff	0.109195	282
Cebpa	Mafg	0.683908	362
Cebpa	Mafk	0.12069	307
Cebpa	Mecp2	0
Cebpa	Mef2a	0.775862	234
Cebpa	Mef2d	0.132184	211
Cebpa	Mitf	0.856322
Cebpa	Msx1	0	188
Cebpa	Mxi1	0.833333	286
Cebpa	Myc	0.0574713	618
Cebpa	Nfat5	0.212644	422
Cebpa	Nfatc2	0.0517241	227
Cebpa	Nfatc4	0.0172414	259
Cebpa	Nfe2	0.718391	189
Cebpa	Nfia	0.0632184	381
Cebpa	Nfic	0.16092	304
Cebpa	Nfil3	0.494253	336
Cebpa	Nfkb2	0.275862	261
Cebpa	Nfya	0.241379	402
Cebpa	Nfyb	0	242
Cebpa	Nr1h3	0.683908	470
Cebpa	Nr2c2	0.224138
Cebpa	Nr2f2	0.0287356	155
Cebpa	Nr2f6	0.66092
Cebpa	Nr3c1	0.643678	546
Cebpa	Patz1	0.241379
Cebpa	Pbx3	0.0287356	437
Cebpa	Pitx2	0.0862069
Cebpa	Pknox1	0.0344828
Cebpa	Pml	0.0287356	152
Cebpa	Pou2af1	0.12069
Cebpa	Ppard	0.58046	367
Cebpa	Pparg	0.37931	851
Cebpa	Rara	0.695402	600
Cebpa	Rarg	0.0172414	237
Cebpa	Rel	0.58046	319
Cebpa	Rela	0.0804598	406
Cebpa	Relb	0.321839	238
Cebpa	Rest	0	484
Cebpa	Runx3	0.385057	697
Cebpa	Rxra	0.902299	497
Cebpa	Rxrb	0.408046	181
Cebpa	Setdb1	0.0287356	208
Cebpa	Sin3a	0	187
Cebpa	Snai3	0	164
Cebpa	Sox10	0.155172	456
Cebpa	Sox11	0	177
Cebpa	Sox17	0.0172414	261
Cebpa	Sox2	0	395
Cebpa	Sp1	0.252874	317
Cebpa	Sp3	0.178161	195
Cebpa	Sp4	0.178161
Cebpa	Spib	0.327586	296
Cebpa	Srebf1	0.931034	794
Cebpa	Srf	0.12069	299
Cebpa	Stat1	0.431034	467
Cebpa	Stat3	0.356322	586
Cebpa	Stat5a	0.0114943	593
Cebpa	Stat5b	0.0632184	439
Cebpa	Stat6	0.545977	403
Cebpa	Taf1	0.00574713
Cebpa	Taf7	0
Cebpa	Tal1	0.333333	497
Cebpa	Tbx2	0.132184
Cebpa	Tcf12	0.143678	159
Cebpa	Tcf7	0.00574713	307
Cebpa	Tcf7l2	0.229885	642
Cebpa	Tead2	0
Cebpa	Tead3	0.0114943
Cebpa	Tead4	0	151
Cebpa	Tef	0.603448	212
Cebpa	Tfdp1	0.0114943
Cebpa	Tfe3	0.948276
Cebpa	Tgif1	0.045977
Cebpa	Trp53	0	610
Cebpa	Usf1	0.488506	408
Cebpa	Usf2	0.643678	299
Cebpa	Xbp1	0.586207	588
Cebpa	Yy1	0.0114943	470
Cebpb	Arid3a	0.735632	248
Cebpb	Atf3	0.689655	753
Cebpb	Atf4	0.793103	630
Cebpb	Atf7	0.12069
Cebpb	Bach1	0.896552	180
Cebpb	Batf	0.454023	291
Cebpb	Bcl3	0.908046	346
Cebpb	Bdp1	0
Cebpb	Bhlhe41	0.224138	580
Cebpb	Cebpa	0.66092	906
Cebpb	Cebpb	0.994253
Cebpb	Cebpd	0.948276
Cebpb	Cebpe	0.632184	330
Cebpb	Cebpz	0
Cebpb	Creb3	0.333333	253
Cebpb	Creb3l1	0.66092	198
Cebpb	Crem	0.718391	467
Cebpb	Ctcf	0	447
Cebpb	Dbp	0.465517	308
Cebpb	Ddit3	0.775862	863
Cebpb	E2f1	0.00574713	349
Cebpb	E2f2	0.091954	170
Cebpb	E2f4	0	355
Cebpb	E2f6	0	249
Cebpb	E2f7	0	151
Cebpb	Egr1	0.787356	607
Cebpb	Egr2	0.83908	942
Cebpb	Ehf	0.0287356
Cebpb	Elf1	0.114943	174
Cebpb	Elf2	0
Cebpb	Elf3	0.091954	184
Cebpb	Elf4	0.574713
Cebpb	Elk1	0	214
Cebpb	Elk3	0.471264
Cebpb	Elk4	0	216
Cebpb	Eomes	0
Cebpb	Ep300	0.045977	838
Cebpb	Esrra	0.0172414	181
Cebpb	Ets1	0.091954	391
Cebpb	Ets2	0.591954	421
Cebpb	Etv3	0.775862
Cebpb	Fli1	0.402299
Cebpb	Fos	0.787356	726
Cebpb	Fosb	0.873563	338
Cebpb	Fosl1	0.551724	466
Cebpb	Fosl2	0.942529	477
Cebpb	Foxa2	0.0804598	486
Cebpb	Foxc1	0.568966	152
Cebpb	Foxk1	0.137931	155
Cebpb	Foxo1	0.344828	609
Cebpb	Foxo3	0.0344828	313
Cebpb	Foxp1	0.0114943
Cebpb	Foxp2	0.270115
Cebpb	Gabpa	0	197
Cebpb	Gata2	0.224138	476
Cebpb	Gata3	0.109195	421
Cebpb	Gata6	0.33908	204
Cebpb	Gfi1	0	401
Cebpb	Gli1	0.448276
Cebpb	Gli2	0.632184
Cebpb	Gmeb1	0.0114943
Cebpb	Gmeb2	0.0114943	150
Cebpb	Grhl1	0.212644
Cebpb	Gtf2b	0	357
Cebpb	Hcfc1	0
Cebpb	Hdac2	0	179
Cebpb	Hlf	0.0574713	154
Cebpb	Hnf1b	0.109195	274
Cebpb	Hoxa5	0.0862069	156
Cebpb	Hoxa7	0.0804598
Cebpb	Hoxa9	0.0229885	220
Cebpb	Hoxb2	0.37931
Cebpb	Hoxb5	0.0747126
Cebpb	Hoxb7	0.00574713	191
Cebpb	Hoxc10	0.413793
Cebpb	Hoxc6	0.494253
Cebpb	Hsf1	0	366
Cebpb	Ikzf1	0.258621	253
Cebpb	Irf1	0.775862	531
Cebpb	Irf2	0.229885	257
Cebpb	Irf3	0	190
Cebpb	Irf5	0.712644
Cebpb	Irf7	0.793103	246
Cebpb	Irf8	0.545977	660
Cebpb	Irf9	0.534483	211
Cebpb	Jun	0.614943	720
Cebpb	Junb	0.896552	593
Cebpb	Jund	0.913793	372
Cebpb	Kdm5a	0
Cebpb	Klf1	0	185
Cebpb	Klf15	0.218391	358
Cebpb	Klf16	0.45977	178
Cebpb	Klf5	0.0287356	959
Cebpb	Lef1	0	280
Cebpb	Mafb	0.695402	378
Cebpb	Maff	0.758621	430
Cebpb	Mafg	0.793103	349
Cebpb	Mafk	0.793103	399
Cebpb	Mecp2	0
Cebpb	Mef2a	0.545977	246
Cebpb	Mef2d	0.103448	179
Cebpb	Mitf	0.798851
Cebpb	Msx1	0.431034
Cebpb	Mxi1	0.517241	366
Cebpb	Myc	0.798851	721
Cebpb	Nfat5	0.557471	363
Cebpb	Nfatc2	0.609195	278
Cebpb	Nfatc4	0.637931	218
Cebpb	Nfe2	0.614943	152
Cebpb	Nfia	0.626437	207
Cebpb	Nfic	0.563218	309
Cebpb	Nfil3	0.982759	338
Cebpb	Nfkb2	0.689655	361
Cebpb	Nfya	0.0689655	295
Cebpb	Nfyb	0	235
Cebpb	Nr1h3	0.747126	351
Cebpb	Nr2c2	0
Cebpb	Nr2f2	0.477011	223
Cebpb	Nr2f6	0.0977011
Cebpb	Nr3c1	0.275862	533
Cebpb	Patz1	0.00574713
Cebpb	Pbx3	0.0172414	188
Cebpb	Pitx2	0.045977
Cebpb	Pknox1	0.12069
Cebpb	Pml	0
Cebpb	Pou2af1	0.0344828
Cebpb	Ppard	0.178161	310
Cebpb	Pparg	0.425287	810
Cebpb	Rara	0.775862	321
Cebpb	Rarg	0.206897	244
Cebpb	Rel	0.637931	416
Cebpb	Rela	0.689655	543
Cebpb	Relb	0.775862	326
Cebpb	Rest	0	249
Cebpb	Runx3	0.287356	666
Cebpb	Rxra	0.574713	408
Cebpb	Rxrb	0.0114943	183
Cebpb	Setdb1	0	154
Cebpb	Sin3a	0	603
Cebpb	Snai3	0
Cebpb	Sox10	0.402299	279
Cebpb	Sox11	0.264368
Cebpb	Sox17	0.189655
Cebpb	Sox2	0	237
Cebpb	Sp1	0.0804598	386
Cebpb	Sp3	0.0344828	283
Cebpb	Sp4	0.0114943
Cebpb	Spib	0.183908	313
Cebpb	Srebf1	0.091954	486
Cebpb	Srf	0.396552	343
Cebpb	Stat1	0.442529	556
Cebpb	Stat3	0.91954	671
Cebpb	Stat5a	0.0114943	546
Cebpb	Stat5b	0.0114943	442
Cebpb	Stat6	0.551724	491
Cebpb	Taf1	0	202
Cebpb	Taf7	0
Cebpb	Tal1	0	323
Cebpb	Tbx2	0.264368
Cebpb	Tcf12	0.0172414	199
Cebpb	Tcf7	0	221
Cebpb	Tcf7l2	0.66092	262
Cebpb	Tead2	0
Cebpb	Tead3	0.189655
Cebpb	Tead4	0	215
Cebpb	Tef	0.304598	151
Cebpb	Tfdp1	0
Cebpb	Tfe3	0.706897
Cebpb	Tgif1	0.764368	163
Cebpb	Trp53	0	544
Cebpb	Usf1	0	438
Cebpb	Usf2	0.258621	388
Cebpb	Xbp1	0.87931	367
Cebpb	Yy1	0	451
Cebpd	Arid3a	0.925287
Cebpd	Atf3	0.522989
Cebpd	Atf4	0.66092
Cebpd	Atf7	0.183908
Cebpd	Bach1	0.545977
Cebpd	Batf	0.0747126
Cebpd	Bcl3	0.655172
Cebpd	Bdp1	0.155172
Cebpd	Bhlhe41	0.0402299
Cebpd	Cebpa	0.488506
Cebpd	Cebpb	0.948276
Cebpd	Cebpd	0.994253
Cebpd	Cebpe	0.936782
Cebpd	Cebpz	0
Cebpd	Creb3	0.235632
Cebpd	Creb3l1	0.770115
Cebpd	Crem	0.298851
Cebpd	Ctcf	0.0862069
Cebpd	Dbp	0.666667
Cebpd	Ddit3	0.729885
Cebpd	E2f1	0.482759
Cebpd	E2f2	0.747126
Cebpd	E2f4	0
Cebpd	E2f6	0.0574713
Cebpd	E2f7	0.229885
Cebpd	Egr1	0.764368
Cebpd	Egr2	0.741379
Cebpd	Ehf	0
Cebpd	Elf1	0.126437
Cebpd	Elf2	0.00574713
Cebpd	Elf3	0.0287356
Cebpd	Elf4	0.862069
Cebpd	Elk1	0
Cebpd	Elk3	0.396552
Cebpd	Elk4	0.0114943
Cebpd	Eomes	0
Cebpd	Ep300	0.0574713
Cebpd	Esrra	0.0114943
Cebpd	Ets1	0.0632184
Cebpd	Ets2	0.454023
Cebpd	Etv3	0.229885
Cebpd	Fli1	0.712644
Cebpd	Fos	0.649425
Cebpd	Fosb	0.787356
Cebpd	Fosl1	0.270115
Cebpd	Fosl2	0.770115
Cebpd	Foxa2	0.0517241
Cebpd	Foxc1	0.574713
Cebpd	Foxk1	0.0229885
Cebpd	Foxo1	0.12069
Cebpd	Foxo3	0
Cebpd	Foxp1	0.00574713
Cebpd	Foxp2	0.385057
Cebpd	Gabpa	0.00574713
Cebpd	Gata2	0.643678
Cebpd	Gata3	0
Cebpd	Gata6	0.482759
Cebpd	Gfi1	0.091954
Cebpd	Gli1	0.655172
Cebpd	Gli2	0.816092
Cebpd	Gmeb1	0.321839
Cebpd	Gmeb2	0.045977
Cebpd	Grhl1	0.0114943
Cebpd	Gtf2b	0
Cebpd	Hcfc1	0.155172
Cebpd	Hdac2	0
Cebpd	Hlf	0.0747126
Cebpd	Hnf1b	0.0344828
Cebpd	Hoxa5	0.143678
Cebpd	Hoxa7	0.12069
Cebpd	Hoxa9	0.0804598
Cebpd	Hoxb2	0.436782
Cebpd	Hoxb5	0.166667
Cebpd	Hoxb7	0
Cebpd	Hoxc10	0.597701
Cebpd	Hoxc6	0.609195
Cebpd	Hsf1	0.0114943
Cebpd	Ikzf1	0.45977
Cebpd	Irf1	0.591954
Cebpd	Irf2	0.0402299
Cebpd	Irf3	0
Cebpd	Irf5	0.218391
Cebpd	Irf7	0.471264
Cebpd	Irf8	0.41954
Cebpd	Irf9	0.229885
[truncated: 28,277 more rows]
